# Supplementary material for: Integrated SMRT and Illumina Sequencing Provide New Insights into Crocin Biosynthesis of Gardenia jasminoides
Source: Int J Mol Sci. 2022 Jun 5;23(11):6321. doi: 10.3390/ijms23116321 (PMC9181021; doi:10.3390/ijms23116321)
Supplement: Supplementary file 1 [file ijms-23-06321-s001.zip › Table S1.xlsx]

## Sheet: Table S1
isoforms ID	ko ID	ko name
MSTRG.1001.1	ko03008	Ribosome biogenesis in eukaryotes
MSTRG.1001.1	ko03009	Ribosome biogenesis
MSTRG.1001.1	ko03012	Translation factors
MSTRG.10017.1	ko04121	Ubiquitin system
MSTRG.10018.1	ko04131	Membrane trafficking
MSTRG.10028.3	ko04075	Plant hormone signal transduction
MSTRG.10032.1	ko01002	Peptidases and inhibitors
MSTRG.10032.1	ko04121	Ubiquitin system
MSTRG.10049.2	ko00010	Glycolysis / Gluconeogenesis
MSTRG.10049.2	ko00030	Pentose phosphate pathway
MSTRG.10049.2	ko00500	Starch and sucrose metabolism
MSTRG.10049.2	ko00520	Amino sugar and nucleotide sugar metabolism
MSTRG.10049.2	ko04147	Exosome
MSTRG.10050.1	ko03016	Transfer RNA biogenesis
MSTRG.10062.2	ko00562	Inositol phosphate metabolism
MSTRG.10062.2	ko04070	Phosphatidylinositol signaling system
MSTRG.1008.1	ko04131	Membrane trafficking
MSTRG.1008.1	ko04144	Endocytosis
MSTRG.10084.1	ko01001	Protein kinases
MSTRG.1009.1	ko03018	RNA degradation
MSTRG.1009.1	ko03019	Messenger RNA biogenesis
MSTRG.1009.2	ko03018	RNA degradation
MSTRG.1009.2	ko03019	Messenger RNA biogenesis
MSTRG.10094.3	ko01003	Glycosyltransferases
MSTRG.10139.1	ko03008	Ribosome biogenesis in eukaryotes
MSTRG.10139.1	ko03009	Ribosome biogenesis
MSTRG.10142.1	ko00940	Phenylpropanoid biosynthesis
MSTRG.10142.1	ko01002	Peptidases and inhibitors
MSTRG.10149.2	ko01002	Peptidases and inhibitors
MSTRG.10161.1	ko01001	Protein kinases
MSTRG.10161.1	ko03008	Ribosome biogenesis in eukaryotes
MSTRG.10161.1	ko03009	Ribosome biogenesis
MSTRG.10161.1	ko04712	Circadian rhythm - plant
MSTRG.10164.1	ko03021	Transcription machinery
MSTRG.10164.1	ko03022	Basal transcription factors
MSTRG.10164.1	ko03036	Chromosome and associated proteins
MSTRG.1017.2	ko00900	Terpenoid backbone biosynthesis
MSTRG.1017.2	ko01006	Prenyltransferases
MSTRG.10179.1	ko03400	DNA repair and recombination proteins
MSTRG.10179.1	ko03420	Nucleotide excision repair
MSTRG.10179.1	ko04120	Ubiquitin mediated proteolysis
MSTRG.10179.1	ko04121	Ubiquitin system
MSTRG.10179.2	ko03400	DNA repair and recombination proteins
MSTRG.10179.2	ko03420	Nucleotide excision repair
MSTRG.10179.2	ko04120	Ubiquitin mediated proteolysis
MSTRG.10179.2	ko04121	Ubiquitin system
MSTRG.1018.1	ko00260	Glycine, serine and threonine metabolism
MSTRG.1018.1	ko00270	Cysteine and methionine metabolism
MSTRG.1018.1	ko00750	Vitamin B6 metabolism
MSTRG.1018.1	ko01007	Amino acid related enzymes
MSTRG.10184.1	ko00061	Fatty acid biosynthesis
MSTRG.10184.1	ko00254	Aflatoxin biosynthesis
MSTRG.10184.1	ko00620	Pyruvate metabolism
MSTRG.10184.1	ko00640	Propanoate metabolism
MSTRG.10189.2	ko03010	Ribosome
MSTRG.10189.2	ko03011	Ribosome
MSTRG.10196.1	ko00770	Pantothenate and CoA biosynthesis
MSTRG.10200.1	ko01001	Protein kinases
MSTRG.10200.1	ko04016	MAPK signaling pathway - plant
MSTRG.10200.1	ko04075	Plant hormone signal transduction
MSTRG.10200.1	ko04626	Plant-pathogen interaction
MSTRG.10204.1	ko04131	Membrane trafficking
MSTRG.10217.1	ko00790	Folate biosynthesis
MSTRG.10217.1	ko04131	Membrane trafficking
MSTRG.10223.1	ko03041	Spliceosome
MSTRG.10237.1	ko00510	N-Glycan biosynthesis
MSTRG.10237.1	ko00513	Various types of N-glycan biosynthesis
MSTRG.10237.1	ko04141	Protein processing in endoplasmic reticulum
MSTRG.1024.1	ko00270	Cysteine and methionine metabolism
MSTRG.1024.1	ko00920	Sulfur metabolism
MSTRG.10245.2	ko03019	Messenger RNA biogenesis
MSTRG.10245.2	ko03036	Chromosome and associated proteins
MSTRG.10250.2	ko02000	Transporters
MSTRG.10256.1	ko04131	Membrane trafficking
MSTRG.10261.1	ko01009	Protein phosphatases and associated proteins
MSTRG.10261.1	ko03015	mRNA surveillance pathway
MSTRG.10261.1	ko03019	Messenger RNA biogenesis
MSTRG.10261.1	ko03036	Chromosome and associated proteins
MSTRG.10263.1	ko00040	Pentose and glucuronate interconversions
MSTRG.10278.1	ko03009	Ribosome biogenesis
MSTRG.10284.1	ko00010	Glycolysis / Gluconeogenesis
MSTRG.10284.1	ko00620	Pyruvate metabolism
MSTRG.10284.1	ko04131	Membrane trafficking
MSTRG.10284.1	ko04147	Exosome
MSTRG.10287.1	ko00562	Inositol phosphate metabolism
MSTRG.10287.1	ko01009	Protein phosphatases and associated proteins
MSTRG.10287.1	ko04070	Phosphatidylinositol signaling system
MSTRG.10303.1	ko00900	Terpenoid backbone biosynthesis
MSTRG.10305.1	ko01001	Protein kinases
MSTRG.10305.1	ko04016	MAPK signaling pathway - plant
MSTRG.10305.1	ko04075	Plant hormone signal transduction
MSTRG.10305.1	ko04121	Ubiquitin system
MSTRG.10305.1	ko04131	Membrane trafficking
MSTRG.10306.2	ko00230	Purine metabolism
MSTRG.10306.2	ko00670	One carbon pool by folate
MSTRG.10306.2	ko04147	Exosome
MSTRG.10306.3	ko00230	Purine metabolism
MSTRG.10306.3	ko00670	One carbon pool by folate
MSTRG.10306.3	ko04147	Exosome
MSTRG.10307.1	ko03020	RNA polymerase
MSTRG.10307.1	ko03021	Transcription machinery
MSTRG.10307.1	ko03400	DNA repair and recombination proteins
MSTRG.10314.1	ko03029	Mitochondrial biogenesis
MSTRG.10332.1	ko03036	Chromosome and associated proteins
MSTRG.10332.1	ko04131	Membrane trafficking
MSTRG.10333.1	ko04131	Membrane trafficking
MSTRG.10333.1	ko04144	Endocytosis
MSTRG.1034.2	ko01009	Protein phosphatases and associated proteins
MSTRG.1034.2	ko03040	Spliceosome
MSTRG.1034.2	ko03041	Spliceosome
MSTRG.10343.1	ko03029	Mitochondrial biogenesis
MSTRG.10343.1	ko03110	Chaperones and folding catalysts
MSTRG.10343.1	ko04141	Protein processing in endoplasmic reticulum
MSTRG.10348.1	ko03015	mRNA surveillance pathway
MSTRG.10348.1	ko03019	Messenger RNA biogenesis
MSTRG.10350.2	ko01002	Peptidases and inhibitors
MSTRG.10350.2	ko04121	Ubiquitin system
MSTRG.10351.1	ko04016	MAPK signaling pathway - plant
MSTRG.10351.1	ko04075	Plant hormone signal transduction
MSTRG.10358.1	ko01009	Protein phosphatases and associated proteins
MSTRG.10358.1	ko03015	mRNA surveillance pathway
MSTRG.10358.1	ko03019	Messenger RNA biogenesis
MSTRG.10358.1	ko03021	Transcription machinery
MSTRG.10358.1	ko03041	Spliceosome
MSTRG.10361.1	ko01003	Glycosyltransferases
MSTRG.10368.1	ko04131	Membrane trafficking
MSTRG.10368.2	ko04131	Membrane trafficking
MSTRG.10368.3	ko04131	Membrane trafficking
MSTRG.10373.1	ko03019	Messenger RNA biogenesis
MSTRG.1038.1	ko00564	Glycerophospholipid metabolism
MSTRG.1038.1	ko00565	Ether lipid metabolism
MSTRG.1038.1	ko04131	Membrane trafficking
MSTRG.1038.1	ko04144	Endocytosis
MSTRG.10394.2	ko01003	Glycosyltransferases
MSTRG.10399.1	ko02000	Transporters
MSTRG.10399.1	ko02010	ABC transporters
MSTRG.10399.1	ko04090	CD molecules
MSTRG.10399.1	ko04147	Exosome
MSTRG.10401.1	ko03036	Chromosome and associated proteins
MSTRG.10401.1	ko04031	GTP-binding proteins
MSTRG.10401.1	ko04131	Membrane trafficking
MSTRG.10401.1	ko04144	Endocytosis
MSTRG.10401.1	ko04147	Exosome
MSTRG.10402.1	ko04131	Membrane trafficking
MSTRG.10402.1	ko04147	Exosome
MSTRG.10402.1	ko04812	Cytoskeleton proteins
MSTRG.10402.2	ko04131	Membrane trafficking
MSTRG.10402.2	ko04147	Exosome
MSTRG.10402.2	ko04812	Cytoskeleton proteins
MSTRG.10415.1	ko01009	Protein phosphatases and associated proteins
MSTRG.10415.1	ko03009	Ribosome biogenesis
MSTRG.10415.1	ko03029	Mitochondrial biogenesis
MSTRG.10415.1	ko03040	Spliceosome
MSTRG.10415.1	ko03041	Spliceosome
MSTRG.10415.1	ko03051	Proteasome
MSTRG.10415.1	ko03060	Protein export
MSTRG.10415.1	ko03110	Chaperones and folding catalysts
MSTRG.10415.1	ko04131	Membrane trafficking
MSTRG.10415.1	ko04141	Protein processing in endoplasmic reticulum
MSTRG.10415.1	ko04144	Endocytosis
MSTRG.10415.1	ko04147	Exosome
MSTRG.10416.1	ko01009	Protein phosphatases and associated proteins
MSTRG.10416.1	ko03009	Ribosome biogenesis
MSTRG.10416.1	ko03029	Mitochondrial biogenesis
MSTRG.10416.1	ko03040	Spliceosome
MSTRG.10416.1	ko03041	Spliceosome
MSTRG.10416.1	ko03051	Proteasome
MSTRG.10416.1	ko03110	Chaperones and folding catalysts
MSTRG.10416.1	ko04131	Membrane trafficking
MSTRG.10416.1	ko04141	Protein processing in endoplasmic reticulum
MSTRG.10416.1	ko04144	Endocytosis
MSTRG.10416.1	ko04147	Exosome
MSTRG.10419.1	ko00062	Fatty acid elongation
MSTRG.10419.1	ko01004	Lipid biosynthesis proteins
MSTRG.10419.1	ko01040	Biosynthesis of unsaturated fatty acids
MSTRG.10424.2	ko00510	N-Glycan biosynthesis
MSTRG.10424.2	ko01003	Glycosyltransferases
MSTRG.10446.1	ko00960	Tropane, piperidine and pyridine alkaloid biosynthesis
MSTRG.10458.1	ko00330	Arginine and proline metabolism
MSTRG.10459.1	ko01009	Protein phosphatases and associated proteins
MSTRG.10459.1	ko03015	mRNA surveillance pathway
MSTRG.10459.1	ko03019	Messenger RNA biogenesis
MSTRG.10459.1	ko03021	Transcription machinery
MSTRG.10459.1	ko03041	Spliceosome
MSTRG.10469.1	ko00790	Folate biosynthesis
MSTRG.10472.1	ko03010	Ribosome
MSTRG.10472.1	ko03011	Ribosome
MSTRG.10480.2	ko00710	Carbon fixation in photosynthetic organisms
MSTRG.10484.1	ko02000	Transporters
MSTRG.10484.1	ko04146	Peroxisome
MSTRG.10486.2	ko03010	Ribosome
MSTRG.10486.2	ko03011	Ribosome
MSTRG.10491.1	ko04075	Plant hormone signal transduction
MSTRG.10496.2	ko00400	Phenylalanine, tyrosine and tryptophan biosynthesis
MSTRG.10503.1	ko99980	Enzymes with EC numbers
MSTRG.10518.1	ko04131	Membrane trafficking
MSTRG.10521.1	ko04131	Membrane trafficking
MSTRG.10521.1	ko04144	Endocytosis
MSTRG.10521.1	ko04147	Exosome
MSTRG.10531.2	ko03400	DNA repair and recombination proteins
MSTRG.10531.2	ko03440	Homologous recombination
MSTRG.10553.3	ko00860	Porphyrin and chlorophyll metabolism
MSTRG.10556.1	ko00052	Galactose metabolism
MSTRG.10556.1	ko00561	Glycerolipid metabolism
MSTRG.10556.1	ko00600	Sphingolipid metabolism
MSTRG.10556.1	ko00603	Glycosphingolipid biosynthesis - globo and isoglobo series
MSTRG.10558.1	ko03000	Transcription factors
MSTRG.1056.1	ko04031	GTP-binding proteins
MSTRG.1056.1	ko04131	Membrane trafficking
MSTRG.1056.1	ko04145	Phagosome
MSTRG.1056.1	ko04147	Exosome
MSTRG.10568.2	ko00564	Glycerophospholipid metabolism
MSTRG.1057.1	ko04131	Membrane trafficking
MSTRG.1057.1	ko04144	Endocytosis
MSTRG.10573.3	ko01001	Protein kinases
MSTRG.10573.3	ko03016	Transfer RNA biogenesis
MSTRG.1059.1	ko03000	Transcription factors
MSTRG.1059.1	ko03019	Messenger RNA biogenesis
MSTRG.1059.1	ko03032	DNA replication proteins
MSTRG.10605.2	ko03021	Transcription machinery
MSTRG.10615.1	ko00600	Sphingolipid metabolism
MSTRG.10616.1	ko00511	Other glycan degradation
MSTRG.10617.2	ko00010	Glycolysis / Gluconeogenesis
MSTRG.10617.2	ko00030	Pentose phosphate pathway
MSTRG.10617.2	ko00051	Fructose and mannose metabolism
MSTRG.10617.2	ko00052	Galactose metabolism
MSTRG.10617.2	ko01009	Protein phosphatases and associated proteins
MSTRG.10617.2	ko03018	RNA degradation
MSTRG.10617.2	ko03019	Messenger RNA biogenesis
MSTRG.10623.3	ko99980	Enzymes with EC numbers
MSTRG.10631.1	ko03400	DNA repair and recombination proteins
MSTRG.10632.2	ko02000	Transporters
MSTRG.10636.1	ko04131	Membrane trafficking
MSTRG.10645.1	ko03010	Ribosome
MSTRG.10645.1	ko03011	Ribosome
MSTRG.10666.1	ko04626	Plant-pathogen interaction
MSTRG.10675.1	ko00051	Fructose and mannose metabolism
MSTRG.10675.1	ko00500	Starch and sucrose metabolism
MSTRG.10675.1	ko00520	Amino sugar and nucleotide sugar metabolism
MSTRG.10676.1	ko00073	Cutin, suberine and wax biosynthesis
MSTRG.10677.1	ko00010	Glycolysis / Gluconeogenesis
MSTRG.10677.1	ko00030	Pentose phosphate pathway
MSTRG.10677.1	ko00052	Galactose metabolism
MSTRG.10677.1	ko00230	Purine metabolism
MSTRG.10677.1	ko00500	Starch and sucrose metabolism
MSTRG.10677.1	ko00520	Amino sugar and nucleotide sugar metabolism
MSTRG.1069.1	ko03400	DNA repair and recombination proteins
MSTRG.1069.1	ko03410	Base excision repair
MSTRG.10701.1	ko03400	DNA repair and recombination proteins
MSTRG.10701.1	ko03430	Mismatch repair
MSTRG.10702.1	ko03015	mRNA surveillance pathway
MSTRG.10702.1	ko03019	Messenger RNA biogenesis
MSTRG.10710.1	ko00630	Glyoxylate and dicarboxylate metabolism
MSTRG.1071.1	ko01001	Protein kinases
MSTRG.1071.1	ko04626	Plant-pathogen interaction
MSTRG.10713.1	ko01002	Peptidases and inhibitors
MSTRG.10713.1	ko03110	Chaperones and folding catalysts
MSTRG.10714.1	ko01002	Peptidases and inhibitors
MSTRG.10714.3	ko03015	mRNA surveillance pathway
MSTRG.10714.3	ko03019	Messenger RNA biogenesis
MSTRG.10721.1	ko03010	Ribosome
MSTRG.10721.1	ko03011	Ribosome
MSTRG.10723.1	ko01001	Protein kinases
MSTRG.10723.1	ko04016	MAPK signaling pathway - plant
MSTRG.10737.1	ko01009	Protein phosphatases and associated proteins
MSTRG.10737.1	ko03029	Mitochondrial biogenesis
MSTRG.10737.1	ko03051	Proteasome
MSTRG.10737.1	ko03110	Chaperones and folding catalysts
MSTRG.10737.1	ko04131	Membrane trafficking
MSTRG.10737.1	ko04141	Protein processing in endoplasmic reticulum
MSTRG.10737.1	ko04147	Exosome
MSTRG.10737.1	ko04626	Plant-pathogen interaction
MSTRG.10747.1	ko04626	Plant-pathogen interaction
MSTRG.10753.1	ko00010	Glycolysis / Gluconeogenesis
MSTRG.10753.1	ko00620	Pyruvate metabolism
MSTRG.10753.1	ko04131	Membrane trafficking
MSTRG.10753.1	ko04147	Exosome
MSTRG.10759.2	ko04120	Ubiquitin mediated proteolysis
MSTRG.10759.2	ko04121	Ubiquitin system
MSTRG.10759.2	ko04141	Protein processing in endoplasmic reticulum
MSTRG.10768.1	ko04040	Ion channels
MSTRG.10768.1	ko04626	Plant-pathogen interaction
MSTRG.10768.2	ko04040	Ion channels
MSTRG.10768.2	ko04626	Plant-pathogen interaction
MSTRG.10771.3	ko01002	Peptidases and inhibitors
MSTRG.1077.1	ko01001	Protein kinases
MSTRG.1077.1	ko03021	Transcription machinery
MSTRG.1077.1	ko03036	Chromosome and associated proteins
MSTRG.10778.1	ko04120	Ubiquitin mediated proteolysis
MSTRG.10778.1	ko04121	Ubiquitin system
MSTRG.10779.1	ko01002	Peptidases and inhibitors
MSTRG.10779.1	ko04090	CD molecules
MSTRG.10779.1	ko04147	Exosome
MSTRG.1078.1	ko03032	DNA replication proteins
MSTRG.1078.1	ko03040	Spliceosome
MSTRG.1078.1	ko03041	Spliceosome
MSTRG.10785.1	ko04120	Ubiquitin mediated proteolysis
MSTRG.10785.1	ko04121	Ubiquitin system
MSTRG.10789.1	ko03036	Chromosome and associated proteins
MSTRG.10793.1	ko01009	Protein phosphatases and associated proteins
MSTRG.10793.1	ko03009	Ribosome biogenesis
MSTRG.10793.1	ko03029	Mitochondrial biogenesis
MSTRG.10793.1	ko03040	Spliceosome
MSTRG.10793.1	ko03041	Spliceosome
MSTRG.10793.1	ko03051	Proteasome
MSTRG.10793.1	ko03060	Protein export
MSTRG.10793.1	ko03110	Chaperones and folding catalysts
MSTRG.10793.1	ko04131	Membrane trafficking
MSTRG.10793.1	ko04141	Protein processing in endoplasmic reticulum
MSTRG.10793.1	ko04144	Endocytosis
MSTRG.10793.1	ko04147	Exosome
MSTRG.10794.1	ko03009	Ribosome biogenesis
MSTRG.10794.1	ko03013	Nucleocytoplasmic transport
MSTRG.10794.1	ko03036	Chromosome and associated proteins
MSTRG.1080.1	ko03015	mRNA surveillance pathway
MSTRG.1080.1	ko03019	Messenger RNA biogenesis
MSTRG.1080.1	ko03036	Chromosome and associated proteins
MSTRG.10808.1	ko99980	Enzymes with EC numbers
MSTRG.10838.1	ko03010	Ribosome
MSTRG.10838.1	ko03011	Ribosome
MSTRG.10843.1	ko03036	Chromosome and associated proteins
MSTRG.10843.1	ko04120	Ubiquitin mediated proteolysis
MSTRG.10843.1	ko04121	Ubiquitin system
MSTRG.10869.5	ko03008	Ribosome biogenesis in eukaryotes
MSTRG.10869.5	ko03009	Ribosome biogenesis
MSTRG.10869.5	ko03013	Nucleocytoplasmic transport
MSTRG.10869.5	ko03016	Transfer RNA biogenesis
MSTRG.10869.5	ko03019	Messenger RNA biogenesis
MSTRG.10869.5	ko03036	Chromosome and associated proteins
MSTRG.1088.1	ko00510	N-Glycan biosynthesis
MSTRG.1088.1	ko01003	Glycosyltransferases
MSTRG.1088.2	ko00510	N-Glycan biosynthesis
MSTRG.1088.2	ko01003	Glycosyltransferases
MSTRG.1090.1	ko00010	Glycolysis / Gluconeogenesis
MSTRG.1090.1	ko00030	Pentose phosphate pathway
MSTRG.1090.1	ko00051	Fructose and mannose metabolism
MSTRG.1090.1	ko00710	Carbon fixation in photosynthetic organisms
MSTRG.1090.1	ko03020	RNA polymerase
MSTRG.1090.1	ko03021	Transcription machinery
MSTRG.1090.1	ko03036	Chromosome and associated proteins
MSTRG.1090.1	ko03400	DNA repair and recombination proteins
MSTRG.1090.1	ko04131	Membrane trafficking
MSTRG.1090.1	ko04147	Exosome
MSTRG.1098.2	ko03000	Transcription factors
MSTRG.1112.1	ko04120	Ubiquitin mediated proteolysis
MSTRG.1112.1	ko04121	Ubiquitin system
MSTRG.1146.1	ko00020	Citrate cycle (TCA cycle)
MSTRG.1146.1	ko00190	Oxidative phosphorylation
MSTRG.1146.2	ko00020	Citrate cycle (TCA cycle)
MSTRG.1146.2	ko00190	Oxidative phosphorylation
MSTRG.1158.2	ko03040	Spliceosome
MSTRG.1158.2	ko03041	Spliceosome
MSTRG.1158.3	ko03040	Spliceosome
MSTRG.1158.3	ko03041	Spliceosome
MSTRG.1158.4	ko03040	Spliceosome
MSTRG.1158.4	ko03041	Spliceosome
MSTRG.1158.5	ko03040	Spliceosome
MSTRG.1158.5	ko03041	Spliceosome
MSTRG.1158.6	ko03040	Spliceosome
MSTRG.1158.6	ko03041	Spliceosome
MSTRG.1158.7	ko03040	Spliceosome
MSTRG.1158.7	ko03041	Spliceosome
MSTRG.1161.1	ko01002	Peptidases and inhibitors
MSTRG.116.3	ko03012	Translation factors
MSTRG.1166.1	ko00510	N-Glycan biosynthesis
MSTRG.1166.1	ko00513	Various types of N-glycan biosynthesis
MSTRG.1166.1	ko04141	Protein processing in endoplasmic reticulum
MSTRG.1171.1	ko03110	Chaperones and folding catalysts
MSTRG.1171.1	ko04147	Exosome
MSTRG.1179.2	ko00630	Glyoxylate and dicarboxylate metabolism
MSTRG.1179.2	ko00710	Carbon fixation in photosynthetic organisms
MSTRG.1190.1	ko00670	One carbon pool by folate
MSTRG.1192.1	ko03010	Ribosome
MSTRG.1192.1	ko03011	Ribosome
MSTRG.1193.1	ko03019	Messenger RNA biogenesis
MSTRG.1193.1	ko03029	Mitochondrial biogenesis
MSTRG.1193.1	ko04131	Membrane trafficking
MSTRG.1193.1	ko04812	Cytoskeleton proteins
MSTRG.1.1	ko00520	Amino sugar and nucleotide sugar metabolism
MSTRG.1.1	ko01003	Glycosyltransferases
MSTRG.1236.1	ko00190	Oxidative phosphorylation
MSTRG.1236.1	ko00970	Aminoacyl-tRNA biosynthesis
MSTRG.1236.1	ko03100	Non-coding RNAs
MSTRG.1240.1	ko03019	Messenger RNA biogenesis
MSTRG.1240.1	ko03021	Transcription machinery
MSTRG.1240.2	ko03019	Messenger RNA biogenesis
MSTRG.1240.2	ko03021	Transcription machinery
MSTRG.1247.1	ko03000	Transcription factors
MSTRG.1247.1	ko03029	Mitochondrial biogenesis
MSTRG.1247.1	ko03036	Chromosome and associated proteins
MSTRG.1260.1	ko03000	Transcription factors
MSTRG.1265.1	ko00061	Fatty acid biosynthesis
MSTRG.1265.1	ko00620	Pyruvate metabolism
MSTRG.1265.1	ko00640	Propanoate metabolism
MSTRG.1280.1	ko03016	Transfer RNA biogenesis
MSTRG.1280.1	ko03018	RNA degradation
MSTRG.1280.1	ko03019	Messenger RNA biogenesis
MSTRG.1319.2	ko03020	RNA polymerase
MSTRG.1319.2	ko03021	Transcription machinery
MSTRG.1333.1	ko99980	Enzymes with EC numbers
MSTRG.1336.1	ko00250	Alanine, aspartate and glutamate metabolism
MSTRG.1336.1	ko00410	beta-Alanine metabolism
MSTRG.1336.1	ko00430	Taurine and hypotaurine metabolism
MSTRG.1336.1	ko00650	Butanoate metabolism
MSTRG.1337.2	ko03012	Translation factors
MSTRG.1337.2	ko03015	mRNA surveillance pathway
MSTRG.1337.2	ko03019	Messenger RNA biogenesis
MSTRG.1337.3	ko03012	Translation factors
MSTRG.1337.3	ko03015	mRNA surveillance pathway
MSTRG.1337.3	ko03019	Messenger RNA biogenesis
MSTRG.1338.1	ko01002	Peptidases and inhibitors
MSTRG.1338.1	ko04131	Membrane trafficking
MSTRG.1355.1	ko02000	Transporters
MSTRG.1356.1	ko03036	Chromosome and associated proteins
MSTRG.1356.1	ko04812	Cytoskeleton proteins
MSTRG.1369.1	ko99980	Enzymes with EC numbers
MSTRG.1372.1	ko03013	Nucleocytoplasmic transport
MSTRG.1372.1	ko03019	Messenger RNA biogenesis
MSTRG.1372.1	ko03040	Spliceosome
MSTRG.1372.1	ko03041	Spliceosome
MSTRG.139.1	ko00620	Pyruvate metabolism
MSTRG.139.2	ko00620	Pyruvate metabolism
MSTRG.1395.1	ko03036	Chromosome and associated proteins
MSTRG.1395.2	ko03036	Chromosome and associated proteins
MSTRG.140.1	ko03029	Mitochondrial biogenesis
MSTRG.140.1	ko04121	Ubiquitin system
MSTRG.140.1	ko04131	Membrane trafficking
MSTRG.140.1	ko04136	Autophagy - other
MSTRG.1403.1	ko03400	DNA repair and recombination proteins
MSTRG.140.3	ko03029	Mitochondrial biogenesis
MSTRG.140.3	ko04121	Ubiquitin system
MSTRG.140.3	ko04131	Membrane trafficking
MSTRG.140.3	ko04136	Autophagy - other
MSTRG.1417.1	ko03020	RNA polymerase
MSTRG.1417.1	ko03021	Transcription machinery
MSTRG.1417.2	ko03020	RNA polymerase
MSTRG.1417.2	ko03021	Transcription machinery
MSTRG.1428.1	ko00010	Glycolysis / Gluconeogenesis
MSTRG.1428.1	ko00030	Pentose phosphate pathway
MSTRG.1428.1	ko00052	Galactose metabolism
MSTRG.1428.1	ko00230	Purine metabolism
MSTRG.1428.1	ko00500	Starch and sucrose metabolism
MSTRG.1428.1	ko00520	Amino sugar and nucleotide sugar metabolism
MSTRG.14.4	ko99980	Enzymes with EC numbers
MSTRG.1459.1	ko00194	Photosynthesis proteins
MSTRG.1459.1	ko00195	Photosynthesis
MSTRG.14.5	ko99980	Enzymes with EC numbers
MSTRG.1463.1	ko00760	Nicotinate and nicotinamide metabolism
MSTRG.1465.1	ko00562	Inositol phosphate metabolism
MSTRG.1465.1	ko04070	Phosphatidylinositol signaling system
MSTRG.1465.1	ko04131	Membrane trafficking
MSTRG.1465.1	ko04145	Phagosome
MSTRG.1479.1	ko99980	Enzymes with EC numbers
MSTRG.1488.1	ko00190	Oxidative phosphorylation
MSTRG.1495.1	ko00564	Glycerophospholipid metabolism
MSTRG.1498.1	ko03018	RNA degradation
MSTRG.1498.1	ko03019	Messenger RNA biogenesis
MSTRG.1501.1	ko00561	Glycerolipid metabolism
MSTRG.1501.1	ko00564	Glycerophospholipid metabolism
MSTRG.1505.1	ko03016	Transfer RNA biogenesis
MSTRG.1505.1	ko03036	Chromosome and associated proteins
MSTRG.1530.1	ko00260	Glycine, serine and threonine metabolism
MSTRG.1530.1	ko00400	Phenylalanine, tyrosine and tryptophan biosynthesis
MSTRG.1536.1	ko99980	Enzymes with EC numbers
MSTRG.1546.3	ko01009	Protein phosphatases and associated proteins
MSTRG.1546.3	ko03015	mRNA surveillance pathway
MSTRG.1546.3	ko03019	Messenger RNA biogenesis
MSTRG.1546.3	ko03036	Chromosome and associated proteins
MSTRG.1546.4	ko01009	Protein phosphatases and associated proteins
MSTRG.1546.4	ko03015	mRNA surveillance pathway
MSTRG.1546.4	ko03019	Messenger RNA biogenesis
MSTRG.1546.4	ko03036	Chromosome and associated proteins
MSTRG.1560.1	ko03019	Messenger RNA biogenesis
MSTRG.1562.1	ko03041	Spliceosome
MSTRG.1564.1	ko02000	Transporters
MSTRG.1573.1	ko99980	Enzymes with EC numbers
MSTRG.1575.1	ko00270	Cysteine and methionine metabolism
MSTRG.1575.1	ko00330	Arginine and proline metabolism
MSTRG.1577.1	ko01001	Protein kinases
MSTRG.1577.1	ko04016	MAPK signaling pathway - plant
MSTRG.1577.1	ko04075	Plant hormone signal transduction
MSTRG.1577.1	ko04626	Plant-pathogen interaction
MSTRG.1587.1	ko00240	Pyrimidine metabolism
MSTRG.1602.1	ko03029	Mitochondrial biogenesis
MSTRG.1602.3	ko03110	Chaperones and folding catalysts
MSTRG.1602.3	ko04141	Protein processing in endoplasmic reticulum
MSTRG.1602.3	ko04626	Plant-pathogen interaction
MSTRG.1610.2	ko03040	Spliceosome
MSTRG.1610.2	ko03041	Spliceosome
MSTRG.1619.2	ko03036	Chromosome and associated proteins
MSTRG.1619.2	ko04121	Ubiquitin system
MSTRG.1621.1	ko03400	DNA repair and recombination proteins
MSTRG.1621.1	ko04147	Exosome
MSTRG.1622.2	ko99999	Others
MSTRG.1622.3	ko99999	Others
MSTRG.1622.4	ko99999	Others
MSTRG.1625.2	ko99980	Enzymes with EC numbers
MSTRG.1625.3	ko99980	Enzymes with EC numbers
MSTRG.1629.1	ko00500	Starch and sucrose metabolism
MSTRG.163.1	ko01001	Protein kinases
MSTRG.1632.2	ko00190	Oxidative phosphorylation
MSTRG.1639.1	ko99995	Signaling proteins
MSTRG.1650.2	ko00900	Terpenoid backbone biosynthesis
MSTRG.1651.1	ko03012	Translation factors
MSTRG.1677.1	ko00230	Purine metabolism
MSTRG.1677.1	ko00240	Pyrimidine metabolism
MSTRG.1677.1	ko04090	CD molecules
MSTRG.1680.1	ko03010	Ribosome
MSTRG.1680.1	ko03011	Ribosome
MSTRG.168.1	ko99980	Enzymes with EC numbers
MSTRG.1687.2	ko03010	Ribosome
MSTRG.1687.2	ko03011	Ribosome
MSTRG.1695.1	ko02000	Transporters
MSTRG.1700.1	ko00500	Starch and sucrose metabolism
MSTRG.1700.2	ko00500	Starch and sucrose metabolism
MSTRG.1729.1	ko03009	Ribosome biogenesis
MSTRG.1729.1	ko99980	Enzymes with EC numbers
MSTRG.1731.1	ko00010	Glycolysis / Gluconeogenesis
MSTRG.1731.1	ko00020	Citrate cycle (TCA cycle)
MSTRG.1731.1	ko00620	Pyruvate metabolism
MSTRG.1749.1	ko00010	Glycolysis / Gluconeogenesis
MSTRG.1749.1	ko00052	Galactose metabolism
MSTRG.1749.1	ko03008	Ribosome biogenesis in eukaryotes
MSTRG.1749.1	ko03009	Ribosome biogenesis
MSTRG.1749.1	ko03012	Translation factors
MSTRG.1749.1	ko03018	RNA degradation
MSTRG.1749.1	ko03019	Messenger RNA biogenesis
MSTRG.1749.1	ko03029	Mitochondrial biogenesis
MSTRG.1749.1	ko04120	Ubiquitin mediated proteolysis
MSTRG.1749.1	ko04121	Ubiquitin system
MSTRG.1753.1	ko02000	Transporters
MSTRG.1757.1	ko00270	Cysteine and methionine metabolism
MSTRG.1757.1	ko00330	Arginine and proline metabolism
MSTRG.1757.1	ko00480	Glutathione metabolism
MSTRG.1757.2	ko00270	Cysteine and methionine metabolism
MSTRG.1757.2	ko00330	Arginine and proline metabolism
MSTRG.1757.2	ko00480	Glutathione metabolism
MSTRG.1766.1	ko03009	Ribosome biogenesis
MSTRG.1767.1	ko03000	Transcription factors
MSTRG.1767.1	ko03030	DNA replication
MSTRG.1767.1	ko03032	DNA replication proteins
MSTRG.1767.1	ko03400	DNA repair and recombination proteins
MSTRG.1767.1	ko03420	Nucleotide excision repair
MSTRG.1767.1	ko03430	Mismatch repair
MSTRG.1767.1	ko03440	Homologous recombination
MSTRG.1773.3	ko01009	Protein phosphatases and associated proteins
MSTRG.1776.1	ko04031	GTP-binding proteins
MSTRG.1776.1	ko04131	Membrane trafficking
MSTRG.1776.1	ko04144	Endocytosis
MSTRG.1776.1	ko04147	Exosome
MSTRG.1792.1	ko00220	Arginine biosynthesis
MSTRG.1792.1	ko00250	Alanine, aspartate and glutamate metabolism
MSTRG.1792.1	ko00260	Glycine, serine and threonine metabolism
MSTRG.1792.1	ko00630	Glyoxylate and dicarboxylate metabolism
MSTRG.1792.1	ko00710	Carbon fixation in photosynthetic organisms
MSTRG.1792.1	ko01007	Amino acid related enzymes
MSTRG.1796.1	ko02000	Transporters
MSTRG.1798.1	ko99980	Enzymes with EC numbers
MSTRG.1798.2	ko99980	Enzymes with EC numbers
MSTRG.1816.1	ko99980	Enzymes with EC numbers
MSTRG.1821.1	ko04131	Membrane trafficking
MSTRG.1822.1	ko01002	Peptidases and inhibitors
MSTRG.1856.2	ko01001	Protein kinases
MSTRG.1856.2	ko03041	Spliceosome
MSTRG.1856.3	ko01001	Protein kinases
MSTRG.1856.3	ko03041	Spliceosome
MSTRG.1856.5	ko01001	Protein kinases
MSTRG.1856.5	ko03041	Spliceosome
MSTRG.1857.1	ko00220	Arginine biosynthesis
MSTRG.1857.1	ko00230	Purine metabolism
MSTRG.1859.3	ko00190	Oxidative phosphorylation
MSTRG.1859.4	ko00190	Oxidative phosphorylation
MSTRG.1861.2	ko01002	Peptidases and inhibitors
MSTRG.1861.2	ko03050	Proteasome
MSTRG.1861.2	ko03051	Proteasome
MSTRG.1862.3	ko03060	Protein export
MSTRG.1865.1	ko00510	N-Glycan biosynthesis
MSTRG.1865.1	ko04141	Protein processing in endoplasmic reticulum
MSTRG.1865.1	ko04147	Exosome
MSTRG.1869.2	ko00194	Photosynthesis proteins
MSTRG.1869.2	ko00196	Photosynthesis - antenna proteins
MSTRG.1875.1	ko01009	Protein phosphatases and associated proteins
MSTRG.1875.1	ko03015	mRNA surveillance pathway
MSTRG.1875.1	ko03019	Messenger RNA biogenesis
MSTRG.1875.1	ko03021	Transcription machinery
MSTRG.1875.1	ko03041	Spliceosome
MSTRG.1886.1	ko03050	Proteasome
MSTRG.1886.1	ko03051	Proteasome
MSTRG.1886.2	ko03050	Proteasome
MSTRG.1886.2	ko03051	Proteasome
MSTRG.1886.3	ko03050	Proteasome
MSTRG.1886.3	ko03051	Proteasome
MSTRG.1897.1	ko03060	Protein export
MSTRG.1897.1	ko03110	Chaperones and folding catalysts
MSTRG.1897.1	ko04131	Membrane trafficking
MSTRG.1897.1	ko04141	Protein processing in endoplasmic reticulum
MSTRG.1897.1	ko04147	Exosome
MSTRG.1915.1	ko00591	Linoleic acid metabolism
MSTRG.1918.1	ko01002	Peptidases and inhibitors
MSTRG.1919.1	ko99980	Enzymes with EC numbers
MSTRG.1921.1	ko00061	Fatty acid biosynthesis
MSTRG.1921.1	ko00071	Fatty acid degradation
MSTRG.1921.1	ko01004	Lipid biosynthesis proteins
MSTRG.1921.1	ko04146	Peroxisome
MSTRG.1921.1	ko04147	Exosome
MSTRG.192.2	ko03020	RNA polymerase
MSTRG.192.2	ko03021	Transcription machinery
MSTRG.192.2	ko03400	DNA repair and recombination proteins
MSTRG.1924.1	ko03029	Mitochondrial biogenesis
MSTRG.1924.1	ko04031	GTP-binding proteins
MSTRG.1955.2	ko04131	Membrane trafficking
MSTRG.1979.1	ko03012	Translation factors
MSTRG.1984.2	ko03400	DNA repair and recombination proteins
MSTRG.1993.1	ko01001	Protein kinases
MSTRG.1993.1	ko01009	Protein phosphatases and associated proteins
MSTRG.1997.1	ko03010	Ribosome
MSTRG.1997.1	ko03011	Ribosome
MSTRG.1997.1	ko03036	Chromosome and associated proteins
MSTRG.1997.1	ko04120	Ubiquitin mediated proteolysis
MSTRG.1997.1	ko04121	Ubiquitin system
MSTRG.1997.1	ko04147	Exosome
MSTRG.1997.2	ko03010	Ribosome
MSTRG.1997.2	ko03011	Ribosome
MSTRG.1997.2	ko04120	Ubiquitin mediated proteolysis
MSTRG.1997.2	ko04121	Ubiquitin system
MSTRG.1997.2	ko04147	Exosome
MSTRG.2004.1	ko04131	Membrane trafficking
MSTRG.2004.1	ko04144	Endocytosis
MSTRG.2007.1	ko01001	Protein kinases
MSTRG.2028.1	ko04075	Plant hormone signal transduction
MSTRG.2029.1	ko03010	Ribosome
MSTRG.2029.1	ko03011	Ribosome
MSTRG.2035.1	ko03019	Messenger RNA biogenesis
MSTRG.2042.1	ko03018	RNA degradation
MSTRG.2042.1	ko03019	Messenger RNA biogenesis
MSTRG.2053.1	ko03400	DNA repair and recombination proteins
MSTRG.2055.2	ko03032	DNA replication proteins
MSTRG.2055.2	ko03400	DNA repair and recombination proteins
MSTRG.2055.3	ko03032	DNA replication proteins
MSTRG.2055.3	ko03400	DNA repair and recombination proteins
MSTRG.2070.1	ko03008	Ribosome biogenesis in eukaryotes
MSTRG.2070.1	ko03010	Ribosome
MSTRG.2070.1	ko03011	Ribosome
MSTRG.2070.1	ko03100	Non-coding RNAs
MSTRG.2072.1	ko03021	Transcription machinery
MSTRG.2073.1	ko03110	Chaperones and folding catalysts
MSTRG.2073.1	ko04141	Protein processing in endoplasmic reticulum
MSTRG.2073.1	ko04626	Plant-pathogen interaction
MSTRG.2080.1	ko03400	DNA repair and recombination proteins
MSTRG.2080.1	ko04131	Membrane trafficking
MSTRG.2080.1	ko04144	Endocytosis
MSTRG.209.1	ko03019	Messenger RNA biogenesis
MSTRG.2094.1	ko03010	Ribosome
MSTRG.2094.1	ko03011	Ribosome
MSTRG.2097.1	ko03040	Spliceosome
MSTRG.2097.1	ko03041	Spliceosome
MSTRG.2104.1	ko03016	Transfer RNA biogenesis
MSTRG.2106.1	ko03016	Transfer RNA biogenesis
MSTRG.2106.1	ko03036	Chromosome and associated proteins
MSTRG.2106.2	ko03016	Transfer RNA biogenesis
MSTRG.2106.2	ko03036	Chromosome and associated proteins
MSTRG.2129.2	ko00190	Oxidative phosphorylation
MSTRG.2139.1	ko01001	Protein kinases
MSTRG.2139.1	ko04075	Plant hormone signal transduction
MSTRG.214.1	ko04121	Ubiquitin system
MSTRG.2149.1	ko03008	Ribosome biogenesis in eukaryotes
MSTRG.2149.1	ko03010	Ribosome
MSTRG.2149.1	ko03011	Ribosome
MSTRG.2149.1	ko03100	Non-coding RNAs
MSTRG.215.1	ko03008	Ribosome biogenesis in eukaryotes
MSTRG.215.1	ko03009	Ribosome biogenesis
MSTRG.215.1	ko99980	Enzymes with EC numbers
MSTRG.2153.1	ko00073	Cutin, suberine and wax biosynthesis
MSTRG.2154.1	ko04131	Membrane trafficking
MSTRG.2154.1	ko04141	Protein processing in endoplasmic reticulum
MSTRG.2154.2	ko04131	Membrane trafficking
MSTRG.2154.2	ko04141	Protein processing in endoplasmic reticulum
MSTRG.2157.1	ko04131	Membrane trafficking
MSTRG.2157.1	ko04141	Protein processing in endoplasmic reticulum
MSTRG.216.1	ko03036	Chromosome and associated proteins
MSTRG.216.1	ko04812	Cytoskeleton proteins
MSTRG.2173.1	ko01002	Peptidases and inhibitors
MSTRG.2176.1	ko03010	Ribosome
MSTRG.2176.1	ko03011	Ribosome
MSTRG.2177.1	ko03008	Ribosome biogenesis in eukaryotes
MSTRG.2177.1	ko03009	Ribosome biogenesis
MSTRG.2177.1	ko03036	Chromosome and associated proteins
MSTRG.2177.1	ko04712	Circadian rhythm - plant
MSTRG.2179.1	ko04031	GTP-binding proteins
MSTRG.2179.1	ko04131	Membrane trafficking
MSTRG.2179.1	ko04145	Phagosome
MSTRG.2179.1	ko04147	Exosome
MSTRG.2189.1	ko04131	Membrane trafficking
MSTRG.2191.1	ko00190	Oxidative phosphorylation
MSTRG.2191.1	ko00194	Photosynthesis proteins
MSTRG.2191.1	ko00195	Photosynthesis
MSTRG.2197.1	ko00970	Aminoacyl-tRNA biosynthesis
MSTRG.2197.1	ko03016	Transfer RNA biogenesis
MSTRG.2221.1	ko03036	Chromosome and associated proteins
MSTRG.2223.1	ko03036	Chromosome and associated proteins
MSTRG.2223.1	ko03400	DNA repair and recombination proteins
MSTRG.2223.1	ko03410	Base excision repair
MSTRG.2223.1	ko04812	Cytoskeleton proteins
MSTRG.2232.1	ko03036	Chromosome and associated proteins
MSTRG.2232.1	ko03110	Chaperones and folding catalysts
MSTRG.2232.1	ko04147	Exosome
MSTRG.2249.1	ko04812	Cytoskeleton proteins
MSTRG.2259.1	ko03010	Ribosome
MSTRG.2259.1	ko03011	Ribosome
MSTRG.2286.1	ko00520	Amino sugar and nucleotide sugar metabolism
MSTRG.2286.1	ko01003	Glycosyltransferases
MSTRG.2286.2	ko00520	Amino sugar and nucleotide sugar metabolism
MSTRG.2286.2	ko01003	Glycosyltransferases
MSTRG.2287.2	ko00051	Fructose and mannose metabolism
MSTRG.2287.2	ko00500	Starch and sucrose metabolism
MSTRG.2287.2	ko00520	Amino sugar and nucleotide sugar metabolism
MSTRG.2302.1	ko99980	Enzymes with EC numbers
MSTRG.2310.1	ko99980	Enzymes with EC numbers
MSTRG.2312.1	ko03000	Transcription factors
MSTRG.2315.1	ko02044	Secretion system
MSTRG.2315.1	ko03060	Protein export
MSTRG.2322.1	ko00620	Pyruvate metabolism
MSTRG.2322.1	ko00710	Carbon fixation in photosynthetic organisms
MSTRG.2329.1	ko03018	RNA degradation
MSTRG.2329.1	ko03019	Messenger RNA biogenesis
MSTRG.2329.1	ko03036	Chromosome and associated proteins
MSTRG.2333.1	ko04131	Membrane trafficking
MSTRG.2333.1	ko04147	Exosome
MSTRG.2333.1	ko04812	Cytoskeleton proteins
MSTRG.2345.1	ko00500	Starch and sucrose metabolism
MSTRG.2351.1	ko00561	Glycerolipid metabolism
MSTRG.2351.1	ko00564	Glycerophospholipid metabolism
MSTRG.2351.1	ko01004	Lipid biosynthesis proteins
MSTRG.2386.1	ko01003	Glycosyltransferases
MSTRG.2393.1	ko03012	Translation factors
MSTRG.2396.1	ko03000	Transcription factors
MSTRG.2397.1	ko03018	RNA degradation
MSTRG.2397.1	ko03019	Messenger RNA biogenesis
MSTRG.2399.2	ko04120	Ubiquitin mediated proteolysis
MSTRG.2399.2	ko04121	Ubiquitin system
MSTRG.2399.2	ko04141	Protein processing in endoplasmic reticulum
MSTRG.2399.3	ko04120	Ubiquitin mediated proteolysis
MSTRG.2399.3	ko04121	Ubiquitin system
MSTRG.2399.3	ko04141	Protein processing in endoplasmic reticulum
MSTRG.2399.4	ko04120	Ubiquitin mediated proteolysis
MSTRG.2399.4	ko04121	Ubiquitin system
MSTRG.2399.4	ko04141	Protein processing in endoplasmic reticulum
MSTRG.2400.2	ko02000	Transporters
MSTRG.2403.1	ko04075	Plant hormone signal transduction
MSTRG.2413.4	ko04091	Lectins
MSTRG.2421.1	ko04120	Ubiquitin mediated proteolysis
MSTRG.2421.1	ko04121	Ubiquitin system
MSTRG.2436.2	ko00520	Amino sugar and nucleotide sugar metabolism
MSTRG.2442.1	ko03010	Ribosome
MSTRG.2442.1	ko03011	Ribosome
MSTRG.2442.1	ko04120	Ubiquitin mediated proteolysis
MSTRG.2442.1	ko04121	Ubiquitin system
MSTRG.2442.1	ko04147	Exosome
MSTRG.2445.1	ko00062	Fatty acid elongation
MSTRG.2445.1	ko04626	Plant-pathogen interaction
MSTRG.2449.1	ko00010	Glycolysis / Gluconeogenesis
MSTRG.2449.1	ko00020	Citrate cycle (TCA cycle)
MSTRG.2449.1	ko00620	Pyruvate metabolism
MSTRG.2449.2	ko00010	Glycolysis / Gluconeogenesis
MSTRG.2449.2	ko00020	Citrate cycle (TCA cycle)
MSTRG.2449.2	ko00620	Pyruvate metabolism
MSTRG.2490.2	ko01009	Protein phosphatases and associated proteins
MSTRG.2490.2	ko03400	DNA repair and recombination proteins
MSTRG.2492.1	ko00790	Folate biosynthesis
MSTRG.2492.1	ko04122	Sulfur relay system
MSTRG.2499.1	ko01001	Protein kinases
MSTRG.2499.1	ko04131	Membrane trafficking
MSTRG.2501.1	ko01003	Glycosyltransferases
MSTRG.2501.2	ko01003	Glycosyltransferases
MSTRG.2508.1	ko03012	Translation factors
MSTRG.2508.2	ko03012	Translation factors
MSTRG.2516.1	ko00536	Glycosaminoglycan binding proteins
MSTRG.2516.1	ko01002	Peptidases and inhibitors
MSTRG.2516.1	ko03110	Chaperones and folding catalysts
MSTRG.2516.1	ko04147	Exosome
MSTRG.2520.2	ko02000	Transporters
MSTRG.2520.2	ko03029	Mitochondrial biogenesis
MSTRG.2530.1	ko99980	Enzymes with EC numbers
MSTRG.2541.1	ko00330	Arginine and proline metabolism
MSTRG.2541.1	ko00410	beta-Alanine metabolism
MSTRG.2542.1	ko00531	Glycosaminoglycan degradation
MSTRG.2542.1	ko04147	Exosome
MSTRG.2544.2	ko03040	Spliceosome
MSTRG.2544.2	ko03041	Spliceosome
MSTRG.2551.1	ko03008	Ribosome biogenesis in eukaryotes
MSTRG.2551.1	ko03009	Ribosome biogenesis
MSTRG.2552.1	ko03008	Ribosome biogenesis in eukaryotes
MSTRG.2552.1	ko03009	Ribosome biogenesis
MSTRG.2565.2	ko03400	DNA repair and recombination proteins
MSTRG.2569.1	ko00460	Cyanoamino acid metabolism
MSTRG.2569.1	ko00500	Starch and sucrose metabolism
MSTRG.2569.1	ko00940	Phenylpropanoid biosynthesis
MSTRG.2580.1	ko00230	Purine metabolism
MSTRG.2580.1	ko00240	Pyrimidine metabolism
MSTRG.2580.2	ko00230	Purine metabolism
MSTRG.2580.2	ko00240	Pyrimidine metabolism
MSTRG.2582.1	ko01002	Peptidases and inhibitors
MSTRG.2584.1	ko04131	Membrane trafficking
MSTRG.2587.2	ko02000	Transporters
MSTRG.2612.1	ko03008	Ribosome biogenesis in eukaryotes
MSTRG.2612.1	ko03010	Ribosome
MSTRG.2612.1	ko03011	Ribosome
MSTRG.2612.1	ko03100	Non-coding RNAs
MSTRG.2620.1	ko00230	Purine metabolism
MSTRG.2620.1	ko00232	Caffeine metabolism
MSTRG.2620.1	ko04146	Peroxisome
MSTRG.2620.1	ko04147	Exosome
MSTRG.2630.1	ko00020	Citrate cycle (TCA cycle)
MSTRG.2630.1	ko04147	Exosome
MSTRG.2633.1	ko99980	Enzymes with EC numbers
MSTRG.2652.1	ko01001	Protein kinases
MSTRG.2652.1	ko04016	MAPK signaling pathway - plant
MSTRG.2652.1	ko04075	Plant hormone signal transduction
MSTRG.2652.1	ko04626	Plant-pathogen interaction
MSTRG.2656.1	ko03029	Mitochondrial biogenesis
MSTRG.2672.1	ko00270	Cysteine and methionine metabolism
MSTRG.2672.1	ko00460	Cyanoamino acid metabolism
MSTRG.2672.1	ko00920	Sulfur metabolism
MSTRG.2676.1	ko00270	Cysteine and methionine metabolism
MSTRG.2676.1	ko00920	Sulfur metabolism
MSTRG.2726.1	ko00620	Pyruvate metabolism
MSTRG.2727.1	ko03110	Chaperones and folding catalysts
MSTRG.2727.1	ko04091	Lectins
MSTRG.2727.1	ko04141	Protein processing in endoplasmic reticulum
MSTRG.2727.1	ko04145	Phagosome
MSTRG.2728.1	ko01001	Protein kinases
MSTRG.2728.1	ko04016	MAPK signaling pathway - plant
MSTRG.2742.2	ko03036	Chromosome and associated proteins
MSTRG.2758.1	ko01001	Protein kinases
MSTRG.2758.1	ko04626	Plant-pathogen interaction
MSTRG.2758.2	ko01001	Protein kinases
MSTRG.2758.2	ko04626	Plant-pathogen interaction
MSTRG.2766.2	ko03019	Messenger RNA biogenesis
MSTRG.2774.1	ko03010	Ribosome
MSTRG.2774.1	ko03011	Ribosome
MSTRG.2776.1	ko03009	Ribosome biogenesis
MSTRG.2777.2	ko04131	Membrane trafficking
MSTRG.2779.1	ko04120	Ubiquitin mediated proteolysis
MSTRG.2779.1	ko04121	Ubiquitin system
MSTRG.2779.2	ko04120	Ubiquitin mediated proteolysis
MSTRG.2779.2	ko04121	Ubiquitin system
MSTRG.2788.1	ko99980	Enzymes with EC numbers
MSTRG.2790.1	ko01009	Protein phosphatases and associated proteins
MSTRG.2790.1	ko03008	Ribosome biogenesis in eukaryotes
MSTRG.2790.1	ko03009	Ribosome biogenesis
MSTRG.2795.1	ko00190	Oxidative phosphorylation
MSTRG.2798.1	ko00020	Citrate cycle (TCA cycle)
MSTRG.2798.1	ko04147	Exosome
MSTRG.2820.1	ko03013	Nucleocytoplasmic transport
MSTRG.2820.1	ko03036	Chromosome and associated proteins
MSTRG.2833.1	ko00564	Glycerophospholipid metabolism
MSTRG.2833.1	ko00565	Ether lipid metabolism
MSTRG.2833.1	ko04131	Membrane trafficking
MSTRG.2833.1	ko04144	Endocytosis
MSTRG.2838.1	ko00071	Fatty acid degradation
MSTRG.2838.1	ko00280	Valine, leucine and isoleucine degradation
MSTRG.2852.1	ko00071	Fatty acid degradation
MSTRG.2852.1	ko00592	alpha-Linolenic acid metabolism
MSTRG.2859.1	ko03036	Chromosome and associated proteins
MSTRG.2859.1	ko04812	Cytoskeleton proteins
MSTRG.2868.1	ko00970	Aminoacyl-tRNA biosynthesis
MSTRG.2868.1	ko01007	Amino acid related enzymes
MSTRG.2868.1	ko03016	Transfer RNA biogenesis
MSTRG.2884.1	ko01009	Protein phosphatases and associated proteins
MSTRG.2884.1	ko03015	mRNA surveillance pathway
MSTRG.2884.1	ko03019	Messenger RNA biogenesis
MSTRG.2884.1	ko03036	Chromosome and associated proteins
MSTRG.2884.2	ko01009	Protein phosphatases and associated proteins
MSTRG.2884.2	ko03015	mRNA surveillance pathway
MSTRG.2884.2	ko03019	Messenger RNA biogenesis
MSTRG.2884.2	ko03036	Chromosome and associated proteins
MSTRG.2887.1	ko03036	Chromosome and associated proteins
MSTRG.2887.1	ko04120	Ubiquitin mediated proteolysis
MSTRG.2887.1	ko04121	Ubiquitin system
MSTRG.2902.1	ko04146	Peroxisome
MSTRG.2904.1	ko00400	Phenylalanine, tyrosine and tryptophan biosynthesis
MSTRG.2904.2	ko00400	Phenylalanine, tyrosine and tryptophan biosynthesis
MSTRG.2921.1	ko00010	Glycolysis / Gluconeogenesis
MSTRG.2921.1	ko00620	Pyruvate metabolism
MSTRG.2921.1	ko00710	Carbon fixation in photosynthetic organisms
MSTRG.2925.1	ko03019	Messenger RNA biogenesis
MSTRG.2940.1	ko04131	Membrane trafficking
MSTRG.2970.1	ko00061	Fatty acid biosynthesis
MSTRG.2970.1	ko00071	Fatty acid degradation
MSTRG.2970.1	ko01004	Lipid biosynthesis proteins
MSTRG.2970.1	ko04146	Peroxisome
MSTRG.2970.1	ko04147	Exosome
MSTRG.2973.1	ko01001	Protein kinases
MSTRG.2973.1	ko01009	Protein phosphatases and associated proteins
MSTRG.2977.1	ko03010	Ribosome
MSTRG.2977.1	ko03011	Ribosome
MSTRG.2992.1	ko01002	Peptidases and inhibitors
MSTRG.2992.1	ko03050	Proteasome
MSTRG.2992.1	ko03051	Proteasome
MSTRG.3005.1	ko00270	Cysteine and methionine metabolism
MSTRG.3012.2	ko04131	Membrane trafficking
MSTRG.3017.1	ko03019	Messenger RNA biogenesis
MSTRG.3017.1	ko03036	Chromosome and associated proteins
MSTRG.3021.1	ko00062	Fatty acid elongation
MSTRG.3021.1	ko04626	Plant-pathogen interaction
MSTRG.3023.1	ko00053	Ascorbate and aldarate metabolism
MSTRG.3023.1	ko00520	Amino sugar and nucleotide sugar metabolism
MSTRG.3023.2	ko00053	Ascorbate and aldarate metabolism
MSTRG.3023.2	ko00520	Amino sugar and nucleotide sugar metabolism
MSTRG.3036.2	ko04091	Lectins
MSTRG.3036.2	ko04141	Protein processing in endoplasmic reticulum
MSTRG.3038.1	ko03010	Ribosome
MSTRG.3038.1	ko03011	Ribosome
MSTRG.3039.1	ko00564	Glycerophospholipid metabolism
MSTRG.3039.1	ko04070	Phosphatidylinositol signaling system
MSTRG.3057.1	ko03036	Chromosome and associated proteins
MSTRG.306.1	ko04031	GTP-binding proteins
MSTRG.306.1	ko04131	Membrane trafficking
MSTRG.306.1	ko04144	Endocytosis
MSTRG.306.1	ko04147	Exosome
MSTRG.3066.1	ko01009	Protein phosphatases and associated proteins
MSTRG.3066.1	ko03015	mRNA surveillance pathway
MSTRG.3066.1	ko03019	Messenger RNA biogenesis
MSTRG.3066.1	ko03021	Transcription machinery
MSTRG.3066.1	ko03041	Spliceosome
MSTRG.3080.1	ko01001	Protein kinases
MSTRG.3080.2	ko01001	Protein kinases
MSTRG.3081.1	ko01001	Protein kinases
MSTRG.3081.1	ko03036	Chromosome and associated proteins
MSTRG.3081.1	ko99980	Enzymes with EC numbers
MSTRG.3110.1	ko03040	Spliceosome
MSTRG.3110.1	ko03041	Spliceosome
MSTRG.3110.1	ko03400	DNA repair and recombination proteins
MSTRG.3110.1	ko04120	Ubiquitin mediated proteolysis
MSTRG.3110.1	ko04121	Ubiquitin system
MSTRG.3114.2	ko00290	Valine, leucine and isoleucine biosynthesis
MSTRG.3114.2	ko00660	C5-Branched dibasic acid metabolism
MSTRG.3114.2	ko00966	Glucosinolate biosynthesis
MSTRG.3115.1	ko00970	Aminoacyl-tRNA biosynthesis
MSTRG.3115.1	ko03029	Mitochondrial biogenesis
MSTRG.3132.1	ko00520	Amino sugar and nucleotide sugar metabolism
MSTRG.3132.2	ko00520	Amino sugar and nucleotide sugar metabolism
MSTRG.3160.1	ko03021	Transcription machinery
MSTRG.3160.1	ko03036	Chromosome and associated proteins
MSTRG.3160.1	ko03040	Spliceosome
MSTRG.3160.1	ko03041	Spliceosome
MSTRG.3165.1	ko03009	Ribosome biogenesis
MSTRG.3175.1	ko01001	Protein kinases
MSTRG.3175.1	ko04016	MAPK signaling pathway - plant
MSTRG.3187.1	ko03018	RNA degradation
MSTRG.3187.1	ko03019	Messenger RNA biogenesis
MSTRG.3193.1	ko01004	Lipid biosynthesis proteins
MSTRG.3193.1	ko01040	Biosynthesis of unsaturated fatty acids
MSTRG.3214.2	ko03009	Ribosome biogenesis
MSTRG.3220.1	ko03036	Chromosome and associated proteins
MSTRG.3238.2	ko01001	Protein kinases
MSTRG.3238.2	ko03036	Chromosome and associated proteins
MSTRG.3238.2	ko03400	DNA repair and recombination proteins
MSTRG.3244.1	ko00561	Glycerolipid metabolism
MSTRG.3244.1	ko00564	Glycerophospholipid metabolism
MSTRG.3244.1	ko01004	Lipid biosynthesis proteins
MSTRG.3256.1	ko00230	Purine metabolism
MSTRG.3272.1	ko01002	Peptidases and inhibitors
MSTRG.3273.1	ko00860	Porphyrin and chlorophyll metabolism
MSTRG.3277.1	ko01002	Peptidases and inhibitors
MSTRG.3277.3	ko01002	Peptidases and inhibitors
MSTRG.3282.1	ko00450	Selenocompound metabolism
MSTRG.3284.2	ko02000	Transporters
MSTRG.3284.2	ko02010	ABC transporters
MSTRG.3285.1	ko03021	Transcription machinery
MSTRG.3285.1	ko03022	Basal transcription factors
MSTRG.3292.1	ko03021	Transcription machinery
MSTRG.3292.1	ko03022	Basal transcription factors
MSTRG.3295.1	ko03013	Nucleocytoplasmic transport
MSTRG.3295.1	ko03019	Messenger RNA biogenesis
MSTRG.3297.1	ko03009	Ribosome biogenesis
MSTRG.3297.1	ko03040	Spliceosome
MSTRG.3297.1	ko03041	Spliceosome
MSTRG.3306.1	ko00564	Glycerophospholipid metabolism
MSTRG.3310.1	ko04626	Plant-pathogen interaction
MSTRG.3311.1	ko03012	Translation factors
MSTRG.3311.1	ko03051	Proteasome
MSTRG.3311.1	ko04147	Exosome
MSTRG.3312.1	ko03036	Chromosome and associated proteins
MSTRG.3323.1	ko00510	N-Glycan biosynthesis
MSTRG.3323.1	ko01003	Glycosyltransferases
MSTRG.3369.1	ko00250	Alanine, aspartate and glutamate metabolism
MSTRG.3369.1	ko00630	Glyoxylate and dicarboxylate metabolism
MSTRG.3369.1	ko00910	Nitrogen metabolism
MSTRG.3369.1	ko01002	Peptidases and inhibitors
MSTRG.3369.2	ko00250	Alanine, aspartate and glutamate metabolism
MSTRG.3369.2	ko00630	Glyoxylate and dicarboxylate metabolism
MSTRG.3369.2	ko00910	Nitrogen metabolism
MSTRG.3369.2	ko01002	Peptidases and inhibitors
MSTRG.337.1	ko03040	Spliceosome
MSTRG.337.1	ko03041	Spliceosome
MSTRG.3378.1	ko00500	Starch and sucrose metabolism
MSTRG.3384.1	ko03029	Mitochondrial biogenesis
MSTRG.3388.1	ko00230	Purine metabolism
MSTRG.3394.1	ko03050	Proteasome
MSTRG.3394.1	ko03051	Proteasome
MSTRG.3399.1	ko01003	Glycosyltransferases
MSTRG.3401.3	ko03041	Spliceosome
MSTRG.3403.1	ko00970	Aminoacyl-tRNA biosynthesis
MSTRG.3403.1	ko01007	Amino acid related enzymes
MSTRG.3403.1	ko03016	Transfer RNA biogenesis
MSTRG.3435.2	ko03008	Ribosome biogenesis in eukaryotes
MSTRG.3435.2	ko03010	Ribosome
MSTRG.3435.2	ko03011	Ribosome
MSTRG.3435.2	ko03100	Non-coding RNAs
MSTRG.3441.1	ko04121	Ubiquitin system
MSTRG.3441.1	ko04146	Peroxisome
MSTRG.3449.1	ko00500	Starch and sucrose metabolism
MSTRG.3449.2	ko00500	Starch and sucrose metabolism
MSTRG.3451.1	ko03009	Ribosome biogenesis
MSTRG.3451.1	ko03040	Spliceosome
MSTRG.3451.1	ko03041	Spliceosome
MSTRG.3451.2	ko03009	Ribosome biogenesis
MSTRG.3451.2	ko03040	Spliceosome
MSTRG.3451.2	ko03041	Spliceosome
MSTRG.3452.1	ko03021	Transcription machinery
MSTRG.3452.1	ko03036	Chromosome and associated proteins
MSTRG.3461.1	ko04131	Membrane trafficking
MSTRG.3461.1	ko04141	Protein processing in endoplasmic reticulum
MSTRG.3464.1	ko03018	RNA degradation
MSTRG.3464.1	ko03019	Messenger RNA biogenesis
MSTRG.3466.1	ko03009	Ribosome biogenesis
MSTRG.3482.1	ko02000	Transporters
MSTRG.3485.1	ko03036	Chromosome and associated proteins
MSTRG.3493.2	ko02000	Transporters
MSTRG.3496.2	ko00520	Amino sugar and nucleotide sugar metabolism
MSTRG.3497.1	ko03012	Translation factors
MSTRG.3497.1	ko03029	Mitochondrial biogenesis
MSTRG.3498.2	ko00310	Lysine degradation
MSTRG.3498.2	ko02000	Transporters
MSTRG.3498.2	ko03036	Chromosome and associated proteins
MSTRG.3501.1	ko03018	RNA degradation
MSTRG.3501.1	ko03019	Messenger RNA biogenesis
MSTRG.3507.2	ko00260	Glycine, serine and threonine metabolism
MSTRG.3507.2	ko00460	Cyanoamino acid metabolism
MSTRG.3507.2	ko00630	Glyoxylate and dicarboxylate metabolism
MSTRG.3507.2	ko00670	One carbon pool by folate
MSTRG.3514.1	ko04131	Membrane trafficking
MSTRG.3514.1	ko99980	Enzymes with EC numbers
MSTRG.3514.2	ko04131	Membrane trafficking
MSTRG.3514.2	ko99980	Enzymes with EC numbers
MSTRG.3536.1	ko03010	Ribosome
MSTRG.3536.1	ko03011	Ribosome
MSTRG.3549.1	ko03020	RNA polymerase
MSTRG.3549.1	ko03021	Transcription machinery
MSTRG.3549.1	ko03040	Spliceosome
MSTRG.3549.1	ko03041	Spliceosome
MSTRG.3549.1	ko03400	DNA repair and recombination proteins
MSTRG.3549.1	ko04121	Ubiquitin system
MSTRG.355.1	ko99995	Signaling proteins
MSTRG.3552.1	ko00500	Starch and sucrose metabolism
MSTRG.3561.1	ko00100	Steroid biosynthesis
MSTRG.3561.1	ko00909	Sesquiterpenoid and triterpenoid biosynthesis
MSTRG.3566.1	ko00520	Amino sugar and nucleotide sugar metabolism
MSTRG.357.1	ko04040	Ion channels
MSTRG.3583.1	ko00500	Starch and sucrose metabolism
MSTRG.3583.1	ko00537	Glycosylphosphatidylinositol (GPI)-anchored proteins
MSTRG.3585.1	ko00010	Glycolysis / Gluconeogenesis
MSTRG.3585.1	ko00030	Pentose phosphate pathway
MSTRG.3585.1	ko00051	Fructose and mannose metabolism
MSTRG.3585.1	ko00052	Galactose metabolism
MSTRG.3585.1	ko01009	Protein phosphatases and associated proteins
MSTRG.3585.1	ko03018	RNA degradation
MSTRG.3585.1	ko03019	Messenger RNA biogenesis
MSTRG.3601.3	ko00190	Oxidative phosphorylation
MSTRG.3614.1	ko00010	Glycolysis / Gluconeogenesis
MSTRG.3614.1	ko00030	Pentose phosphate pathway
MSTRG.3624.1	ko03012	Translation factors
MSTRG.3626.1	ko00480	Glutathione metabolism
MSTRG.3626.1	ko01002	Peptidases and inhibitors
MSTRG.3630.3	ko04147	Exosome
MSTRG.3631.1	ko04040	Ion channels
MSTRG.3631.1	ko04626	Plant-pathogen interaction
MSTRG.3631.2	ko04040	Ion channels
MSTRG.3631.2	ko04626	Plant-pathogen interaction
MSTRG.363.1	ko99980	Enzymes with EC numbers
MSTRG.3640.1	ko01009	Protein phosphatases and associated proteins
MSTRG.3640.1	ko03009	Ribosome biogenesis
MSTRG.3640.1	ko03029	Mitochondrial biogenesis
MSTRG.3640.1	ko03040	Spliceosome
MSTRG.3640.1	ko03041	Spliceosome
MSTRG.3640.1	ko03051	Proteasome
MSTRG.3640.1	ko03110	Chaperones and folding catalysts
MSTRG.3640.1	ko04131	Membrane trafficking
MSTRG.3640.1	ko04141	Protein processing in endoplasmic reticulum
MSTRG.3640.1	ko04144	Endocytosis
MSTRG.3640.1	ko04147	Exosome
MSTRG.3641.1	ko03012	Translation factors
MSTRG.3641.1	ko03019	Messenger RNA biogenesis
MSTRG.3667.1	ko00230	Purine metabolism
MSTRG.3667.1	ko00240	Pyrimidine metabolism
MSTRG.3667.1	ko03036	Chromosome and associated proteins
MSTRG.3667.1	ko04812	Cytoskeleton proteins
MSTRG.3669.1	ko00190	Oxidative phosphorylation
MSTRG.3696.1	ko00040	Pentose and glucuronate interconversions
MSTRG.3696.1	ko00051	Fructose and mannose metabolism
MSTRG.3696.2	ko00040	Pentose and glucuronate interconversions
MSTRG.3696.2	ko00051	Fructose and mannose metabolism
MSTRG.3715.1	ko03000	Transcription factors
MSTRG.37.1	ko03015	mRNA surveillance pathway
MSTRG.37.1	ko03019	Messenger RNA biogenesis
MSTRG.3737.1	ko04147	Exosome
MSTRG.3737.1	ko04812	Cytoskeleton proteins
MSTRG.3740.1	ko04131	Membrane trafficking
MSTRG.3742.1	ko00562	Inositol phosphate metabolism
MSTRG.3742.1	ko04070	Phosphatidylinositol signaling system
MSTRG.3742.1	ko04131	Membrane trafficking
MSTRG.3742.1	ko04145	Phagosome
MSTRG.3752.1	ko03009	Ribosome biogenesis
MSTRG.3758.1	ko00061	Fatty acid biosynthesis
MSTRG.3758.1	ko00780	Biotin metabolism
MSTRG.3758.1	ko01004	Lipid biosynthesis proteins
MSTRG.3758.2	ko00061	Fatty acid biosynthesis
MSTRG.3758.2	ko00780	Biotin metabolism
MSTRG.3758.2	ko01004	Lipid biosynthesis proteins
MSTRG.3763.1	ko03000	Transcription factors
MSTRG.3763.1	ko03019	Messenger RNA biogenesis
MSTRG.3763.1	ko03032	DNA replication proteins
MSTRG.3765.2	ko00500	Starch and sucrose metabolism
MSTRG.3765.2	ko01003	Glycosyltransferases
MSTRG.3765.3	ko00500	Starch and sucrose metabolism
MSTRG.3765.3	ko01003	Glycosyltransferases
MSTRG.3765.4	ko00500	Starch and sucrose metabolism
MSTRG.3765.4	ko01003	Glycosyltransferases
MSTRG.3766.2	ko04091	Lectins
MSTRG.3766.2	ko04141	Protein processing in endoplasmic reticulum
MSTRG.377.2	ko03010	Ribosome
MSTRG.377.2	ko03011	Ribosome
MSTRG.3777.1	ko03018	RNA degradation
MSTRG.3777.1	ko03019	Messenger RNA biogenesis
MSTRG.3777.1	ko03029	Mitochondrial biogenesis
MSTRG.3777.1	ko03110	Chaperones and folding catalysts
MSTRG.3777.1	ko04147	Exosome
MSTRG.3777.2	ko03018	RNA degradation
MSTRG.3777.2	ko03019	Messenger RNA biogenesis
MSTRG.3777.2	ko03029	Mitochondrial biogenesis
MSTRG.3777.2	ko03110	Chaperones and folding catalysts
MSTRG.3777.2	ko04147	Exosome
MSTRG.3777.3	ko03018	RNA degradation
MSTRG.3777.3	ko03019	Messenger RNA biogenesis
MSTRG.3777.3	ko03029	Mitochondrial biogenesis
MSTRG.3777.3	ko03110	Chaperones and folding catalysts
MSTRG.3777.3	ko04147	Exosome
MSTRG.3779.1	ko00280	Valine, leucine and isoleucine degradation
MSTRG.3779.1	ko00640	Propanoate metabolism
MSTRG.378.1	ko99975	Protein processing
MSTRG.3786.1	ko01002	Peptidases and inhibitors
MSTRG.3788.1	ko02000	Transporters
MSTRG.3792.1	ko03009	Ribosome biogenesis
MSTRG.3792.1	ko03013	Nucleocytoplasmic transport
MSTRG.3802.1	ko04120	Ubiquitin mediated proteolysis
MSTRG.3802.1	ko04121	Ubiquitin system
MSTRG.3804.1	ko03040	Spliceosome
MSTRG.3804.1	ko03041	Spliceosome
MSTRG.3836.1	ko01009	Protein phosphatases and associated proteins
MSTRG.3836.1	ko03015	mRNA surveillance pathway
MSTRG.3836.1	ko03019	Messenger RNA biogenesis
MSTRG.3836.1	ko03036	Chromosome and associated proteins
MSTRG.3836.1	ko04131	Membrane trafficking
MSTRG.3836.1	ko04136	Autophagy - other
MSTRG.3836.1	ko04147	Exosome
MSTRG.384.1	ko00510	N-Glycan biosynthesis
MSTRG.384.1	ko00513	Various types of N-glycan biosynthesis
MSTRG.384.1	ko04131	Membrane trafficking
MSTRG.384.1	ko04141	Protein processing in endoplasmic reticulum
MSTRG.384.2	ko00510	N-Glycan biosynthesis
MSTRG.384.2	ko00513	Various types of N-glycan biosynthesis
MSTRG.384.2	ko04131	Membrane trafficking
MSTRG.384.2	ko04141	Protein processing in endoplasmic reticulum
MSTRG.3857.1	ko03010	Ribosome
MSTRG.3857.1	ko03011	Ribosome
MSTRG.3860.1	ko01003	Glycosyltransferases
MSTRG.3863.2	ko01003	Glycosyltransferases
MSTRG.3882.1	ko03032	DNA replication proteins
MSTRG.3886.1	ko03000	Transcription factors
MSTRG.3886.1	ko04016	MAPK signaling pathway - plant
MSTRG.3886.1	ko04075	Plant hormone signal transduction
MSTRG.3904.1	ko01001	Protein kinases
MSTRG.3904.1	ko04626	Plant-pathogen interaction
MSTRG.3908.1	ko00860	Porphyrin and chlorophyll metabolism
MSTRG.3916.2	ko00920	Sulfur metabolism
MSTRG.3945.1	ko01002	Peptidases and inhibitors
MSTRG.3945.2	ko01002	Peptidases and inhibitors
MSTRG.3952.1	ko01002	Peptidases and inhibitors
MSTRG.3952.1	ko03050	Proteasome
MSTRG.3952.1	ko03051	Proteasome
MSTRG.3962.1	ko03021	Transcription machinery
MSTRG.3962.1	ko03022	Basal transcription factors
MSTRG.3962.1	ko03400	DNA repair and recombination proteins
MSTRG.3962.1	ko03420	Nucleotide excision repair
MSTRG.3967.1	ko00280	Valine, leucine and isoleucine degradation
MSTRG.397.1	ko03019	Messenger RNA biogenesis
MSTRG.3972.1	ko03051	Proteasome
MSTRG.3996.1	ko01001	Protein kinases
MSTRG.3996.2	ko01001	Protein kinases
MSTRG.4020.1	ko00380	Tryptophan metabolism
MSTRG.4020.1	ko00906	Carotenoid biosynthesis
MSTRG.4021.1	ko00380	Tryptophan metabolism
MSTRG.4021.1	ko00906	Carotenoid biosynthesis
MSTRG.4022.2	ko00460	Cyanoamino acid metabolism
MSTRG.4022.2	ko00500	Starch and sucrose metabolism
MSTRG.4022.2	ko00940	Phenylpropanoid biosynthesis
MSTRG.4030.1	ko01001	Protein kinases
MSTRG.4039.1	ko03040	Spliceosome
MSTRG.4039.1	ko03041	Spliceosome
MSTRG.4047.1	ko00790	Folate biosynthesis
MSTRG.4050.1	ko03008	Ribosome biogenesis in eukaryotes
MSTRG.4050.1	ko03009	Ribosome biogenesis
MSTRG.4067.1	ko00061	Fatty acid biosynthesis
MSTRG.4067.1	ko00780	Biotin metabolism
MSTRG.4067.1	ko01004	Lipid biosynthesis proteins
MSTRG.4068.1	ko03400	DNA repair and recombination proteins
MSTRG.4068.1	ko03420	Nucleotide excision repair
MSTRG.4068.1	ko04120	Ubiquitin mediated proteolysis
MSTRG.4068.1	ko04121	Ubiquitin system
MSTRG.4068.1	ko04147	Exosome
MSTRG.4086.1	ko01003	Glycosyltransferases
MSTRG.4095.1	ko03036	Chromosome and associated proteins
MSTRG.4095.1	ko04120	Ubiquitin mediated proteolysis
MSTRG.4095.1	ko04121	Ubiquitin system
MSTRG.4097.1	ko00190	Oxidative phosphorylation
MSTRG.4105.1	ko00190	Oxidative phosphorylation
MSTRG.4105.2	ko00190	Oxidative phosphorylation
MSTRG.4114.1	ko00250	Alanine, aspartate and glutamate metabolism
MSTRG.4114.1	ko00330	Arginine and proline metabolism
MSTRG.4129.1	ko04131	Membrane trafficking
MSTRG.4130.2	ko03010	Ribosome
MSTRG.4130.2	ko03011	Ribosome
MSTRG.414.1	ko03400	DNA repair and recombination proteins
MSTRG.414.1	ko03420	Nucleotide excision repair
MSTRG.414.1	ko04120	Ubiquitin mediated proteolysis
MSTRG.414.1	ko04121	Ubiquitin system
MSTRG.414.2	ko03400	DNA repair and recombination proteins
MSTRG.414.2	ko03420	Nucleotide excision repair
MSTRG.414.2	ko04120	Ubiquitin mediated proteolysis
MSTRG.414.2	ko04121	Ubiquitin system
MSTRG.4159.1	ko00190	Oxidative phosphorylation
MSTRG.4165.1	ko00780	Biotin metabolism
MSTRG.4175.1	ko00030	Pentose phosphate pathway
MSTRG.4175.1	ko00040	Pentose and glucuronate interconversions
MSTRG.4175.1	ko00710	Carbon fixation in photosynthetic organisms
MSTRG.4183.1	ko01001	Protein kinases
MSTRG.4183.1	ko03029	Mitochondrial biogenesis
MSTRG.4183.1	ko04131	Membrane trafficking
MSTRG.4184.1	ko00190	Oxidative phosphorylation
MSTRG.4201.1	ko04131	Membrane trafficking
MSTRG.4215.1	ko03040	Spliceosome
MSTRG.4215.1	ko03041	Spliceosome
MSTRG.4215.2	ko03040	Spliceosome
MSTRG.4215.2	ko03041	Spliceosome
MSTRG.4217.1	ko00061	Fatty acid biosynthesis
MSTRG.4217.1	ko00254	Aflatoxin biosynthesis
MSTRG.4217.1	ko00620	Pyruvate metabolism
MSTRG.4217.1	ko00640	Propanoate metabolism
MSTRG.4217.2	ko00061	Fatty acid biosynthesis
MSTRG.4217.2	ko00254	Aflatoxin biosynthesis
MSTRG.4217.2	ko00620	Pyruvate metabolism
MSTRG.4217.2	ko00640	Propanoate metabolism
MSTRG.4221.1	ko00480	Glutathione metabolism
MSTRG.4221.1	ko00590	Arachidonic acid metabolism
MSTRG.4235.1	ko03041	Spliceosome
MSTRG.4236.1	ko01009	Protein phosphatases and associated proteins
MSTRG.4236.1	ko03400	DNA repair and recombination proteins
MSTRG.4244.1	ko01001	Protein kinases
MSTRG.4244.1	ko04016	MAPK signaling pathway - plant
MSTRG.4251.2	ko00052	Galactose metabolism
MSTRG.4251.2	ko00561	Glycerolipid metabolism
MSTRG.4251.2	ko00600	Sphingolipid metabolism
MSTRG.4251.2	ko00603	Glycosphingolipid biosynthesis - globo and isoglobo series
MSTRG.425.1	ko03040	Spliceosome
MSTRG.425.1	ko03041	Spliceosome
MSTRG.4253.1	ko00051	Fructose and mannose metabolism
MSTRG.4253.1	ko00520	Amino sugar and nucleotide sugar metabolism
MSTRG.4258.1	ko00750	Vitamin B6 metabolism
MSTRG.4275.2	ko04031	GTP-binding proteins
MSTRG.4275.2	ko04131	Membrane trafficking
MSTRG.4275.2	ko04145	Phagosome
MSTRG.4275.2	ko04147	Exosome
MSTRG.4286.1	ko04121	Ubiquitin system
MSTRG.429.1	ko00190	Oxidative phosphorylation
MSTRG.429.1	ko00194	Photosynthesis proteins
MSTRG.429.1	ko00195	Photosynthesis
MSTRG.429.1	ko01009	Protein phosphatases and associated proteins
MSTRG.429.1	ko03400	DNA repair and recombination proteins
MSTRG.4298.1	ko00900	Terpenoid backbone biosynthesis
MSTRG.4298.2	ko00900	Terpenoid backbone biosynthesis
MSTRG.4304.1	ko00770	Pantothenate and CoA biosynthesis
MSTRG.4304.1	ko99987	Cofactor metabolism
MSTRG.4313.1	ko04131	Membrane trafficking
MSTRG.4317.1	ko03009	Ribosome biogenesis
MSTRG.4317.1	ko03041	Spliceosome
MSTRG.432.1	ko00190	Oxidative phosphorylation
MSTRG.432.1	ko04145	Phagosome
MSTRG.4326.1	ko03009	Ribosome biogenesis
MSTRG.4326.1	ko03019	Messenger RNA biogenesis
MSTRG.4326.1	ko04131	Membrane trafficking
MSTRG.4326.1	ko04141	Protein processing in endoplasmic reticulum
MSTRG.4326.1	ko04147	Exosome
MSTRG.433.2	ko04131	Membrane trafficking
MSTRG.433.2	ko04144	Endocytosis
MSTRG.435.1	ko03000	Transcription factors
MSTRG.4358.1	ko00760	Nicotinate and nicotinamide metabolism
MSTRG.4363.3	ko99980	Enzymes with EC numbers
MSTRG.4364.1	ko00190	Oxidative phosphorylation
MSTRG.4366.1	ko04121	Ubiquitin system
MSTRG.4368.2	ko00970	Aminoacyl-tRNA biosynthesis
MSTRG.4368.2	ko01007	Amino acid related enzymes
MSTRG.4368.2	ko03016	Transfer RNA biogenesis
MSTRG.4371.1	ko99980	Enzymes with EC numbers
MSTRG.437.1	ko03036	Chromosome and associated proteins
MSTRG.437.1	ko04131	Membrane trafficking
MSTRG.4372.1	ko01002	Peptidases and inhibitors
MSTRG.4375.2	ko03036	Chromosome and associated proteins
MSTRG.4375.2	ko04121	Ubiquitin system
MSTRG.439.1	ko00194	Photosynthesis proteins
MSTRG.439.1	ko00195	Photosynthesis
MSTRG.4397.1	ko03013	Nucleocytoplasmic transport
MSTRG.4397.1	ko03019	Messenger RNA biogenesis
MSTRG.4399.1	ko03036	Chromosome and associated proteins
MSTRG.4399.1	ko04812	Cytoskeleton proteins
MSTRG.4409.1	ko03016	Transfer RNA biogenesis
MSTRG.4409.1	ko03036	Chromosome and associated proteins
MSTRG.4410.1	ko01001	Protein kinases
MSTRG.4454.1	ko00600	Sphingolipid metabolism
MSTRG.4454.1	ko01007	Amino acid related enzymes
MSTRG.4457.1	ko03010	Ribosome
MSTRG.4457.1	ko03011	Ribosome
MSTRG.447.2	ko00190	Oxidative phosphorylation
MSTRG.4482.3	ko00520	Amino sugar and nucleotide sugar metabolism
MSTRG.4483.1	ko03110	Chaperones and folding catalysts
MSTRG.4483.1	ko04141	Protein processing in endoplasmic reticulum
MSTRG.4485.1	ko00330	Arginine and proline metabolism
MSTRG.4485.1	ko00410	beta-Alanine metabolism
MSTRG.4485.1	ko00770	Pantothenate and CoA biosynthesis
MSTRG.4495.1	ko04131	Membrane trafficking
MSTRG.4512.1	ko00970	Aminoacyl-tRNA biosynthesis
MSTRG.4512.1	ko01007	Amino acid related enzymes
MSTRG.4512.1	ko03016	Transfer RNA biogenesis
MSTRG.4512.1	ko03036	Chromosome and associated proteins
MSTRG.4512.1	ko04812	Cytoskeleton proteins
MSTRG.4512.2	ko00970	Aminoacyl-tRNA biosynthesis
MSTRG.4512.2	ko01007	Amino acid related enzymes
MSTRG.4512.2	ko03016	Transfer RNA biogenesis
MSTRG.4512.2	ko03036	Chromosome and associated proteins
MSTRG.4512.2	ko04812	Cytoskeleton proteins
MSTRG.4542.1	ko03010	Ribosome
MSTRG.4542.1	ko03011	Ribosome
MSTRG.455.2	ko04131	Membrane trafficking
MSTRG.455.2	ko04147	Exosome
MSTRG.4564.1	ko00061	Fatty acid biosynthesis
MSTRG.4564.1	ko00071	Fatty acid degradation
MSTRG.4564.1	ko01004	Lipid biosynthesis proteins
MSTRG.4564.1	ko04146	Peroxisome
MSTRG.4564.1	ko04147	Exosome
MSTRG.4587.1	ko00970	Aminoacyl-tRNA biosynthesis
MSTRG.4587.1	ko01007	Amino acid related enzymes
MSTRG.4587.1	ko03016	Transfer RNA biogenesis
MSTRG.4597.2	ko03019	Messenger RNA biogenesis
MSTRG.4597.2	ko03036	Chromosome and associated proteins
MSTRG.4664.1	ko04121	Ubiquitin system
MSTRG.4670.1	ko02000	Transporters
MSTRG.4678.1	ko00940	Phenylpropanoid biosynthesis
MSTRG.4679.2	ko03012	Translation factors
MSTRG.4696.1	ko00310	Lysine degradation
MSTRG.4696.1	ko03036	Chromosome and associated proteins
MSTRG.4713.1	ko00561	Glycerolipid metabolism
MSTRG.4713.1	ko00564	Glycerophospholipid metabolism
MSTRG.4713.1	ko04070	Phosphatidylinositol signaling system
MSTRG.4718.2	ko99980	Enzymes with EC numbers
MSTRG.4728.1	ko02000	Transporters
MSTRG.4728.1	ko03029	Mitochondrial biogenesis
MSTRG.4730.1	ko03040	Spliceosome
MSTRG.4730.1	ko03041	Spliceosome
MSTRG.4730.1	ko03050	Proteasome
MSTRG.4730.1	ko03051	Proteasome
MSTRG.4734.2	ko04121	Ubiquitin system
MSTRG.4737.1	ko03400	DNA repair and recombination proteins
MSTRG.4745.1	ko04040	Ion channels
MSTRG.4745.2	ko04040	Ion channels
MSTRG.4767.1	ko03010	Ribosome
MSTRG.4767.1	ko03011	Ribosome
MSTRG.4767.1	ko04121	Ubiquitin system
MSTRG.477.1	ko00194	Photosynthesis proteins
MSTRG.477.1	ko00195	Photosynthesis
MSTRG.4791.1	ko04131	Membrane trafficking
MSTRG.4792.1	ko03400	DNA repair and recombination proteins
MSTRG.4792.1	ko04147	Exosome
MSTRG.4800.1	ko00620	Pyruvate metabolism
MSTRG.4800.1	ko00710	Carbon fixation in photosynthetic organisms
MSTRG.4800.2	ko00620	Pyruvate metabolism
MSTRG.4800.2	ko00710	Carbon fixation in photosynthetic organisms
MSTRG.4800.3	ko00620	Pyruvate metabolism
MSTRG.4800.3	ko00710	Carbon fixation in photosynthetic organisms
MSTRG.4800.4	ko00620	Pyruvate metabolism
MSTRG.4800.4	ko00710	Carbon fixation in photosynthetic organisms
MSTRG.4801.1	ko01001	Protein kinases
MSTRG.4801.1	ko04075	Plant hormone signal transduction
MSTRG.4801.1	ko99980	Enzymes with EC numbers
MSTRG.4804.1	ko04031	GTP-binding proteins
MSTRG.4804.1	ko04131	Membrane trafficking
MSTRG.4804.1	ko04144	Endocytosis
MSTRG.4804.1	ko04147	Exosome
MSTRG.4810.1	ko00500	Starch and sucrose metabolism
MSTRG.4810.1	ko01003	Glycosyltransferases
MSTRG.4810.2	ko00500	Starch and sucrose metabolism
MSTRG.4810.2	ko01003	Glycosyltransferases
MSTRG.4811.1	ko01002	Peptidases and inhibitors
MSTRG.4811.1	ko03110	Chaperones and folding catalysts
MSTRG.4811.2	ko01002	Peptidases and inhibitors
MSTRG.4811.2	ko03110	Chaperones and folding catalysts
MSTRG.4841.1	ko03000	Transcription factors
MSTRG.4842.1	ko01001	Protein kinases
MSTRG.4842.1	ko04016	MAPK signaling pathway - plant
MSTRG.4858.1	ko04131	Membrane trafficking
MSTRG.4861.1	ko02000	Transporters
MSTRG.4877.1	ko00010	Glycolysis / Gluconeogenesis
MSTRG.4877.1	ko00020	Citrate cycle (TCA cycle)
MSTRG.4877.1	ko00620	Pyruvate metabolism
MSTRG.4889.1	ko00970	Aminoacyl-tRNA biosynthesis
MSTRG.4889.1	ko01007	Amino acid related enzymes
MSTRG.4889.1	ko03016	Transfer RNA biogenesis
MSTRG.4889.1	ko03029	Mitochondrial biogenesis
MSTRG.489.1	ko04131	Membrane trafficking
MSTRG.4904.4	ko99980	Enzymes with EC numbers
MSTRG.4908.1	ko04712	Circadian rhythm - plant
MSTRG.4908.2	ko04712	Circadian rhythm - plant
MSTRG.4917.1	ko03008	Ribosome biogenesis in eukaryotes
MSTRG.4917.1	ko03010	Ribosome
MSTRG.4917.1	ko03011	Ribosome
MSTRG.4917.1	ko03100	Non-coding RNAs
MSTRG.4921.1	ko01003	Glycosyltransferases
MSTRG.4927.1	ko01003	Glycosyltransferases
MSTRG.4928.1	ko03400	DNA repair and recombination proteins
MSTRG.4934.1	ko04131	Membrane trafficking
MSTRG.4937.2	ko04812	Cytoskeleton proteins
MSTRG.494.1	ko99996	General function prediction only
MSTRG.4951.1	ko03000	Transcription factors
MSTRG.4958.1	ko00010	Glycolysis / Gluconeogenesis
MSTRG.4958.1	ko00071	Fatty acid degradation
MSTRG.4958.1	ko00350	Tyrosine metabolism
MSTRG.4958.1	ko00592	alpha-Linolenic acid metabolism
MSTRG.4958.1	ko00620	Pyruvate metabolism
MSTRG.4961.1	ko03019	Messenger RNA biogenesis
MSTRG.4961.1	ko03021	Transcription machinery
MSTRG.4969.1	ko04120	Ubiquitin mediated proteolysis
MSTRG.4969.1	ko04121	Ubiquitin system
MSTRG.4971.1	ko00280	Valine, leucine and isoleucine degradation
MSTRG.4971.1	ko00640	Propanoate metabolism
MSTRG.5010.2	ko03041	Spliceosome
MSTRG.5017.1	ko02044	Secretion system
MSTRG.5017.1	ko03060	Protein export
MSTRG.5041.2	ko00053	Ascorbate and aldarate metabolism
MSTRG.5041.2	ko00480	Glutathione metabolism
MSTRG.5042.2	ko00053	Ascorbate and aldarate metabolism
MSTRG.5042.2	ko00480	Glutathione metabolism
MSTRG.5044.1	ko03110	Chaperones and folding catalysts
MSTRG.5044.1	ko04131	Membrane trafficking
MSTRG.5044.1	ko04141	Protein processing in endoplasmic reticulum
MSTRG.5044.1	ko04147	Exosome
MSTRG.5044.2	ko03110	Chaperones and folding catalysts
MSTRG.5044.2	ko04131	Membrane trafficking
MSTRG.5044.2	ko04141	Protein processing in endoplasmic reticulum
MSTRG.5044.2	ko04147	Exosome
MSTRG.5047.2	ko03110	Chaperones and folding catalysts
MSTRG.5047.2	ko04131	Membrane trafficking
MSTRG.5047.2	ko04141	Protein processing in endoplasmic reticulum
MSTRG.5047.2	ko04147	Exosome
MSTRG.5068.1	ko99980	Enzymes with EC numbers
MSTRG.5088.1	ko03040	Spliceosome
MSTRG.5088.1	ko03041	Spliceosome
MSTRG.5089.2	ko03040	Spliceosome
MSTRG.5089.2	ko03041	Spliceosome
MSTRG.5089.3	ko03040	Spliceosome
MSTRG.5089.3	ko03041	Spliceosome
MSTRG.5093.1	ko04121	Ubiquitin system
MSTRG.5093.1	ko04131	Membrane trafficking
MSTRG.5094.1	ko01001	Protein kinases
MSTRG.5094.1	ko03036	Chromosome and associated proteins
MSTRG.5097.1	ko00194	Photosynthesis proteins
MSTRG.5097.1	ko00195	Photosynthesis
MSTRG.5097.1	ko00970	Aminoacyl-tRNA biosynthesis
MSTRG.5097.1	ko03100	Non-coding RNAs
MSTRG.5111.1	ko02000	Transporters
MSTRG.5112.1	ko00562	Inositol phosphate metabolism
MSTRG.5112.1	ko04070	Phosphatidylinositol signaling system
MSTRG.5112.1	ko04131	Membrane trafficking
MSTRG.5112.1	ko04145	Phagosome
MSTRG.51.2	ko03040	Spliceosome
MSTRG.51.2	ko03041	Spliceosome
MSTRG.5130.1	ko04121	Ubiquitin system
MSTRG.5135.1	ko04031	GTP-binding proteins
MSTRG.5135.1	ko04131	Membrane trafficking
MSTRG.5135.1	ko04147	Exosome
MSTRG.5141.1	ko00230	Purine metabolism
MSTRG.5141.1	ko00730	Thiamine metabolism
MSTRG.5141.1	ko04147	Exosome
MSTRG.5143.1	ko01009	Protein phosphatases and associated proteins
MSTRG.5143.1	ko03009	Ribosome biogenesis
MSTRG.5143.1	ko03029	Mitochondrial biogenesis
MSTRG.5143.1	ko03040	Spliceosome
MSTRG.5143.1	ko03041	Spliceosome
MSTRG.5143.1	ko03051	Proteasome
MSTRG.5143.1	ko03110	Chaperones and folding catalysts
MSTRG.5143.1	ko04131	Membrane trafficking
MSTRG.5143.1	ko04141	Protein processing in endoplasmic reticulum
MSTRG.5143.1	ko04144	Endocytosis
MSTRG.5143.1	ko04147	Exosome
MSTRG.5150.1	ko03009	Ribosome biogenesis
MSTRG.5150.1	ko03012	Translation factors
MSTRG.5150.1	ko03013	Nucleocytoplasmic transport
MSTRG.5150.1	ko03015	mRNA surveillance pathway
MSTRG.5150.1	ko03019	Messenger RNA biogenesis
MSTRG.5150.1	ko03040	Spliceosome
MSTRG.5150.1	ko03041	Spliceosome
MSTRG.5153.1	ko03000	Transcription factors
MSTRG.517.1	ko00564	Glycerophospholipid metabolism
MSTRG.5182.1	ko03400	DNA repair and recombination proteins
MSTRG.5182.1	ko03430	Mismatch repair
MSTRG.5185.1	ko03012	Translation factors
MSTRG.5185.1	ko03019	Messenger RNA biogenesis
MSTRG.5187.1	ko03000	Transcription factors
MSTRG.5187.2	ko03000	Transcription factors
MSTRG.5189.1	ko03041	Spliceosome
MSTRG.5192.1	ko04131	Membrane trafficking
MSTRG.5192.1	ko04144	Endocytosis
MSTRG.5192.1	ko04147	Exosome
MSTRG.5207.1	ko00260	Glycine, serine and threonine metabolism
MSTRG.5207.1	ko00261	Monobactam biosynthesis
MSTRG.5207.1	ko00270	Cysteine and methionine metabolism
MSTRG.5207.1	ko00300	Lysine biosynthesis
MSTRG.5224.1	ko00260	Glycine, serine and threonine metabolism
MSTRG.5224.1	ko00460	Cyanoamino acid metabolism
MSTRG.5224.1	ko00630	Glyoxylate and dicarboxylate metabolism
MSTRG.5224.1	ko00670	One carbon pool by folate
MSTRG.5227.1	ko04075	Plant hormone signal transduction
MSTRG.525.2	ko03013	Nucleocytoplasmic transport
MSTRG.525.2	ko03015	mRNA surveillance pathway
MSTRG.525.2	ko03019	Messenger RNA biogenesis
MSTRG.5257.1	ko00100	Steroid biosynthesis
MSTRG.5257.1	ko00909	Sesquiterpenoid and triterpenoid biosynthesis
MSTRG.526.2	ko03036	Chromosome and associated proteins
MSTRG.5266.1	ko00010	Glycolysis / Gluconeogenesis
MSTRG.5266.1	ko00260	Glycine, serine and threonine metabolism
MSTRG.5266.1	ko04131	Membrane trafficking
MSTRG.5266.1	ko04147	Exosome
MSTRG.5280.1	ko04712	Circadian rhythm - plant
MSTRG.5290.1	ko99980	Enzymes with EC numbers
MSTRG.5318.1	ko04131	Membrane trafficking
MSTRG.5331.1	ko03012	Translation factors
MSTRG.5331.2	ko03012	Translation factors
MSTRG.535.1	ko03036	Chromosome and associated proteins
MSTRG.535.1	ko03400	DNA repair and recombination proteins
MSTRG.535.1	ko03410	Base excision repair
MSTRG.535.1	ko04812	Cytoskeleton proteins
MSTRG.5357.1	ko00010	Glycolysis / Gluconeogenesis
MSTRG.5357.1	ko00030	Pentose phosphate pathway
MSTRG.5357.1	ko00500	Starch and sucrose metabolism
MSTRG.5357.1	ko00520	Amino sugar and nucleotide sugar metabolism
MSTRG.5357.1	ko04147	Exosome
MSTRG.5362.1	ko00970	Aminoacyl-tRNA biosynthesis
MSTRG.5362.1	ko03100	Non-coding RNAs
MSTRG.5362.1	ko04121	Ubiquitin system
MSTRG.5372.1	ko03019	Messenger RNA biogenesis
MSTRG.5372.1	ko03041	Spliceosome
MSTRG.5385.1	ko01002	Peptidases and inhibitors
MSTRG.5385.1	ko03050	Proteasome
MSTRG.5385.1	ko03051	Proteasome
MSTRG.5392.1	ko04812	Cytoskeleton proteins
MSTRG.5416.1	ko03019	Messenger RNA biogenesis
MSTRG.5416.1	ko03029	Mitochondrial biogenesis
MSTRG.5416.1	ko04131	Membrane trafficking
MSTRG.5416.1	ko04812	Cytoskeleton proteins
MSTRG.5423.1	ko01001	Protein kinases
MSTRG.5427.1	ko00561	Glycerolipid metabolism
MSTRG.5435.1	ko03036	Chromosome and associated proteins
MSTRG.5438.1	ko03019	Messenger RNA biogenesis
MSTRG.5443.1	ko03036	Chromosome and associated proteins
MSTRG.5453.1	ko03036	Chromosome and associated proteins
MSTRG.5456.1	ko01002	Peptidases and inhibitors
MSTRG.5467.1	ko01002	Peptidases and inhibitors
MSTRG.5468.1	ko03010	Ribosome
MSTRG.5468.1	ko03011	Ribosome
MSTRG.5468.1	ko04121	Ubiquitin system
MSTRG.5470.2	ko04131	Membrane trafficking
MSTRG.5470.2	ko04144	Endocytosis
MSTRG.5470.2	ko04147	Exosome
MSTRG.5470.3	ko04131	Membrane trafficking
MSTRG.5470.3	ko04144	Endocytosis
MSTRG.5470.3	ko04147	Exosome
MSTRG.548.1	ko03000	Transcription factors
MSTRG.548.1	ko03036	Chromosome and associated proteins
MSTRG.548.2	ko03000	Transcription factors
MSTRG.548.2	ko03036	Chromosome and associated proteins
MSTRG.5501.1	ko00510	N-Glycan biosynthesis
MSTRG.5501.1	ko00513	Various types of N-glycan biosynthesis
MSTRG.5501.1	ko01003	Glycosyltransferases
MSTRG.5501.1	ko04141	Protein processing in endoplasmic reticulum
MSTRG.5503.1	ko00620	Pyruvate metabolism
MSTRG.5513.1	ko03012	Translation factors
MSTRG.5513.1	ko03029	Mitochondrial biogenesis
MSTRG.5520.1	ko00071	Fatty acid degradation
MSTRG.5520.1	ko00592	alpha-Linolenic acid metabolism
MSTRG.5537.1	ko00860	Porphyrin and chlorophyll metabolism
MSTRG.5546.2	ko00280	Valine, leucine and isoleucine degradation
MSTRG.5546.2	ko00410	beta-Alanine metabolism
MSTRG.5546.2	ko00640	Propanoate metabolism
MSTRG.5555.1	ko01009	Protein phosphatases and associated proteins
MSTRG.5555.1	ko03015	mRNA surveillance pathway
MSTRG.5555.1	ko03019	Messenger RNA biogenesis
MSTRG.5555.1	ko03036	Chromosome and associated proteins
MSTRG.5560.1	ko99977	Transport
MSTRG.5565.3	ko00062	Fatty acid elongation
MSTRG.5565.3	ko04626	Plant-pathogen interaction
MSTRG.5570.1	ko02000	Transporters
MSTRG.5573.1	ko03008	Ribosome biogenesis in eukaryotes
MSTRG.5573.1	ko03009	Ribosome biogenesis
MSTRG.5573.1	ko03013	Nucleocytoplasmic transport
MSTRG.5573.1	ko03016	Transfer RNA biogenesis
MSTRG.5573.1	ko03019	Messenger RNA biogenesis
MSTRG.5573.1	ko03036	Chromosome and associated proteins
MSTRG.5573.1	ko04031	GTP-binding proteins
MSTRG.5573.1	ko04147	Exosome
MSTRG.5574.1	ko03036	Chromosome and associated proteins
MSTRG.5606.1	ko03013	Nucleocytoplasmic transport
MSTRG.5606.1	ko03019	Messenger RNA biogenesis
MSTRG.5606.1	ko03036	Chromosome and associated proteins
MSTRG.5620.1	ko03018	RNA degradation
MSTRG.5620.1	ko03019	Messenger RNA biogenesis
MSTRG.5621.1	ko04131	Membrane trafficking
MSTRG.5621.2	ko04131	Membrane trafficking
MSTRG.562.2	ko00906	Carotenoid biosynthesis
MSTRG.5628.1	ko00500	Starch and sucrose metabolism
MSTRG.5640.1	ko02000	Transporters
MSTRG.5640.3	ko02000	Transporters
MSTRG.5646.1	ko02000	Transporters
MSTRG.5671.1	ko03036	Chromosome and associated proteins
MSTRG.5681.1	ko03012	Translation factors
MSTRG.5686.2	ko01002	Peptidases and inhibitors
MSTRG.5686.2	ko04121	Ubiquitin system
MSTRG.5687.1	ko04121	Ubiquitin system
MSTRG.5693.1	ko04121	Ubiquitin system
MSTRG.5706.1	ko03018	RNA degradation
MSTRG.5706.1	ko03019	Messenger RNA biogenesis
MSTRG.5737.1	ko00514	Other types of O-glycan biosynthesis
MSTRG.5737.1	ko01003	Glycosyltransferases
MSTRG.5737.1	ko03036	Chromosome and associated proteins
MSTRG.5737.2	ko00514	Other types of O-glycan biosynthesis
MSTRG.5737.2	ko01003	Glycosyltransferases
MSTRG.5737.2	ko03036	Chromosome and associated proteins
MSTRG.5752.1	ko04121	Ubiquitin system
MSTRG.5757.1	ko02000	Transporters
MSTRG.5761.1	ko03110	Chaperones and folding catalysts
MSTRG.576.1	ko02000	Transporters
MSTRG.576.1	ko04131	Membrane trafficking
MSTRG.5764.2	ko01001	Protein kinases
MSTRG.5764.2	ko04626	Plant-pathogen interaction
MSTRG.5770.1	ko00230	Purine metabolism
MSTRG.5782.1	ko03010	Ribosome
MSTRG.5782.1	ko03011	Ribosome
MSTRG.579.1	ko00900	Terpenoid backbone biosynthesis
MSTRG.5809.1	ko04131	Membrane trafficking
MSTRG.5809.1	ko04136	Autophagy - other
MSTRG.5818.1	ko03036	Chromosome and associated proteins
MSTRG.5818.1	ko03400	DNA repair and recombination proteins
MSTRG.5818.1	ko03410	Base excision repair
MSTRG.5818.1	ko04812	Cytoskeleton proteins
MSTRG.5829.1	ko02000	Transporters
MSTRG.5831.2	ko00380	Tryptophan metabolism
MSTRG.5832.1	ko00440	Phosphonate and phosphinate metabolism
MSTRG.5832.1	ko00564	Glycerophospholipid metabolism
MSTRG.5836.2	ko00561	Glycerolipid metabolism
MSTRG.5836.2	ko01003	Glycosyltransferases
MSTRG.585.1	ko00940	Phenylpropanoid biosynthesis
MSTRG.585.1	ko01002	Peptidases and inhibitors
MSTRG.5873.1	ko03010	Ribosome
MSTRG.5873.1	ko03011	Ribosome
MSTRG.5891.1	ko03016	Transfer RNA biogenesis
MSTRG.5897.1	ko01009	Protein phosphatases and associated proteins
MSTRG.5897.1	ko03009	Ribosome biogenesis
MSTRG.5897.1	ko03029	Mitochondrial biogenesis
MSTRG.5897.1	ko03040	Spliceosome
MSTRG.5897.1	ko03041	Spliceosome
MSTRG.5897.1	ko03051	Proteasome
MSTRG.5897.1	ko03060	Protein export
MSTRG.5897.1	ko03110	Chaperones and folding catalysts
MSTRG.5897.1	ko04131	Membrane trafficking
MSTRG.5897.1	ko04141	Protein processing in endoplasmic reticulum
MSTRG.5897.1	ko04144	Endocytosis
MSTRG.5897.1	ko04147	Exosome
MSTRG.5899.1	ko01003	Glycosyltransferases
MSTRG.5907.1	ko03012	Translation factors
MSTRG.5909.1	ko04131	Membrane trafficking
MSTRG.5909.1	ko04147	Exosome
MSTRG.5909.1	ko04812	Cytoskeleton proteins
MSTRG.5912.1	ko00220	Arginine biosynthesis
MSTRG.5915.1	ko00190	Oxidative phosphorylation
MSTRG.5916.1	ko03036	Chromosome and associated proteins
MSTRG.5916.1	ko04031	GTP-binding proteins
MSTRG.5916.1	ko04131	Membrane trafficking
MSTRG.5916.1	ko04144	Endocytosis
MSTRG.5916.1	ko04147	Exosome
MSTRG.5925.1	ko00520	Amino sugar and nucleotide sugar metabolism
MSTRG.5927.1	ko00561	Glycerolipid metabolism
MSTRG.5927.1	ko00564	Glycerophospholipid metabolism
MSTRG.5927.1	ko01009	Protein phosphatases and associated proteins
MSTRG.5949.1	ko03010	Ribosome
MSTRG.5949.1	ko03011	Ribosome
MSTRG.5951.1	ko04120	Ubiquitin mediated proteolysis
MSTRG.5951.1	ko04121	Ubiquitin system
MSTRG.5951.2	ko04120	Ubiquitin mediated proteolysis
MSTRG.5951.2	ko04121	Ubiquitin system
MSTRG.5961.1	ko03013	Nucleocytoplasmic transport
MSTRG.5961.1	ko03036	Chromosome and associated proteins
MSTRG.596.1	ko99998	Others
MSTRG.5966.1	ko00970	Aminoacyl-tRNA biosynthesis
MSTRG.5966.1	ko01007	Amino acid related enzymes
MSTRG.5966.1	ko03016	Transfer RNA biogenesis
MSTRG.5966.2	ko00970	Aminoacyl-tRNA biosynthesis
MSTRG.5966.2	ko01007	Amino acid related enzymes
MSTRG.5966.2	ko03016	Transfer RNA biogenesis
MSTRG.5966.3	ko00970	Aminoacyl-tRNA biosynthesis
MSTRG.5966.3	ko01007	Amino acid related enzymes
MSTRG.5966.3	ko03016	Transfer RNA biogenesis
MSTRG.5978.1	ko00020	Citrate cycle (TCA cycle)
MSTRG.5989.1	ko03009	Ribosome biogenesis
MSTRG.5989.1	ko03019	Messenger RNA biogenesis
MSTRG.5989.1	ko04131	Membrane trafficking
MSTRG.5989.1	ko04141	Protein processing in endoplasmic reticulum
MSTRG.5989.1	ko04147	Exosome
MSTRG.6015.1	ko03008	Ribosome biogenesis in eukaryotes
MSTRG.6015.1	ko03009	Ribosome biogenesis
MSTRG.602.1	ko03012	Translation factors
MSTRG.6023.3	ko00199	Cytochrome P450
MSTRG.6023.3	ko00906	Carotenoid biosynthesis
MSTRG.6028.1	ko04990	Domain-containing proteins not elsewhere classified
MSTRG.6030.1	ko00260	Glycine, serine and threonine metabolism
MSTRG.6030.1	ko00290	Valine, leucine and isoleucine biosynthesis
MSTRG.603.2	ko03110	Chaperones and folding catalysts
MSTRG.603.2	ko04091	Lectins
MSTRG.603.2	ko04141	Protein processing in endoplasmic reticulum
MSTRG.603.2	ko04145	Phagosome
MSTRG.6036.1	ko04120	Ubiquitin mediated proteolysis
MSTRG.6036.1	ko04121	Ubiquitin system
MSTRG.6047.1	ko00010	Glycolysis / Gluconeogenesis
MSTRG.6047.1	ko00620	Pyruvate metabolism
MSTRG.6047.1	ko04131	Membrane trafficking
MSTRG.6047.1	ko04147	Exosome
MSTRG.6050.1	ko03040	Spliceosome
MSTRG.6050.1	ko03041	Spliceosome
MSTRG.6056.1	ko00010	Glycolysis / Gluconeogenesis
MSTRG.6056.1	ko00030	Pentose phosphate pathway
MSTRG.6056.1	ko00051	Fructose and mannose metabolism
MSTRG.6056.1	ko00710	Carbon fixation in photosynthetic organisms
MSTRG.6056.1	ko03036	Chromosome and associated proteins
MSTRG.6056.1	ko04131	Membrane trafficking
MSTRG.6056.1	ko04147	Exosome
MSTRG.6062.1	ko00500	Starch and sucrose metabolism
MSTRG.6062.1	ko04147	Exosome
MSTRG.6062.2	ko00500	Starch and sucrose metabolism
MSTRG.6062.2	ko04147	Exosome
MSTRG.6062.3	ko00500	Starch and sucrose metabolism
MSTRG.6062.3	ko04147	Exosome
MSTRG.6079.1	ko03010	Ribosome
MSTRG.6079.1	ko03011	Ribosome
MSTRG.6093.1	ko00920	Sulfur metabolism
MSTRG.6093.1	ko03029	Mitochondrial biogenesis
MSTRG.6102.1	ko00500	Starch and sucrose metabolism
MSTRG.6102.1	ko01003	Glycosyltransferases
MSTRG.61.1	ko02000	Transporters
MSTRG.61.1	ko03029	Mitochondrial biogenesis
MSTRG.6120.1	ko00860	Porphyrin and chlorophyll metabolism
MSTRG.612.1	ko00630	Glyoxylate and dicarboxylate metabolism
MSTRG.612.1	ko01009	Protein phosphatases and associated proteins
MSTRG.6124.1	ko00620	Pyruvate metabolism
MSTRG.6124.1	ko00710	Carbon fixation in photosynthetic organisms
MSTRG.6136.1	ko00020	Citrate cycle (TCA cycle)
MSTRG.6136.1	ko00270	Cysteine and methionine metabolism
MSTRG.6136.1	ko00620	Pyruvate metabolism
MSTRG.6136.1	ko00630	Glyoxylate and dicarboxylate metabolism
MSTRG.6136.1	ko00710	Carbon fixation in photosynthetic organisms
MSTRG.615.1	ko04712	Circadian rhythm - plant
MSTRG.6165.1	ko01001	Protein kinases
MSTRG.6165.1	ko04131	Membrane trafficking
MSTRG.6184.1	ko02000	Transporters
MSTRG.6184.1	ko03000	Transcription factors
MSTRG.6184.1	ko03019	Messenger RNA biogenesis
MSTRG.6184.1	ko03032	DNA replication proteins
MSTRG.6184.1	ko04147	Exosome
MSTRG.6185.4	ko01005	Lipopolysaccharide biosynthesis proteins
MSTRG.6190.1	ko03008	Ribosome biogenesis in eukaryotes
MSTRG.6190.1	ko03009	Ribosome biogenesis
MSTRG.619.1	ko00190	Oxidative phosphorylation
MSTRG.619.1	ko04145	Phagosome
MSTRG.6203.1	ko02000	Transporters
MSTRG.6203.1	ko02010	ABC transporters
MSTRG.6203.1	ko04090	CD molecules
MSTRG.6203.1	ko04147	Exosome
MSTRG.6203.2	ko02000	Transporters
MSTRG.6203.2	ko02010	ABC transporters
MSTRG.6203.2	ko04090	CD molecules
MSTRG.6203.2	ko04147	Exosome
MSTRG.6210.1	ko03011	Ribosome
MSTRG.6210.1	ko03100	Non-coding RNAs
MSTRG.6214.1	ko00194	Photosynthesis proteins
MSTRG.6214.1	ko00195	Photosynthesis
MSTRG.6214.1	ko04131	Membrane trafficking
MSTRG.6222.1	ko04040	Ion channels
MSTRG.6222.1	ko04626	Plant-pathogen interaction
MSTRG.6228.1	ko00130	Ubiquinone and other terpenoid-quinone biosynthesis
MSTRG.6231.1	ko03010	Ribosome
MSTRG.6231.1	ko03011	Ribosome
MSTRG.6233.1	ko03015	mRNA surveillance pathway
MSTRG.6233.1	ko03019	Messenger RNA biogenesis
MSTRG.6251.2	ko03012	Translation factors
MSTRG.6259.1	ko02000	Transporters
MSTRG.6259.1	ko04131	Membrane trafficking
MSTRG.6262.2	ko04147	Exosome
MSTRG.6266.1	ko00260	Glycine, serine and threonine metabolism
MSTRG.6266.1	ko00400	Phenylalanine, tyrosine and tryptophan biosynthesis
MSTRG.6267.1	ko02000	Transporters
MSTRG.6271.1	ko03010	Ribosome
MSTRG.6271.1	ko03011	Ribosome
MSTRG.6272.1	ko03010	Ribosome
MSTRG.6272.1	ko03011	Ribosome
MSTRG.6276.1	ko03030	DNA replication
MSTRG.6276.1	ko03032	DNA replication proteins
MSTRG.6276.1	ko03400	DNA repair and recombination proteins
MSTRG.6276.1	ko03410	Base excision repair
MSTRG.6276.1	ko03420	Nucleotide excision repair
MSTRG.6276.1	ko03440	Homologous recombination
MSTRG.6299.1	ko01003	Glycosyltransferases
MSTRG.6301.1	ko03000	Transcription factors
MSTRG.631.1	ko99995	Signaling proteins
MSTRG.6318.1	ko04131	Membrane trafficking
MSTRG.6318.1	ko04144	Endocytosis
MSTRG.6318.1	ko04147	Exosome
MSTRG.6320.1	ko03036	Chromosome and associated proteins
MSTRG.6320.1	ko04812	Cytoskeleton proteins
MSTRG.6324.1	ko01009	Protein phosphatases and associated proteins
MSTRG.6324.1	ko03400	DNA repair and recombination proteins
MSTRG.6327.1	ko02048	Prokaryotic defense system
MSTRG.6327.1	ko03036	Chromosome and associated proteins
MSTRG.6327.1	ko04812	Cytoskeleton proteins
MSTRG.6328.2	ko03032	DNA replication proteins
MSTRG.634.1	ko00240	Pyrimidine metabolism
MSTRG.6348.2	ko03012	Translation factors
MSTRG.6348.2	ko03029	Mitochondrial biogenesis
MSTRG.6354.1	ko03010	Ribosome
MSTRG.6354.1	ko03011	Ribosome
MSTRG.6368.1	ko03009	Ribosome biogenesis
MSTRG.637.1	ko01003	Glycosyltransferases
MSTRG.6392.2	ko00240	Pyrimidine metabolism
MSTRG.6400.1	ko00052	Galactose metabolism
MSTRG.6404.1	ko03050	Proteasome
MSTRG.6404.1	ko03051	Proteasome
MSTRG.6417.1	ko04131	Membrane trafficking
MSTRG.6417.1	ko04146	Peroxisome
MSTRG.6424.1	ko03010	Ribosome
MSTRG.6424.1	ko03011	Ribosome
MSTRG.6436.2	ko03041	Spliceosome
MSTRG.6436.2	ko03110	Chaperones and folding catalysts
MSTRG.6437.1	ko00860	Porphyrin and chlorophyll metabolism
MSTRG.6444.1	ko03009	Ribosome biogenesis
MSTRG.6445.1	ko03000	Transcription factors
MSTRG.6447.1	ko00010	Glycolysis / Gluconeogenesis
MSTRG.6447.1	ko00710	Carbon fixation in photosynthetic organisms
MSTRG.6447.1	ko04147	Exosome
MSTRG.6454.1	ko01002	Peptidases and inhibitors
MSTRG.6454.1	ko03110	Chaperones and folding catalysts
MSTRG.6457.1	ko00010	Glycolysis / Gluconeogenesis
MSTRG.6457.1	ko00710	Carbon fixation in photosynthetic organisms
MSTRG.6457.1	ko04131	Membrane trafficking
MSTRG.6457.1	ko04147	Exosome
MSTRG.6468.1	ko99980	Enzymes with EC numbers
MSTRG.6472.1	ko01001	Protein kinases
MSTRG.6472.2	ko01001	Protein kinases
MSTRG.6474.2	ko04131	Membrane trafficking
MSTRG.6478.1	ko02044	Secretion system
MSTRG.6478.1	ko03060	Protein export
MSTRG.6479.1	ko01001	Protein kinases
MSTRG.6479.1	ko04626	Plant-pathogen interaction
MSTRG.6492.1	ko03036	Chromosome and associated proteins
MSTRG.6492.1	ko03110	Chaperones and folding catalysts
MSTRG.6492.1	ko04812	Cytoskeleton proteins
MSTRG.6492.2	ko03036	Chromosome and associated proteins
MSTRG.6492.2	ko03110	Chaperones and folding catalysts
MSTRG.6492.2	ko04812	Cytoskeleton proteins
MSTRG.6492.3	ko03036	Chromosome and associated proteins
MSTRG.6492.3	ko03110	Chaperones and folding catalysts
MSTRG.6492.3	ko04812	Cytoskeleton proteins
MSTRG.6492.4	ko03036	Chromosome and associated proteins
MSTRG.6492.4	ko03110	Chaperones and folding catalysts
MSTRG.6492.4	ko04812	Cytoskeleton proteins
MSTRG.6492.5	ko03036	Chromosome and associated proteins
MSTRG.6492.5	ko03110	Chaperones and folding catalysts
MSTRG.6492.5	ko04812	Cytoskeleton proteins
MSTRG.6492.6	ko03036	Chromosome and associated proteins
MSTRG.6492.6	ko03110	Chaperones and folding catalysts
MSTRG.6492.6	ko04812	Cytoskeleton proteins
MSTRG.6506.2	ko00310	Lysine degradation
MSTRG.6506.2	ko03036	Chromosome and associated proteins
MSTRG.6509.1	ko04131	Membrane trafficking
MSTRG.6524.1	ko00240	Pyrimidine metabolism
MSTRG.6529.1	ko04812	Cytoskeleton proteins
MSTRG.6530.1	ko03010	Ribosome
MSTRG.6530.1	ko03011	Ribosome
MSTRG.6542.1	ko00500	Starch and sucrose metabolism
MSTRG.6542.1	ko01003	Glycosyltransferases
MSTRG.6543.1	ko03040	Spliceosome
MSTRG.6543.1	ko03041	Spliceosome
MSTRG.6547.1	ko03036	Chromosome and associated proteins
MSTRG.6547.1	ko04812	Cytoskeleton proteins
MSTRG.6551.1	ko00520	Amino sugar and nucleotide sugar metabolism
MSTRG.6555.1	ko04121	Ubiquitin system
MSTRG.6566.1	ko04131	Membrane trafficking
MSTRG.6572.1	ko04131	Membrane trafficking
MSTRG.6572.1	ko04146	Peroxisome
MSTRG.6573.1	ko00040	Pentose and glucuronate interconversions
MSTRG.6573.1	ko00051	Fructose and mannose metabolism
MSTRG.658.1	ko03015	mRNA surveillance pathway
MSTRG.658.1	ko03019	Messenger RNA biogenesis
MSTRG.6588.1	ko04990	Domain-containing proteins not elsewhere classified
MSTRG.6603.1	ko04121	Ubiquitin system
MSTRG.6608.1	ko99980	Enzymes with EC numbers
MSTRG.6608.2	ko99980	Enzymes with EC numbers
MSTRG.6613.1	ko04075	Plant hormone signal transduction
MSTRG.6616.1	ko03012	Translation factors
MSTRG.6616.1	ko03029	Mitochondrial biogenesis
MSTRG.6616.1	ko04147	Exosome
MSTRG.6616.1	ko04626	Plant-pathogen interaction
MSTRG.6617.1	ko04121	Ubiquitin system
MSTRG.6628.1	ko02000	Transporters
MSTRG.6630.1	ko03021	Transcription machinery
MSTRG.6630.1	ko03022	Basal transcription factors
MSTRG.6630.1	ko03400	DNA repair and recombination proteins
MSTRG.6630.1	ko03420	Nucleotide excision repair
MSTRG.6658.1	ko01001	Protein kinases
MSTRG.6658.1	ko03036	Chromosome and associated proteins
MSTRG.6658.1	ko03400	DNA repair and recombination proteins
MSTRG.6669.1	ko03021	Transcription machinery
MSTRG.6669.1	ko03036	Chromosome and associated proteins
MSTRG.6677.1	ko00520	Amino sugar and nucleotide sugar metabolism
MSTRG.6677.1	ko01003	Glycosyltransferases
MSTRG.6678.1	ko02000	Transporters
MSTRG.6683.1	ko03019	Messenger RNA biogenesis
MSTRG.6683.2	ko03019	Messenger RNA biogenesis
MSTRG.6694.1	ko03040	Spliceosome
MSTRG.6694.1	ko03041	Spliceosome
MSTRG.6702.2	ko03036	Chromosome and associated proteins
MSTRG.6708.1	ko01001	Protein kinases
MSTRG.6709.1	ko01001	Protein kinases
MSTRG.6709.1	ko03036	Chromosome and associated proteins
MSTRG.6709.1	ko99980	Enzymes with EC numbers
MSTRG.6720.2	ko04131	Membrane trafficking
MSTRG.672.1	ko03012	Translation factors
MSTRG.672.2	ko03012	Translation factors
MSTRG.674.1	ko04016	MAPK signaling pathway - plant
MSTRG.6748.2	ko03019	Messenger RNA biogenesis
MSTRG.6748.2	ko03029	Mitochondrial biogenesis
MSTRG.6748.2	ko04131	Membrane trafficking
MSTRG.6748.2	ko04812	Cytoskeleton proteins
MSTRG.6754.1	ko03018	RNA degradation
MSTRG.6754.1	ko03019	Messenger RNA biogenesis
MSTRG.6754.1	ko03029	Mitochondrial biogenesis
MSTRG.6754.1	ko03110	Chaperones and folding catalysts
MSTRG.6754.1	ko04147	Exosome
MSTRG.6756.1	ko03036	Chromosome and associated proteins
MSTRG.6756.1	ko04812	Cytoskeleton proteins
MSTRG.6756.2	ko03036	Chromosome and associated proteins
MSTRG.6756.2	ko04812	Cytoskeleton proteins
MSTRG.6789.1	ko00061	Fatty acid biosynthesis
MSTRG.6789.1	ko01004	Lipid biosynthesis proteins
MSTRG.6797.2	ko03019	Messenger RNA biogenesis
MSTRG.6807.2	ko03010	Ribosome
MSTRG.6807.2	ko03011	Ribosome
MSTRG.681.1	ko00520	Amino sugar and nucleotide sugar metabolism
MSTRG.6814.2	ko03009	Ribosome biogenesis
MSTRG.6814.2	ko03036	Chromosome and associated proteins
MSTRG.6814.2	ko03110	Chaperones and folding catalysts
MSTRG.6814.2	ko03400	DNA repair and recombination proteins
MSTRG.6814.2	ko03410	Base excision repair
MSTRG.6814.2	ko04812	Cytoskeleton proteins
MSTRG.6828.1	ko99977	Transport
MSTRG.6848.2	ko04030	G protein-coupled receptors
MSTRG.6852.1	ko01002	Peptidases and inhibitors
MSTRG.6852.1	ko04121	Ubiquitin system
MSTRG.6858.1	ko03036	Chromosome and associated proteins
MSTRG.686.2	ko03036	Chromosome and associated proteins
MSTRG.686.2	ko03110	Chaperones and folding catalysts
MSTRG.686.2	ko04147	Exosome
MSTRG.6867.1	ko03050	Proteasome
MSTRG.6867.1	ko03051	Proteasome
MSTRG.6869.2	ko04120	Ubiquitin mediated proteolysis
MSTRG.6869.2	ko04121	Ubiquitin system
[truncated: 1,141 more rows]
