# Supplementary material for: Integrated SMRT and Illumina Sequencing Provide New Insights into Crocin Biosynthesis of Gardenia jasminoides
Source: Int J Mol Sci. 2022 Jun 5;23(11):6321. doi: 10.3390/ijms23116321 (PMC9181021; doi:10.3390/ijms23116321)
Supplement: Supplementary file 1 [file ijms-23-06321-s001.zip › Table S2.xlsx]

## Sheet: Table S2
MSTRG.10004.1-1F	B3	TF	B3->B3
MSTRG.10004.1-2F	B3	TF	B3->B3
MSTRG.10027.1-2F	NAC	TF	NAC
MSTRG.10028.3-1F	BES1	TF	BES1
MSTRG.10034.1-2F	C2H2	TF	C2H2
MSTRG.1011.2-2F	RWP-RK	TF	RWP-RK
MSTRG.10121.1-0F	NAC	TF	NAC
MSTRG.10197.1-2F	mTERF	TR	mTERF
MSTRG.10351.1-2F	Others	TR	Others
MSTRG.10366.1-0F	Jumonji	TR	Jumonji
MSTRG.10366.1-1F	Jumonji	TR	Jumonji
MSTRG.10477.1-0F	MYB-related	TF	MYB->MYB-related
MSTRG.10509.1-2F	NF-X1	TF	NF-X1
MSTRG.10531.2-1F	SNF2	TR	SNF2
MSTRG.10531.2-2R	C2H2	TF	C2H2
MSTRG.10575.1-1F	SNF2	TR	SNF2
MSTRG.10575.1-2F	SNF2	TR	SNF2
MSTRG.10605.2-2F	SOH1	TR	SOH1
MSTRG.10789.1-0F	Jumonji	TR	Jumonji
MSTRG.10857.1-2F	GNAT	TR	GNAT
MSTRG.10857.2-2F	GNAT	TR	GNAT
MSTRG.1150.1-0F	SNF2	TR	SNF2
MSTRG.1150.1-1F	SNF2	TR	SNF2
MSTRG.1213.1-2F	SNF2	TR	SNF2
MSTRG.1247.1-1F	TAZ	TR	TAZ
MSTRG.1247.1-2F	TAZ	TR	TAZ
MSTRG.1418.1-0F	Tify	TF	Tify
MSTRG.1546.1-1F	SWI/SNF-SWI3	TR	SWI/SNF-SWI3
MSTRG.1561.1-1F	NAC	TF	NAC
MSTRG.1561.3-2F	NAC	TF	NAC
MSTRG.1606.1-2F	MADS-M-type	TF	MADS->MADS-M-type
MSTRG.1698.2-0F	Whirly	TF	Whirly
MSTRG.1698.2-2F	Whirly	TF	Whirly
MSTRG.190.1-1F	C2C2-LSD	TF	C2C2->C2C2-LSD
MSTRG.1920.1-2F	HB-other	TF	HB->HB-other
MSTRG.1973.1-0F	LOB	TF	LOB
MSTRG.2021.1-2F	bZIP	TF	bZIP
MSTRG.2028.1-0F	AUX/IAA	TR	AUX/IAA
MSTRG.2028.1-1F	AUX/IAA	TR	AUX/IAA
MSTRG.2028.1-2F	AUX/IAA	TR	AUX/IAA
MSTRG.2045.1-1F	mTERF	TR	mTERF
MSTRG.2074.1-2F	SNF2	TR	SNF2
MSTRG.215.1-1F	SNF2	TR	SNF2
MSTRG.217.2-0F	Jumonji	TR	Jumonji
MSTRG.2173.1-0F	C2C2-LSD	TF	C2C2->C2C2-LSD
MSTRG.2214.1-0F	HB-other	TF	HB->HB-other
MSTRG.2227.1-0F	SBP	TF	SBP
MSTRG.2227.1-1F	SBP	TF	SBP
MSTRG.2312.1-0F	HB-other	TF	HB->HB-other
MSTRG.2361.1-0F	MYB-related	TF	MYB->MYB-related
MSTRG.2361.1-2F	ARID	TR	ARID
MSTRG.2396.1-0F	bZIP	TF	bZIP
MSTRG.240.1-2F	C3H	TF	C3H
MSTRG.2465.1-2F	SWI/SNF-BAF60b	TR	SWI/SNF-BAF60b
MSTRG.2495.1-1F	C3H	TF	C3H
MSTRG.2528.1-0F	NF-YA	TF	NF-Y->NF-YA
MSTRG.2528.1-1F	NF-YA	TF	NF-Y->NF-YA
MSTRG.257.1-0F	VOZ	TF	VOZ
MSTRG.257.1-2F	VOZ	TF	VOZ
MSTRG.2573.1-2F	MADS-MIKC	TF	MADS->MADS-MIKC
MSTRG.2708.1-1F	RWP-RK	TF	RWP-RK
MSTRG.2708.2-1F	RWP-RK	TF	RWP-RK
MSTRG.2731.1-1F	SET	TR	SET
MSTRG.2732.1-0F	SET	TR	SET
MSTRG.2734.1-1F	SET	TR	SET
MSTRG.2737.1-0F	FAR1	TF	FAR1
MSTRG.2737.1-2F	FAR1	TF	FAR1
MSTRG.2740.1-0F	SET	TR	SET
MSTRG.2740.2-0F	SET	TR	SET
MSTRG.283.2-2F	bHLH	TF	bHLH
MSTRG.2830.1-2F	AP2/ERF-ERF	TF	AP2/ERF->AP2/ERF-ERF
MSTRG.2911.1-0F	SBP	TF	SBP
MSTRG.2911.1-1F	SBP	TF	SBP
MSTRG.2950.3-0F	NF-YC	TF	NF-Y->NF-YC
MSTRG.2960.1-0F	SNF2	TR	SNF2
MSTRG.2999.1-0F	CPP	TF	CPP
MSTRG.2999.1-2F	CPP	TF	CPP
MSTRG.3257.1-0F	C3H	TF	C3H
MSTRG.3264.1-1F	C2H2	TF	C2H2
MSTRG.3281.1-1F	MADS-M-type	TF	MADS->MADS-M-type
MSTRG.3312.1-2F	SNF2	TR	SNF2
MSTRG.336.1-1F	MADS-MIKC	TF	MADS->MADS-MIKC
MSTRG.3402.1-1F	E2F-DP	TF	E2F-DP
MSTRG.3498.2-1F	SET	TR	SET
MSTRG.3516.1-0F	Others	TR	Others
MSTRG.3528.1-1F	RWP-RK	TF	RWP-RK
MSTRG.3571.1-1F	B3	TF	B3->B3
MSTRG.3731.1-0F	C2C2-LSD	TF	C2C2->C2C2-LSD
MSTRG.3731.1-2F	C2C2-LSD	TF	C2C2->C2C2-LSD
MSTRG.3865.1-2F	C3H	TF	C3H
MSTRG.3886.1-1F	EIL	TF	EIL
MSTRG.3888.2-2F	GRAS	TF	GRAS
MSTRG.4040.1-1F	C2C2-YABBY	TF	C2C2->C2C2-YABBY
MSTRG.4040.1-2F	C2C2-YABBY	TF	C2C2->C2C2-YABBY
MSTRG.4077.1-2F	MYB-related	TF	MYB->MYB-related
MSTRG.4160.2-2F	MADS-M-type	TF	MADS->MADS-M-type
MSTRG.4187.1-1F	RWP-RK	TF	RWP-RK
MSTRG.4203.1-2F	MYB-related	TF	MYB->MYB-related
MSTRG.4228.1-1F	SBP	TF	SBP
MSTRG.4268.1-0F	IWS1	TR	IWS1
MSTRG.4296.2-2F	FAR1	TF	FAR1
MSTRG.4324.1-1F	Jumonji	TR	Jumonji
MSTRG.435.1-2F	HB-HD-ZIP	TF	HB->HB-HD-ZIP
MSTRG.4391.1-0F	B3	TF	B3->B3
MSTRG.4409.1-2F	GNAT	TR	GNAT
MSTRG.4476.1-1F	FAR1	TF	FAR1
MSTRG.4476.2-1F	FAR1	TF	FAR1
MSTRG.4525.1-0F	TRAF	TR	TRAF
MSTRG.4617.1-0F	NF-YC	TF	NF-Y->NF-YC
MSTRG.4724.2-1F	HB-other	TF	HB->HB-other
MSTRG.4737.1-0F	SNF2	TR	SNF2
MSTRG.480.2-1F	PHD	TR	PHD
MSTRG.482.1-2F	TRAF	TR	TRAF
MSTRG.4841.1-0F	MADS-MIKC	TF	MADS->MADS-MIKC
MSTRG.4916.1-2F	AP2/ERF-ERF	TF	AP2/ERF->AP2/ERF-ERF
MSTRG.4942.1-1F	bZIP	TF	bZIP
MSTRG.4951.1-2F	AP2/ERF-ERF	TF	AP2/ERF->AP2/ERF-ERF
MSTRG.4982.2-1F	PHD	TR	PHD
MSTRG.4983.1-2F	TRAF	TR	TRAF
MSTRG.5033.1-0F	SWI/SNF-SWI3	TR	SWI/SNF-SWI3
MSTRG.5033.1-1F	MYB-related	TF	MYB->MYB-related
MSTRG.5153.1-0F	MYB-related	TF	MYB->MYB-related
MSTRG.5153.1-1F	MYB-related	TF	MYB->MYB-related
MSTRG.5187.1-1F	MADS-MIKC	TF	MADS->MADS-MIKC
MSTRG.5187.2-1F	MADS-MIKC	TF	MADS->MADS-MIKC
MSTRG.5227.1-1F	AUX/IAA	TR	AUX/IAA
MSTRG.5227.1-2F	AUX/IAA	TR	AUX/IAA
MSTRG.5293.2-2F	Jumonji	TR	Jumonji
MSTRG.5428.1-1F	TRAF	TR	TRAF
MSTRG.5436.1-1F	LOB	TF	LOB
MSTRG.548.1-1F	SNF2	TR	SNF2
MSTRG.548.2-1F	SNF2	TR	SNF2
MSTRG.5508.1-0F	AUX/IAA	TR	AUX/IAA
MSTRG.5508.1-1F	AUX/IAA	TR	AUX/IAA
MSTRG.5579.2-2F	C3H	TF	C3H
MSTRG.5582.3-0F	C3H	TF	C3H
MSTRG.5604.1-0F	C2C2-YABBY	TF	C2C2->C2C2-YABBY
MSTRG.5604.1-1F	C2C2-YABBY	TF	C2C2->C2C2-YABBY
MSTRG.577.1-0F	C3H	TF	C3H
MSTRG.577.1-2F	C3H	TF	C3H
MSTRG.5903.1-1F	Others	TR	Others
MSTRG.5962.1-1F	S1Fa-like	TF	S1Fa-like
MSTRG.6021.1-0F	PLATZ	TF	PLATZ
MSTRG.6045.1-2F	Trihelix	TF	Trihelix
MSTRG.6050.1-2F	C3H	TF	C3H
MSTRG.6076.1-1F	bZIP	TF	bZIP
MSTRG.6204.1-1F	NAC	TF	NAC
MSTRG.6204.1-2F	NAC	TF	NAC
MSTRG.6322.1-1F	PHD	TR	PHD
MSTRG.6348.2-0F	mTERF	TR	mTERF
MSTRG.6349.1-2F	C3H	TF	C3H
MSTRG.6445.1-1F	MYB-related	TF	MYB->MYB-related
MSTRG.6466.1-0F	C3H	TF	C3H
MSTRG.6466.1-1F	C3H	TF	C3H
MSTRG.6584.1-0F	C3H	TF	C3H
MSTRG.6584.1-2F	C3H	TF	C3H
MSTRG.6588.1-0F	TUB	TF	TUB
MSTRG.6588.1-1F	TUB	TF	TUB
MSTRG.6617.1-0F	TRAF	TR	TRAF
MSTRG.6619.1-0F	C2H2	TF	C2H2
MSTRG.665.2-2F	C2H2	TF	C2H2
MSTRG.6654.1-2F	HSF	TF	HSF
MSTRG.6655.1-1F	Tify	TF	Tify
MSTRG.6655.1-2F	Others	TR	Others
MSTRG.6669.1-1F	GNAT	TR	GNAT
MSTRG.6701.1-0F	Jumonji	TR	Jumonji
MSTRG.6701.1-2F	Jumonji	TR	Jumonji
MSTRG.6727.1-1F	SET	TR	SET
MSTRG.6775.1-0F	LUG	TR	LUG
MSTRG.6775.2-0F	LUG	TR	LUG
MSTRG.6775.3-0F	LUG	TR	LUG
MSTRG.685.1-0F	SNF2	TR	SNF2
MSTRG.7023.1-1F	C2C2-Dof	TF	C2C2->C2C2-Dof
MSTRG.7102.1-0F	C3H	TF	C3H
MSTRG.7111.1-0F	HB-HD-ZIP	TF	HB->HB-HD-ZIP
MSTRG.716.1-0F	DDT	TR	DDT
MSTRG.7180.1-1F	SNF2	TR	SNF2
MSTRG.7184.1-1F	C3H	TF	C3H
MSTRG.7184.1-2F	C3H	TF	C3H
MSTRG.7184.4-1F	C3H	TF	C3H
MSTRG.7184.4-2F	C3H	TF	C3H
MSTRG.7239.1-1F	NAC	TF	NAC
MSTRG.7239.1-2F	NAC	TF	NAC
MSTRG.7257.1-1F	SNF2	TR	SNF2
MSTRG.7299.1-1F	bZIP	TF	bZIP
MSTRG.7319.1-2F	Alfin-like	TF	Alfin-like
MSTRG.7340.1-1F	C2H2	TF	C2H2
MSTRG.7415.1-0F	CPP	TF	CPP
MSTRG.7448.1-1F	Tify	TF	Tify
MSTRG.7454.1-0F	LUG	TR	LUG
MSTRG.7454.2-0F	LUG	TR	LUG
MSTRG.7534.1-1F	SNF2	TR	SNF2
MSTRG.7534.1-2F	SNF2	TR	SNF2
MSTRG.7561.1-0F	NAC	TF	NAC
MSTRG.7561.1-2F	NAC	TF	NAC
MSTRG.7622.1-1F	HMG	TR	HMG
MSTRG.7656.1-1F	AUX/IAA	TR	AUX/IAA
MSTRG.7716.1-1F	ARID	TR	ARID
MSTRG.7729.1-0F	Others	TR	Others
MSTRG.7729.1-2F	Others	TR	Others
MSTRG.7914.1-2F	MYB-related	TF	MYB->MYB-related
MSTRG.7920.2-1F	IWS1	TR	IWS1
MSTRG.7968.1-0F	GARP-G2-like	TF	GARP->GARP-G2-like
MSTRG.8005.1-2F	C3H	TF	C3H
MSTRG.8005.2-2F	C3H	TF	C3H
MSTRG.8032.1-2F	Others	TR	Others
MSTRG.8034.1-0F	CAMTA	TF	CAMTA
MSTRG.8034.2-0F	CAMTA	TF	CAMTA
MSTRG.8035.1-1F	MADS-MIKC	TF	MADS->MADS-MIKC
MSTRG.8061.1-0F	SET	TR	SET
MSTRG.8073.1-1F	RB	TR	RB
MSTRG.8118.2-0F	AUX/IAA	TR	AUX/IAA
MSTRG.8118.2-1F	AUX/IAA	TR	AUX/IAA
MSTRG.8118.2-2F	AUX/IAA	TR	AUX/IAA
MSTRG.8118.3-0F	AUX/IAA	TR	AUX/IAA
MSTRG.8118.3-1F	AUX/IAA	TR	AUX/IAA
MSTRG.8118.3-2F	AUX/IAA	TR	AUX/IAA
MSTRG.8150.1-2F	GNAT	TR	GNAT
MSTRG.8212.1-1F	B3	TF	B3->B3
MSTRG.8212.2-1F	B3	TF	B3->B3
MSTRG.8260.1-2F	TAZ	TR	TAZ
MSTRG.8297.1-1F	MADS-M-type	TF	MADS->MADS-M-type
MSTRG.8298.1-1F	MADS-M-type	TF	MADS->MADS-M-type
MSTRG.8311.1-2F	TCP	TF	TCP
MSTRG.8415.1-1F	HB-HD-ZIP	TF	HB->HB-HD-ZIP
MSTRG.8479.1-2F	Others	TR	Others
MSTRG.8568.1-0F	SWI/SNF-BAF60b	TR	SWI/SNF-BAF60b
MSTRG.8626.1-1F	SET	TR	SET
MSTRG.890.1-2F	MADS-MIKC	TF	MADS->MADS-MIKC
MSTRG.9063.3-0F	AUX/IAA	TR	AUX/IAA
MSTRG.9063.3-2F	AUX/IAA	TR	AUX/IAA
MSTRG.9102.1-0F	HB-other	TF	HB->HB-other
MSTRG.9107.1-0F	AUX/IAA	TR	AUX/IAA
MSTRG.9107.1-2F	AUX/IAA	TR	AUX/IAA
MSTRG.9313.1-1F	bZIP	TF	bZIP
MSTRG.9329.4-0F	MYB-related	TF	MYB->MYB-related
MSTRG.9329.4-2F	MYB-related	TF	MYB->MYB-related
MSTRG.9355.3-1F	bZIP	TF	bZIP
MSTRG.9355.4-1F	bZIP	TF	bZIP
MSTRG.9361.1-0F	SWI/SNF-BAF60b	TR	SWI/SNF-BAF60b
MSTRG.9361.1-1F	C3H	TF	C3H
MSTRG.9373.1-1F	SNF2	TR	SNF2
MSTRG.9412.1-1F	MYB-related	TF	MYB->MYB-related
MSTRG.9412.1-2F	SWI/SNF-SWI3	TR	SWI/SNF-SWI3
MSTRG.9459.1-0F	B3	TF	B3->B3
MSTRG.9527.1-1F	MYB-related	TF	MYB->MYB-related
MSTRG.9579.1-1F	Others	TR	Others
MSTRG.9579.1-2F	C2C2-GATA	TF	C2C2->C2C2-GATA
MSTRG.9699.3-0F	C2H2	TF	C2H2
MSTRG.9699.3-2F	C2H2	TF	C2H2
MSTRG.9729.1-0F	FAR1	TF	FAR1
MSTRG.9737.1-0F	C3H	TF	C3H
MSTRG.9738.2-1F	AUX/IAA	TR	AUX/IAA
MSTRG.9752.2-0F	Alfin-like	TF	Alfin-like
MSTRG.9752.3-0F	Alfin-like	TF	Alfin-like
MSTRG.9771.1-0F	MYB-related	TF	MYB->MYB-related
MSTRG.9771.1-1F	MYB-related	TF	MYB->MYB-related
MSTRG.9802.1-1F	C3H	TF	C3H
MSTRG.9910.1-0F	TRAF	TR	TRAF
MSTRG.9972.1-2F	C3H	TF	C3H
MSTRG.9978.2-2F	BBR-BPC	TF	BBR-BPC
MSTRG.9988.1-2F	MADS-MIKC	TF	MADS->MADS-MIKC
