# Supplementary material for: Integrated SMRT and Illumina Sequencing Provide New Insights into Crocin Biosynthesis of Gardenia jasminoides
Source: Int J Mol Sci. 2022 Jun 5;23(11):6321. doi: 10.3390/ijms23116321 (PMC9181021; doi:10.3390/ijms23116321)
Supplement: Supplementary file 1 [file ijms-23-06321-s001.zip › Table S3.xlsx]

## Sheet: Table S3
lncNRA_id	Gene_id	Distance
MSTRG_10003_1	Gj9A971T110	70695
MSTRG_10003_1	Gj9A971T115	87657
MSTRG_10003_1	Gj9A972T146	32586
MSTRG_10003_1	Gj9A972T149	45507
MSTRG_10003_1	Gj9A972T150	46422
MSTRG_10003_1	Gj9A972T151	39299
MSTRG_10003_1	Gj9A973T82	78234
MSTRG_10003_1	Gj9A973T83	80239
MSTRG_10003_1	Gj9P971T15	73600
MSTRG_10003_1	Gj9P971T24	82355
MSTRG_10003_1	Gj9P972T13	36307
MSTRG_10003_1	Gj9P972T19	24899
MSTRG_10003_1	Gj9P972T30	51547
MSTRG_10003_1	Gj9P973T5	60464
MSTRG_10003_1	Gj9X971T52	91812
MSTRG_10003_1	Gj9X972T80	50259
MSTRG_10003_1	MSTRG_10000	28130
MSTRG_10003_1	MSTRG_10001	74537
MSTRG_10003_1	MSTRG_10002	32316
MSTRG_10003_1	MSTRG_10003	334
MSTRG_10003_1	MSTRG_10004	83316
MSTRG_10003_1	MSTRG_10005	91509
MSTRG_10003_1	MSTRG_10009	102723
MSTRG_10003_1	MSTRG_9993	84366
MSTRG_10003_1	MSTRG_9995	5231
MSTRG_10003_1	MSTRG_9996	10738
MSTRG_10003_1	MSTRG_9997	15114
MSTRG_10003_1	MSTRG_9998	17977
MSTRG_10003_1	MSTRG_9999	28978
MSTRG_10009_1	Gj9A972T149	56889
MSTRG_10009_1	Gj9A973T82	24162
MSTRG_10009_1	Gj9A973T83	22157
MSTRG_10009_1	Gj9A974T89	95221
MSTRG_10009_1	Gj9A974T90	101832
MSTRG_10009_1	Gj9P972T19	77497
MSTRG_10009_1	Gj9P972T30	50849
MSTRG_10009_1	Gj9P973T5	41932
MSTRG_10009_1	Gj9P974T3	69954
MSTRG_10009_1	Gj9X973T31	33276
MSTRG_10009_1	Gj9X973T41	50691
MSTRG_10009_1	MSTRG_10001	27859
MSTRG_10009_1	MSTRG_10002	70080
MSTRG_10009_1	MSTRG_10003	102062
MSTRG_10009_1	MSTRG_10004	19080
MSTRG_10009_1	MSTRG_10005	10887
MSTRG_10009_1	MSTRG_10006	48486
MSTRG_10009_1	MSTRG_10007	77623
MSTRG_10009_1	MSTRG_10008	38510
MSTRG_10009_1	MSTRG_10009	327
MSTRG_10009_1	MSTRG_10010	4033
MSTRG_10009_1	MSTRG_10012	41658
MSTRG_10009_1	MSTRG_9996	91658
MSTRG_10009_1	MSTRG_9997	87282
MSTRG_10009_1	MSTRG_9998	84419
MSTRG_10009_1	MSTRG_9999	73418
MSTRG_10019_1	Gj9A975T75	56689
MSTRG_10019_1	Gj9A975T85	8470
MSTRG_10019_1	Gj9A976T69	79473
MSTRG_10019_1	Gj9P974T9	91385
MSTRG_10019_1	Gj9P975T18	38542
MSTRG_10019_1	Gj9P975T22	22326
MSTRG_10019_1	Gj9P975T25	5748
MSTRG_10019_1	Gj9P976T12	84414
MSTRG_10019_1	Gj9P976T15	66081
MSTRG_10019_1	Gj9P976T8	44459
MSTRG_10019_1	Gj9P976T9	46041
MSTRG_10019_1	Gj9X974T63	96117
MSTRG_10019_1	Gj9X976T25	56341
MSTRG_10019_1	Gj9X976T26	63014
MSTRG_10019_1	Gj9X976T27	73578
MSTRG_10019_1	Gj9X976T48	29979
MSTRG_10019_1	Gj9X976T54	57671
MSTRG_10019_1	MSTRG_10011	82161
MSTRG_10019_1	MSTRG_10013	73570
MSTRG_10019_1	MSTRG_10014	62231
MSTRG_10019_1	MSTRG_10015	37298
MSTRG_10019_1	MSTRG_10016	24706
MSTRG_10019_1	MSTRG_10017	31654
MSTRG_10019_1	MSTRG_10018	52151
MSTRG_10019_1	MSTRG_10019	73
MSTRG_10019_1	MSTRG_10020	5251
MSTRG_10019_1	MSTRG_10021	21414
MSTRG_10019_1	MSTRG_10022	65141
MSTRG_10019_1	MSTRG_10023	38815
MSTRG_10019_1	MSTRG_10025	87255
MSTRG_10027_1	Gj9A976T69	58817
MSTRG_10027_1	Gj9A976T74	29191
MSTRG_10027_1	Gj9A977T101	33886
MSTRG_10027_1	Gj9A977T94	13328
MSTRG_10027_1	Gj9A977T98	64940
MSTRG_10027_1	Gj9P976T12	53876
MSTRG_10027_1	Gj9P976T15	72209
MSTRG_10027_1	Gj9P976T8	93831
MSTRG_10027_1	Gj9P976T9	92249
MSTRG_10027_1	Gj9P977T18	64244
MSTRG_10027_1	Gj9P977T23	43783
MSTRG_10027_1	Gj9X976T25	81949
MSTRG_10027_1	Gj9X976T26	75276
MSTRG_10027_1	Gj9X976T27	64712
MSTRG_10027_1	Gj9X976T54	80619
MSTRG_10027_1	Gj9X977T39	47394
MSTRG_10027_1	Gj9X977T59	63399
MSTRG_10027_1	Gj9X977T70	18662
MSTRG_10027_1	Gj9X978T23	100316
MSTRG_10027_1	MSTRG_10022	73149
MSTRG_10027_1	MSTRG_10023	99475
MSTRG_10027_1	MSTRG_10024	9503
MSTRG_10027_1	MSTRG_10025	51035
MSTRG_10027_1	MSTRG_10026	50434
MSTRG_10027_1	MSTRG_10027	429
MSTRG_10027_1	MSTRG_10028	30343
MSTRG_10027_1	MSTRG_10029	53412
MSTRG_10027_1	MSTRG_10030	97435
MSTRG_10027_1	MSTRG_10032	81887
MSTRG_10027_1	MSTRG_10033	88912
MSTRG_10027_1	MSTRG_10038	101628
MSTRG_10028_1	Gj9A976T69	83469
MSTRG_10028_1	Gj9A976T74	53843
MSTRG_10028_1	Gj9A977T101	9234
MSTRG_10028_1	Gj9A977T94	11324
MSTRG_10028_1	Gj9A977T98	40288
MSTRG_10028_1	Gj9A978T79	101749
MSTRG_10028_1	Gj9P976T12	78528
MSTRG_10028_1	Gj9P976T15	96861
MSTRG_10028_1	Gj9P977T18	39592
MSTRG_10028_1	Gj9P977T23	19131
MSTRG_10028_1	Gj9X976T26	99928
MSTRG_10028_1	Gj9X976T27	89364
MSTRG_10028_1	Gj9X977T39	22742
MSTRG_10028_1	Gj9X977T59	38747
MSTRG_10028_1	Gj9X977T70	5990
MSTRG_10028_1	Gj9X978T23	75664
MSTRG_10028_1	MSTRG_10022	97801
MSTRG_10028_1	MSTRG_10024	34155
MSTRG_10028_1	MSTRG_10025	75687
MSTRG_10028_1	MSTRG_10026	25782
MSTRG_10028_1	MSTRG_10027	24223
MSTRG_10028_1	MSTRG_10028	5691
MSTRG_10028_1	MSTRG_10029	28760
MSTRG_10028_1	MSTRG_10030	72783
MSTRG_10028_1	MSTRG_10031	81187
MSTRG_10028_1	MSTRG_10032	57235
MSTRG_10028_1	MSTRG_10033	64260
MSTRG_10028_1	MSTRG_10035	91959
MSTRG_10028_1	MSTRG_10038	76976
MSTRG_100_2	Gj1A19T72	48878
MSTRG_100_2	Gj1A20T76	25144
MSTRG_100_2	Gj1A20T77	34447
MSTRG_100_2	Gj1A20T78	44944
MSTRG_100_2	Gj1A20T79	52028
MSTRG_100_2	Gj1A20T80	60208
MSTRG_100_2	Gj1P18T5	94010
MSTRG_100_2	Gj1P18T7	80003
MSTRG_100_2	Gj1P19T10	16326
MSTRG_100_2	Gj1P19T12	23362
MSTRG_100_2	Gj1P20T10	53886
MSTRG_100_2	Gj1P20T12	67040
MSTRG_100_2	Gj1X19T37	51347
MSTRG_100_2	Gj1X19T39	51525
MSTRG_100_2	MSTRG_100	192
MSTRG_100_2	MSTRG_101	3876
MSTRG_100_2	MSTRG_102	91936
MSTRG_100_2	MSTRG_103	86891
MSTRG_100_2	MSTRG_104	19150
MSTRG_100_2	MSTRG_105	14037
MSTRG_100_2	MSTRG_106	101697
MSTRG_100_2	MSTRG_107	101730
MSTRG_100_2	MSTRG_110	88144
MSTRG_100_2	MSTRG_116	6590
MSTRG_100_2	MSTRG_97	69548
MSTRG_1003_1	Gj10A280T89	31395
MSTRG_1003_1	Gj10A280T92	66083
MSTRG_1003_1	Gj10A280T93	59784
MSTRG_1003_1	Gj10A281T80	40535
MSTRG_1003_1	Gj10A282T44	77559
MSTRG_1003_1	Gj10A282T48	88290
MSTRG_1003_1	Gj10A282T49	91213
MSTRG_1003_1	Gj10P280T16	75672
MSTRG_1003_1	Gj10P280T27	53039
MSTRG_1003_1	Gj10P280T28	45379
MSTRG_1003_1	Gj10P281T17	44216
MSTRG_1003_1	Gj10P281T18	46428
MSTRG_1003_1	Gj10P281T20	18246
MSTRG_1003_1	Gj10X280T47	61429
MSTRG_1003_1	Gj10X280T60	89577
MSTRG_1003_1	Gj10X282T35	87996
MSTRG_1003_1	MSTRG_1000	23127
MSTRG_1003_1	MSTRG_1001	69735
MSTRG_1003_1	MSTRG_1002	5152
MSTRG_1003_1	MSTRG_1003	1426
MSTRG_1003_1	MSTRG_1004	33917
MSTRG_1003_1	MSTRG_1005	65338
MSTRG_1003_1	MSTRG_1006	73138
MSTRG_1003_1	MSTRG_1007	99993
MSTRG_1003_1	MSTRG_1008	48137
MSTRG_1003_1	MSTRG_1009	18386
MSTRG_1003_1	MSTRG_1010	25727
MSTRG_1003_1	MSTRG_996	101659
MSTRG_1003_1	MSTRG_997	83958
MSTRG_1003_1	MSTRG_998	38245
MSTRG_1003_1	MSTRG_999	12438
MSTRG_10036_1	Gj9A978T79	40309
MSTRG_10036_1	Gj9A978T80	34038
MSTRG_10036_1	Gj9A979T101	49278
MSTRG_10036_1	Gj9A979T103	77116
MSTRG_10036_1	Gj9A979T104	78932
MSTRG_10036_1	Gj9A979T106	26553
MSTRG_10036_1	Gj9P979T16	39695
MSTRG_10036_1	Gj9P979T30	102465
MSTRG_10036_1	Gj9X978T23	66394
MSTRG_10036_1	Gj9X979T58	44398
MSTRG_10036_1	Gj9X979T64	80128
MSTRG_10036_1	MSTRG_10030	69275
MSTRG_10036_1	MSTRG_10031	60871
MSTRG_10036_1	MSTRG_10032	84823
MSTRG_10036_1	MSTRG_10033	77798
MSTRG_10036_1	MSTRG_10034	20846
MSTRG_10036_1	MSTRG_10035	50099
MSTRG_10036_1	MSTRG_10036	1701
MSTRG_10036_1	MSTRG_10037	9537
MSTRG_10036_1	MSTRG_10038	65082
MSTRG_10036_1	MSTRG_10039	34948
MSTRG_10036_1	MSTRG_10040	58590
MSTRG_10036_1	MSTRG_10041	62854
MSTRG_10036_1	MSTRG_10042	4924
MSTRG_10036_1	MSTRG_10043	11043
MSTRG_10036_1	MSTRG_10045	93943
MSTRG_10036_1	MSTRG_10046	90746
MSTRG_10036_1	MSTRG_10049	88903
MSTRG_10040_1	Gj9A978T79	98598
MSTRG_10040_1	Gj9A978T80	92327
MSTRG_10040_1	Gj9A979T101	9011
MSTRG_10040_1	Gj9A979T103	18827
MSTRG_10040_1	Gj9A979T104	20643
MSTRG_10040_1	Gj9A979T106	31736
MSTRG_10040_1	Gj9A980T94	97020
MSTRG_10040_1	Gj9P979T16	18594
MSTRG_10040_1	Gj9P979T30	44176
MSTRG_10040_1	Gj9P980T20	100831
MSTRG_10040_1	Gj9X979T58	13891
MSTRG_10040_1	Gj9X979T64	21839
MSTRG_10040_1	Gj9X980T27	75283
MSTRG_10040_1	MSTRG_10034	79135
MSTRG_10040_1	MSTRG_10036	56588
MSTRG_10040_1	MSTRG_10037	67826
MSTRG_10040_1	MSTRG_10039	23341
MSTRG_10040_1	MSTRG_10040	301
MSTRG_10040_1	MSTRG_10041	4565
MSTRG_10040_1	MSTRG_10042	53365
MSTRG_10040_1	MSTRG_10043	47246
MSTRG_10040_1	MSTRG_10044	55196
MSTRG_10040_1	MSTRG_10045	35654
MSTRG_10040_1	MSTRG_10046	32457
MSTRG_10040_1	MSTRG_10047	65052
MSTRG_10040_1	MSTRG_10048	61839
MSTRG_10040_1	MSTRG_10049	30614
MSTRG_10040_1	MSTRG_10050	78083
MSTRG_10040_1	MSTRG_10052	89149
MSTRG_10040_1	MSTRG_10055	83246
MSTRG_10048_1	Gj9A979T101	69263
MSTRG_10048_1	Gj9A979T103	41425
MSTRG_10048_1	Gj9A979T104	39609
MSTRG_10048_1	Gj9A979T106	91988
MSTRG_10048_1	Gj9A980T103	71233
MSTRG_10048_1	Gj9A980T94	36768
MSTRG_10048_1	Gj9A980T95	44642
MSTRG_10048_1	Gj9A980T96	47042
MSTRG_10048_1	Gj9P979T16	78846
MSTRG_10048_1	Gj9P979T30	16076
MSTRG_10048_1	Gj9P980T20	40579
MSTRG_10048_1	Gj9P980T21	56105
MSTRG_10048_1	Gj9X979T58	74143
MSTRG_10048_1	Gj9X979T64	38413
MSTRG_10048_1	Gj9X980T27	15031
MSTRG_10048_1	Gj9X980T34	66833
MSTRG_10048_1	Gj9X980T42	96180
MSTRG_10048_1	Gj9X980T93	99598
MSTRG_10048_1	MSTRG_10039	83593
MSTRG_10048_1	MSTRG_10040	59951
MSTRG_10048_1	MSTRG_10041	55687
MSTRG_10048_1	MSTRG_10043	107498
MSTRG_10048_1	MSTRG_10044	5056
MSTRG_10048_1	MSTRG_10045	24598
MSTRG_10048_1	MSTRG_10046	27795
MSTRG_10048_1	MSTRG_10047	4800
MSTRG_10048_1	MSTRG_10048	1587
MSTRG_10048_1	MSTRG_10049	29638
MSTRG_10048_1	MSTRG_10050	17831
MSTRG_10048_1	MSTRG_10052	28897
MSTRG_10048_1	MSTRG_10053	86773
MSTRG_10048_1	MSTRG_10055	22994
MSTRG_10057_1	Gj9A980T103	68803
MSTRG_10057_1	Gj9A980T95	95394
MSTRG_10057_1	Gj9A980T96	92994
MSTRG_10057_1	Gj9A981T125	51186
MSTRG_10057_1	Gj9A981T126	16181
MSTRG_10057_1	Gj9A981T127	10821
MSTRG_10057_1	Gj9A982T71	63649
MSTRG_10057_1	Gj9A982T74	87707
MSTRG_10057_1	Gj9P980T20	99457
MSTRG_10057_1	Gj9P980T21	83931
MSTRG_10057_1	Gj9P981T19	10921
MSTRG_10057_1	Gj9X980T34	73203
MSTRG_10057_1	Gj9X980T42	43856
MSTRG_10057_1	Gj9X980T93	40438
MSTRG_10057_1	Gj9X981T101	7971
MSTRG_10057_1	Gj9X981T29	34327
MSTRG_10057_1	Gj9X981T43	13510
MSTRG_10057_1	Gj9X981T83	27195
MSTRG_10057_1	Gj9X982T19	75656
MSTRG_10057_1	MSTRG_10051	19715
MSTRG_10057_1	MSTRG_10053	53263
MSTRG_10057_1	MSTRG_10054	23330
MSTRG_10057_1	MSTRG_10056	4373
MSTRG_10057_1	MSTRG_10057	93
MSTRG_10057_1	MSTRG_10058	18265
MSTRG_10057_1	MSTRG_10059	43337
MSTRG_10057_1	MSTRG_10061	34430
MSTRG_10057_1	MSTRG_10062	98351
MSTRG_10057_1	MSTRG_10063	54409
MSTRG_10074_3	Gj9A982T76	98172
MSTRG_10074_3	Gj9A983T107	56483
MSTRG_10074_3	Gj9A983T109	21629
MSTRG_10074_3	Gj9A983T111	11649
MSTRG_10074_3	Gj9A983T114	27639
MSTRG_10074_3	Gj9P983T16	30619
MSTRG_10074_3	Gj9P983T18	24415
MSTRG_10074_3	Gj9P984T9	39195
MSTRG_10074_3	Gj9X983T96	32905
MSTRG_10074_3	Gj9X984T46	87228
MSTRG_10074_3	Gj9X984T58	99534
MSTRG_10074_3	MSTRG_10064	104586
MSTRG_10074_3	MSTRG_10065	92871
MSTRG_10074_3	MSTRG_10066	36535
MSTRG_10074_3	MSTRG_10067	36219
MSTRG_10074_3	MSTRG_10068	83171
MSTRG_10074_3	MSTRG_10069	28370
MSTRG_10074_3	MSTRG_10070	17883
MSTRG_10074_3	MSTRG_10071	51004
MSTRG_10074_3	MSTRG_10072	45297
MSTRG_10074_3	MSTRG_10073	13538
MSTRG_10074_3	MSTRG_10074	7287
MSTRG_10074_3	MSTRG_10075	54283
MSTRG_10074_3	MSTRG_10076	103195
MSTRG_10074_3	MSTRG_10079	65595
MSTRG_10092_1	Gj9A986T70	69620
MSTRG_10092_1	Gj9A986T71	65328
MSTRG_10092_1	Gj9A986T80	47428
MSTRG_10092_1	Gj9A987T40	40118
MSTRG_10092_1	Gj9A987T41	77450
MSTRG_10092_1	Gj9A987T45	18227
MSTRG_10092_1	Gj9A987T46	69085
MSTRG_10092_1	Gj9A988T91	88456
MSTRG_10092_1	Gj9P986T23	18547
MSTRG_10092_1	Gj9P987T12	76760
MSTRG_10092_1	Gj9P987T8	34502
MSTRG_10092_1	Gj9P988T10	95787
MSTRG_10092_1	Gj9P988T11	98318
MSTRG_10092_1	Gj9P988T12	100958
MSTRG_10092_1	MSTRG_10080	91757
MSTRG_10092_1	MSTRG_10081	74069
MSTRG_10092_1	MSTRG_10084	59380
MSTRG_10092_1	MSTRG_10085	49528
MSTRG_10092_1	MSTRG_10086	45612
MSTRG_10092_1	MSTRG_10087	94745
MSTRG_10092_1	MSTRG_10088	13350
MSTRG_10092_1	MSTRG_10089	4115
MSTRG_10092_1	MSTRG_10090	9946
MSTRG_10092_1	MSTRG_10091	23543
MSTRG_10092_1	MSTRG_10092	33
MSTRG_10092_1	MSTRG_10093	26232
MSTRG_10092_1	MSTRG_10094	11359
MSTRG_10092_1	MSTRG_10095	46398
MSTRG_10092_1	MSTRG_10096	83614
MSTRG_10092_1	MSTRG_10097	83677
MSTRG_10118_1	Gj9A991T119	11990
MSTRG_10118_1	Gj9A992T71	72017
MSTRG_10118_1	Gj9A992T73	33933
MSTRG_10118_1	Gj9A992T74	95102
MSTRG_10118_1	Gj9P990T19	84343
MSTRG_10118_1	Gj9P991T13	33114
MSTRG_10118_1	Gj9P991T14	28847
MSTRG_10118_1	Gj9P991T16	18130
MSTRG_10118_1	Gj9P991T20	11268
MSTRG_10118_1	Gj9P992T12	56815
MSTRG_10118_1	Gj9X991T32	56733
MSTRG_10118_1	Gj9X991T91	20708
MSTRG_10118_1	Gj9X992T20	59825
MSTRG_10118_1	Gj9X992T21	64426
MSTRG_10118_1	Gj9X992T23	78956
MSTRG_10118_1	Gj9X992T30	98611
MSTRG_10118_1	Gj9X992T67	67112
MSTRG_10118_1	MSTRG_10111	52941
MSTRG_10118_1	MSTRG_10112	60970
MSTRG_10118_1	MSTRG_10113	45662
MSTRG_10118_1	MSTRG_10114	39300
MSTRG_10118_1	MSTRG_10115	93612
MSTRG_10118_1	MSTRG_10116	22859
MSTRG_10118_1	MSTRG_10117	9409
MSTRG_10118_1	MSTRG_10118	2371
MSTRG_10118_1	MSTRG_10119	59254
MSTRG_10118_1	MSTRG_10120	25887
MSTRG_10118_1	MSTRG_10121	6335
MSTRG_10118_1	MSTRG_10122	101976
MSTRG_1012_1	Gj10A282T44	65651
MSTRG_1012_1	Gj10A282T46	27788
MSTRG_1012_1	Gj10A282T48	54920
MSTRG_1012_1	Gj10A282T49	51997
MSTRG_1012_1	Gj10A282T51	13785
MSTRG_1012_1	Gj10A283T90	27488
MSTRG_1012_1	Gj10A283T91	28741
MSTRG_1012_1	Gj10A283T99	78765
MSTRG_1012_1	Gj10P281T17	98994
MSTRG_1012_1	Gj10P281T18	96782
MSTRG_1012_1	Gj10P283T9	13833
MSTRG_1012_1	Gj10X282T35	55214
MSTRG_1012_1	MSTRG_1005	77872
MSTRG_1012_1	MSTRG_1006	70072
MSTRG_1012_1	MSTRG_1007	43217
MSTRG_1012_1	MSTRG_1008	95073
MSTRG_1012_1	MSTRG_1011	39856
MSTRG_1012_1	MSTRG_1012	243
MSTRG_1012_1	MSTRG_1013	31496
MSTRG_1012_1	MSTRG_1014	8723
MSTRG_1012_1	MSTRG_1015	9538
MSTRG_1012_1	MSTRG_1016	98251
MSTRG_1012_1	MSTRG_1017	60805
MSTRG_1012_1	MSTRG_1019	64112
MSTRG_10128_1	Gj9A993T100	14488
MSTRG_10128_1	Gj9A993T101	8002
MSTRG_10128_1	Gj9A993T95	3625
MSTRG_10128_1	Gj9A993T98	67604
MSTRG_10128_1	Gj9A994T55	11386
MSTRG_10128_1	Gj9A994T57	67682
MSTRG_10128_1	Gj9A994T58	89612
MSTRG_10128_1	Gj9A994T59	100822
MSTRG_10128_1	Gj9P993T14	54359
MSTRG_10128_1	Gj9P993T17	35399
MSTRG_10128_1	Gj9X993T65	54513
MSTRG_10128_1	Gj9X993T67	51781
MSTRG_10128_1	Gj9X993T84	35792
MSTRG_10128_1	Gj9X994T23	51244
MSTRG_10128_1	Gj9X994T24	59013
MSTRG_10128_1	Gj9X994T38	41737
MSTRG_10128_1	Gj9X994T39	73236
MSTRG_10128_1	MSTRG_10122	101262
MSTRG_10128_1	MSTRG_10123	72185
MSTRG_10128_1	MSTRG_10124	6304
MSTRG_10128_1	MSTRG_10125	21390
MSTRG_10128_1	MSTRG_10126	43073
MSTRG_10128_1	MSTRG_10127	5658
MSTRG_10128_1	MSTRG_10128	176
MSTRG_10128_1	MSTRG_10132	84995
MSTRG_10128_1	MSTRG_10133	73949
MSTRG_10128_1	MSTRG_10136	19705
MSTRG_10129_1	Gj9A994T57	56516
MSTRG_10129_1	Gj9A994T58	34586
MSTRG_10129_1	Gj9A994T59	23376
MSTRG_10129_1	Gj9A995T102	9921
MSTRG_10129_1	Gj9A995T104	4287
MSTRG_10129_1	Gj9A995T106	63311
MSTRG_10129_1	Gj9A995T107	84909
MSTRG_10129_1	Gj9E995T2	10769
MSTRG_10129_1	Gj9P995T12	79602
MSTRG_10129_1	Gj9P995T22	83210
MSTRG_10129_1	Gj9P995T7	1191
MSTRG_10129_1	Gj9X994T23	72954
MSTRG_10129_1	Gj9X994T24	65185
MSTRG_10129_1	Gj9X994T38	82461
MSTRG_10129_1	Gj9X994T39	50962
MSTRG_10129_1	MSTRG_10130	13596
MSTRG_10129_1	MSTRG_10131	2407
MSTRG_10129_1	MSTRG_10136	104493
MSTRG_10129_1	MSTRG_10137	32010
MSTRG_1015_1	Gj10A281T80	92870
MSTRG_1015_1	Gj10A282T44	55846
MSTRG_1015_1	Gj10A282T46	17983
MSTRG_1015_1	Gj10A282T48	45115
MSTRG_1015_1	Gj10A282T49	42192
MSTRG_1015_1	Gj10A282T51	3980
MSTRG_1015_1	Gj10A283T90	37293
MSTRG_1015_1	Gj10A283T91	38546
MSTRG_1015_1	Gj10A283T99	88570
MSTRG_1015_1	Gj10P281T17	89189
MSTRG_1015_1	Gj10P281T18	86977
MSTRG_1015_1	Gj10P283T9	23638
MSTRG_1015_1	Gj10X282T35	45409
MSTRG_1015_1	MSTRG_1004	99488
MSTRG_1015_1	MSTRG_1005	68067
MSTRG_1015_1	MSTRG_1006	60267
MSTRG_1015_1	MSTRG_1007	33412
MSTRG_1015_1	MSTRG_1008	85268
MSTRG_1015_1	MSTRG_1011	49661
MSTRG_1015_1	MSTRG_1012	10048
MSTRG_1015_1	MSTRG_1013	41301
MSTRG_1015_1	MSTRG_1014	18528
MSTRG_1015_1	MSTRG_1015	267
MSTRG_1015_1	MSTRG_1017	70610
MSTRG_1015_1	MSTRG_1019	73917
MSTRG_1015_2	Gj10A281T80	92870
MSTRG_1015_2	Gj10A282T44	55846
MSTRG_1015_2	Gj10A282T46	17983
MSTRG_1015_2	Gj10A282T48	45115
MSTRG_1015_2	Gj10A282T49	42192
MSTRG_1015_2	Gj10A282T51	3980
MSTRG_1015_2	Gj10A283T90	37293
MSTRG_1015_2	Gj10A283T91	38546
MSTRG_1015_2	Gj10A283T99	88570
MSTRG_1015_2	Gj10P281T17	89189
MSTRG_1015_2	Gj10P281T18	86977
MSTRG_1015_2	Gj10P283T9	23638
MSTRG_1015_2	Gj10X282T35	45409
MSTRG_1015_2	MSTRG_1004	99488
MSTRG_1015_2	MSTRG_1005	68067
MSTRG_1015_2	MSTRG_1006	60267
MSTRG_1015_2	MSTRG_1007	33412
MSTRG_1015_2	MSTRG_1008	85268
MSTRG_1015_2	MSTRG_1011	49661
MSTRG_1015_2	MSTRG_1012	10048
MSTRG_1015_2	MSTRG_1013	41301
MSTRG_1015_2	MSTRG_1014	18528
MSTRG_1015_2	MSTRG_1015	267
MSTRG_1015_2	MSTRG_1017	70610
MSTRG_1015_2	MSTRG_1019	73917
MSTRG_10161_1	Gj9A1001T116	89040
MSTRG_10161_1	Gj9A1001T137	34483
MSTRG_10161_1	Gj9A1002T72	53562
MSTRG_10161_1	Gj9A1003T41	88732
MSTRG_10161_1	Gj9A1003T42	93565
MSTRG_10161_1	Gj9A1003T43	95265
MSTRG_10161_1	Gj9P1001T12	101541
MSTRG_10161_1	Gj9P1002T14	21532
MSTRG_10161_1	Gj9P1003T10	98369
MSTRG_10161_1	Gj9X1001T94	56312
MSTRG_10161_1	Gj9X1002T26	14316
MSTRG_10161_1	Gj9X1002T59	64293
MSTRG_10161_1	MSTRG_10150	80196
MSTRG_10161_1	MSTRG_10153	66272
MSTRG_10161_1	MSTRG_10155	41626
MSTRG_10161_1	MSTRG_10156	47630
MSTRG_10161_1	MSTRG_10157	17454
MSTRG_10161_1	MSTRG_10158	24260
MSTRG_10161_1	MSTRG_10159	13007
MSTRG_10161_1	MSTRG_10160	2934
MSTRG_10161_1	MSTRG_10161	295
MSTRG_10161_1	MSTRG_10162	16340
MSTRG_10161_1	MSTRG_10163	27246
MSTRG_10161_1	MSTRG_10164	6578
MSTRG_10161_1	MSTRG_10165	38408
MSTRG_10161_1	MSTRG_10166	23031
MSTRG_10161_1	MSTRG_10167	72209
MSTRG_10161_1	MSTRG_10168	105102
MSTRG_10162_2	Gj9A1001T116	105398
MSTRG_10162_2	Gj9A1001T137	50841
MSTRG_10162_2	Gj9A1002T72	37204
MSTRG_10162_2	Gj9A1003T41	72374
MSTRG_10162_2	Gj9A1003T42	77207
MSTRG_10162_2	Gj9A1003T43	78907
MSTRG_10162_2	Gj9P1002T14	5174
MSTRG_10162_2	Gj9P1003T10	82011
MSTRG_10162_2	Gj9X1001T94	72670
MSTRG_10162_2	Gj9X1002T26	30674
MSTRG_10162_2	Gj9X1002T59	47935
MSTRG_10162_2	MSTRG_10150	96554
MSTRG_10162_2	MSTRG_10153	82630
MSTRG_10162_2	MSTRG_10155	57984
MSTRG_10162_2	MSTRG_10156	63988
MSTRG_10162_2	MSTRG_10157	33812
MSTRG_10162_2	MSTRG_10158	40618
MSTRG_10162_2	MSTRG_10159	29365
MSTRG_10162_2	MSTRG_10160	19292
MSTRG_10162_2	MSTRG_10161	16063
MSTRG_10162_2	MSTRG_10162	18
MSTRG_10162_2	MSTRG_10163	10888
MSTRG_10162_2	MSTRG_10164	9780
MSTRG_10162_2	MSTRG_10165	22050
MSTRG_10162_2	MSTRG_10166	6673
MSTRG_10162_2	MSTRG_10167	55851
MSTRG_10162_2	MSTRG_10168	88744
MSTRG_10162_2	MSTRG_10170	96631
MSTRG_10163_1	Gj9A1001T137	61440
MSTRG_10163_1	Gj9A1002T72	26605
MSTRG_10163_1	Gj9A1003T41	61775
MSTRG_10163_1	Gj9A1003T42	66608
MSTRG_10163_1	Gj9A1003T43	68308
MSTRG_10163_1	Gj9P1002T14	5425
MSTRG_10163_1	Gj9P1003T10	71412
MSTRG_10163_1	Gj9X1001T94	83269
MSTRG_10163_1	Gj9X1002T26	41273
MSTRG_10163_1	Gj9X1002T59	37336
MSTRG_10163_1	MSTRG_10153	93229
MSTRG_10163_1	MSTRG_10155	68583
MSTRG_10163_1	MSTRG_10156	74587
MSTRG_10163_1	MSTRG_10157	44411
MSTRG_10163_1	MSTRG_10158	51217
MSTRG_10163_1	MSTRG_10159	39964
MSTRG_10163_1	MSTRG_10160	29891
MSTRG_10163_1	MSTRG_10161	26662
MSTRG_10163_1	MSTRG_10162	10617
MSTRG_10163_1	MSTRG_10163	289
MSTRG_10163_1	MSTRG_10164	20379
MSTRG_10163_1	MSTRG_10165	11451
MSTRG_10163_1	MSTRG_10166	3926
MSTRG_10163_1	MSTRG_10167	45252
MSTRG_10163_1	MSTRG_10168	78145
MSTRG_10163_1	MSTRG_10170	86032
MSTRG_10167_1	Gj9A1002T72	18502
MSTRG_10167_1	Gj9A1003T41	16668
MSTRG_10167_1	Gj9A1003T42	21501
MSTRG_10167_1	Gj9A1003T43	23201
MSTRG_10167_1	Gj9A1003T46	60715
MSTRG_10167_1	Gj9P1002T14	50532
MSTRG_10167_1	Gj9P1003T10	26305
MSTRG_10167_1	Gj9X1002T26	86380
MSTRG_10167_1	Gj9X1002T59	7771
MSTRG_10167_1	MSTRG_10157	89518
MSTRG_10167_1	MSTRG_10158	96324
MSTRG_10167_1	MSTRG_10159	85071
MSTRG_10167_1	MSTRG_10160	74998
MSTRG_10167_1	MSTRG_10161	71769
MSTRG_10167_1	MSTRG_10162	55724
MSTRG_10167_1	MSTRG_10163	44818
MSTRG_10167_1	MSTRG_10164	65486
MSTRG_10167_1	MSTRG_10165	33656
MSTRG_10167_1	MSTRG_10166	49033
MSTRG_10167_1	MSTRG_10167	145
MSTRG_10167_1	MSTRG_10168	33038
MSTRG_10167_1	MSTRG_10169	82103
MSTRG_10167_1	MSTRG_10170	40925
MSTRG_10167_1	MSTRG_10171	94048
MSTRG_10167_1	MSTRG_10172	66015
MSTRG_10167_1	MSTRG_10174	101218
MSTRG_10170_1	Gj9A1002T72	59239
MSTRG_10170_1	Gj9A1003T41	24069
MSTRG_10170_1	Gj9A1003T42	19236
MSTRG_10170_1	Gj9A1003T43	17536
MSTRG_10170_1	Gj9A1003T46	19978
MSTRG_10170_1	Gj9A1004T75	80672
MSTRG_10170_1	Gj9A1004T76	89135
MSTRG_10170_1	Gj9P1002T14	91269
MSTRG_10170_1	Gj9P1003T10	14432
MSTRG_10170_1	Gj9P1004T19	94918
MSTRG_10170_1	Gj9X1002T59	48508
MSTRG_10170_1	MSTRG_10162	96461
MSTRG_10170_1	MSTRG_10163	85555
MSTRG_10170_1	MSTRG_10164	106223
MSTRG_10170_1	MSTRG_10165	74393
MSTRG_10170_1	MSTRG_10166	89770
MSTRG_10170_1	MSTRG_10167	40592
MSTRG_10170_1	MSTRG_10168	7699
MSTRG_10170_1	MSTRG_10169	41366
MSTRG_10170_1	MSTRG_10170	188
MSTRG_10170_1	MSTRG_10171	53311
MSTRG_10170_1	MSTRG_10172	25278
MSTRG_10170_1	MSTRG_10173	64825
MSTRG_10170_1	MSTRG_10174	60481
MSTRG_10170_1	MSTRG_10175	100736
MSTRG_10170_1	MSTRG_10179	69041
MSTRG_10176_1	Gj9A1003T43	101821
MSTRG_10176_1	Gj9A1003T46	64307
MSTRG_10176_1	Gj9A1004T75	3613
MSTRG_10176_1	Gj9A1004T76	4850
MSTRG_10176_1	Gj9A1004T77	28874
MSTRG_10176_1	Gj9A1004T78	44203
MSTRG_10176_1	Gj9A1005T60	100486
MSTRG_10176_1	Gj9E1004T3	23231
MSTRG_10176_1	Gj9P1003T10	98717
MSTRG_10176_1	Gj9P1004T19	10633
MSTRG_10176_1	Gj9X1004T43	40238
MSTRG_10176_1	Gj9X1004T68	71355
MSTRG_10176_1	Gj9X1005T20	99496
MSTRG_10176_1	MSTRG_10168	91984
MSTRG_10176_1	MSTRG_10169	42919
MSTRG_10176_1	MSTRG_10170	84097
MSTRG_10176_1	MSTRG_10171	30974
MSTRG_10176_1	MSTRG_10172	59007
MSTRG_10176_1	MSTRG_10173	19460
MSTRG_10176_1	MSTRG_10174	23804
MSTRG_10176_1	MSTRG_10175	16451
MSTRG_10176_1	MSTRG_10177	60396
MSTRG_10176_1	MSTRG_10178	62053
MSTRG_10176_1	MSTRG_10179	15244
MSTRG_10176_1	MSTRG_10184	80884
MSTRG_10185_1	Gj9A1005T62	60974
MSTRG_10185_1	Gj9A1006T61	30697
MSTRG_10185_1	Gj9A1007T57	51179
MSTRG_10185_1	Gj9A1007T58	78431
MSTRG_10185_1	Gj9P1005T8	90924
MSTRG_10185_1	Gj9P1006T18	37940
MSTRG_10185_1	Gj9P1006T6	53751
MSTRG_10185_1	Gj9P1007T9	60581
MSTRG_10185_1	Gj9X1005T50	56685
MSTRG_10185_1	Gj9X1006T22	52599
MSTRG_10185_1	Gj9X1006T29	19888
MSTRG_10185_1	Gj9X1006T35	48870
MSTRG_10185_1	Gj9X1006T45	27383
MSTRG_10185_1	Gj9X1006T48	34803
MSTRG_10185_1	Gj9X1006T51	43944
MSTRG_10185_1	Gj9X1007T42	100639
MSTRG_10185_1	MSTRG_10180	83814
MSTRG_10185_1	MSTRG_10181	44593
MSTRG_10185_1	MSTRG_10182	37993
MSTRG_10185_1	MSTRG_10183	103969
MSTRG_10185_1	MSTRG_10185	628
MSTRG_10185_1	MSTRG_10186	4765
MSTRG_10185_1	MSTRG_10187	92411
MSTRG_10185_1	MSTRG_10188	47004
MSTRG_10185_1	MSTRG_10189	27093
MSTRG_10185_1	MSTRG_10191	41725
MSTRG_10189_2	Gj9A1005T60	102173
MSTRG_10189_2	Gj9A1005T62	33899
MSTRG_10189_2	Gj9A1006T61	3622
MSTRG_10189_2	Gj9A1007T57	78254
MSTRG_10189_2	Gj9P1005T8	63849
MSTRG_10189_2	Gj9P1006T18	65015
MSTRG_10189_2	Gj9P1006T6	26676
MSTRG_10189_2	Gj9P1007T9	87656
MSTRG_10189_2	Gj9X1005T50	29610
MSTRG_10189_2	Gj9X1006T22	25524
MSTRG_10189_2	Gj9X1006T29	7187
MSTRG_10189_2	Gj9X1006T35	21795
MSTRG_10189_2	Gj9X1006T45	308
MSTRG_10189_2	Gj9X1006T48	61878
MSTRG_10189_2	Gj9X1006T51	71019
MSTRG_10189_2	MSTRG_10180	56739
MSTRG_10189_2	MSTRG_10181	17518
MSTRG_10189_2	MSTRG_10182	10918
MSTRG_10189_2	MSTRG_10183	76894
MSTRG_10189_2	MSTRG_10185	27703
MSTRG_10189_2	MSTRG_10186	31840
MSTRG_10189_2	MSTRG_10188	74079
MSTRG_10189_2	MSTRG_10189	18
MSTRG_10189_2	MSTRG_10191	68800
MSTRG_1019_1	Gj10A282T46	91584
MSTRG_1019_1	Gj10A282T51	77581
MSTRG_1019_1	Gj10A283T90	36308
MSTRG_1019_1	Gj10A283T91	35055
MSTRG_1019_1	Gj10A283T99	14969
MSTRG_1019_1	Gj10A284T86	66901
MSTRG_1019_1	Gj10A284T90	109802
MSTRG_1019_1	Gj10P283T9	49963
MSTRG_1019_1	MSTRG_1011	23940
MSTRG_1019_1	MSTRG_1012	63553
MSTRG_1019_1	MSTRG_1013	32300
MSTRG_1019_1	MSTRG_1014	55073
MSTRG_1019_1	MSTRG_1015	73334
MSTRG_1019_1	MSTRG_1016	34455
MSTRG_1019_1	MSTRG_1017	2991
MSTRG_1019_1	MSTRG_1018	63757
MSTRG_1019_1	MSTRG_1019	316
MSTRG_1019_1	MSTRG_1020	50795
MSTRG_1019_1	MSTRG_1021	69499
MSTRG_1019_1	MSTRG_1022	90585
MSTRG_1019_1	MSTRG_1023	92158
MSTRG_1019_1	MSTRG_1024	79641
MSTRG_1019_1	MSTRG_1025	97868
MSTRG_10215_3	Gj9A1012T93	99721
MSTRG_10215_3	Gj9A1013T79	19685
MSTRG_10215_3	Gj9A1013T82	53655
MSTRG_10215_3	Gj9P1013T14	20211
MSTRG_10215_3	Gj9P1014T15	84580
MSTRG_10215_3	Gj9X1013T29	40965
MSTRG_10215_3	Gj9X1013T44	55104
MSTRG_10215_3	Gj9X1013T65	29794
MSTRG_10215_3	MSTRG_10206	71268
MSTRG_10215_3	MSTRG_10207	78259
MSTRG_10215_3	MSTRG_10208	87175
MSTRG_10215_3	MSTRG_10209	61192
MSTRG_10215_3	MSTRG_10210	47701
MSTRG_10215_3	MSTRG_10211	25008
MSTRG_10215_3	MSTRG_10212	36206
MSTRG_10215_3	MSTRG_10213	5827
MSTRG_10215_3	MSTRG_10214	8598
MSTRG_10215_3	MSTRG_10215	3528
MSTRG_10215_3	MSTRG_10216	19777
MSTRG_10215_3	MSTRG_10217	28201
MSTRG_10215_3	MSTRG_10218	64351
MSTRG_10215_3	MSTRG_10219	80271
MSTRG_10215_3	MSTRG_10220	94849
MSTRG_10215_3	MSTRG_10221	68483
MSTRG_10215_3	MSTRG_10224	100966
MSTRG_10216_1	Gj9A1013T79	39206
MSTRG_10216_1	Gj9A1013T82	73176
MSTRG_10216_1	Gj9A1014T66	101952
MSTRG_10216_1	Gj9P1013T14	39732
MSTRG_10216_1	Gj9P1014T15	65059
MSTRG_10216_1	Gj9X1013T29	60486
MSTRG_10216_1	Gj9X1013T44	74625
MSTRG_10216_1	Gj9X1013T65	49315
MSTRG_10216_1	MSTRG_10206	90789
MSTRG_10216_1	MSTRG_10207	97780
MSTRG_10216_1	MSTRG_10209	80713
MSTRG_10216_1	MSTRG_10210	67222
MSTRG_10216_1	MSTRG_10211	44529
MSTRG_10216_1	MSTRG_10212	55727
MSTRG_10216_1	MSTRG_10213	25348
MSTRG_10216_1	MSTRG_10214	10923
MSTRG_10216_1	MSTRG_10215	23049
MSTRG_10216_1	MSTRG_10216	256
MSTRG_10216_1	MSTRG_10217	8680
MSTRG_10216_1	MSTRG_10218	44830
MSTRG_10216_1	MSTRG_10219	60750
MSTRG_10216_1	MSTRG_10220	75328
MSTRG_10216_1	MSTRG_10221	48962
MSTRG_10216_1	MSTRG_10222	97546
MSTRG_10216_1	MSTRG_10224	81445
MSTRG_10220_1	Gj9A1014T66	27190
MSTRG_10220_1	Gj9A1014T70	46576
MSTRG_10220_1	Gj9A1015T50	68270
MSTRG_10220_1	Gj9P1014T15	9703
MSTRG_10220_1	Gj9P1015T8	58215
MSTRG_10220_1	Gj9X1015T44	103884
MSTRG_10220_1	MSTRG_10213	100110
MSTRG_10220_1	MSTRG_10214	85685
MSTRG_10220_1	MSTRG_10215	97811
MSTRG_10220_1	MSTRG_10216	74506
MSTRG_10220_1	MSTRG_10217	66082
MSTRG_10220_1	MSTRG_10218	29932
MSTRG_10220_1	MSTRG_10219	14012
MSTRG_10220_1	MSTRG_10220	566
MSTRG_10220_1	MSTRG_10221	25800
MSTRG_10220_1	MSTRG_10222	22784
MSTRG_10220_1	MSTRG_10223	32301
MSTRG_10220_1	MSTRG_10224	6683
MSTRG_10220_1	MSTRG_10229	95403
MSTRG_10223_1	Gj9A1014T66	4521
MSTRG_10223_1	Gj9A1014T70	14865
MSTRG_10223_1	Gj9A1015T50	36559
MSTRG_10223_1	Gj9P1014T15	41414
MSTRG_10223_1	Gj9P1015T10	81975
MSTRG_10223_1	Gj9P1015T11	87551
MSTRG_10223_1	Gj9P1015T12	92234
MSTRG_10223_1	Gj9P1015T18	94513
MSTRG_10223_1	Gj9P1015T8	26504
MSTRG_10223_1	Gj9X1015T29	99396
MSTRG_10223_1	Gj9X1015T44	72173
MSTRG_10223_1	MSTRG_10217	97793
MSTRG_10223_1	MSTRG_10218	61643
MSTRG_10223_1	MSTRG_10219	45723
MSTRG_10223_1	MSTRG_10220	31145
MSTRG_10223_1	MSTRG_10221	57511
MSTRG_10223_1	MSTRG_10222	8927
MSTRG_10223_1	MSTRG_10223	590
MSTRG_10223_1	MSTRG_10224	25028
MSTRG_10223_1	MSTRG_10225	78671
MSTRG_10223_1	MSTRG_10226	102579
MSTRG_10223_1	MSTRG_10229	63692
MSTRG_10230_1	Gj9A1015T50	94988
MSTRG_10230_1	Gj9P1015T10	49572
MSTRG_10230_1	Gj9P1015T11	43996
MSTRG_10230_1	Gj9P1015T12	39313
MSTRG_10230_1	Gj9P1015T18	37034
MSTRG_10230_1	Gj9P1015T8	105043
MSTRG_10230_1	Gj9X1015T29	32151
MSTRG_10230_1	Gj9X1015T44	59374
MSTRG_10230_1	MSTRG_10225	52876
MSTRG_10230_1	MSTRG_10226	28968
MSTRG_10230_1	MSTRG_10227	6687
MSTRG_10230_1	MSTRG_10228	13223
MSTRG_10230_1	MSTRG_10229	67855
MSTRG_10230_1	MSTRG_10230	366
MSTRG_10230_1	MSTRG_10231	36010
MSTRG_10230_1	MSTRG_10232	23136
MSTRG_10230_1	MSTRG_10233	58712
MSTRG_10230_1	MSTRG_10234	74952
MSTRG_10230_1	MSTRG_10235	41150
MSTRG_10230_1	MSTRG_10241	92926
MSTRG_10237_1	Gj9A1017T50	7294
MSTRG_10237_1	Gj9A1018T100	82945
MSTRG_10237_1	Gj9A1018T101	85301
MSTRG_10237_1	Gj9A1018T102	86603
MSTRG_10237_1	Gj9A1018T99	68474
MSTRG_10237_1	Gj9P1018T10	87851
MSTRG_10237_1	Gj9X1017T43	56400
MSTRG_10237_1	Gj9X1018T48	90672
MSTRG_10237_1	MSTRG_10228	96192
MSTRG_10237_1	MSTRG_10231	73405
MSTRG_10237_1	MSTRG_10232	86279
MSTRG_10237_1	MSTRG_10233	50703
MSTRG_10237_1	MSTRG_10234	34463
MSTRG_10237_1	MSTRG_10235	68265
MSTRG_10237_1	MSTRG_10236	11035
MSTRG_10237_1	MSTRG_10237	681
MSTRG_10237_1	MSTRG_10238	50431
MSTRG_10237_1	MSTRG_10239	25064
MSTRG_10237_1	MSTRG_10240	89571
MSTRG_10237_1	MSTRG_10241	16489
MSTRG_10237_1	MSTRG_10242	59681
MSTRG_10237_1	MSTRG_10245	102359
MSTRG_10255_1	Gj9A1020T74	102110
MSTRG_10255_1	Gj9A1020T75	71158
MSTRG_10255_1	Gj9A1020T76	64983
MSTRG_10255_1	Gj9A1021T95	69623
MSTRG_10255_1	Gj9P1020T13	15578
MSTRG_10255_1	Gj9P1021T17	60922
MSTRG_10255_1	Gj9P1021T18	66642
MSTRG_10255_1	Gj9X1021T76	8322
MSTRG_10255_1	MSTRG_10251	79282
MSTRG_10255_1	MSTRG_10252	94336
MSTRG_10255_1	MSTRG_10253	19895
MSTRG_10255_1	MSTRG_10254	25036
MSTRG_10255_1	MSTRG_10255	341
MSTRG_10255_1	MSTRG_10256	46535
MSTRG_10255_1	MSTRG_10257	19824
MSTRG_10255_1	MSTRG_10258	6512
MSTRG_10255_1	MSTRG_10259	26096
MSTRG_10255_1	MSTRG_10260	9782
MSTRG_10255_1	MSTRG_10261	84178
MSTRG_10255_1	MSTRG_10262	38471
MSTRG_10255_1	MSTRG_10263	90619
MSTRG_10277_1	Gj9A1022T85	102658
MSTRG_10277_1	Gj9A1022T87	91820
MSTRG_10277_1	Gj9A1022T96	56279
MSTRG_10277_1	Gj9A1022T97	52508
MSTRG_10277_1	Gj9A1023T64	11369
MSTRG_10277_1	Gj9A1023T73	55464
MSTRG_10277_1	Gj9A1024T92	75562
MSTRG_10277_1	Gj9A1024T93	80896
MSTRG_10277_1	Gj9A1024T95	101656
MSTRG_10277_1	Gj9P1022T17	62589
MSTRG_10277_1	Gj9P1023T7	12892
MSTRG_10277_1	Gj9X1022T25	87138
MSTRG_10277_1	Gj9X1022T32	66341
MSTRG_10277_1	Gj9X1023T24	22247
MSTRG_10277_1	Gj9X1023T36	67113
MSTRG_10277_1	Gj9X1023T38	69610
MSTRG_10277_1	MSTRG_10264	38965
MSTRG_10277_1	MSTRG_10265	84960
MSTRG_10277_1	MSTRG_10266	8705
MSTRG_10277_1	MSTRG_10267	24447
MSTRG_10277_1	MSTRG_10268	23321
MSTRG_10277_1	MSTRG_10269	71377
MSTRG_10277_1	MSTRG_10270	37918
MSTRG_10277_1	MSTRG_10271	88764
MSTRG_10277_1	MSTRG_10272	27837
MSTRG_10277_1	MSTRG_10273	21307
MSTRG_10277_1	MSTRG_10276	94446
MSTRG_10277_1	MSTRG_10277	8957
MSTRG_10324_1	Gj9A1030T85	61253
MSTRG_10324_1	Gj9A1030T87	50876
MSTRG_10324_1	Gj9A1030T88	44312
MSTRG_10324_1	Gj9A1031T83	73684
MSTRG_10324_1	Gj9A1031T85	7307
MSTRG_10324_1	Gj9P1030T16	54193
MSTRG_10324_1	Gj9P1030T18	48339
MSTRG_10324_1	Gj9P1030T20	23676
MSTRG_10324_1	Gj9P1030T21	19300
MSTRG_10324_1	Gj9P1030T27	32348
MSTRG_10324_1	Gj9X1030T58	4488
MSTRG_10324_1	Gj9X1030T69	63636
MSTRG_10324_1	Gj9X1031T49	60625
MSTRG_10324_1	Gj9X1031T61	17412
MSTRG_10324_1	MSTRG_10307	101681
MSTRG_10324_1	MSTRG_10308	74115
MSTRG_10324_1	MSTRG_10309	79063
MSTRG_10324_1	MSTRG_10310	65218
MSTRG_10324_1	MSTRG_10311	70658
MSTRG_10324_1	MSTRG_10312	93230
MSTRG_10324_1	MSTRG_10313	40321
MSTRG_10324_1	MSTRG_10320	10223
MSTRG_10324_1	MSTRG_10321	3326
MSTRG_10324_1	MSTRG_10322	15772
MSTRG_10324_1	MSTRG_10323	37082
MSTRG_10324_1	MSTRG_10324	95
MSTRG_10324_1	MSTRG_10325	29017
MSTRG_10324_1	MSTRG_10326	37341
MSTRG_10324_1	MSTRG_10327	65334
MSTRG_10324_1	MSTRG_10328	101439
MSTRG_10324_1	MSTRG_10329	40079
MSTRG_10324_1	MSTRG_10330	46022
MSTRG_10324_1	MSTRG_10332	91042
MSTRG_10324_1	MSTRG_10342	85674
MSTRG_1034_2	Gj10A285T119	99364
MSTRG_1034_2	Gj10A285T126	88001
MSTRG_1034_2	Gj10A285T127	85240
MSTRG_1034_2	Gj10A286T80	33610
MSTRG_1034_2	Gj10A286T81	8698
MSTRG_1034_2	Gj10A286T87	32101
MSTRG_1034_2	Gj10A286T99	36731
MSTRG_1034_2	Gj10A287T104	68498
MSTRG_1034_2	Gj10A287T105	100515
MSTRG_1034_2	Gj10A287T128	86688
MSTRG_1034_2	Gj10P285T20	96158
MSTRG_1034_2	Gj10P285T21	91340
MSTRG_1034_2	Gj10P285T22	82627
MSTRG_1034_2	Gj10X287T47	96635
MSTRG_1034_2	MSTRG_1031	57264
MSTRG_1034_2	MSTRG_1032	41461
MSTRG_1034_2	MSTRG_1033	5984
MSTRG_1034_2	MSTRG_1034	326
MSTRG_1034_2	MSTRG_1035	77593
MSTRG_1034_2	MSTRG_1036	64705
MSTRG_1034_2	MSTRG_1037	32267
MSTRG_1034_2	MSTRG_1038	5278
MSTRG_1034_2	MSTRG_1039	37581
MSTRG_1034_2	MSTRG_1040	50457
MSTRG_1034_2	MSTRG_1041	60232
MSTRG_1034_2	MSTRG_1042	20411
MSTRG_1034_2	MSTRG_1043	15429
MSTRG_1034_2	MSTRG_1044	94518
MSTRG_1034_2	MSTRG_1045	73280
MSTRG_1034_2	MSTRG_1046	102715
MSTRG_1034_2	MSTRG_1047	32915
MSTRG_10358_1	Gj9A1035T100	46923
MSTRG_10358_1	Gj9A1035T101	43833
MSTRG_10358_1	Gj9A1035T102	19094
MSTRG_10358_1	Gj9A1035T116	52991
MSTRG_10358_1	Gj9A1036T86	38308
MSTRG_10358_1	Gj9P1035T15	20471
MSTRG_10358_1	Gj9P1035T17	11456
MSTRG_10358_1	Gj9P1036T13	48306
MSTRG_10358_1	Gj9X1035T55	75079
MSTRG_10358_1	Gj9X1035T76	12888
MSTRG_10358_1	Gj9X1036T38	43649
MSTRG_10358_1	Gj9X1036T68	36340
MSTRG_10358_1	Gj9X1036T71	69105
MSTRG_10358_1	Gj9X1036T84	98907
MSTRG_10358_1	MSTRG_10351	93798
MSTRG_10358_1	MSTRG_10352	106109
MSTRG_10358_1	MSTRG_10353	88070
MSTRG_10358_1	MSTRG_10356	67409
MSTRG_10358_1	MSTRG_10357	60921
MSTRG_10358_1	MSTRG_10358	2056
MSTRG_10358_1	MSTRG_10359	14381
MSTRG_10358_1	MSTRG_10360	62774
MSTRG_10358_1	MSTRG_10361	25524
MSTRG_10358_1	MSTRG_10362	45629
MSTRG_10358_1	MSTRG_10363	54417
MSTRG_10358_1	MSTRG_10364	61544
MSTRG_10358_1	MSTRG_10365	95070
MSTRG_10358_1	MSTRG_10366	76612
MSTRG_10358_1	MSTRG_10370	106412
MSTRG_1036_1	Gj10A285T110	99611
MSTRG_1036_1	Gj10A285T111	93687
MSTRG_1036_1	Gj10A285T112	91292
MSTRG_1036_1	Gj10A285T116	74113
MSTRG_1036_1	Gj10A285T117	69532
MSTRG_1036_1	Gj10A285T118	66294
MSTRG_1036_1	Gj10A285T119	30759
MSTRG_1036_1	Gj10A285T126	19396
MSTRG_1036_1	Gj10A285T127	16635
MSTRG_1036_1	Gj10A286T80	34995
MSTRG_1036_1	Gj10A286T81	59907
MSTRG_1036_1	Gj10A286T87	36504
MSTRG_1036_1	Gj10A286T99	31874
MSTRG_1036_1	Gj10P285T13	72627
MSTRG_1036_1	Gj10P285T17	40464
MSTRG_1036_1	Gj10P285T18	34277
MSTRG_1036_1	Gj10P285T20	27553
MSTRG_1036_1	Gj10P285T21	22735
MSTRG_1036_1	Gj10P285T22	14022
MSTRG_1036_1	Gj10P285T26	60464
MSTRG_1036_1	Gj10P285T27	59828
MSTRG_1036_1	Gj10X285T82	59248
MSTRG_1036_1	Gj10X285T84	36443
MSTRG_1036_1	MSTRG_1027	85388
MSTRG_1036_1	MSTRG_1028	78710
MSTRG_1036_1	MSTRG_1030	52584
MSTRG_1036_1	MSTRG_1031	11341
MSTRG_1036_1	MSTRG_1032	27144
MSTRG_1036_1	MSTRG_1033	62621
MSTRG_1036_1	MSTRG_1034	68279
MSTRG_1036_1	MSTRG_1035	8988
MSTRG_1036_1	MSTRG_1036	3900
MSTRG_1036_1	MSTRG_1037	100872
MSTRG_1036_1	MSTRG_1038	73883
MSTRG_1036_1	MSTRG_1040	18148
MSTRG_1036_1	MSTRG_1042	89016
MSTRG_1036_1	MSTRG_1043	84034
MSTRG_1036_1	MSTRG_1047	101520
MSTRG_10365_1	Gj9A1036T86	56534
MSTRG_10365_1	Gj9A1037T54	51976
MSTRG_10365_1	Gj9P1035T17	106298
MSTRG_10365_1	Gj9P1036T13	46536
MSTRG_10365_1	Gj9X1036T38	51193
MSTRG_10365_1	Gj9X1036T68	58502
MSTRG_10365_1	Gj9X1036T71	25737
MSTRG_10365_1	Gj9X1036T84	4065
MSTRG_10365_1	MSTRG_10358	92786
MSTRG_10365_1	MSTRG_10359	80461
MSTRG_10365_1	MSTRG_10361	69318
MSTRG_10365_1	MSTRG_10362	49213
MSTRG_10365_1	MSTRG_10363	40425
MSTRG_10365_1	MSTRG_10364	33298
MSTRG_10365_1	MSTRG_10365	228
MSTRG_10365_1	MSTRG_10366	18230
MSTRG_10365_1	MSTRG_10367	44857
MSTRG_10365_1	MSTRG_10368	87060
MSTRG_10365_1	MSTRG_10370	11570
MSTRG_10365_1	MSTRG_10372	73970
MSTRG_10365_1	MSTRG_10374	100512
MSTRG_10389_1	Gj9A1039T107	92179
MSTRG_10389_1	Gj9A1039T109	74274
MSTRG_10389_1	Gj9A1040T73	66528
MSTRG_10389_1	Gj9A1040T76	18192
MSTRG_10389_1	Gj9A1041T103	57494
MSTRG_10389_1	Gj9A1041T105	68484
MSTRG_10389_1	Gj9A1041T107	75543
MSTRG_10389_1	Gj9A1041T109	100601
MSTRG_10389_1	Gj9P1039T16	70050
MSTRG_10389_1	Gj9P1040T10	27764
MSTRG_10389_1	Gj9P1041T24	64860
MSTRG_10389_1	Gj9P1041T26	73032
MSTRG_10389_1	Gj9X1039T51	96528
MSTRG_10389_1	Gj9X1040T39	38971
MSTRG_10389_1	Gj9X1041T36	60148
MSTRG_10389_1	MSTRG_10380	89694
MSTRG_10389_1	MSTRG_10384	35386
MSTRG_10389_1	MSTRG_10385	20238
MSTRG_10389_1	MSTRG_10386	57040
MSTRG_10389_1	MSTRG_10387	43974
MSTRG_10389_1	MSTRG_10389	452
MSTRG_10389_1	MSTRG_10390	6704
MSTRG_10389_1	MSTRG_10391	7246
MSTRG_10389_1	MSTRG_10392	53662
MSTRG_10389_1	MSTRG_10393	43647
MSTRG_10389_1	MSTRG_10394	78304
MSTRG_10389_1	MSTRG_10396	22925
MSTRG_10389_1	MSTRG_10397	30399
MSTRG_10389_1	MSTRG_10398	82782
MSTRG_10389_1	MSTRG_10399	89034
MSTRG_10390_1	Gj9A1039T107	85375
MSTRG_10390_1	Gj9A1039T109	67470
MSTRG_10390_1	Gj9A1040T73	59724
MSTRG_10390_1	Gj9A1040T76	11388
MSTRG_10390_1	Gj9A1041T103	64298
MSTRG_10390_1	Gj9A1041T105	75288
MSTRG_10390_1	Gj9A1041T107	82347
MSTRG_10390_1	Gj9P1039T16	63246
MSTRG_10390_1	Gj9P1040T10	20960
MSTRG_10390_1	Gj9P1041T24	71664
MSTRG_10390_1	Gj9P1041T26	79836
MSTRG_10390_1	Gj9X1039T51	89724
MSTRG_10390_1	Gj9X1040T39	32167
MSTRG_10390_1	Gj9X1041T36	66952
MSTRG_10390_1	MSTRG_10380	82890
MSTRG_10390_1	MSTRG_10383	102484
MSTRG_10390_1	MSTRG_10384	28582
MSTRG_10390_1	MSTRG_10385	13434
MSTRG_10390_1	MSTRG_10386	50236
MSTRG_10390_1	MSTRG_10387	37170
MSTRG_10390_1	MSTRG_10389	7256
MSTRG_10390_1	MSTRG_10390	100
MSTRG_10390_1	MSTRG_10391	14050
MSTRG_10390_1	MSTRG_10392	60466
MSTRG_10390_1	MSTRG_10393	50451
MSTRG_10390_1	MSTRG_10394	85108
MSTRG_10390_1	MSTRG_10396	29729
MSTRG_10390_1	MSTRG_10397	37203
MSTRG_10390_1	MSTRG_10398	89586
MSTRG_10390_1	MSTRG_10399	95838
MSTRG_10401_1	Gj9A1041T109	94514
MSTRG_10401_1	Gj9A1042T89	35663
MSTRG_10401_1	Gj9A1042T91	1741
MSTRG_10401_1	Gj9A1042T92	17918
MSTRG_10401_1	Gj9A1042T93	60270
MSTRG_10401_1	Gj9A1042T94	52226
MSTRG_10401_1	Gj9A1043T88	57818
MSTRG_10401_1	Gj9P1041T16	92513
MSTRG_10401_1	Gj9P1041T17	84656
MSTRG_10401_1	Gj9P1041T18	82030
MSTRG_10401_1	Gj9P1041T19	81730
MSTRG_10401_1	Gj9P1041T20	77791
MSTRG_10401_1	Gj9P1043T9	43280
MSTRG_10401_1	Gj9X1041T73	63935
MSTRG_10401_1	Gj9X1042T22	46609
MSTRG_10401_1	Gj9X1042T32	15830
MSTRG_10401_1	Gj9X1042T39	26968
MSTRG_10401_1	Gj9X1042T68	8671
MSTRG_10401_1	Gj9X1042T85	29799
MSTRG_10401_1	MSTRG_10395	74862
MSTRG_10401_1	MSTRG_10399	106081
MSTRG_10401_1	MSTRG_10400	16604
MSTRG_10401_1	MSTRG_10401	182
MSTRG_10401_1	MSTRG_10402	24273
MSTRG_10401_1	MSTRG_10403	7626
MSTRG_10401_1	MSTRG_10404	33175
MSTRG_10401_1	MSTRG_10405	85170
MSTRG_10401_1	MSTRG_10406	90501
MSTRG_10401_1	MSTRG_10407	95757
MSTRG_10401_1	MSTRG_10409	64440
MSTRG_10401_1	MSTRG_10411	103668
MSTRG_10402_1	Gj9A1042T89	58378
MSTRG_10402_1	Gj9A1042T91	24456
MSTRG_10402_1	Gj9A1042T92	4797
MSTRG_10402_1	Gj9A1042T93	82985
MSTRG_10402_1	Gj9A1042T94	74941
MSTRG_10402_1	Gj9A1043T88	35103
MSTRG_10402_1	Gj9P1041T20	100506
MSTRG_10402_1	Gj9P1043T9	20565
MSTRG_10402_1	Gj9X1041T73	86650
MSTRG_10402_1	Gj9X1042T22	69324
MSTRG_10402_1	Gj9X1042T32	6885
MSTRG_10402_1	Gj9X1042T39	4253
MSTRG_10402_1	Gj9X1042T68	31386
MSTRG_10402_1	Gj9X1042T85	7084
MSTRG_10402_1	Gj9X1043T25	93731
MSTRG_10402_1	MSTRG_10395	97577
MSTRG_10402_1	MSTRG_10400	39319
MSTRG_10402_1	MSTRG_10401	22533
MSTRG_10402_1	MSTRG_10402	1558
MSTRG_10402_1	MSTRG_10403	15089
MSTRG_10402_1	MSTRG_10404	10460
MSTRG_10402_1	MSTRG_10405	62455
MSTRG_10402_1	MSTRG_10406	67786
MSTRG_10402_1	MSTRG_10407	73042
MSTRG_10402_1	MSTRG_10408	92737
MSTRG_10402_1	MSTRG_10409	41725
MSTRG_10402_1	MSTRG_10411	80953
MSTRG_10402_1	MSTRG_10413	95064
MSTRG_10402_2	Gj9A1042T89	58378
MSTRG_10402_2	Gj9A1042T91	24456
MSTRG_10402_2	Gj9A1042T92	4797
MSTRG_10402_2	Gj9A1042T93	82985
MSTRG_10402_2	Gj9A1042T94	74941
MSTRG_10402_2	Gj9A1043T88	35103
MSTRG_10402_2	Gj9P1041T20	100506
MSTRG_10402_2	Gj9P1043T9	20565
MSTRG_10402_2	Gj9X1041T73	86650
MSTRG_10402_2	Gj9X1042T22	69324
MSTRG_10402_2	Gj9X1042T32	6885
MSTRG_10402_2	Gj9X1042T39	4253
MSTRG_10402_2	Gj9X1042T68	31386
MSTRG_10402_2	Gj9X1042T85	7084
MSTRG_10402_2	Gj9X1043T25	93731
MSTRG_10402_2	MSTRG_10395	97577
MSTRG_10402_2	MSTRG_10400	39319
MSTRG_10402_2	MSTRG_10401	22533
MSTRG_10402_2	MSTRG_10402	1558
MSTRG_10402_2	MSTRG_10403	15089
MSTRG_10402_2	MSTRG_10404	10460
MSTRG_10402_2	MSTRG_10405	62455
MSTRG_10402_2	MSTRG_10406	67786
MSTRG_10402_2	MSTRG_10407	73042
MSTRG_10402_2	MSTRG_10408	92737
MSTRG_10402_2	MSTRG_10409	41725
MSTRG_10402_2	MSTRG_10411	80953
MSTRG_10402_2	MSTRG_10413	95064
MSTRG_10413_1	Gj9A1042T92	99556
MSTRG_10413_1	Gj9A1043T88	59656
MSTRG_10413_1	Gj9A1044T53	68429
MSTRG_10413_1	Gj9A1044T54	87719
MSTRG_10413_1	Gj9A1044T55	96110
MSTRG_10413_1	Gj9A1044T56	99687
MSTRG_10413_1	Gj9A1044T60	58190
MSTRG_10413_1	Gj9E1043T8	21215
MSTRG_10413_1	Gj9P1043T9	74194
MSTRG_10413_1	Gj9P1044T8	54943
MSTRG_10413_1	Gj9X1042T39	90506
MSTRG_10413_1	Gj9X1042T85	87675
MSTRG_10413_1	Gj9X1043T25	1028
MSTRG_10413_1	Gj9X1043T29	8411
MSTRG_10413_1	Gj9X1044T24	48917
MSTRG_10413_1	Gj9X1044T38	103499
MSTRG_10413_1	MSTRG_10402	93201
MSTRG_10413_1	MSTRG_10404	84299
MSTRG_10413_1	MSTRG_10405	32304
MSTRG_10413_1	MSTRG_10406	26973
MSTRG_10413_1	MSTRG_10407	21717
MSTRG_10413_1	MSTRG_10408	2022
MSTRG_10413_1	MSTRG_10409	53034
MSTRG_10413_1	MSTRG_10410	12473
MSTRG_10413_1	MSTRG_10411	13806
MSTRG_10413_1	MSTRG_10412	26910
MSTRG_10413_1	MSTRG_10413	305
MSTRG_10413_1	MSTRG_10414	41195
MSTRG_10413_1	MSTRG_10415	35579
MSTRG_10413_1	MSTRG_10416	70928
MSTRG_10413_1	MSTRG_10417	66055
MSTRG_10413_2	Gj9A1042T92	99556
MSTRG_10413_2	Gj9A1043T88	59656
MSTRG_10413_2	Gj9A1044T53	68429
MSTRG_10413_2	Gj9A1044T54	87719
MSTRG_10413_2	Gj9A1044T55	96110
MSTRG_10413_2	Gj9A1044T56	99687
MSTRG_10413_2	Gj9A1044T60	58190
MSTRG_10413_2	Gj9E1043T8	21215
MSTRG_10413_2	Gj9P1043T9	74194
MSTRG_10413_2	Gj9P1044T8	54943
MSTRG_10413_2	Gj9X1042T39	90506
MSTRG_10413_2	Gj9X1042T85	87675
MSTRG_10413_2	Gj9X1043T25	1028
MSTRG_10413_2	Gj9X1043T29	8411
MSTRG_10413_2	Gj9X1044T24	48917
MSTRG_10413_2	Gj9X1044T38	103499
MSTRG_10413_2	MSTRG_10402	93201
MSTRG_10413_2	MSTRG_10404	84299
MSTRG_10413_2	MSTRG_10405	32304
MSTRG_10413_2	MSTRG_10406	26973
MSTRG_10413_2	MSTRG_10407	21717
MSTRG_10413_2	MSTRG_10408	2022
MSTRG_10413_2	MSTRG_10409	53034
MSTRG_10413_2	MSTRG_10410	12473
MSTRG_10413_2	MSTRG_10411	13806
MSTRG_10413_2	MSTRG_10412	26910
MSTRG_10413_2	MSTRG_10413	305
MSTRG_10413_2	MSTRG_10414	41195
MSTRG_10413_2	MSTRG_10415	35579
MSTRG_10413_2	MSTRG_10416	70928
MSTRG_10413_2	MSTRG_10417	66055
MSTRG_10423_1	Gj9A1044T53	99996
MSTRG_10423_1	Gj9A1044T54	80706
MSTRG_10423_1	Gj9A1044T55	72315
MSTRG_10423_1	Gj9A1044T56	68738
MSTRG_10423_1	Gj9A1044T57	57422
MSTRG_10423_1	Gj9A1045T116	41458
MSTRG_10423_1	Gj9A1045T122	5007
MSTRG_10423_1	Gj9A1046T89	73311
MSTRG_10423_1	Gj9A1046T93	80464
MSTRG_10423_1	Gj9P1044T23	54916
MSTRG_10423_1	Gj9P1045T25	20134
MSTRG_10423_1	Gj9P1046T9	68064
MSTRG_10423_1	Gj9X1044T38	64926
MSTRG_10423_1	Gj9X1046T77	78996
MSTRG_10423_1	MSTRG_10416	97497
MSTRG_10423_1	MSTRG_10418	51342
MSTRG_10423_1	MSTRG_10419	47957
MSTRG_10423_1	MSTRG_10420	41791
MSTRG_10423_1	MSTRG_10421	21320
MSTRG_10423_1	MSTRG_10422	15409
MSTRG_10423_1	MSTRG_10423	757
MSTRG_10423_1	MSTRG_10424	39419
MSTRG_10423_1	MSTRG_10425	15228
MSTRG_10423_1	MSTRG_10426	12025
MSTRG_10423_1	MSTRG_10427	36529
MSTRG_10423_1	MSTRG_10428	44185
MSTRG_10423_1	MSTRG_10429	26057
MSTRG_10423_1	MSTRG_10430	56093
MSTRG_10423_1	MSTRG_10432	97961
MSTRG_10424_2	Gj9A1044T53	62691
MSTRG_10424_2	Gj9A1044T54	43401
MSTRG_10424_2	Gj9A1044T55	35010
MSTRG_10424_2	Gj9A1044T56	31433
MSTRG_10424_2	Gj9A1044T57	20117
MSTRG_10424_2	Gj9A1044T60	72930
MSTRG_10424_2	Gj9A1045T116	78763
MSTRG_10424_2	Gj9A1045T122	32298
MSTRG_10424_2	Gj9P1044T23	17611
MSTRG_10424_2	Gj9P1044T8	76177
MSTRG_10424_2	Gj9P1045T25	57439
MSTRG_10424_2	Gj9X1044T24	82203
MSTRG_10424_2	Gj9X1044T38	27621
MSTRG_10424_2	MSTRG_10414	89925
MSTRG_10424_2	MSTRG_10415	95541
MSTRG_10424_2	MSTRG_10416	60192
MSTRG_10424_2	MSTRG_10417	65065
MSTRG_10424_2	MSTRG_10418	14037
MSTRG_10424_2	MSTRG_10419	10652
MSTRG_10424_2	MSTRG_10420	4486
MSTRG_10424_2	MSTRG_10421	15985
MSTRG_10424_2	MSTRG_10422	21896
MSTRG_10424_2	MSTRG_10423	38062
MSTRG_10424_2	MSTRG_10424	2114
MSTRG_10424_2	MSTRG_10425	52533
MSTRG_10424_2	MSTRG_10426	49330
MSTRG_10424_2	MSTRG_10427	73834
MSTRG_10424_2	MSTRG_10428	81490
MSTRG_10424_2	MSTRG_10429	63362
MSTRG_10424_2	MSTRG_10430	93398
MSTRG_10429_3	Gj9A1044T56	100548
MSTRG_10429_3	Gj9A1044T57	89232
MSTRG_10429_3	Gj9A1045T116	9648
MSTRG_10429_3	Gj9A1045T122	36817
MSTRG_10429_3	Gj9A1046T89	41501
MSTRG_10429_3	Gj9A1046T92	86076
MSTRG_10429_3	Gj9A1046T93	48654
MSTRG_10429_3	Gj9A1046T94	92801
MSTRG_10429_3	Gj9P1044T23	86726
MSTRG_10429_3	Gj9P1045T25	11676
MSTRG_10429_3	Gj9P1046T9	36254
MSTRG_10429_3	Gj9X1044T38	96736
MSTRG_10429_3	Gj9X1046T77	47186
MSTRG_10429_3	MSTRG_10418	83152
MSTRG_10429_3	MSTRG_10419	79767
MSTRG_10429_3	MSTRG_10420	73601
MSTRG_10429_3	MSTRG_10421	53130
MSTRG_10429_3	MSTRG_10422	47219
MSTRG_10429_3	MSTRG_10423	31053
MSTRG_10429_3	MSTRG_10424	71229
MSTRG_10429_3	MSTRG_10425	16582
MSTRG_10429_3	MSTRG_10426	19785
MSTRG_10429_3	MSTRG_10427	4719
MSTRG_10429_3	MSTRG_10428	12375
MSTRG_10429_3	MSTRG_10429	5753
MSTRG_10429_3	MSTRG_10430	24283
MSTRG_10429_3	MSTRG_10431	79403
MSTRG_10429_3	MSTRG_10432	66151
MSTRG_10429_3	MSTRG_10435	97391
MSTRG_10437_1	Gj9A1046T92	61808
MSTRG_10437_1	Gj9A1046T93	99230
MSTRG_10437_1	Gj9A1046T94	55083
MSTRG_10437_1	Gj9A1047T70	32344
MSTRG_10437_1	Gj9A1048T97	87811
MSTRG_10437_1	Gj9E1047T3	21410
MSTRG_10437_1	Gj9P1046T19	39554
MSTRG_10437_1	Gj9X1046T66	39805
MSTRG_10437_1	Gj9X1047T39	23247
MSTRG_10437_1	Gj9X1047T52	59100
MSTRG_10437_1	Gj9X1048T62	96358
MSTRG_10437_1	MSTRG_10431	68481
MSTRG_10437_1	MSTRG_10432	81733
MSTRG_10437_1	MSTRG_10433	13195
MSTRG_10437_1	MSTRG_10434	11789
MSTRG_10437_1	MSTRG_10435	50493
MSTRG_10437_1	MSTRG_10436	1822
MSTRG_10437_1	MSTRG_10437	301
MSTRG_10437_1	MSTRG_10438	79113
MSTRG_10437_1	MSTRG_10439	52376
MSTRG_10437_1	MSTRG_10440	96047
MSTRG_10437_1	MSTRG_10443	103518
MSTRG_10437_1	MSTRG_10444	62678
MSTRG_10443_1	Gj9A1047T70	71130
MSTRG_10443_1	Gj9A1048T97	15663
MSTRG_10443_1	Gj9E1047T3	82064
MSTRG_10443_1	Gj9X1047T39	80227
MSTRG_10443_1	Gj9X1047T52	44374
MSTRG_10443_1	Gj9X1048T62	7116
MSTRG_10443_1	MSTRG_10434	91685
MSTRG_10443_1	MSTRG_10438	24361
MSTRG_10443_1	MSTRG_10439	51098
MSTRG_10443_1	MSTRG_10440	7427
MSTRG_10443_1	MSTRG_10441	4369
MSTRG_10443_1	MSTRG_10442	41634
MSTRG_10443_1	MSTRG_10443	44
MSTRG_10443_1	MSTRG_10444	40796
MSTRG_10443_1	MSTRG_10445	52117
MSTRG_10443_1	MSTRG_10446	22567
MSTRG_10443_1	MSTRG_10447	57313
MSTRG_10443_1	MSTRG_10448	82148
MSTRG_10443_1	MSTRG_10449	64525
MSTRG_10443_1	MSTRG_10450	73352
MSTRG_10443_1	MSTRG_10451	97762
MSTRG_10443_1	MSTRG_10453	94166
MSTRG_10472_1	Gj9A1051T101	51716
MSTRG_10472_1	Gj9A1051T96	59035
MSTRG_10472_1	Gj9A1052T116	13546
MSTRG_10472_1	Gj9A1052T120	73589
MSTRG_10472_1	Gj9E1051T1	54223
MSTRG_10472_1	Gj9P1051T14	80779
MSTRG_10472_1	Gj9P1051T15	72996
MSTRG_10472_1	Gj9P1051T18	34417
MSTRG_10472_1	Gj9P1052T22	35156
MSTRG_10472_1	Gj9P1052T23	37950
MSTRG_10472_1	Gj9P1052T27	9986
MSTRG_10472_1	Gj9X1052T82	2063
MSTRG_10472_1	Gj9X1052T96	22661
MSTRG_10472_1	MSTRG_10466	90670
MSTRG_10472_1	MSTRG_10467	63468
MSTRG_10472_1	MSTRG_10468	60524
MSTRG_10472_1	MSTRG_10470	97092
MSTRG_10472_1	MSTRG_10471	14743
MSTRG_10472_1	MSTRG_10472	109
MSTRG_10472_1	MSTRG_10473	43289
MSTRG_10472_1	MSTRG_10474	5328
MSTRG_10472_1	MSTRG_10475	8947
MSTRG_10472_1	MSTRG_10476	17785
MSTRG_10472_1	MSTRG_10477	45041
MSTRG_10472_1	MSTRG_10478	61008
MSTRG_10472_1	MSTRG_10479	26272
MSTRG_10472_1	MSTRG_10480	31792
MSTRG_10472_1	MSTRG_10481	93584
MSTRG_10472_1	MSTRG_10482	81018
MSTRG_10472_1	MSTRG_10484	99359
MSTRG_10501_1	Gj9A1054T76	76839
MSTRG_10501_1	Gj9A1055T84	10268
MSTRG_10501_1	Gj9A1055T94	11580
MSTRG_10501_1	Gj9A1056T76	57255
MSTRG_10501_1	Gj9P1054T14	78066
MSTRG_10501_1	Gj9P1055T20	33840
MSTRG_10501_1	Gj9X1056T52	100481
MSTRG_10501_1	MSTRG_10489	84608
MSTRG_10501_1	MSTRG_10490	80944
MSTRG_10501_1	MSTRG_10492	75070
MSTRG_10501_1	MSTRG_10493	71372
MSTRG_10501_1	MSTRG_10494	63772
MSTRG_10501_1	MSTRG_10495	56118
MSTRG_10501_1	MSTRG_10496	90842
MSTRG_10501_1	MSTRG_10497	23224
MSTRG_10501_1	MSTRG_10498	16530
MSTRG_10501_1	MSTRG_10499	30791
MSTRG_10501_1	MSTRG_10500	23278
MSTRG_10501_1	MSTRG_10501	80
MSTRG_10501_1	MSTRG_10502	41622
MSTRG_10501_1	MSTRG_10503	25201
MSTRG_10501_1	MSTRG_10504	31090
MSTRG_10501_1	MSTRG_10505	73488
MSTRG_10501_1	MSTRG_10506	102042
MSTRG_10501_1	MSTRG_10507	65043
MSTRG_10501_1	MSTRG_10509	46185
MSTRG_10527_1	Gj9A1059T85	13235
MSTRG_10527_1	Gj9A1059T87	62803
MSTRG_10527_1	Gj9A1060T133	25627
MSTRG_10527_1	Gj9A1060T134	46811
MSTRG_10527_1	Gj9E1058T2	91658
MSTRG_10527_1	Gj9P1059T12	47276
MSTRG_10527_1	Gj9X1059T38	43703
MSTRG_10527_1	Gj9X1059T71	7578
MSTRG_10527_1	MSTRG_10518	53351
MSTRG_10527_1	MSTRG_10519	89381
MSTRG_10527_1	MSTRG_10520	41890
MSTRG_10527_1	MSTRG_10522	25985
MSTRG_10527_1	MSTRG_10523	20512
MSTRG_10527_1	MSTRG_10524	4671
MSTRG_10527_1	MSTRG_10525	1702
MSTRG_10527_1	MSTRG_10526	13760
MSTRG_10527_1	MSTRG_10527	409
MSTRG_10527_1	MSTRG_10528	30666
MSTRG_10527_1	MSTRG_10529	66525
MSTRG_10527_1	MSTRG_10530	55078
MSTRG_10527_1	MSTRG_10531	75850
MSTRG_10527_1	MSTRG_10532	40272
MSTRG_10527_1	MSTRG_10533	87964
MSTRG_10527_1	MSTRG_10536	96814
MSTRG_10527_1	MSTRG_10537	104689
MSTRG_10538_2	Gj9A1060T133	92878
MSTRG_10538_2	Gj9A1060T134	71694
MSTRG_10538_2	Gj9A1061T109	6421
MSTRG_10538_2	Gj9A1061T111	26942
MSTRG_10538_2	Gj9A1061T112	29419
MSTRG_10538_2	Gj9A1061T113	33134
MSTRG_10538_2	Gj9A1061T114	40081
MSTRG_10538_2	Gj9A1061T115	47172
MSTRG_10538_2	Gj9A1062T112	102334
MSTRG_10538_2	Gj9P1060T23	9524
MSTRG_10538_2	Gj9P1060T24	8854
MSTRG_10538_2	Gj9P1061T20	91096
MSTRG_10538_2	Gj9P1061T21	94518
MSTRG_10538_2	Gj9P1062T11	104721
MSTRG_10538_2	Gj9X1061T101	95921
MSTRG_10538_2	Gj9X1061T85	43209
MSTRG_10538_2	Gj9X1061T98	88857
MSTRG_10538_2	MSTRG_10528	87839
MSTRG_10538_2	MSTRG_10529	51980
MSTRG_10538_2	MSTRG_10530	63427
MSTRG_10538_2	MSTRG_10531	42655
MSTRG_10538_2	MSTRG_10532	78233
MSTRG_10538_2	MSTRG_10533	30541
MSTRG_10538_2	MSTRG_10534	2225
MSTRG_10538_2	MSTRG_10535	4585
MSTRG_10538_2	MSTRG_10536	21691
MSTRG_10538_2	MSTRG_10537	13816
MSTRG_10538_2	MSTRG_10538	197
MSTRG_10538_2	MSTRG_10539	49702
MSTRG_10538_2	MSTRG_10540	62735
MSTRG_10538_2	MSTRG_10541	53044
MSTRG_10538_2	MSTRG_10542	9311
MSTRG_10538_2	MSTRG_10543	71004
MSTRG_10538_2	MSTRG_10544	20744
MSTRG_10538_2	MSTRG_10545	84037
MSTRG_10538_2	MSTRG_10546	78141
MSTRG_10538_2	MSTRG_10547	98835
MSTRG_10539_1	Gj9A1061T109	43035
MSTRG_10539_1	Gj9A1061T111	22514
MSTRG_10539_1	Gj9A1061T112	20037
MSTRG_10539_1	Gj9A1061T113	16322
MSTRG_10539_1	Gj9A1061T114	9375
MSTRG_10539_1	Gj9A1061T115	2284
MSTRG_10539_1	Gj9A1062T105	77347
MSTRG_10539_1	Gj9A1062T112	52878
MSTRG_10539_1	Gj9A1062T114	63918
MSTRG_10539_1	Gj9A1062T116	81636
MSTRG_10539_1	Gj9P1060T23	58980
MSTRG_10539_1	Gj9P1060T24	58310
MSTRG_10539_1	Gj9P1061T20	41640
MSTRG_10539_1	Gj9P1061T21	45062
MSTRG_10539_1	Gj9P1062T11	55265
MSTRG_10539_1	Gj9P1062T14	92529
MSTRG_10539_1	Gj9P1062T15	98913
MSTRG_10539_1	Gj9P1062T23	83354
MSTRG_10539_1	Gj9X1061T101	46465
MSTRG_10539_1	Gj9X1061T85	6247
MSTRG_10539_1	Gj9X1061T98	39401
MSTRG_10539_1	Gj9X1062T83	89026
MSTRG_10539_1	MSTRG_10531	92111
MSTRG_10539_1	MSTRG_10533	79997
MSTRG_10539_1	MSTRG_10534	51681
MSTRG_10539_1	MSTRG_10535	54041
MSTRG_10539_1	MSTRG_10536	71147
MSTRG_10539_1	MSTRG_10537	63272
MSTRG_10539_1	MSTRG_10538	49653
MSTRG_10539_1	MSTRG_10539	246
MSTRG_10539_1	MSTRG_10540	13279
MSTRG_10539_1	MSTRG_10541	3588
MSTRG_10539_1	MSTRG_10542	40145
MSTRG_10539_1	MSTRG_10543	21548
MSTRG_10539_1	MSTRG_10544	28712
MSTRG_10539_1	MSTRG_10545	34581
MSTRG_10539_1	MSTRG_10546	28685
MSTRG_10539_1	MSTRG_10547	49379
MSTRG_10539_1	MSTRG_10548	62608
MSTRG_10539_1	MSTRG_10550	66700
MSTRG_10553_1	Gj9A1062T105	96007
MSTRG_10553_1	Gj9A1062T111	53167
MSTRG_10553_1	Gj9A1062T116	91718
MSTRG_10553_1	Gj9A1062T118	47069
MSTRG_10553_1	Gj9A1062T119	39251
MSTRG_10553_1	Gj9A1063T111	46914
MSTRG_10553_1	Gj9A1063T112	63607
MSTRG_10553_1	Gj9A1064T98	99917
MSTRG_10553_1	Gj9P1062T14	80825
MSTRG_10553_1	Gj9P1062T15	74441
MSTRG_10553_1	Gj9P1062T23	90000
MSTRG_10553_1	Gj9P1063T12	17248
MSTRG_10553_1	Gj9X1062T101	33058
MSTRG_10553_1	Gj9X1062T83	84328
MSTRG_10553_1	Gj9X1063T51	20177
MSTRG_10553_1	MSTRG_10549	63597
MSTRG_10553_1	MSTRG_10551	11840
MSTRG_10553_1	MSTRG_10552	24074
MSTRG_10553_1	MSTRG_10553	4312
MSTRG_10553_1	MSTRG_10554	44774
MSTRG_10553_1	MSTRG_10555	71883
MSTRG_10553_1	MSTRG_10556	79480
MSTRG_10553_1	MSTRG_10557	29148
MSTRG_10553_1	MSTRG_10558	33491
MSTRG_10553_1	MSTRG_10559	87315
MSTRG_10553_1	MSTRG_10564	102958
MSTRG_1056_1	Gj10A288T81	29209
MSTRG_1056_1	Gj10A288T82	17892
MSTRG_1056_1	Gj10A288T88	57552
MSTRG_1056_1	Gj10A289T101	28032
MSTRG_1056_1	Gj10A289T103	101648
MSTRG_1056_1	Gj10A289T106	32100
MSTRG_1056_1	Gj10A289T109	49509
MSTRG_1056_1	Gj10A289T110	60561
MSTRG_1056_1	Gj10A289T112	79249
MSTRG_1056_1	Gj10A289T113	91520
MSTRG_1056_1	Gj10A289T114	98775
MSTRG_1056_1	Gj10P287T27	99145
MSTRG_1056_1	Gj10P288T9	69019
MSTRG_1056_1	Gj10X288T26	54297
MSTRG_1056_1	Gj10X288T57	61935
MSTRG_1056_1	Gj10X288T64	39251
MSTRG_1056_1	Gj10X289T33	54931
MSTRG_1056_1	MSTRG_1049	94702
MSTRG_1056_1	MSTRG_1050	101534
MSTRG_1056_1	MSTRG_1052	87572
MSTRG_1056_1	MSTRG_1053	26539
MSTRG_1056_1	MSTRG_1054	47955
MSTRG_1056_1	MSTRG_1055	3969
MSTRG_1056_1	MSTRG_1056	338
MSTRG_1056_1	MSTRG_1057	13602
MSTRG_1056_1	MSTRG_1058	5879
MSTRG_1056_1	MSTRG_1059	21608
MSTRG_1056_1	MSTRG_1060	57768
MSTRG_1056_1	MSTRG_1061	35746
MSTRG_1056_1	MSTRG_1062	11834
MSTRG_1056_1	MSTRG_1068	73089
MSTRG_10563_1	Gj9A1063T111	102824
MSTRG_10563_1	Gj9A1063T112	86131
MSTRG_10563_1	Gj9A1064T101	13136
MSTRG_10563_1	Gj9A1064T108	14178
MSTRG_10563_1	Gj9A1064T110	18930
MSTRG_10563_1	Gj9A1064T98	49821
MSTRG_10563_1	Gj9A1064T99	34427
MSTRG_10563_1	Gj9A1065T81	100552
MSTRG_10563_1	Gj9P1065T13	91131
MSTRG_10563_1	Gj9X1064T35	6025
MSTRG_10563_1	MSTRG_10555	77855
MSTRG_10563_1	MSTRG_10556	70258
MSTRG_10563_1	MSTRG_10559	62423
MSTRG_10563_1	MSTRG_10560	22418
MSTRG_10563_1	MSTRG_10561	28839
MSTRG_10563_1	MSTRG_10562	5871
MSTRG_10563_1	MSTRG_10563	198
MSTRG_10563_1	MSTRG_10564	46780
MSTRG_10563_1	MSTRG_10565	26071
MSTRG_10563_1	MSTRG_10566	34332
MSTRG_10563_1	MSTRG_10567	46644
MSTRG_10563_1	MSTRG_10568	57162
MSTRG_10563_1	MSTRG_10573	72623
MSTRG_10564_2	Gj9A1063T111	61238
MSTRG_10564_2	Gj9A1063T112	44545
MSTRG_10564_2	Gj9A1064T101	54722
MSTRG_10564_2	Gj9A1064T108	27408
MSTRG_10564_2	Gj9A1064T110	60516
MSTRG_10564_2	Gj9A1064T98	8235
MSTRG_10564_2	Gj9A1064T99	7159
MSTRG_10564_2	Gj9X1063T51	87975
MSTRG_10564_2	Gj9X1064T35	35561
MSTRG_10564_2	MSTRG_10551	96312
MSTRG_10564_2	MSTRG_10553	103840
MSTRG_10564_2	MSTRG_10554	63378
MSTRG_10564_2	MSTRG_10555	36269
MSTRG_10564_2	MSTRG_10556	28672
MSTRG_10564_2	MSTRG_10557	79004
MSTRG_10564_2	MSTRG_10558	74661
MSTRG_10564_2	MSTRG_10559	20837
MSTRG_10564_2	MSTRG_10560	19168
MSTRG_10564_2	MSTRG_10561	12747
MSTRG_10564_2	MSTRG_10562	47457
MSTRG_10564_2	MSTRG_10563	41784
MSTRG_10564_2	MSTRG_10564	5194
MSTRG_10564_2	MSTRG_10565	67657
MSTRG_10564_2	MSTRG_10566	75918
MSTRG_10564_2	MSTRG_10567	88230
MSTRG_10564_2	MSTRG_10568	98748
MSTRG_10568_2	Gj9A1064T101	45716
MSTRG_10568_2	Gj9A1064T108	73030
MSTRG_10568_2	Gj9A1064T110	39922
MSTRG_10568_2	Gj9A1064T99	93279
MSTRG_10568_2	Gj9A1065T81	41700
MSTRG_10568_2	Gj9P1065T13	32279
MSTRG_10568_2	Gj9X1064T35	64877
MSTRG_10568_2	MSTRG_10560	81270
MSTRG_10568_2	MSTRG_10561	87691
MSTRG_10568_2	MSTRG_10562	52981
MSTRG_10568_2	MSTRG_10563	58654
MSTRG_10568_2	MSTRG_10564	105632
MSTRG_10568_2	MSTRG_10565	32781
MSTRG_10568_2	MSTRG_10566	24520
MSTRG_10568_2	MSTRG_10567	12208
MSTRG_10568_2	MSTRG_10568	1690
MSTRG_10568_2	MSTRG_10569	63614
MSTRG_10568_2	MSTRG_10570	68530
MSTRG_10568_2	MSTRG_10571	59046
MSTRG_10568_2	MSTRG_10572	73221
MSTRG_10568_2	MSTRG_10573	13771
MSTRG_10568_2	MSTRG_10575	75635
MSTRG_10568_2	MSTRG_10579	94283
MSTRG_10568_2	MSTRG_10580	96995
MSTRG_10603_1	Gj9A1068T87	96077
MSTRG_10603_1	Gj9A1068T88	78555
MSTRG_10603_1	Gj9A1068T89	73062
MSTRG_10603_1	Gj9A1068T91	31366
MSTRG_10603_1	Gj9A1069T130	27898
MSTRG_10603_1	Gj9A1069T132	19864
MSTRG_10603_1	Gj9A1069T133	23541
MSTRG_10603_1	Gj9A1069T136	60445
MSTRG_10603_1	Gj9P1068T22	36603
MSTRG_10603_1	Gj9P1069T11	26728
MSTRG_10603_1	Gj9P1069T25	33085
MSTRG_10603_1	Gj9X1068T33	99056
MSTRG_10603_1	Gj9X1069T117	70559
MSTRG_10603_1	Gj9X1069T34	8070
MSTRG_10603_1	MSTRG_10597	83172
MSTRG_10603_1	MSTRG_10599	65117
MSTRG_10603_1	MSTRG_10600	60423
MSTRG_10603_1	MSTRG_10601	40501
MSTRG_10603_1	MSTRG_10602	2550
MSTRG_10603_1	MSTRG_10603	371
MSTRG_10603_1	MSTRG_10604	9613
MSTRG_10603_1	MSTRG_10605	47291
MSTRG_10603_1	MSTRG_10606	16841
MSTRG_10603_1	MSTRG_10607	10806
MSTRG_10603_1	MSTRG_10608	29324
MSTRG_10603_1	MSTRG_10609	57134
MSTRG_10603_1	MSTRG_10610	63338
MSTRG_10603_1	MSTRG_10611	88572
MSTRG_10603_1	MSTRG_10612	95825
MSTRG_10603_1	MSTRG_10613	40556
MSTRG_10603_1	MSTRG_10617	102023
MSTRG_10605_2	Gj9A1067T66	81250
MSTRG_10605_2	Gj9A1068T87	40971
MSTRG_10605_2	Gj9A1068T88	23449
MSTRG_10605_2	Gj9A1068T89	17956
MSTRG_10605_2	Gj9A1068T91	23740
MSTRG_10605_2	Gj9A1069T130	27208
MSTRG_10605_2	Gj9A1069T132	74970
MSTRG_10605_2	Gj9A1069T133	78647
MSTRG_10605_2	Gj9P1068T22	18503
MSTRG_10605_2	Gj9P1069T11	28378
MSTRG_10605_2	Gj9P1069T25	88191
MSTRG_10605_2	Gj9X1068T29	58257
MSTRG_10605_2	Gj9X1068T33	43950
MSTRG_10605_2	Gj9X1068T54	61036
MSTRG_10605_2	Gj9X1069T34	63176
MSTRG_10605_2	MSTRG_10592	95640
MSTRG_10605_2	MSTRG_10593	56686
MSTRG_10605_2	MSTRG_10594	84271
MSTRG_10605_2	MSTRG_10595	55330
MSTRG_10605_2	MSTRG_10596	70262
MSTRG_10605_2	MSTRG_10597	28066
MSTRG_10605_2	MSTRG_10598	51306
MSTRG_10605_2	MSTRG_10599	10011
MSTRG_10605_2	MSTRG_10600	5317
MSTRG_10605_2	MSTRG_10601	14605
MSTRG_10605_2	MSTRG_10602	52556
MSTRG_10605_2	MSTRG_10603	55477
MSTRG_10605_2	MSTRG_10604	64719
MSTRG_10605_2	MSTRG_10605	7815
MSTRG_10605_2	MSTRG_10606	71947
MSTRG_10605_2	MSTRG_10607	44300
MSTRG_10605_2	MSTRG_10608	84430
MSTRG_10605_2	MSTRG_10613	95662
MSTRG_1061_1	Gj10A288T81	64753
MSTRG_1061_1	Gj10A288T82	53436
MSTRG_1061_1	Gj10A288T88	93096
MSTRG_1061_1	Gj10A289T101	7512
MSTRG_1061_1	Gj10A289T103	66104
MSTRG_1061_1	Gj10A289T106	3444
MSTRG_1061_1	Gj10A289T109	13965
MSTRG_1061_1	Gj10A289T110	25017
MSTRG_1061_1	Gj10A289T112	43705
MSTRG_1061_1	Gj10A289T113	55976
MSTRG_1061_1	Gj10A289T114	63231
MSTRG_1061_1	Gj10A290T97	80857
MSTRG_1061_1	Gj10A290T98	93493
MSTRG_1061_1	Gj10P290T10	84529
MSTRG_1061_1	Gj10P290T11	91174
MSTRG_1061_1	Gj10P290T12	92263
MSTRG_1061_1	Gj10P290T9	83339
MSTRG_1061_1	Gj10X288T26	89841
MSTRG_1061_1	Gj10X288T57	97479
MSTRG_1061_1	Gj10X288T64	74795
MSTRG_1061_1	Gj10X289T33	19387
MSTRG_1061_1	MSTRG_1053	62083
MSTRG_1061_1	MSTRG_1054	83499
MSTRG_1061_1	MSTRG_1055	39513
MSTRG_1061_1	MSTRG_1056	35206
MSTRG_1061_1	MSTRG_1057	49146
MSTRG_1061_1	MSTRG_1058	29665
MSTRG_1061_1	MSTRG_1059	13936
MSTRG_1061_1	MSTRG_1060	22224
MSTRG_1061_1	MSTRG_1061	202
MSTRG_1061_1	MSTRG_1062	23710
MSTRG_1061_1	MSTRG_1063	74101
MSTRG_1061_1	MSTRG_1068	37545
MSTRG_1064_1	Gj10A289T103	75907
MSTRG_1064_1	Gj10A289T112	98306
MSTRG_1064_1	Gj10A289T113	86035
MSTRG_1064_1	Gj10A289T114	78780
MSTRG_1064_1	Gj10A290T101	25475
MSTRG_1064_1	Gj10A290T97	61154
MSTRG_1064_1	Gj10A290T98	48518
MSTRG_1064_1	Gj10A290T99	33941
MSTRG_1064_1	Gj10A291T78	40855
MSTRG_1064_1	Gj10A291T80	72007
MSTRG_1064_1	Gj10P290T10	57482
MSTRG_1064_1	Gj10P290T11	50837
MSTRG_1064_1	Gj10P290T12	49748
MSTRG_1064_1	Gj10P290T9	58672
MSTRG_1064_1	Gj10X290T81	11146
MSTRG_1064_1	Gj10X290T86	3555
MSTRG_1064_1	MSTRG_1063	67910
MSTRG_1064_1	MSTRG_1065	38607
MSTRG_1064_1	MSTRG_1066	24807
MSTRG_1064_1	MSTRG_1067	7767
MSTRG_1064_1	MSTRG_1068	104466
MSTRG_1064_1	MSTRG_1069	33415
MSTRG_1064_1	MSTRG_1070	62337
MSTRG_1064_1	MSTRG_1071	47635
MSTRG_1064_1	MSTRG_1072	68043
MSTRG_1064_1	MSTRG_1073	68101
MSTRG_1064_1	MSTRG_1077	74497
MSTRG_10645_1	Gj9A1074T98	100251
MSTRG_10645_1	Gj9A1075T102	28542
MSTRG_10645_1	Gj9A1075T103	13135
MSTRG_10645_1	Gj9A1075T105	62150
MSTRG_10645_1	Gj9A1075T106	56282
MSTRG_10645_1	Gj9A1075T107	55590
MSTRG_10645_1	Gj9A1075T108	34846
MSTRG_10645_1	Gj9A1075T112	17209
MSTRG_10645_1	Gj9A1075T57	46165
MSTRG_10645_1	Gj9A1076T84	73682
MSTRG_10645_1	Gj9P1074T13	91590
MSTRG_10645_1	Gj9P1075T30	26180
MSTRG_10645_1	Gj9P1076T20	59220
MSTRG_10645_1	Gj9X1074T57	79975
MSTRG_10645_1	Gj9X1075T57	67028
MSTRG_10645_1	MSTRG_10640	86160
MSTRG_10645_1	MSTRG_10641	76661
MSTRG_10645_1	MSTRG_10642	16729
MSTRG_10645_1	MSTRG_10644	6962
MSTRG_10645_1	MSTRG_10645	279
MSTRG_10645_1	MSTRG_10646	7073
MSTRG_10645_1	MSTRG_10647	39575
MSTRG_10645_1	MSTRG_10648	29787
MSTRG_10645_1	MSTRG_10649	3945
MSTRG_10645_1	MSTRG_10650	47128
MSTRG_10645_1	MSTRG_10651	53660
MSTRG_10645_1	MSTRG_10652	51548
MSTRG_10645_1	MSTRG_10653	55126
MSTRG_10645_1	MSTRG_10654	66114
MSTRG_10645_1	MSTRG_10655	83441
MSTRG_10645_1	MSTRG_10658	88015
MSTRG_10666_1	Gj9A1076T84	76426
MSTRG_10666_1	Gj9A1077T92	12336
MSTRG_10666_1	Gj9P1076T20	90888
MSTRG_10666_1	Gj9X1076T31	36181
MSTRG_10666_1	Gj9X1076T65	31668
MSTRG_10666_1	Gj9X1077T23	25508
MSTRG_10666_1	Gj9X1077T27	44812
MSTRG_10666_1	Gj9X1077T32	57032
MSTRG_10666_1	Gj9X1077T53	19790
MSTRG_10666_1	Gj9X1077T59	19309
MSTRG_10666_1	Gj9X1078T18	85258
MSTRG_10666_1	Gj9X1078T38	92905
MSTRG_10666_1	Gj9X1078T40	93030
MSTRG_10666_1	MSTRG_10651	96448
MSTRG_10666_1	MSTRG_10652	98560
MSTRG_10666_1	MSTRG_10653	94982
MSTRG_10666_1	MSTRG_10654	83994
MSTRG_10666_1	MSTRG_10655	66667
MSTRG_10666_1	MSTRG_10656	29476
MSTRG_10666_1	MSTRG_10657	28055
MSTRG_10666_1	MSTRG_10658	62093
MSTRG_10666_1	MSTRG_10659	13688
MSTRG_10666_1	MSTRG_10660	12866
MSTRG_10666_1	MSTRG_10661	12785
MSTRG_10666_1	MSTRG_10662	17875
MSTRG_10666_1	MSTRG_10663	10355
MSTRG_10666_1	MSTRG_10664	27611
MSTRG_10666_1	MSTRG_10665	49582
MSTRG_10666_1	MSTRG_10666	656
MSTRG_10666_1	MSTRG_10667	65478
MSTRG_10666_1	MSTRG_10668	37812
MSTRG_10666_1	MSTRG_10669	38402
MSTRG_10666_1	MSTRG_10671	96196
MSTRG_10666_1	MSTRG_10672	71536
MSTRG_10679_1	Gj9A1079T91	89053
MSTRG_10679_1	Gj9A1079T94	82235
MSTRG_10679_1	Gj9A1079T96	51416
MSTRG_10679_1	Gj9A1080T103	21938
MSTRG_10679_1	Gj9A1080T109	15803
MSTRG_10679_1	Gj9A1080T111	81553
MSTRG_10679_1	Gj9A1081T125	98216
MSTRG_10679_1	Gj9P1079T14	67596
MSTRG_10679_1	Gj9P1080T19	8804
MSTRG_10679_1	Gj9P1080T25	72270
MSTRG_10679_1	Gj9X1079T25	40584
MSTRG_10679_1	Gj9X1079T77	29661
MSTRG_10679_1	Gj9X1079T89	14374
MSTRG_10679_1	Gj9X1080T40	36576
MSTRG_10679_1	MSTRG_10673	55332
MSTRG_10679_1	MSTRG_10674	34941
MSTRG_10679_1	MSTRG_10676	46225
MSTRG_10679_1	MSTRG_10678	24684
MSTRG_10679_1	MSTRG_10679	603
MSTRG_10679_1	MSTRG_10680	25980
MSTRG_10679_1	MSTRG_10681	10376
MSTRG_10679_1	MSTRG_10682	1547
MSTRG_10679_1	MSTRG_10683	64384
MSTRG_10679_1	MSTRG_10684	86996
MSTRG_10679_1	MSTRG_10685	92427
MSTRG_10679_1	MSTRG_10686	54077
MSTRG_10691_2	Gj9A1080T111	52123
MSTRG_10691_2	Gj9A1081T123	42476
MSTRG_10691_2	Gj9A1081T125	35460
MSTRG_10691_2	Gj9A1082T79	65186
MSTRG_10691_2	Gj9A1082T85	78175
MSTRG_10691_2	Gj9P1080T25	61406
MSTRG_10691_2	Gj9P1081T14	10341
MSTRG_10691_2	Gj9P1081T16	30132
MSTRG_10691_2	Gj9P1081T24	36009
MSTRG_10691_2	Gj9X1080T40	97100
MSTRG_10691_2	Gj9X1081T45	18171
MSTRG_10691_2	Gj9X1081T50	2152
MSTRG_10691_2	Gj9X1081T66	17694
MSTRG_10691_2	MSTRG_10683	69292
MSTRG_10691_2	MSTRG_10684	46680
MSTRG_10691_2	MSTRG_10685	41249
MSTRG_10691_2	MSTRG_10686	79599
MSTRG_10691_2	MSTRG_10687	24198
MSTRG_10691_2	MSTRG_10688	51180
MSTRG_10691_2	MSTRG_10689	5231
MSTRG_10691_2	MSTRG_10690	57154
MSTRG_10691_2	MSTRG_10691	1655
MSTRG_10691_2	MSTRG_10692	74971
MSTRG_10691_2	MSTRG_10693	12048
MSTRG_10691_2	MSTRG_10694	70589
MSTRG_10691_2	MSTRG_10696	80321
MSTRG_10691_2	MSTRG_10697	93383
MSTRG_10698_1	Gj9A1081T123	67651
MSTRG_10698_1	Gj9A1082T79	44941
MSTRG_10698_1	Gj9A1082T85	31952
MSTRG_10698_1	Gj9A1083T101	51698
MSTRG_10698_1	Gj9A1083T89	47720
MSTRG_10698_1	Gj9E1082T4	29976
MSTRG_10698_1	Gj9P1081T14	99786
MSTRG_10698_1	Gj9P1081T16	79995
MSTRG_10698_1	Gj9P1081T24	74118
MSTRG_10698_1	Gj9P1083T15	56747
MSTRG_10698_1	Gj9P1083T17	76405
MSTRG_10698_1	Gj9P1083T26	81795
MSTRG_10698_1	Gj9P1083T28	98511
MSTRG_10698_1	Gj9P1083T29	99173
MSTRG_10698_1	Gj9X1081T66	92433
MSTRG_10698_1	Gj9X1082T59	38871
MSTRG_10698_1	MSTRG_10688	58947
MSTRG_10698_1	MSTRG_10690	52973
MSTRG_10698_1	MSTRG_10692	35156
MSTRG_10698_1	MSTRG_10694	39538
MSTRG_10698_1	MSTRG_10695	6084
MSTRG_10698_1	MSTRG_10696	29806
MSTRG_10698_1	MSTRG_10697	16744
MSTRG_10698_1	MSTRG_10698	138
MSTRG_10698_1	MSTRG_10699	11069
MSTRG_10698_1	MSTRG_10700	4943
MSTRG_10698_1	MSTRG_10701	15265
MSTRG_10698_1	MSTRG_10702	34289
MSTRG_10698_1	MSTRG_10703	68607
MSTRG_10698_1	MSTRG_10704	94810
MSTRG_10698_1	MSTRG_10705	61197
MSTRG_10702_1	Gj9A1081T123	101739
MSTRG_10702_1	Gj9A1082T79	79029
MSTRG_10702_1	Gj9A1082T85	66040
MSTRG_10702_1	Gj9A1083T101	17610
MSTRG_10702_1	Gj9A1083T89	13632
[truncated: 20,208 more rows]
