# Supplementary material for: Integrated SMRT and Illumina Sequencing Provide New Insights into Crocin Biosynthesis of Gardenia jasminoides
Source: Int J Mol Sci. 2022 Jun 5;23(11):6321. doi: 10.3390/ijms23116321 (PMC9181021; doi:10.3390/ijms23116321)
Supplement: Supplementary file 1 [file ijms-23-06321-s001.zip › Table S4.xlsx]

## Sheet: Table S4
lncRNA	mRNA	Correlation	P value	P.asjust	Gene
MSTRG_100_2	Gj6A76T33_mRNA1	0.906001	4.92703e-05	0.0111095	Gj6A76T33
MSTRG_100_2	MSTRG_3056_1	-0.911833	3.61298e-05	0.00962674	MSTRG_3056
MSTRG_10003_1	Gj10A252T47_mRNA1	0.940556	5.28784e-06	0.00369759	Gj10A252T47
MSTRG_10003_1	Gj10A302T77_mRNA1	0.919597	2.30951e-05	0.00776156	Gj10A302T77
MSTRG_10003_1	Gj11A393T55_mRNA1	0.9035	5.59406e-05	0.0117649	MSTRG_1584
MSTRG_10003_1	Gj11X299T49_mRNA1	0.968134	2.45283e-07	0.000594223	Gj11X299T49
MSTRG_10003_1	Gj1A38T66_mRNA1	0.966165	3.29951e-07	0.00071832	Gj1A38T66
MSTRG_10003_1	Gj1A70T88_mRNA1	0.917994	2.54204e-05	0.00812332	Gj1A70T88
MSTRG_10003_1	Gj1X514T21_mRNA1	0.944823	3.66999e-06	0.00306658	MSTRG_599
MSTRG_10003_1	Gj1X519T74_mRNA1	0.917977	2.54453e-05	0.00812706	Gj1X519T74
MSTRG_10003_1	Gj2A311T50_mRNA1	0.913653	3.2654e-05	0.00917036	MSTRG_2115
MSTRG_10003_1	Gj2A443T44_mRNA1	-0.925468	1.59675e-05	0.00645938	Gj2A443T44
MSTRG_10003_1	Gj2P343T4_mRNA1	0.912816	3.4219e-05	0.00937751	Gj2P343T4
MSTRG_10003_1	Gj3A17T31_mRNA1	0.908637	4.29347e-05	0.0104381	Gj3A17T31
MSTRG_10003_1	Gj3A222T36_mRNA1	0.991112	4.3031e-10	6.15717e-06	Gj3A222T36
MSTRG_10003_1	Gj3A288T88_mRNA1	0.94227	4.58134e-06	0.00343791	Gj3A288T88
MSTRG_10003_1	Gj3X348T61_mRNA1	0.907335	4.59769e-05	0.0107673	Gj3X348T61
MSTRG_10003_1	Gj4X190T63_mRNA1	0.946712	3.09326e-06	0.00279245	Gj4X190T63
MSTRG_10003_1	Gj4X425T13_mRNA1	0.903919	5.47755e-05	0.0116503	Gj4X425T13
MSTRG_10003_1	Gj4X92T1_mRNA1	0.929613	1.20803e-05	0.00563574	Gj4X92T1
MSTRG_10003_1	Gj5A86T32_mRNA1	0.921396	2.06872e-05	0.00735737	MSTRG_3845
MSTRG_10003_1	Gj5A97T27_mRNA1	0.936997	7.02925e-06	0.00428266	Gj5A97T27
MSTRG_10003_1	Gj5X299T77_mRNA1	0.911012	3.77907e-05	0.00983785	Gj5X299T77
MSTRG_10003_1	Gj6P55T0_mRNA1	0.90308	5.71281e-05	0.0118797	Gj6P55T0
MSTRG_10003_1	Gj7A172T57_mRNA1	0.958174	9.39679e-07	0.00138307	Gj7A172T57
MSTRG_10003_1	Gj7A275T27_mRNA1	0.91035	3.91717e-05	0.0100061	Gj7A275T27
MSTRG_10003_1	Gj7A326T41_mRNA1	0.903525	5.58713e-05	0.0117582	Gj7A326T41
MSTRG_10003_1	Gj7P389T18_mRNA1	0.950531	2.14673e-06	0.00226577	Gj7P389T18
MSTRG_10003_1	Gj7P44T18_mRNA1	0.935841	7.68276e-06	0.00448412	Gj7P44T18
MSTRG_10003_1	Gj7P49T7_mRNA1	0.916035	2.85079e-05	0.00859115	Gj7P49T7
MSTRG_10003_1	Gj8A251T70_mRNA1	0.909637	4.07044e-05	0.0101856	Gj8A251T70
MSTRG_10003_1	Gj8A296T60_mRNA1	0.918513	2.46481e-05	0.00800619	MSTRG_5147
MSTRG_10003_1	Gj8A379T52_mRNA1	0.904952	5.19868e-05	0.0113803	Gj8A379T52
MSTRG_10003_1	Gj8A88T89_mRNA1	0.932633	9.75162e-06	0.00505436	Gj8A88T89
MSTRG_10003_1	Gj8P355T20_mRNA1	0.973352	1.01207e-07	0.000327306	Gj8P355T20
MSTRG_10003_1	Gj8P76T7_mRNA1	0.923843	1.77358e-05	0.00681339	MSTRG_5023
MSTRG_10003_1	Gj8X251T57_mRNA1	0.942436	4.51721e-06	0.00341263	Gj8X251T57
MSTRG_10003_1	Gj9A177T98_mRNA1	0.932514	9.83607e-06	0.00507696	MSTRG_6672
MSTRG_10003_1	Gj9A269T86_mRNA1	0.910154	3.95895e-05	0.0100558	MSTRG_7253
MSTRG_10003_1	Gj9A328T75_mRNA1	0.926057	1.53625e-05	0.00633431	Gj9A328T75
MSTRG_10003_1	Gj9A752T104_mRNA1	0.947611	2.84536e-06	0.00266479	Gj9A752T104
MSTRG_10003_1	Gj9A767T55_mRNA1	0.967232	2.81619e-07	0.00064855	Gj9A767T55
MSTRG_10003_1	Gj9A796T106_mRNA1	0.941736	4.79311e-06	0.00351907	Gj9A796T106
MSTRG_10003_1	Gj9A861T125_mRNA1	0.958415	9.13299e-07	0.00135905	Gj9A861T125
MSTRG_10003_1	Gj9A972T154_mRNA1	0.981456	1.67427e-08	9.47904e-05	MSTRG_10003
MSTRG_10003_1	Gj9P1059T12_mRNA1	-0.9154	2.95698e-05	0.00874296	Gj9P1059T12
MSTRG_10003_1	Gj9P118T19_mRNA1	0.903251	5.66414e-05	0.0118327	Gj9P118T19
MSTRG_10003_1	Gj9P31T13_mRNA1	0.911771	3.62532e-05	0.00964277	MSTRG_5579
MSTRG_10003_1	Gj9P69T12_mRNA1	0.917647	2.59471e-05	0.00820351	MSTRG_5838
MSTRG_10003_1	Gj9X1038T49_mRNA1	0.905408	5.07926e-05	0.0112615	Gj9X1038T49
MSTRG_10003_1	Gj9X443T72_mRNA1	0.943708	4.04868e-06	0.00322615	Gj9X443T72
MSTRG_10003_1	Gju18682A0T88_mRNA1	0.933378	9.23603e-06	0.00491223	Gju18682A0T88
MSTRG_10003_1	MSTRG_3536_1	0.934054	8.78723e-06	0.00479137	MSTRG_3536
MSTRG_10003_1	MSTRG_5225_1	0.90492	5.20728e-05	0.0113888	MSTRG_5225
MSTRG_10003_1	MSTRG_69_2	0.90044	6.50438e-05	0.0126136	MSTRG_69
MSTRG_10003_1	MSTRG_76_1	0.987482	2.37098e-09	2.33002e-05	MSTRG_76
MSTRG_10003_1	MSTRG_7686_1	0.906163	4.88597e-05	0.0110679	MSTRG_7686
MSTRG_10003_1	MSTRG_8312_2	0.927931	1.3555e-05	0.00596949	MSTRG_8312
MSTRG_10003_1	MSTRG_8794_2	0.900439	6.50472e-05	0.0126139	MSTRG_8794
MSTRG_10003_1	MSTRG_9948_2	0.94926	2.43182e-06	0.00243778	MSTRG_9948
MSTRG_10009_1	Gj1P7T6_mRNA1	0.91914	2.37396e-05	0.0078649	Gj1P7T6
MSTRG_10009_1	Gj9X262T96_mRNA1	-0.928883	1.27035e-05	0.00578145	Gj9X262T96
MSTRG_10009_1	Gj9X828T31_mRNA1	0.945434	3.47508e-06	0.00297828	Gj9X828T31
MSTRG_10009_1	MSTRG_3807_2	0.91405	3.19315e-05	0.00907122	MSTRG_3807
MSTRG_10009_1	MSTRG_4573_1	0.939069	5.96811e-06	0.00393023	MSTRG_4573
MSTRG_10009_1	MSTRG_7502_2	0.901914	6.05238e-05	0.0122033	MSTRG_7502
MSTRG_10019_1	Gj10A240T28_mRNA1	0.90216	5.9796e-05	0.0121347	Gj10A240T28
MSTRG_10019_1	Gj10A243T55_mRNA1	0.928181	1.33276e-05	0.00592047	MSTRG_836
MSTRG_10019_1	Gj10A249T87_mRNA1	0.9191	2.3797e-05	0.00787395	MSTRG_862
MSTRG_10019_1	Gj10A284T89_mRNA1	0.937287	6.87244e-06	0.00423242	MSTRG_1025
MSTRG_10019_1	Gj10A285T110_mRNA1	0.923766	1.78239e-05	0.0068302	Gj10A285T110
MSTRG_10019_1	Gj10A289T101_mRNA1	0.901701	6.11607e-05	0.012263	Gj10A289T101
MSTRG_10019_1	Gj10A294T104_mRNA1	0.918323	2.49289e-05	0.0080488	MSTRG_1096
MSTRG_10019_1	Gj10A296T121_mRNA1	0.9242	1.73351e-05	0.00673586	MSTRG_1105
MSTRG_10019_1	Gj10A303T95_mRNA1	0.955789	1.23493e-06	0.00163508	Gj10A303T95
MSTRG_10019_1	Gj10P198T7_mRNA1	0.953075	1.65569e-06	0.00193964	Gj10P198T7
MSTRG_10019_1	Gj10P294T13_mRNA1	0.957867	9.74159e-07	0.00141395	Gj10P294T13
MSTRG_10019_1	Gj10X181T14_mRNA1	0.91439	3.13244e-05	0.00898677	MSTRG_765
MSTRG_10019_1	Gj11A107T7_mRNA1	0.903322	5.64418e-05	0.0118135	Gj11A107T7
MSTRG_10019_1	Gj11A184T15_mRNA1	0.971773	1.34587e-07	0.000394479	Gj11A184T15
MSTRG_10019_1	Gj11A222T54_mRNA1	0.954992	1.34844e-06	0.0017227	Gj11A222T54
MSTRG_10019_1	Gj11A263T75_mRNA1	0.923737	1.78571e-05	0.0068365	MSTRG_1342
MSTRG_10019_1	Gj11A286T32_mRNA1	0.945287	3.52118e-06	0.00299957	Gj11A286T32
MSTRG_10019_1	Gj11A303T68_mRNA1	0.946539	3.143e-06	0.00281696	MSTRG_1371
MSTRG_10019_1	Gj11A324T77_mRNA1	0.931363	1.06836e-05	0.00529372	Gj11A324T77
MSTRG_10019_1	Gj11A367T108_mRNA1	0.933603	9.08489e-06	0.00487153	Gj11A367T108
MSTRG_10019_1	Gj11A368T81_mRNA1	0.961445	6.28801e-07	0.00107605	MSTRG_1503
MSTRG_10019_1	Gj11A376T77_mRNA1	0.9041	5.4279e-05	0.0116006	Gj11A376T77
MSTRG_10019_1	Gj11A384T33_mRNA1	0.902088	6.00076e-05	0.0121546	MSTRG_1552
MSTRG_10019_1	Gj11A391T75_mRNA1	0.977201	4.6694e-08	0.000191519	MSTRG_1574
MSTRG_10019_1	Gj11A401T135_mRNA1	0.916417	2.78838e-05	0.00849921	Gj11A401T135
MSTRG_10019_1	Gj11A403T119_mRNA1	0.931022	1.0945e-05	0.00535712	MSTRG_1637
MSTRG_10019_1	Gj11A407T90_mRNA1	0.97647	5.46053e-08	0.000213856	MSTRG_1666
MSTRG_10019_1	Gj11A412T105_mRNA1	0.941862	4.74251e-06	0.0035	Gj11A412T105
MSTRG_10019_1	Gj11A413T117_mRNA1	0.933385	9.23141e-06	0.00491092	MSTRG_1706
MSTRG_10019_1	Gj11A414T94_mRNA1	0.916822	2.72343e-05	0.00840125	MSTRG_1711
MSTRG_10019_1	Gj11A415T156_mRNA1	0.938402	6.2947e-06	0.00403841	Gj11A415T156
MSTRG_10019_1	Gj11A424T110_mRNA1	0.934463	8.52383e-06	0.00472182	MSTRG_1775
MSTRG_10019_1	Gj11A428T71_mRNA1	0.953385	1.60266e-06	0.00190192	MSTRG_1799
MSTRG_10019_1	Gj11P324T10_mRNA1	0.925116	1.63384e-05	0.00653508	MSTRG_1396
MSTRG_10019_1	Gj11P367T19_mRNA1	0.910951	3.79167e-05	0.00985347	Gj11P367T19
MSTRG_10019_1	Gj11P420T12_mRNA1	0.980741	2.0201e-08	0.00010837	MSTRG_1749
MSTRG_10019_1	Gj11P90T4_mRNA1	0.929611	1.20815e-05	0.00563602	MSTRG_1224
MSTRG_10019_1	Gj11X221T4_mRNA1	0.907585	4.53796e-05	0.0107039	Gj11X221T4
MSTRG_10019_1	Gj11X231T17_mRNA1	0.914195	3.16724e-05	0.00903512	MSTRG_1308
MSTRG_10019_1	Gj11X391T59_mRNA1	0.906825	4.72162e-05	0.0108976	Gj11X391T59
MSTRG_10019_1	Gj11X421T40_mRNA1	0.935036	8.1658e-06	0.00462366	Gj11X421T40
MSTRG_10019_1	Gj11X429T37_mRNA1	0.948464	2.62493e-06	0.00254648	MSTRG_1806
MSTRG_10019_1	Gj1A139T14_mRNA1	0.925493	1.5941e-05	0.00645395	MSTRG_320
MSTRG_10019_1	Gj1A17T44_mRNA1	0.914194	3.16739e-05	0.00903533	MSTRG_98
MSTRG_10019_1	Gj1A22T66_mRNA1	0.927273	1.41693e-05	0.00609776	MSTRG_114
MSTRG_10019_1	Gj1A22T72_mRNA1	0.942932	4.32951e-06	0.00333749	MSTRG_119
MSTRG_10019_1	Gj1A299T15_mRNA1	0.970835	1.58255e-07	0.000442606	MSTRG_381
MSTRG_10019_1	Gj1A405T60_mRNA1	0.98177	1.53794e-08	8.90789e-05	Gj1A405T60
MSTRG_10019_1	Gj1A405T61_mRNA1	0.922124	1.97725e-05	0.00719319	MSTRG_422
MSTRG_10019_1	Gj1A42T52_mRNA1	0.915526	2.93582e-05	0.00871317	Gj1A42T52
MSTRG_10019_1	Gj1A486T57_mRNA1	0.938324	6.3338e-06	0.00405204	Gj1A486T57
MSTRG_10019_1	Gj1A486T58_mRNA1	0.925605	1.58248e-05	0.00643011	MSTRG_497
MSTRG_10019_1	Gj1A504T55_mRNA1	0.922889	1.88446e-05	0.00702154	MSTRG_542
MSTRG_10019_1	Gj1A529T123_mRNA1	0.912121	3.55623e-05	0.00955239	Gj1A529T123
MSTRG_10019_1	Gj1A540T36_mRNA1	0.94688	3.0458e-06	0.00276872	Gj1A540T36
MSTRG_10019_1	Gj1A90T48_mRNA1	0.915666	2.91226e-05	0.00867972	MSTRG_272
MSTRG_10019_1	Gj1A90T49_mRNA1	0.959442	8.07372e-07	0.00126024	MSTRG_273
MSTRG_10019_1	Gj1E405T1_mRNA1	0.901749	6.10196e-05	0.0122499	Gj1E405T1
MSTRG_10019_1	Gj1P17T5_mRNA1	0.90691	4.70079e-05	0.010876	MSTRG_96
MSTRG_10019_1	Gj1P24T6_mRNA1	0.925611	1.58183e-05	0.00642877	MSTRG_132
MSTRG_10019_1	Gj1P467T5_mRNA1	0.957513	1.01516e-06	0.00144967	MSTRG_477
MSTRG_10019_1	Gj1P504T9_mRNA1	0.934795	8.31527e-06	0.00466517	MSTRG_543
MSTRG_10019_1	Gj1P512T15_mRNA1	0.926837	1.45884e-05	0.00618196	MSTRG_591
MSTRG_10019_1	Gj1P514T12_mRNA1	0.937774	6.61518e-06	0.00414791	Gj1P514T12
MSTRG_10019_1	Gj1P528T12_mRNA1	0.906932	4.69526e-05	0.0108702	Gj1P528T12
MSTRG_10019_1	Gj1P530T8_mRNA1	0.95486	1.36799e-06	0.00173718	Gj1P530T8
MSTRG_10019_1	Gj1P57T3_mRNA1	0.931887	1.02907e-05	0.00519542	Gj1P57T3
MSTRG_10019_1	Gj1P8T16_mRNA1	0.971869	1.3235e-07	0.000390016	Gj1P8T16
MSTRG_10019_1	Gj1X23T33_mRNA1	0.939888	5.58522e-06	0.00380274	Gj1X23T33
MSTRG_10019_1	Gj1X511T45_mRNA1	0.942689	4.42087e-06	0.003374	Gj1X511T45
MSTRG_10019_1	Gj2A317T66_mRNA1	0.907255	4.61712e-05	0.0107879	Gj2A317T66
MSTRG_10019_1	Gj2A323T24_mRNA1	0.937444	6.78844e-06	0.00420506	MSTRG_2118
MSTRG_10019_1	Gj2A351T44_mRNA1	0.970588	1.65005e-07	0.000455607	Gj2A351T44
MSTRG_10019_1	Gj2A352T53_mRNA1	0.945286	3.52137e-06	0.00299966	MSTRG_2193
MSTRG_10019_1	Gj2A370T89_mRNA1	0.96456	4.14832e-07	0.000829855	Gj2A370T89
MSTRG_10019_1	Gj2A374T118_mRNA1	0.912797	3.42543e-05	0.00938207	MSTRG_2285
MSTRG_10019_1	Gj2A376T104_mRNA1	0.924591	1.69034e-05	0.00665033	MSTRG_2294
MSTRG_10019_1	Gj2A380T87_mRNA1	0.928249	1.32655e-05	0.00590693	MSTRG_2318
MSTRG_10019_1	Gj2A398T79_mRNA1	0.912304	3.5204e-05	0.00950531	MSTRG_2444
MSTRG_10019_1	Gj2A411T70_mRNA1	0.927982	1.3508e-05	0.00595942	MSTRG_2478
MSTRG_10019_1	Gj2A475T57_mRNA1	0.913889	3.22236e-05	0.00911158	Gj2A475T57
MSTRG_10019_1	Gj2A476T22_mRNA1	0.908859	4.24302e-05	0.0103816	MSTRG_2556
MSTRG_10019_1	Gj2A94T23_mRNA1	0.906797	4.72844e-05	0.0109047	MSTRG_1999
MSTRG_10019_1	Gj2P355T11_mRNA1	0.906591	4.77907e-05	0.0109578	MSTRG_2199
MSTRG_10019_1	Gj2P370T21_mRNA1	0.966074	3.34339e-07	0.000724498	MSTRG_2264
MSTRG_10019_1	Gj2P56T5_mRNA1	0.927305	1.41385e-05	0.00609147	Gj2P56T5
MSTRG_10019_1	Gj2P64T10_mRNA1	0.925318	1.61242e-05	0.00649123	MSTRG_1978
MSTRG_10019_1	Gj2P73T8_mRNA1	0.957163	1.05708e-06	0.00148615	Gj2P73T8
MSTRG_10019_1	Gj2P77T7_mRNA1	0.938828	6.0841e-06	0.00396722	Gj2P77T7
MSTRG_10019_1	Gj2X351T29_mRNA1	0.954265	1.45919e-06	0.00180262	Gj2X351T29
MSTRG_10019_1	Gj2X371T34_mRNA1	0.923286	1.8377e-05	0.00693393	Gj2X371T34
MSTRG_10019_1	Gj2X452T21_mRNA1	0.975845	6.21875e-08	0.000234807	MSTRG_2535
MSTRG_10019_1	Gj2X77T32_mRNA1	0.946808	3.06596e-06	0.00277884	Gj2X77T32
MSTRG_10019_1	Gj3A187T31_mRNA1	0.964095	4.42471e-07	0.000863803	Gj3A187T31
MSTRG_10019_1	Gj3A273T7_mRNA1	0.935153	8.0941e-06	0.00460348	Gj3A273T7
MSTRG_10019_1	Gj3A288T82_mRNA1	0.965536	3.61402e-07	0.000761423	MSTRG_2809
MSTRG_10019_1	Gj3A288T83_mRNA1	0.953097	1.65194e-06	0.00193701	MSTRG_2814
MSTRG_10019_1	Gj3A295T120_mRNA1	0.90369	5.54095e-05	0.011713	Gj3A295T120
MSTRG_10019_1	Gj3A341T79_mRNA1	0.931804	1.03524e-05	0.00521111	Gj3A341T79
MSTRG_10019_1	Gj3A83T32_mRNA1	0.941766	4.78075e-06	0.00351443	Gj3A83T32
MSTRG_10019_1	Gj3A84T30_mRNA1	0.938329	6.33136e-06	0.00405119	Gj3A84T30
MSTRG_10019_1	Gj3E274T1_mRNA1	0.901659	6.12873e-05	0.0122748	Gj3E274T1
MSTRG_10019_1	Gj3P274T3_mRNA1	0.900659	6.43561e-05	0.0125529	MSTRG_2784
MSTRG_10019_1	Gj3P307T7_mRNA1	0.913337	3.32371e-05	0.00924873	MSTRG_2885
MSTRG_10019_1	Gj3P320T22_mRNA1	0.916996	2.69583e-05	0.00835891	Gj3P320T22
MSTRG_10019_1	Gj3P345T12_mRNA1	0.956891	1.09049e-06	0.00151463	Gj3P345T12
MSTRG_10019_1	Gj3P34T8_mRNA1	0.976956	4.92338e-08	0.000198673	MSTRG_2638
MSTRG_10019_1	Gj3X153T7_mRNA1	0.970384	1.70726e-07	0.000466482	Gj3X153T7
MSTRG_10019_1	Gj3X249T3_mRNA1	0.940824	5.17196e-06	0.00365581	Gj3X249T3
MSTRG_10019_1	Gj3X293T78_mRNA1	0.978826	3.23473e-08	0.000147924	Gj3X293T78
MSTRG_10019_1	Gj3X294T28_mRNA1	0.961375	6.34483e-07	0.00108223	Gj3X294T28
MSTRG_10019_1	Gj3X312T30_mRNA1	0.958512	9.0281e-07	0.00134962	Gj3X312T30
MSTRG_10019_1	Gj3X322T67_mRNA1	0.902927	5.75631e-05	0.0119215	MSTRG_2985
MSTRG_10019_1	Gj4A123T65_mRNA1	0.912807	3.42363e-05	0.00937974	MSTRG_3379
MSTRG_10019_1	Gj4A129T65_mRNA1	0.959521	7.99591e-07	0.0012526	Gj4A129T65
MSTRG_10019_1	Gj4A173T56_mRNA1	0.913355	3.32046e-05	0.0092444	Gj4A173T56
MSTRG_10019_1	Gj4A176T20_mRNA1	0.949504	2.37486e-06	0.0024046	Gj4A176T20
MSTRG_10019_1	Gj4A19T47_mRNA1	0.941135	5.04022e-06	0.00360943	Gj4A19T47
MSTRG_10019_1	Gj4A1T75_mRNA1	0.929019	1.25853e-05	0.00575436	Gj4A1T75
MSTRG_10019_1	Gj4A26T42_mRNA1	0.952776	1.70827e-06	0.00197675	MSTRG_3229
MSTRG_10019_1	Gj4A339T67_mRNA1	0.929584	1.21046e-05	0.00564155	Gj4A339T67
MSTRG_10019_1	Gj4A36T55_mRNA1	0.955012	1.34555e-06	0.00172054	MSTRG_3261
MSTRG_10019_1	Gj4A37T57_mRNA1	0.916759	2.73344e-05	0.0084165	MSTRG_3260
MSTRG_10019_1	Gj4A38T38_mRNA1	0.914919	3.03954e-05	0.00885709	MSTRG_3262
MSTRG_10019_1	Gj4A39T37_mRNA1	0.921789	2.01889e-05	0.00726872	Gj4A39T37
MSTRG_10019_1	Gj4A424T52_mRNA1	0.966846	2.9838e-07	0.000673256	Gj4A424T52
MSTRG_10019_1	Gj4A424T54_mRNA1	0.949496	2.37677e-06	0.00240572	Gj4A424T54
MSTRG_10019_1	Gj4A446T29_mRNA1	0.961915	5.91912e-07	0.00103495	Gj4A446T29
MSTRG_10019_1	Gj4A480T73_mRNA1	0.971986	1.29636e-07	0.000384538	Gj4A480T73
MSTRG_10019_1	Gj4A483T65_mRNA1	0.906701	4.75196e-05	0.0109294	MSTRG_3657
MSTRG_10019_1	Gj4A484T47_mRNA1	0.941457	4.90642e-06	0.00356106	Gj4A484T47
MSTRG_10019_1	Gj4A66T74_mRNA1	0.944761	3.6904e-06	0.00307557	MSTRG_3317
MSTRG_10019_1	Gj4A7T41_mRNA1	0.938674	6.15945e-06	0.00399163	Gj4A7T41
MSTRG_10019_1	Gj4A89T45_mRNA1	0.911991	3.58179e-05	0.00958599	Gj4A89T45
MSTRG_10019_1	Gj4P18T15_mRNA1	0.925225	1.62228e-05	0.0065111	Gj4P18T15
MSTRG_10019_1	Gj4P49T11_mRNA1	0.910693	3.84515e-05	0.00991916	Gj4P49T11
MSTRG_10019_1	Gj4P503T16_mRNA1	0.949156	2.45641e-06	0.0024519	MSTRG_3721
MSTRG_10019_1	Gj4P53T12_mRNA1	0.915196	2.99192e-05	0.00879166	MSTRG_3290
MSTRG_10019_1	Gj4P55T3_mRNA1	0.911286	3.72303e-05	0.00976772	Gj4P55T3
MSTRG_10019_1	Gj4P55T4_mRNA1	0.937674	6.66721e-06	0.00416522	Gj4P55T4
MSTRG_10019_1	Gj4P56T4_mRNA1	0.967592	2.66609e-07	0.000626491	Gj4P56T4
MSTRG_10019_1	Gj4X2T43_mRNA1	0.917301	2.64806e-05	0.00828458	MSTRG_3141
MSTRG_10019_1	Gj4X408T11_mRNA1	0.940784	5.189e-06	0.00366193	Gj4X408T11
MSTRG_10019_1	Gj4X502T44_mRNA1	0.97562	6.51111e-08	0.000242489	Gj4X502T44
MSTRG_10019_1	Gj4X58T7_mRNA1	0.940681	5.2336e-06	0.00367788	Gj4X58T7
MSTRG_10019_1	Gj5A20T36_mRNA1	0.914363	3.13715e-05	0.00899332	Gj5A20T36
MSTRG_10019_1	Gj5A272T42_mRNA1	0.906875	4.70925e-05	0.0108848	MSTRG_3939
MSTRG_10019_1	Gj5P118T3_mRNA1	0.93001	1.17513e-05	0.00555589	Gj5P118T3
MSTRG_10019_1	Gj5X309T51_mRNA1	0.959493	8.02363e-07	0.00125533	Gj5X309T51
MSTRG_10019_1	Gj6A242T55_mRNA1	0.900471	6.49466e-05	0.012605	MSTRG_4282
MSTRG_10019_1	Gj6A293T41_mRNA1	0.956441	1.14771e-06	0.00156372	Gj6A293T41
MSTRG_10019_1	Gj6A297T89_mRNA1	0.903833	5.50137e-05	0.0116739	Gj6A297T89
MSTRG_10019_1	Gj6A331T76_mRNA1	0.916273	2.8118e-05	0.00853396	Gj6A331T76
MSTRG_10019_1	Gj6P313T3_mRNA1	0.973888	9.15121e-08	0.000305548	MSTRG_4361
MSTRG_10019_1	Gj6P321T17_mRNA1	0.910032	3.98502e-05	0.0100865	MSTRG_4388
MSTRG_10019_1	Gj6P330T14_mRNA1	0.925989	1.54315e-05	0.00634806	Gj6P330T14
MSTRG_10019_1	Gj6P40T5_mRNA1	0.93869	6.15204e-06	0.00398909	Gj6P40T5
MSTRG_10019_1	Gj6X303T8_mRNA1	0.927382	1.40661e-05	0.00607662	Gj6X303T8
MSTRG_10019_1	Gj6X316T76_mRNA1	0.978161	3.77163e-08	0.000164622	Gj6X316T76
MSTRG_10019_1	Gj6X335T68_mRNA1	0.914648	3.08688e-05	0.00892283	Gj6X335T68
MSTRG_10019_1	Gj7A111T18_mRNA1	0.906207	4.87498e-05	0.0110567	MSTRG_4559
MSTRG_10019_1	Gj7A345T10_mRNA1	0.902495	5.88117e-05	0.012041	MSTRG_4692
MSTRG_10019_1	Gj7A361T88_mRNA1	0.924574	1.69221e-05	0.00665407	Gj7A361T88
MSTRG_10019_1	Gj7A397T69_mRNA1	0.907154	4.64139e-05	0.0108136	MSTRG_4827
MSTRG_10019_1	Gj7A405T100_mRNA1	0.944382	3.8164e-06	0.00313006	MSTRG_4857
MSTRG_10019_1	Gj7P261T6_mRNA1	0.918506	2.46584e-05	0.00800777	MSTRG_4621
MSTRG_10019_1	Gj7P302T1_mRNA1	0.953791	1.53514e-06	0.00185469	Gj7P302T1
MSTRG_10019_1	Gj7P303T6_mRNA1	0.907638	4.52542e-05	0.0106905	Gj7P303T6
MSTRG_10019_1	Gj7P339T13_mRNA1	0.930556	1.13107e-05	0.00544668	Gj7P339T13
MSTRG_10019_1	Gj7P357T3_mRNA1	0.939836	5.6089e-06	0.00381087	Gj7P357T3
MSTRG_10019_1	Gj7P372T7_mRNA1	0.908676	4.28446e-05	0.010428	Gj7P372T7
MSTRG_10019_1	Gj7P394T11_mRNA1	0.917005	2.6944e-05	0.00835671	MSTRG_4817
MSTRG_10019_1	Gj7X272T10_mRNA1	0.955839	1.228e-06	0.00162954	Gj7X272T10
MSTRG_10019_1	Gj7X272T23_mRNA1	0.961786	6.01834e-07	0.00104618	Gj7X272T23
MSTRG_10019_1	Gj7X291T41_mRNA1	0.959622	7.89771e-07	0.00124289	Gj7X291T41
MSTRG_10019_1	Gj7X302T13_mRNA1	0.934512	8.49299e-06	0.00471353	MSTRG_4644
MSTRG_10019_1	Gj7X361T66_mRNA1	0.92147	2.05928e-05	0.00734073	Gj7X361T66
MSTRG_10019_1	Gj8A12T62_mRNA1	0.935768	7.72565e-06	0.00449686	MSTRG_4920
MSTRG_10019_1	Gj8A185T54_mRNA1	0.960683	6.92603e-07	0.00114316	MSTRG_5090
MSTRG_10019_1	Gj8A322T58_mRNA1	0.951539	1.93994e-06	0.00213271	Gj8A322T58
MSTRG_10019_1	Gj8A390T97_mRNA1	0.901257	6.25074e-05	0.0123872	MSTRG_5308
MSTRG_10019_1	Gj8A395T120_mRNA1	0.900692	6.42529e-05	0.0125438	MSTRG_5333
MSTRG_10019_1	Gj8A4T60_mRNA1	0.969691	1.91446e-07	0.000504372	MSTRG_4904
MSTRG_10019_1	Gj8A60T51_mRNA1	0.913775	3.24319e-05	0.00914013	MSTRG_4986
MSTRG_10019_1	Gj8A90T73_mRNA1	0.923942	1.76244e-05	0.006792	Gj8A90T73
MSTRG_10019_1	Gj8E386T7_mRNA1	0.904371	5.35426e-05	0.0115308	Gj8E386T7
MSTRG_10019_1	Gj8E94T1_mRNA2	0.93348	9.16742e-06	0.00489377	Gj8E94T1
MSTRG_10019_1	Gj8P322T5_mRNA1	0.92941	1.22508e-05	0.00567628	Gj8P322T5
MSTRG_10019_1	Gj8P323T1_mRNA1	0.939646	5.69638e-06	0.00384063	Gj8P323T1
MSTRG_10019_1	Gj8P373T8_mRNA1	0.900539	6.47333e-05	0.0125861	Gj8P373T8
MSTRG_10019_1	Gj8P377T13_mRNA1	0.928836	1.2745e-05	0.0057909	Gj8P377T13
MSTRG_10019_1	Gj8P395T7_mRNA1	0.951155	2.01689e-06	0.00218273	MSTRG_5332
MSTRG_10019_1	Gj8P92T6_mRNA1	0.954293	1.45469e-06	0.00179947	MSTRG_5040
MSTRG_10019_1	Gj8X373T35_mRNA1	0.927855	1.36246e-05	0.00598431	MSTRG_5244
MSTRG_10019_1	Gj8X376T58_mRNA1	0.904456	5.33129e-05	0.0115089	Gj8X376T58
MSTRG_10019_1	Gj9A101T100_mRNA1	0.915431	2.95184e-05	0.00873573	Gj9A101T100
MSTRG_10019_1	Gj9A1025T87_mRNA1	0.971115	1.50863e-07	0.000427977	MSTRG_10281
MSTRG_10019_1	Gj9A102T72_mRNA1	0.919121	2.37669e-05	0.00786921	Gj9A102T72
MSTRG_10019_1	Gj9A1031T85_mRNA1	0.915256	2.98152e-05	0.00877723	Gj9A1031T85
MSTRG_10019_1	Gj9A1036T86_mRNA1	0.91765	2.59425e-05	0.0082028	Gj9A1036T86
MSTRG_10019_1	Gj9A1049T101_mRNA1	0.936421	7.34907e-06	0.00438259	MSTRG_10456
MSTRG_10019_1	Gj9A1095T89_mRNA1	0.96826	2.40549e-07	0.000586786	MSTRG_10783
MSTRG_10019_1	Gj9A1099T69_mRNA1	0.948405	2.63971e-06	0.00255452	Gj9A1099T69
MSTRG_10019_1	Gj9A1099T72_mRNA1	0.901025	6.32212e-05	0.0124518	MSTRG_10813
MSTRG_10019_1	Gj9A118T74_mRNA1	0.952402	1.77586e-06	0.00202348	MSTRG_6194
MSTRG_10019_1	Gj9A119T110_mRNA1	0.941772	4.7783e-06	0.00351351	MSTRG_6202
MSTRG_10019_1	Gj9A126T131_mRNA1	0.937779	6.61243e-06	0.00414699	Gj9A126T131
MSTRG_10019_1	Gj9A127T110_mRNA1	0.91384	3.23119e-05	0.00912371	MSTRG_6269
MSTRG_10019_1	Gj9A144T91_mRNA1	0.915927	2.86867e-05	0.00861711	MSTRG_6419
MSTRG_10019_1	Gj9A145T74_mRNA1	0.906066	4.91057e-05	0.0110928	MSTRG_6432
MSTRG_10019_1	Gj9A159T117_mRNA1	0.933727	9.00199e-06	0.004849	MSTRG_6535
MSTRG_10019_1	Gj9A165T100_mRNA1	0.965614	3.57373e-07	0.000756056	Gj9A165T100
MSTRG_10019_1	Gj9A203T97_mRNA1	0.984006	8.02446e-09	5.61786e-05	MSTRG_6885
MSTRG_10019_1	Gj9A205T94_mRNA1	0.908478	4.32968e-05	0.0104782	MSTRG_6898
MSTRG_10019_1	Gj9A213T85_mRNA1	0.941721	4.79914e-06	0.00352133	MSTRG_6941
MSTRG_10019_1	Gj9A213T86_mRNA1	0.939283	5.86615e-06	0.00389711	Gj9A213T86
MSTRG_10019_1	Gj9A213T91_mRNA1	0.919251	2.35816e-05	0.00783983	Gj9A213T91
MSTRG_10019_1	Gj9A221T97_mRNA1	0.964796	4.01386e-07	0.000812932	MSTRG_7016
MSTRG_10019_1	Gj9A225T92_mRNA1	0.926122	1.52961e-05	0.00632135	Gj9A225T92
MSTRG_10019_1	Gj9A22T117_mRNA1	0.921346	2.07516e-05	0.00736867	MSTRG_5523
MSTRG_10019_1	Gj9A24T69_mRNA1	0.966611	3.09013e-07	0.000688716	MSTRG_5536
MSTRG_10019_1	Gj9A283T117_mRNA1	0.929972	1.17823e-05	0.00556351	MSTRG_7337
MSTRG_10019_1	Gj9A315T24_mRNA1	0.95782	9.79524e-07	0.00141868	Gj9A315T24
MSTRG_10019_1	Gj9A31T93_mRNA1	0.937078	6.98493e-06	0.00426857	MSTRG_5581
MSTRG_10019_1	Gj9A33T157_mRNA1	0.909673	4.06263e-05	0.0101767	MSTRG_5597
MSTRG_10019_1	Gj9A340T28_mRNA1	0.951533	1.94116e-06	0.00213351	Gj9A340T28
MSTRG_10019_1	Gj9A34T71_mRNA1	0.919018	2.39138e-05	0.00789232	MSTRG_5609
MSTRG_10019_1	Gj9A35T95_mRNA1	0.939969	5.54867e-06	0.00379012	MSTRG_5608
MSTRG_10019_1	Gj9A42T75_mRNA1	0.914476	3.11717e-05	0.00896545	MSTRG_5666
MSTRG_10019_1	Gj9A466T16_mRNA1	0.903464	5.60425e-05	0.0117748	MSTRG_7545
MSTRG_10019_1	Gj9A46T93_mRNA1	0.936444	7.33636e-06	0.00437864	MSTRG_5688
MSTRG_10019_1	Gj9A516T68_mRNA1	0.924113	1.74323e-05	0.00675483	Gj9A516T68
MSTRG_10019_1	Gj9A543T42_mRNA1	0.948916	2.51384e-06	0.00248468	Gj9A543T42
MSTRG_10019_1	Gj9A563T43_mRNA1	0.922567	1.92301e-05	0.00709308	MSTRG_7731
MSTRG_10019_1	Gj9A575T74_mRNA1	0.940705	5.22303e-06	0.00367412	Gj9A575T74
MSTRG_10019_1	Gj9A575T75_mRNA1	0.903327	5.64268e-05	0.011812	MSTRG_7796
MSTRG_10019_1	Gj9A57T105_mRNA1	0.919843	2.27527e-05	0.00770544	Gj9A57T105
MSTRG_10019_1	Gj9A601T81_mRNA1	0.964273	4.31739e-07	0.000850554	Gj9A601T81
MSTRG_10019_1	Gj9A603T89_mRNA1	0.974946	7.45395e-08	0.000265894	MSTRG_7885
MSTRG_10019_1	Gj9A612T70_mRNA1	0.909759	4.04405e-05	0.0101553	Gj9A612T70
MSTRG_10019_1	Gj9A616T68_mRNA1	0.911384	3.70307e-05	0.00974247	MSTRG_7942
MSTRG_10019_1	Gj9A618T94_mRNA1	0.951737	1.90142e-06	0.00210716	MSTRG_7945
MSTRG_10019_1	Gj9A620T84_mRNA1	0.954249	1.4617e-06	0.00180437	Gj9A620T84
MSTRG_10019_1	Gj9A630T70_mRNA1	0.955908	1.21863e-06	0.00162204	MSTRG_7985
MSTRG_10019_1	Gj9A63T83_mRNA1	0.902027	6.01873e-05	0.0121715	Gj9A63T83
MSTRG_10019_1	Gj9A643T94_mRNA1	0.920499	2.1861e-05	0.0075579	Gj9A643T94
MSTRG_10019_1	Gj9A651T86_mRNA1	0.954251	1.46138e-06	0.00180415	Gj9A651T86
MSTRG_10019_1	Gj9A664T117_mRNA1	0.909652	4.06729e-05	0.010182	MSTRG_8166
MSTRG_10019_1	Gj9A678T94_mRNA1	0.955838	1.22815e-06	0.00162966	MSTRG_8263
MSTRG_10019_1	Gj9A684T91_mRNA1	0.900444	6.50327e-05	0.0126126	Gj9A684T91
MSTRG_10019_1	Gj9A688T94_mRNA1	0.920991	2.1212e-05	0.00744842	Gj9A688T94
MSTRG_10019_1	Gj9A697T94_mRNA1	0.900849	6.37652e-05	0.0125005	MSTRG_8424
MSTRG_10019_1	Gj9A698T65_mRNA1	0.946971	3.02036e-06	0.00275587	MSTRG_8433
MSTRG_10019_1	Gj9A707T85_mRNA1	0.934648	8.40694e-06	0.00469024	Gj9A707T85
MSTRG_10019_1	Gj9A70T135_mRNA1	0.906266	4.86011e-05	0.0110415	Gj9A70T135
MSTRG_10019_1	Gj9A723T92_mRNA1	0.911359	3.70824e-05	0.00974902	Gj9A723T92
MSTRG_10019_1	Gj9A728T71_mRNA1	0.952199	1.81343e-06	0.00204885	MSTRG_8643
MSTRG_10019_1	Gj9A739T136_mRNA1	-0.92842	1.31121e-05	0.00587322	MSTRG_8678
MSTRG_10019_1	Gj9A741T93_mRNA1	0.966319	3.22565e-07	0.000707943	MSTRG_8688
MSTRG_10019_1	Gj9A758T77_mRNA1	0.918659	2.44336e-05	0.0079733	MSTRG_8745
MSTRG_10019_1	Gj9A761T78_mRNA1	0.905638	5.01983e-05	0.011202	MSTRG_8754
MSTRG_10019_1	Gj9A789T79_mRNA1	0.951691	1.91033e-06	0.00211311	MSTRG_8897
MSTRG_10019_1	Gj9A820T113_mRNA1	0.905491	5.05777e-05	0.0112397	Gj9A820T113
MSTRG_10019_1	Gj9A829T57_mRNA1	0.946477	3.16092e-06	0.002826	Gj9A829T57
MSTRG_10019_1	Gj9A85T104_mRNA1	0.926175	1.52431e-05	0.00631096	MSTRG_5969
MSTRG_10019_1	Gj9A863T118_mRNA1	0.922105	1.97953e-05	0.00719736	MSTRG_9346
MSTRG_10019_1	Gj9A881T88_mRNA1	0.919758	2.28704e-05	0.00772482	MSTRG_9473
MSTRG_10019_1	Gj9A902T123_mRNA1	0.926927	1.45006e-05	0.00616453	Gj9A902T123
MSTRG_10019_1	Gj9A908T56_mRNA1	0.95076	2.09829e-06	0.00223528	MSTRG_9674
MSTRG_10019_1	Gj9A943T84_mRNA1	0.906909	4.70109e-05	0.0108763	MSTRG_9831
MSTRG_10019_1	Gj9A946T67_mRNA1	0.941991	4.69105e-06	0.0034804	Gj9A946T67
MSTRG_10019_1	Gj9A960T100_mRNA1	0.949474	2.38164e-06	0.00240859	MSTRG_9921
MSTRG_10019_1	Gj9A974T88_mRNA1	0.914639	3.0884e-05	0.00892497	MSTRG_10007
MSTRG_10019_1	Gj9A974T89_mRNA1	0.927703	1.3765e-05	0.006014	Gj9A974T89
MSTRG_10019_1	Gj9A976T74_mRNA1	0.948633	2.58304e-06	0.00252344	Gj9A976T74
MSTRG_10019_1	Gj9A997T71_mRNA1	0.931455	1.06134e-05	0.00527642	MSTRG_10149
MSTRG_10019_1	Gj9P100T16_mRNA1	0.946879	3.04619e-06	0.00276892	MSTRG_6070
MSTRG_10019_1	Gj9P100T9_mRNA1	0.923678	1.79239e-05	0.00684916	MSTRG_6073
MSTRG_10019_1	Gj9P1021T14_mRNA1	0.939592	5.72112e-06	0.00384897	MSTRG_10259
MSTRG_10019_1	Gj9P1022T12_mRNA1	0.95455	1.41495e-06	0.00177132	MSTRG_10265
MSTRG_10019_1	Gj9P1027T12_mRNA1	0.96748	2.71233e-07	0.000633233	MSTRG_10289
MSTRG_10019_1	Gj9P1032T17_mRNA1	0.970164	1.77098e-07	0.000478336	MSTRG_10338
MSTRG_10019_1	Gj9P1032T18_mRNA1	0.915501	2.9399e-05	0.00871892	Gj9P1032T18
MSTRG_10019_1	Gj9P1037T7_mRNA1	0.919628	2.30514e-05	0.00775443	MSTRG_10370
MSTRG_10019_1	Gj9P1061T21_mRNA1	0.941459	4.9055e-06	0.00356072	Gj9P1061T21
MSTRG_10019_1	Gj9P1079T14_mRNA1	0.970793	1.59379e-07	0.000444794	Gj9P1079T14
MSTRG_10019_1	Gj9P128T22_mRNA1	0.914324	3.14406e-05	0.00900293	Gj9P128T22
MSTRG_10019_1	Gj9P132T7_mRNA1	0.916038	2.85038e-05	0.00859056	Gj9P132T7
MSTRG_10019_1	Gj9P161T20_mRNA1	0.908472	4.33113e-05	0.0104798	Gj9P161T20
MSTRG_10019_1	Gj9P198T10_mRNA1	0.901662	6.12781e-05	0.012274	Gj9P198T10
MSTRG_10019_1	Gj9P240T20_mRNA1	0.930974	1.09821e-05	0.005366	MSTRG_7132
MSTRG_10019_1	Gj9P244T16_mRNA1	0.972361	1.21279e-07	0.000368276	MSTRG_7152
MSTRG_10019_1	Gj9P255T12_mRNA1	0.986321	3.68608e-09	3.24156e-05	MSTRG_7191
MSTRG_10019_1	Gj9P279T13_mRNA1	0.945972	3.31006e-06	0.0028999	Gj9P279T13
MSTRG_10019_1	Gj9P38T12_mRNA1	0.900739	6.4107e-05	0.0125309	MSTRG_5630
MSTRG_10019_1	Gj9P481T3_mRNA1	0.929123	1.24958e-05	0.00573367	MSTRG_7549
MSTRG_10019_1	Gj9P540T22_mRNA1	0.916131	2.83499e-05	0.00856807	MSTRG_7620
MSTRG_10019_1	Gj9P542T8_mRNA1	0.961522	6.22699e-07	0.00106937	MSTRG_7630
MSTRG_10019_1	Gj9P543T3_mRNA1	0.969288	2.04365e-07	0.000526794	Gj9P543T3
MSTRG_10019_1	Gj9P543T4_mRNA1	0.942007	4.6847e-06	0.00347797	Gj9P543T4
MSTRG_10019_1	Gj9P551T11_mRNA1	0.909638	4.07019e-05	0.0101854	Gj9P551T11
MSTRG_10019_1	Gj9P5T11_mRNA1	0.961768	6.03236e-07	0.00104775	Gj9P5T11
MSTRG_10019_1	Gj9P625T21_mRNA1	0.934926	8.23346e-06	0.00464254	MSTRG_7964
MSTRG_10019_1	Gj9P642T15_mRNA1	0.923809	1.77746e-05	0.00682079	MSTRG_8029
MSTRG_10019_1	Gj9P667T27_mRNA1	0.974515	8.11273e-08	0.000281197	Gj9P667T27
MSTRG_10019_1	Gj9P708T9_mRNA1	0.907339	4.59692e-05	0.0107665	MSTRG_8521
MSTRG_10019_1	Gj9P720T14_mRNA1	0.957413	1.027e-06	0.00146004	MSTRG_8621
MSTRG_10019_1	Gj9P722T8_mRNA1	0.908637	4.29341e-05	0.010438	Gj9P722T8
MSTRG_10019_1	Gj9P739T9_mRNA1	0.923419	1.82225e-05	0.0069052	Gj9P739T9
MSTRG_10019_1	Gj9P784T9_mRNA1	0.923859	1.7718e-05	0.00680997	MSTRG_8867
MSTRG_10019_1	Gj9P789T13_mRNA1	0.941518	4.88139e-06	0.00355187	Gj9P789T13
MSTRG_10019_1	Gj9P810T11_mRNA1	0.906963	4.68784e-05	0.0108624	Gj9P810T11
MSTRG_10019_1	Gj9P811T12_mRNA1	0.959519	7.9977e-07	0.00125278	MSTRG_8979
MSTRG_10019_1	Gj9P859T14_mRNA1	0.96742	2.73699e-07	0.000636877	MSTRG_9310
MSTRG_10019_1	Gj9P872T14_mRNA1	0.910884	3.8054e-05	0.00987042	Gj9P872T14
MSTRG_10019_1	Gj9P875T17_mRNA1	0.925752	1.56735e-05	0.00639879	MSTRG_9439
MSTRG_10019_1	Gj9P89T24_mRNA1	0.944992	3.61513e-06	0.00304218	MSTRG_6005
MSTRG_10019_1	Gj9P902T17_mRNA1	0.910187	3.95193e-05	0.0100475	MSTRG_9625
MSTRG_10019_1	Gj9P90T10_mRNA1	0.988587	1.49595e-09	1.63237e-05	MSTRG_6007
MSTRG_10019_1	Gj9P960T12_mRNA1	0.939109	5.94859e-06	0.00392394	MSTRG_9917
MSTRG_10019_1	Gj9P970T7_mRNA1	0.948042	2.73223e-06	0.0026042	Gj9P970T7
MSTRG_10019_1	Gj9P980T20_mRNA1	0.900551	6.46959e-05	0.0125828	Gj9P980T20
MSTRG_10019_1	Gj9P982T15_mRNA1	0.908427	4.34145e-05	0.0104911	MSTRG_10065
MSTRG_10019_1	Gj9P983T15_mRNA1	0.922872	1.88641e-05	0.00702514	MSTRG_10067
MSTRG_10019_1	Gj9P987T9_mRNA1	0.909263	4.15277e-05	0.0102791	MSTRG_10095
MSTRG_10019_1	Gj9P988T11_mRNA1	0.964994	3.90338e-07	0.000798778	Gj9P988T11
MSTRG_10019_1	Gj9P990T12_mRNA1	0.905608	5.02752e-05	0.0112096	MSTRG_10108
MSTRG_10019_1	Gj9X1008T52_mRNA1	0.951727	1.90333e-06	0.00210844	MSTRG_10193
MSTRG_10019_1	Gj9X1029T101_mRNA1	0.944312	3.83972e-06	0.00313995	Gj9X1029T101
MSTRG_10019_1	Gj9X1047T21_mRNA1	0.97752	4.35433e-08	0.000182441	MSTRG_10433
MSTRG_10019_1	Gj9X1098T45_mRNA1	0.915567	2.92876e-05	0.00870317	MSTRG_10805
MSTRG_10019_1	Gj9X125T64_mRNA1	0.904629	5.28481e-05	0.0114642	MSTRG_6244
MSTRG_10019_1	Gj9X135T72_mRNA1	0.920862	2.1381e-05	0.00747726	Gj9X135T72
MSTRG_10019_1	Gj9X145T52_mRNA1	0.900043	6.63075e-05	0.0127292	MSTRG_6427
MSTRG_10019_1	Gj9X152T64_mRNA1	0.931868	1.03045e-05	0.00519896	Gj9X152T64
MSTRG_10019_1	Gj9X155T108_mRNA1	0.911924	3.59492e-05	0.00960319	Gj9X155T108
MSTRG_10019_1	Gj9X164T72_mRNA1	0.926062	1.53574e-05	0.00633332	Gj9X164T72
MSTRG_10019_1	Gj9X168T58_mRNA1	0.906697	4.75293e-05	0.0109305	Gj9X168T58
MSTRG_10019_1	Gj9X216T83_mRNA1	0.902172	5.97588e-05	0.0121312	Gj9X216T83
MSTRG_10019_1	Gj9X231T66_mRNA1	0.927346	1.41001e-05	0.0060836	Gj9X231T66
MSTRG_10019_1	Gj9X262T105_mRNA1	0.94441	3.80675e-06	0.00312595	Gj9X262T105
MSTRG_10019_1	Gj9X270T43_mRNA1	0.947441	2.89096e-06	0.00268898	Gj9X270T43
MSTRG_10019_1	Gj9X273T45_mRNA1	0.934651	8.40496e-06	0.00468971	MSTRG_7282
MSTRG_10019_1	Gj9X300T30_mRNA1	0.961885	5.94198e-07	0.00103755	Gj9X300T30
MSTRG_10019_1	Gj9X653T40_mRNA1	0.984207	7.53583e-09	5.36997e-05	MSTRG_8095
MSTRG_10019_1	Gj9X686T42_mRNA1	0.90927	4.15131e-05	0.0102774	Gj9X686T42
MSTRG_10019_1	Gj9X701T89_mRNA1	0.932002	1.02062e-05	0.0051738	Gj9X701T89
MSTRG_10019_1	Gj9X832T23_mRNA1	0.905582	5.0342e-05	0.0112162	MSTRG_9141
MSTRG_10019_1	Gj9X918T63_mRNA1	0.927928	1.35578e-05	0.00597007	Gj9X918T63
MSTRG_10019_1	Gj9X963T50_mRNA1	0.953309	1.61559e-06	0.0019112	Gj9X963T50
MSTRG_10019_1	Gj9X977T57_mRNA1	0.919192	2.36658e-05	0.00785321	MSTRG_10026
MSTRG_10019_1	Gj9X983T34_mRNA1	0.910752	3.8329e-05	0.0099042	MSTRG_10066
MSTRG_10019_1	Gju12567A0T42_mRNA1	0.974255	8.53044e-08	0.000290899	MSTRG_10865
MSTRG_10019_1	MSTRG_10014_1	0.911789	3.62179e-05	0.0096382	MSTRG_10014
MSTRG_10019_1	MSTRG_10081_1	0.957462	1.0211e-06	0.00145489	MSTRG_10081
MSTRG_10019_1	MSTRG_10110_1	0.951025	2.04334e-06	0.00219999	MSTRG_10110
MSTRG_10019_1	MSTRG_10273_1	0.93235	9.95393e-06	0.00510818	MSTRG_10273
MSTRG_10019_1	MSTRG_1028_1	0.907923	4.45819e-05	0.0106181	MSTRG_1028
MSTRG_10019_1	MSTRG_10327_1	0.952104	1.83134e-06	0.00206079	MSTRG_10327
MSTRG_10019_1	MSTRG_10339_2	0.972121	1.26565e-07	0.000378312	MSTRG_10339
MSTRG_10019_1	MSTRG_10352_1	0.927112	1.43226e-05	0.00612886	MSTRG_10352
MSTRG_10019_1	MSTRG_10677_1	0.930308	1.15093e-05	0.00549585	MSTRG_10677
MSTRG_10019_1	MSTRG_1154_1	0.940327	5.38816e-06	0.00373369	MSTRG_1154
MSTRG_10019_1	MSTRG_116_3	0.946413	3.17938e-06	0.00283531	MSTRG_116
MSTRG_10019_1	MSTRG_1297_1	0.942333	4.55695e-06	0.00342834	MSTRG_1297
MSTRG_10019_1	MSTRG_135_1	0.933874	8.9051e-06	0.00482239	MSTRG_135
MSTRG_10019_1	MSTRG_1382_2	0.952253	1.80343e-06	0.00204214	MSTRG_1382
MSTRG_10019_1	MSTRG_1606_3	0.919447	2.33049e-05	0.00779551	MSTRG_1606
MSTRG_10019_1	MSTRG_1638_1	0.927325	1.41203e-05	0.00608774	MSTRG_1638
MSTRG_10019_1	MSTRG_1695_1	0.947645	2.8365e-06	0.00266005	MSTRG_1695
MSTRG_10019_1	MSTRG_187_1	0.941108	5.05129e-06	0.00361338	MSTRG_187
MSTRG_10019_1	MSTRG_1874_1	0.962596	5.41496e-07	0.000977427	MSTRG_1874
MSTRG_10019_1	MSTRG_1877_1	0.917735	2.58129e-05	0.00818311	MSTRG_1877
MSTRG_10019_1	MSTRG_2124_2	0.912272	3.5267e-05	0.00951362	MSTRG_2124
MSTRG_10019_1	MSTRG_2136_2	0.951147	2.01838e-06	0.0021837	MSTRG_2136
MSTRG_10019_1	MSTRG_2198_1	0.90283	5.78432e-05	0.0119483	MSTRG_2198
MSTRG_10019_1	MSTRG_2239_1	0.943741	4.03682e-06	0.00322134	MSTRG_2239
MSTRG_10019_1	MSTRG_2416_2	0.931687	1.04391e-05	0.005233	MSTRG_2416
MSTRG_10019_1	MSTRG_2454_2	0.930908	1.10336e-05	0.00537827	MSTRG_2454
MSTRG_10019_1	MSTRG_2569_1	0.961596	6.1677e-07	0.00106284	MSTRG_2569
MSTRG_10019_1	MSTRG_2586_1	0.904809	5.23659e-05	0.0114175	MSTRG_2586
MSTRG_10019_1	MSTRG_260_5	0.902623	5.84403e-05	0.0120052	MSTRG_260
MSTRG_10019_1	MSTRG_2852_1	0.903441	5.61055e-05	0.011781	MSTRG_2852
MSTRG_10019_1	MSTRG_2911_1	0.902136	5.98663e-05	0.0121413	MSTRG_2911
MSTRG_10019_1	MSTRG_2932_1	0.938661	6.16621e-06	0.00399394	MSTRG_2932
MSTRG_10019_1	MSTRG_3059_1	0.919746	2.28872e-05	0.00772758	MSTRG_3059
MSTRG_10019_1	MSTRG_3480_1	0.919785	2.28335e-05	0.00771875	MSTRG_3480
MSTRG_10019_1	MSTRG_3677_1	0.948213	2.68832e-06	0.00258072	MSTRG_3677
MSTRG_10019_1	MSTRG_3793_1	0.950774	2.09535e-06	0.00223341	MSTRG_3793
MSTRG_10019_1	MSTRG_3802_1	0.919648	2.30228e-05	0.00774978	MSTRG_3802
MSTRG_10019_1	MSTRG_3900_1	0.911406	3.69866e-05	0.00973687	MSTRG_3900
MSTRG_10019_1	MSTRG_3969_1	0.943098	4.26839e-06	0.00331377	MSTRG_3969
MSTRG_10019_1	MSTRG_3975_1	0.94027	5.41359e-06	0.00374274	MSTRG_3975
MSTRG_10019_1	MSTRG_4059_2	0.934543	8.4733e-06	0.00470823	MSTRG_4059
MSTRG_10019_1	MSTRG_4135_1	0.954302	1.45328e-06	0.00179849	MSTRG_4135
MSTRG_10019_1	MSTRG_4235_1	0.901315	6.23309e-05	0.0123711	MSTRG_4235
MSTRG_10019_1	MSTRG_4310_1	0.930547	1.13177e-05	0.0054484	MSTRG_4310
MSTRG_10019_1	MSTRG_4429_2	0.951223	2.00298e-06	0.00217364	MSTRG_4429
MSTRG_10019_1	MSTRG_4474_1	0.944275	3.85236e-06	0.00314529	MSTRG_4474
MSTRG_10019_1	MSTRG_4569_2	0.937056	6.99714e-06	0.00427246	MSTRG_4569
MSTRG_10019_1	MSTRG_4796_1	0.902108	5.99476e-05	0.012149	MSTRG_4796
MSTRG_10019_1	MSTRG_4800_3	0.972444	1.19477e-07	0.000364803	MSTRG_4800
MSTRG_10019_1	MSTRG_4875_1	0.953216	1.63137e-06	0.00192245	MSTRG_4875
MSTRG_10019_1	MSTRG_5116_1	0.938325	6.33306e-06	0.00405178	MSTRG_5116
MSTRG_10019_1	MSTRG_5151_1	0.945437	3.47394e-06	0.00297775	MSTRG_5151
MSTRG_10019_1	MSTRG_5209_2	0.918747	2.43057e-05	0.00795354	MSTRG_5209
MSTRG_10019_1	MSTRG_5254_1	0.907043	4.66837e-05	0.010842	MSTRG_5254
MSTRG_10019_1	MSTRG_5296_1	0.907399	4.58252e-05	0.0107512	MSTRG_5296
MSTRG_10019_1	MSTRG_5330_1	0.936307	7.4137e-06	0.0044026	MSTRG_5330
MSTRG_10019_1	MSTRG_5444_1	0.933465	9.1775e-06	0.00489647	MSTRG_5444
MSTRG_10019_1	MSTRG_5707_1	0.916737	2.73702e-05	0.00842194	MSTRG_5707
MSTRG_10019_1	MSTRG_5733_1	0.934927	8.23312e-06	0.00464245	MSTRG_5733
MSTRG_10019_1	MSTRG_5735_4	0.930266	1.15429e-05	0.00550421	MSTRG_5735
MSTRG_10019_1	MSTRG_59_1	0.937431	6.79529e-06	0.0042073	MSTRG_59
MSTRG_10019_1	MSTRG_593_1	0.935191	8.07081e-06	0.00459688	MSTRG_593
MSTRG_10019_1	MSTRG_596_1	0.910789	3.82509e-05	0.00989463	MSTRG_596
MSTRG_10019_1	MSTRG_612_1	0.907115	4.65078e-05	0.0108235	MSTRG_612
MSTRG_10019_1	MSTRG_6325_1	0.93252	9.8321e-06	0.0050759	MSTRG_6325
MSTRG_10019_1	MSTRG_6498_1	0.92594	1.54804e-05	0.00635837	MSTRG_6498
MSTRG_10019_1	MSTRG_654_1	0.952965	1.67491e-06	0.00195314	MSTRG_654
MSTRG_10019_1	MSTRG_6574_1	0.957824	9.79044e-07	0.00141826	MSTRG_6574
MSTRG_10019_1	MSTRG_6712_1	0.929902	1.18401e-05	0.00557765	MSTRG_6712
MSTRG_10019_1	MSTRG_6924_1	0.977061	4.81329e-08	0.000195595	MSTRG_6924
MSTRG_10019_1	MSTRG_6947_1	0.931684	1.04411e-05	0.00523351	MSTRG_6947
MSTRG_10019_1	MSTRG_6951_1	0.91389	3.22213e-05	0.00911127	MSTRG_6951
MSTRG_10019_1	MSTRG_6983_2	0.930615	1.12633e-05	0.00543496	MSTRG_6983
MSTRG_10019_1	MSTRG_7100_1	0.916155	2.83119e-05	0.0085625	MSTRG_7100
MSTRG_10019_1	MSTRG_7152_2	0.946157	3.2548e-06	0.00287287	MSTRG_7152
MSTRG_10019_1	MSTRG_721_1	0.91273	3.43832e-05	0.00939867	MSTRG_721
MSTRG_10019_1	MSTRG_7264_1	0.927499	1.39558e-05	0.00605384	MSTRG_7264
MSTRG_10019_1	MSTRG_7492_1	0.936498	7.3056e-06	0.00436904	MSTRG_7492
MSTRG_10019_1	MSTRG_7526_2	0.917778	2.57469e-05	0.00817304	MSTRG_7526
MSTRG_10019_1	MSTRG_7637_1	0.926104	1.53149e-05	0.00632502	MSTRG_7637
MSTRG_10019_1	MSTRG_7672_1	0.93507	8.14528e-06	0.0046179	MSTRG_7672
MSTRG_10019_1	MSTRG_7760_1	0.986751	3.14432e-09	2.89019e-05	MSTRG_7760
MSTRG_10019_1	MSTRG_7894_1	0.944848	3.66193e-06	0.00306302	MSTRG_7894
MSTRG_10019_1	MSTRG_7904_1	0.918591	2.45336e-05	0.00798868	MSTRG_7904
MSTRG_10019_1	MSTRG_8102_2	0.921641	2.03758e-05	0.00730222	MSTRG_8102
MSTRG_10019_1	MSTRG_822_1	0.907085	4.65819e-05	0.0108313	MSTRG_822
MSTRG_10019_1	MSTRG_8261_1	0.932924	9.548e-06	0.0049991	MSTRG_8261
MSTRG_10019_1	MSTRG_8311_1	0.94257	4.46606e-06	0.00339222	MSTRG_8311
MSTRG_10019_1	MSTRG_8432_1	0.912991	3.38859e-05	0.00933427	MSTRG_8432
MSTRG_10019_1	MSTRG_8459_1	0.960246	7.31413e-07	0.00118326	MSTRG_8459
MSTRG_10019_1	MSTRG_8680_1	0.958709	8.81872e-07	0.00133065	MSTRG_8680
MSTRG_10019_1	MSTRG_8839_1	0.933247	9.32502e-06	0.00493729	MSTRG_8839
MSTRG_10019_1	MSTRG_8898_1	0.915304	2.97345e-05	0.00876599	MSTRG_8898
MSTRG_10019_1	MSTRG_9389_1	0.935625	7.81e-06	0.0045217	MSTRG_9389
MSTRG_10019_1	MSTRG_9401_1	0.900064	6.62391e-05	0.012723	MSTRG_9401
MSTRG_10019_1	MSTRG_9457_2	0.904407	5.34435e-05	0.0115214	MSTRG_9457
MSTRG_10019_1	MSTRG_9504_2	0.926087	1.53319e-05	0.00632835	MSTRG_9504
MSTRG_10019_1	MSTRG_9666_1	0.940112	5.48415e-06	0.00376763	MSTRG_9666
MSTRG_10019_1	MSTRG_9673_2	0.954631	1.4025e-06	0.00176237	MSTRG_9673
MSTRG_10019_1	MSTRG_984_1	0.926109	1.53093e-05	0.00632393	MSTRG_984
MSTRG_10019_1	MSTRG_9934_1	0.907041	4.66889e-05	0.0108426	MSTRG_9934
MSTRG_10019_1	MSTRG_9940_1	0.911654	3.64865e-05	0.00967291	MSTRG_9940
MSTRG_10027_1	Gj10A161T45_mRNA1	0.936428	7.3449e-06	0.0043813	Gj10A161T45
MSTRG_10027_1	Gj10A186T55_mRNA1	0.982391	1.29475e-08	7.89074e-05	Gj10A186T55
MSTRG_10027_1	Gj10A220T69_mRNA1	0.947162	2.96725e-06	0.00272873	Gj10A220T69
MSTRG_10027_1	Gj10A223T63_mRNA1	0.904305	5.37209e-05	0.0115478	Gj10A223T63
MSTRG_10027_1	Gj10A231T121_mRNA1	0.934445	8.53521e-06	0.00472487	Gj10A231T121
MSTRG_10027_1	Gj10A241T82_mRNA1	0.97029	1.73445e-07	0.000471575	Gj10A241T82
MSTRG_10027_1	Gj10A241T83_mRNA1	0.996396	4.75753e-12	1.61433e-07	Gj10A241T83
MSTRG_10027_1	Gj10A248T126_mRNA1	0.971094	1.51406e-07	0.000429066	Gj10A248T126
MSTRG_10027_1	Gj10A254T84_mRNA1	0.959918	7.61703e-07	0.00121462	Gj10A254T84
MSTRG_10027_1	Gj10A255T49_mRNA1	0.90256	5.86221e-05	0.0120227	MSTRG_882
MSTRG_10027_1	Gj10A264T92_mRNA1	0.903008	5.73335e-05	0.0118995	Gj10A264T92
MSTRG_10027_1	Gj10A276T43_mRNA1	0.914513	3.11058e-05	0.0089562	Gj10A276T43
MSTRG_10027_1	Gj10A285T116_mRNA1	0.950305	2.19537e-06	0.00229603	Gj10A285T116
MSTRG_10027_1	Gj10A285T125_mRNA1	0.99591	8.94707e-12	2.70768e-07	MSTRG_1030
MSTRG_10027_1	Gj10A289T106_mRNA1	0.96978	1.88666e-07	0.000499416	Gj10A289T106
MSTRG_10027_1	Gj10A291T80_mRNA1	0.976219	5.75622e-08	0.00022221	Gj10A291T80
MSTRG_10027_1	Gj10A297T137_mRNA1	0.976068	5.93994e-08	0.000227281	MSTRG_1120
MSTRG_10027_1	Gj10A306T166_mRNA1	0.93376	8.98065e-06	0.00484316	Gj10A306T166
MSTRG_10027_1	Gj10A306T174_mRNA1	0.937581	6.71611e-06	0.00418137	Gj10A306T174
MSTRG_10027_1	Gj10A31T15_mRNA1	0.976949	4.93095e-08	0.000198883	Gj10A31T15
MSTRG_10027_1	Gj10A48T34_mRNA1	0.994306	4.66982e-11	1.0771e-06	Gj10A48T34
MSTRG_10027_1	Gj10E197T0_mRNA1	0.909562	4.0868e-05	0.0102044	Gj10E197T0
MSTRG_10027_1	Gj10P151T9_mRNA1	0.921008	2.11894e-05	0.00744455	Gj10P151T9
MSTRG_10027_1	Gj10P197T4_mRNA1	0.937435	6.79331e-06	0.00420665	Gj10P197T4
MSTRG_10027_1	Gj10P248T10_mRNA1	0.976452	5.48203e-08	0.000214472	Gj10P248T10
MSTRG_10027_1	Gj10P278T21_mRNA1	0.995486	1.46534e-11	4.13919e-07	Gj10P278T21
MSTRG_10027_1	Gj10P283T14_mRNA1	0.986076	4.02657e-09	3.44724e-05	MSTRG_1020
MSTRG_10027_1	Gj10P285T13_mRNA1	0.965849	3.45446e-07	0.000739904	Gj10P285T13
MSTRG_10027_1	Gj10P285T26_mRNA1	0.926919	1.45086e-05	0.00616613	Gj10P285T26
MSTRG_10027_1	Gj10P290T12_mRNA1	0.901002	6.32906e-05	0.0124581	Gj10P290T12
MSTRG_10027_1	Gj10P301T18_mRNA1	0.928515	1.30277e-05	0.00585451	MSTRG_1150
MSTRG_10027_1	Gj10P97T0_mRNA1	0.99662	3.45501e-12	1.23847e-07	Gj10P97T0
MSTRG_10027_1	Gj10X117T37_mRNA1	0.979081	3.04583e-08	0.000141967	Gj10X117T37
MSTRG_10027_1	Gj10X145T9_mRNA1	0.929866	1.18694e-05	0.0055848	Gj10X145T9
MSTRG_10027_1	Gj10X167T0_mRNA1	0.951008	2.04673e-06	0.00220219	Gj10X167T0
MSTRG_10027_1	Gj10X177T21_mRNA1	0.965179	3.80276e-07	0.000785985	Gj10X177T21
MSTRG_10027_1	Gj10X190T51_mRNA1	0.954889	1.36378e-06	0.00173407	Gj10X190T51
MSTRG_10027_1	Gj10X214T45_mRNA1	0.967752	2.60165e-07	0.000616948	Gj10X214T45
MSTRG_10027_1	Gj10X237T17_mRNA1	0.992149	2.31811e-10	3.87199e-06	Gj10X237T17
MSTRG_10027_1	Gj10X245T61_mRNA1	0.911957	3.58849e-05	0.00959478	MSTRG_841
MSTRG_10027_1	Gj10X246T26_mRNA1	0.921888	2.00649e-05	0.00724632	Gj10X246T26
MSTRG_10027_1	Gj10X258T28_mRNA1	0.966339	3.21649e-07	0.000706654	Gj10X258T28
MSTRG_10027_1	Gj10X260T63_mRNA1	0.97332	1.01801e-07	0.000328596	Gj10X260T63
MSTRG_10027_1	Gj10X270T38_mRNA1	0.900713	6.41891e-05	0.0125382	Gj10X270T38
MSTRG_10027_1	Gj10X270T7_mRNA1	0.936646	7.2227e-06	0.00434318	Gj10X270T7
MSTRG_10027_1	Gj10X273T29_mRNA1	0.972374	1.20997e-07	0.000367735	Gj10X273T29
MSTRG_10027_1	Gj10X288T57_mRNA1	0.911134	3.75397e-05	0.00980656	Gj10X288T57
MSTRG_10027_1	Gj10X306T94_mRNA1	0.97956	2.71506e-08	0.000132042	Gj10X306T94
MSTRG_10027_1	Gj10X66T19_mRNA1	0.979081	3.04583e-08	0.000141967	Gj10X66T19
MSTRG_10027_1	Gj11A131T18_mRNA1	0.953607	1.56536e-06	0.00187552	Gj11A131T18
MSTRG_10027_1	Gj11A223T12_mRNA1	0.980367	2.22267e-08	0.000115683	Gj11A223T12
MSTRG_10027_1	Gj11A298T94_mRNA1	0.913258	3.33857e-05	0.00926848	Gj11A298T94
MSTRG_10027_1	Gj11A300T59_mRNA1	0.926866	1.456e-05	0.00617634	Gj11A300T59
MSTRG_10027_1	Gj11A310T67_mRNA1	0.935896	7.65071e-06	0.00447456	Gj11A310T67
MSTRG_10027_1	Gj11A315T30_mRNA1	0.915252	2.98222e-05	0.00877819	Gj11A315T30
MSTRG_10027_1	Gj11A318T97_mRNA1	0.983765	8.64419e-09	5.92003e-05	Gj11A318T97
MSTRG_10027_1	Gj11A319T152_mRNA1	0.936111	7.52578e-06	0.0044369	Gj11A319T152
MSTRG_10027_1	Gj11A321T65_mRNA1	0.928064	1.34331e-05	0.00594332	Gj11A321T65
MSTRG_10027_1	Gj11A322T73_mRNA1	0.946914	3.03623e-06	0.0027639	Gj11A322T73
MSTRG_10027_1	Gj11A328T59_mRNA1	0.959396	8.11897e-07	0.00126465	Gj11A328T59
MSTRG_10027_1	Gj11A336T94_mRNA1	0.979081	3.04583e-08	0.000141967	Gj11A336T94
MSTRG_10027_1	Gj11A345T86_mRNA1	0.987071	2.78382e-09	2.63823e-05	Gj11A345T86
MSTRG_10027_1	Gj11A345T89_mRNA1	0.985315	5.24683e-09	4.10488e-05	Gj11A345T89
MSTRG_10027_1	Gj11A349T54_mRNA1	0.9735	9.84501e-08	0.000321259	Gj11A349T54
MSTRG_10027_1	Gj11A362T86_mRNA1	0.909272	4.1507e-05	0.0102768	Gj11A362T86
MSTRG_10027_1	Gj11A371T69_mRNA1	0.94891	2.51524e-06	0.00248547	Gj11A371T69
MSTRG_10027_1	Gj11A371T70_mRNA1	0.995482	1.47136e-11	4.15364e-07	Gj11A371T70
MSTRG_10027_1	Gj11A372T66_mRNA1	0.993729	7.55485e-11	1.59433e-06	Gj11A372T66
MSTRG_10027_1	Gj11A373T50_mRNA1	0.987442	2.40831e-09	2.35865e-05	Gj11A373T50
MSTRG_10027_1	Gj11A386T86_mRNA1	0.992209	2.23117e-10	3.75994e-06	Gj11A386T86
MSTRG_10027_1	Gj11A399T80_mRNA1	0.914083	3.18724e-05	0.00906302	Gj11A399T80
MSTRG_10027_1	Gj11A408T82_mRNA1	0.96202	5.8389e-07	0.00102581	Gj11A408T82
MSTRG_10027_1	Gj11A413T106_mRNA1	0.983603	9.08259e-09	6.12597e-05	Gj11A413T106
MSTRG_10027_1	Gj11A423T69_mRNA1	0.962633	5.38805e-07	0.000974375	Gj11A423T69
MSTRG_10027_1	Gj11A425T108_mRNA1	0.952917	1.68339e-06	0.00195918	Gj11A425T108
MSTRG_10027_1	Gj11A426T77_mRNA1	0.915894	2.87426e-05	0.0086252	MSTRG_1787
MSTRG_10027_1	Gj11A430T86_mRNA1	0.92566	1.57681e-05	0.0064184	Gj11A430T86
MSTRG_10027_1	Gj11A434T77_mRNA1	0.969505	1.97331e-07	0.000514708	Gj11A434T77
MSTRG_10027_1	Gj11A75T54_mRNA1	0.950424	2.1697e-06	0.00228006	MSTRG_1215
MSTRG_10027_1	Gj11A86T29_mRNA1	0.996144	6.66667e-12	2.13503e-07	Gj11A86T29
MSTRG_10027_1	Gj11A99T56_mRNA1	0.939217	5.89712e-06	0.00390723	Gj11A99T56
MSTRG_10027_1	Gj11E255T1_mRNA1	0.985948	4.21437e-09	3.5561e-05	Gj11E255T1
MSTRG_10027_1	Gj11P215T1_mRNA1	0.996628	3.41482e-12	1.2272e-07	Gj11P215T1
MSTRG_10027_1	Gj11P221T2_mRNA1	0.963219	4.98406e-07	0.000929166	Gj11P221T2
MSTRG_10027_1	Gj11P24T3_mRNA1	0.961651	6.12457e-07	0.00105806	Gj11P24T3
MSTRG_10027_1	Gj11P261T3_mRNA1	0.900131	6.60261e-05	0.0127036	Gj11P261T3
MSTRG_10027_1	Gj11P308T7_mRNA1	0.90203	6.01796e-05	0.0121708	Gj11P308T7
MSTRG_10027_1	Gj11P334T22_mRNA1	0.984376	7.14277e-09	5.16404e-05	Gj11P334T22
MSTRG_10027_1	Gj11P336T17_mRNA1	0.974526	8.0948e-08	0.000280791	Gj11P336T17
MSTRG_10027_1	Gj11P336T21_mRNA1	0.969932	1.84027e-07	0.000491043	Gj11P336T21
MSTRG_10027_1	Gj11P336T22_mRNA1	0.985168	5.51395e-09	4.24904e-05	Gj11P336T22
MSTRG_10027_1	Gj11P338T9_mRNA1	0.994888	2.72524e-11	6.90499e-07	Gj11P338T9
MSTRG_10027_1	Gj11P346T7_mRNA1	0.989515	9.80702e-10	1.16441e-05	Gj11P346T7
MSTRG_10027_1	Gj11P369T6_mRNA1	0.937803	6.59977e-06	0.00414276	Gj11P369T6
MSTRG_10027_1	Gj11P372T3_mRNA1	0.974562	8.03783e-08	0.000279494	Gj11P372T3
MSTRG_10027_1	Gj11P373T8_mRNA1	0.939018	5.99232e-06	0.00393801	Gj11P373T8
MSTRG_10027_1	Gj11P374T7_mRNA1	0.987811	2.07632e-09	2.10451e-05	Gj11P374T7
MSTRG_10027_1	Gj11P381T15_mRNA1	0.963369	4.88452e-07	0.000917967	Gj11P381T15
MSTRG_10027_1	Gj11P408T20_mRNA1	0.940509	5.30844e-06	0.00370506	MSTRG_1673
MSTRG_10027_1	Gj11P412T17_mRNA1	0.988566	1.50964e-09	1.64406e-05	Gj11P412T17
MSTRG_10027_1	Gj11P412T18_mRNA1	0.986906	2.96564e-09	2.76723e-05	Gj11P412T18
MSTRG_10027_1	Gj11P48T1_mRNA1	0.946643	3.11314e-06	0.00280229	Gj11P48T1
MSTRG_10027_1	Gj11X217T56_mRNA1	0.968231	2.41602e-07	0.00058845	Gj11X217T56
MSTRG_10027_1	Gj11X232T19_mRNA1	0.947267	2.93847e-06	0.00271385	Gj11X232T19
MSTRG_10027_1	Gj11X232T23_mRNA1	0.993765	7.3431e-11	1.558e-06	Gj11X232T23
MSTRG_10027_1	Gj11X233T20_mRNA1	0.964846	3.98581e-07	0.000809348	Gj11X233T20
MSTRG_10027_1	Gj11X253T23_mRNA1	0.996394	4.77263e-12	1.61869e-07	Gj11X253T23
MSTRG_10027_1	Gj11X297T17_mRNA1	0.995837	9.77707e-12	2.91093e-07	Gj11X297T17
MSTRG_10027_1	Gj11X297T19_mRNA1	0.979081	3.04583e-08	0.000141967	Gj11X297T19
MSTRG_10027_1	Gj11X302T3_mRNA1	0.991019	4.53333e-10	6.41483e-06	Gj11X302T3
MSTRG_10027_1	Gj11X329T7_mRNA1	0.979081	3.04583e-08	0.000141967	Gj11X329T7
MSTRG_10027_1	Gj11X329T8_mRNA1	0.909127	4.18306e-05	0.0103135	Gj11X329T8
MSTRG_10027_1	Gj11X333T53_mRNA1	0.979081	3.04583e-08	0.000141967	Gj11X333T53
MSTRG_10027_1	Gj11X347T35_mRNA1	0.930015	1.17475e-05	0.00555497	Gj11X347T35
MSTRG_10027_1	Gj11X362T76_mRNA1	0.937856	6.57229e-06	0.00413354	Gj11X362T76
MSTRG_10027_1	Gj11X389T12_mRNA1	0.963277	4.9453e-07	0.000924826	Gj11X389T12
MSTRG_10027_1	Gj11X408T44_mRNA1	0.98561	4.74333e-09	3.84651e-05	Gj11X408T44
MSTRG_10027_1	Gj11X418T75_mRNA1	0.980555	2.11933e-08	0.000112008	Gj11X418T75
MSTRG_10027_1	Gj11X58T19_mRNA1	0.904765	5.24835e-05	0.0114289	Gj11X58T19
MSTRG_10027_1	Gj1A0T50_mRNA1	0.982087	1.40975e-08	8.38464e-05	Gj1A0T50
MSTRG_10027_1	Gj1A11T96_mRNA1	0.904583	5.29712e-05	0.0114761	MSTRG_73
MSTRG_10027_1	Gj1A154T25_mRNA1	0.994234	4.97238e-11	1.13312e-06	Gj1A154T25
MSTRG_10027_1	Gj1A16T56_mRNA1	0.967343	2.76931e-07	0.00064167	Gj1A16T56
MSTRG_10027_1	Gj1A1T78_mRNA1	0.965613	3.57402e-07	0.000756095	MSTRG_11
MSTRG_10027_1	Gj1A246T48_mRNA1	0.944945	3.6304e-06	0.00304901	MSTRG_370
MSTRG_10027_1	Gj1A257T29_mRNA1	0.936033	7.57134e-06	0.0044507	Gj1A257T29
MSTRG_10027_1	Gj1A30T67_mRNA1	0.928789	1.27855e-05	0.0058001	Gj1A30T67
MSTRG_10027_1	Gj1A423T33_mRNA1	0.946125	3.26423e-06	0.00287751	Gj1A423T33
MSTRG_10027_1	Gj1A434T58_mRNA1	0.95841	9.13794e-07	0.00135949	Gj1A434T58
MSTRG_10027_1	Gj1A435T18_mRNA1	0.956174	1.18276e-06	0.00159288	Gj1A435T18
MSTRG_10027_1	Gj1A43T75_mRNA1	0.910872	3.80801e-05	0.00987364	Gj1A43T75
MSTRG_10027_1	Gj1A450T83_mRNA1	0.920019	2.25109e-05	0.00766529	Gj1A450T83
MSTRG_10027_1	Gj1A464T71_mRNA1	0.958627	8.90505e-07	0.00133851	MSTRG_467
MSTRG_10027_1	Gj1A464T73_mRNA1	0.996256	5.75429e-12	1.89369e-07	MSTRG_473
MSTRG_10027_1	Gj1A464T74_mRNA1	0.985431	5.04373e-09	4.00158e-05	Gj1A464T74
MSTRG_10027_1	Gj1A475T60_mRNA1	0.921511	2.05406e-05	0.00733151	MSTRG_485
MSTRG_10027_1	Gj1A482T44_mRNA1	0.937286	6.87248e-06	0.00423243	Gj1A482T44
MSTRG_10027_1	Gj1A489T74_mRNA1	0.930157	1.16309e-05	0.00552615	Gj1A489T74
MSTRG_10027_1	Gj1A494T57_mRNA1	0.996842	2.46203e-12	9.41946e-08	Gj1A494T57
MSTRG_10027_1	Gj1A4T95_mRNA1	0.981452	1.67613e-08	9.48673e-05	MSTRG_28
MSTRG_10027_1	Gj1A507T92_mRNA1	0.905828	4.971e-05	0.0111536	Gj1A507T92
MSTRG_10027_1	Gj1A507T93_mRNA1	0.942993	4.30695e-06	0.00332878	Gj1A507T93
MSTRG_10027_1	Gj1A510T70_mRNA1	0.910728	3.83786e-05	0.00991026	Gj1A510T70
MSTRG_10027_1	Gj1A512T104_mRNA1	0.955172	1.32217e-06	0.00170297	Gj1A512T104
MSTRG_10027_1	Gj1A533T50_mRNA1	0.951099	2.02821e-06	0.00219014	Gj1A533T50
MSTRG_10027_1	Gj1A539T70_mRNA1	0.94797	2.75082e-06	0.00261403	Gj1A539T70
MSTRG_10027_1	Gj1A6T96_mRNA1	0.922587	1.92064e-05	0.00708864	Gj1A6T96
MSTRG_10027_1	Gj1A73T35_mRNA1	0.975775	6.30879e-08	0.000237196	Gj1A73T35
MSTRG_10027_1	Gj1A80T112_mRNA1	0.924287	1.72388e-05	0.00671695	Gj1A80T112
MSTRG_10027_1	Gj1A97T50_mRNA1	0.949962	2.27083e-06	0.00234225	Gj1A97T50
MSTRG_10027_1	Gj1E137T0_mRNA1	0.940989	5.10167e-06	0.00363122	Gj1E137T0
MSTRG_10027_1	Gj1E320T0_mRNA1	0.968857	2.18965e-07	0.000551538	Gj1E320T0
MSTRG_10027_1	Gj1P114T0_mRNA1	0.97652	5.40383e-08	0.000212229	Gj1P114T0
MSTRG_10027_1	Gj1P11T10_mRNA1	0.967442	2.72773e-07	0.000635497	MSTRG_70
MSTRG_10027_1	Gj1P11T16_mRNA1	0.946582	3.13061e-06	0.00281089	Gj1P11T16
MSTRG_10027_1	Gj1P14T16_mRNA1	0.986074	4.03028e-09	3.44942e-05	Gj1P14T16
MSTRG_10027_1	Gj1P16T13_mRNA1	0.983369	9.74349e-09	6.42489e-05	Gj1P16T13
MSTRG_10027_1	Gj1P16T14_mRNA1	0.936624	7.23526e-06	0.00434706	Gj1P16T14
MSTRG_10027_1	Gj1P17T3_mRNA1	0.94496	3.62575e-06	0.00304693	Gj1P17T3
MSTRG_10027_1	Gj1P27T14_mRNA1	0.9734	1.00297e-07	0.000325321	Gj1P27T14
MSTRG_10027_1	Gj1P28T6_mRNA1	0.958393	9.15666e-07	0.00136117	Gj1P28T6
MSTRG_10027_1	Gj1P304T7_mRNA1	0.991658	3.13806e-10	4.88273e-06	Gj1P304T7
MSTRG_10027_1	Gj1P30T4_mRNA1	0.954275	1.45756e-06	0.00180148	Gj1P30T4
MSTRG_10027_1	Gj1P34T6_mRNA1	0.911449	3.68996e-05	0.0097258	Gj1P34T6
MSTRG_10027_1	Gj1P451T4_mRNA1	0.966942	2.94135e-07	0.000666975	MSTRG_455
MSTRG_10027_1	Gj1P462T8_mRNA1	0.997981	2.62901e-13	1.3106e-08	Gj1P462T8
MSTRG_10027_1	Gj1P477T9_mRNA1	0.961829	5.98517e-07	0.00104244	Gj1P477T9
MSTRG_10027_1	Gj1P47T6_mRNA1	0.960547	7.04516e-07	0.00115517	Gj1P47T6
MSTRG_10027_1	Gj1P508T12_mRNA1	0.991041	4.47842e-10	6.3539e-06	MSTRG_570
MSTRG_10027_1	Gj1P508T13_mRNA1	0.991725	3.01286e-10	4.73345e-06	MSTRG_572
MSTRG_10027_1	Gj1P51T11_mRNA1	0.978767	3.27969e-08	0.00014938	Gj1P51T11
MSTRG_10027_1	Gj1P521T13_mRNA1	0.958915	8.60416e-07	0.00131086	Gj1P521T13
MSTRG_10027_1	Gj1P52T13_mRNA1	0.962444	5.52442e-07	0.000989729	Gj1P52T13
MSTRG_10027_1	Gj1P540T8_mRNA1	0.931431	1.0632e-05	0.00528102	Gj1P540T8
MSTRG_10027_1	Gj1P5T12_mRNA1	0.932899	9.56522e-06	0.00500382	Gj1P5T12
MSTRG_10027_1	Gj1P70T7_mRNA1	0.908674	4.28485e-05	0.0104285	Gj1P70T7
MSTRG_10027_1	Gj1P80T8_mRNA1	0.984272	7.38267e-09	5.29043e-05	Gj1P80T8
MSTRG_10027_1	Gj1P8T13_mRNA1	0.99211	2.37572e-10	3.94602e-06	MSTRG_49
MSTRG_10027_1	Gj1P8T14_mRNA1	0.994934	2.60623e-11	6.6683e-07	MSTRG_50
MSTRG_10027_1	Gj1P92T1_mRNA1	0.915264	2.98014e-05	0.0087753	Gj1P92T1
MSTRG_10027_1	Gj1P96T0_mRNA1	0.950251	2.2071e-06	0.00230328	Gj1P96T0
MSTRG_10027_1	Gj1X132T39_mRNA1	0.912029	3.57424e-05	0.00957608	MSTRG_311
MSTRG_10027_1	Gj1X139T12_mRNA1	0.959304	8.20984e-07	0.00127346	Gj1X139T12
MSTRG_10027_1	Gj1X172T10_mRNA1	0.914322	3.14449e-05	0.00900353	Gj1X172T10
MSTRG_10027_1	Gj1X176T18_mRNA1	0.922219	1.96543e-05	0.00717161	Gj1X176T18
MSTRG_10027_1	Gj1X184T7_mRNA1	0.99495	2.56466e-11	6.58454e-07	Gj1X184T7
MSTRG_10027_1	Gj1X184T9_mRNA1	0.996602	3.5465e-12	1.26392e-07	Gj1X184T9
MSTRG_10027_1	Gj1X229T4_mRNA1	0.99638	4.86899e-12	1.64643e-07	Gj1X229T4
MSTRG_10027_1	Gj1X254T29_mRNA1	0.939503	5.76277e-06	0.00386292	Gj1X254T29
MSTRG_10027_1	Gj1X293T0_mRNA1	0.977816	4.0771e-08	0.000174123	Gj1X293T0
MSTRG_10027_1	Gj1X341T3_mRNA1	0.988651	1.45471e-09	1.5969e-05	Gj1X341T3
MSTRG_10027_1	Gj1X457T16_mRNA1	0.975958	6.07642e-08	0.00023099	Gj1X457T16
MSTRG_10027_1	Gj1X511T24_mRNA1	0.938018	6.48918e-06	0.00410545	Gj1X511T24
MSTRG_10027_1	Gj1X516T44_mRNA1	0.977045	4.82994e-08	0.000196063	Gj1X516T44
MSTRG_10027_1	Gj1X535T5_mRNA1	0.939039	5.98219e-06	0.00393476	Gj1X535T5
MSTRG_10027_1	Gj1X536T52_mRNA1	0.976018	6.00147e-08	0.000228959	Gj1X536T52
MSTRG_10027_1	Gj1X96T39_mRNA1	0.95157	1.93395e-06	0.00212876	Gj1X96T39
MSTRG_10027_1	Gj1X97T23_mRNA1	0.96377	4.62598e-07	0.00088802	Gj1X97T23
MSTRG_10027_1	Gj1X99T12_mRNA1	0.979081	3.04583e-08	0.000141967	Gj1X99T12
MSTRG_10027_1	Gj2A108T21_mRNA1	0.972627	1.15588e-07	0.000357176	Gj2A108T21
MSTRG_10027_1	Gj2A110T21_mRNA1	0.979081	3.04583e-08	0.000141967	Gj2A110T21
MSTRG_10027_1	Gj2A112T27_mRNA1	0.940989	5.1019e-06	0.0036313	Gj2A112T27
MSTRG_10027_1	Gj2A112T28_mRNA1	0.979081	3.04583e-08	0.000141967	Gj2A112T28
MSTRG_10027_1	Gj2A19T67_mRNA1	0.927603	1.38587e-05	0.00603365	Gj2A19T67
MSTRG_10027_1	Gj2A270T35_mRNA1	0.997569	6.6569e-13	3.09323e-08	Gj2A270T35
MSTRG_10027_1	Gj2A32T68_mRNA1	0.935364	7.96633e-06	0.00456706	Gj2A32T68
MSTRG_10027_1	Gj2A336T33_mRNA1	0.96764	2.64691e-07	0.000623669	Gj2A336T33
MSTRG_10027_1	Gj2A355T116_mRNA1	0.971914	1.31289e-07	0.000387884	Gj2A355T116
MSTRG_10027_1	Gj2A357T44_mRNA1	0.99516	2.07523e-11	5.55303e-07	MSTRG_2216
MSTRG_10027_1	Gj2A369T122_mRNA1	0.922498	1.93143e-05	0.00710881	Gj2A369T122
MSTRG_10027_1	Gj2A36T82_mRNA1	0.979787	2.56878e-08	0.000127372	Gj2A36T82
MSTRG_10027_1	Gj2A370T81_mRNA1	0.979589	2.6964e-08	0.000131456	MSTRG_2266
MSTRG_10027_1	Gj2A375T85_mRNA1	0.974831	7.62531e-08	0.000269938	Gj2A375T85
MSTRG_10027_1	Gj2A375T86_mRNA1	0.970932	1.55645e-07	0.000437488	Gj2A375T86
MSTRG_10027_1	Gj2A376T96_mRNA1	0.97473	7.77918e-08	0.000273529	Gj2A376T96
MSTRG_10027_1	Gj2A381T139_mRNA1	0.910579	3.86901e-05	0.00994816	Gj2A381T139
MSTRG_10027_1	Gj2A384T60_mRNA1	0.947872	2.77651e-06	0.00262763	Gj2A384T60
MSTRG_10027_1	Gj2A385T105_mRNA1	0.907243	4.61981e-05	0.0107907	MSTRG_2349
MSTRG_10027_1	Gj2A38T56_mRNA1	0.911458	3.68811e-05	0.00972345	Gj2A38T56
MSTRG_10027_1	Gj2A417T62_mRNA1	0.936822	7.12506e-06	0.00431283	Gj2A417T62
MSTRG_10027_1	Gj2A420T79_mRNA1	0.986457	3.50745e-09	3.12912e-05	Gj2A420T79
MSTRG_10027_1	Gj2A421T63_mRNA1	0.984031	7.9631e-09	5.58721e-05	Gj2A421T63
MSTRG_10027_1	Gj2A421T64_mRNA1	0.979769	2.57986e-08	0.000127732	Gj2A421T64
MSTRG_10027_1	Gj2A426T34_mRNA1	0.95248	1.76161e-06	0.00201375	Gj2A426T34
MSTRG_10027_1	Gj2A449T60_mRNA1	0.957493	1.01751e-06	0.00145174	Gj2A449T60
MSTRG_10027_1	Gj2A453T103_mRNA1	0.967159	2.84709e-07	0.000653037	Gj2A453T103
MSTRG_10027_1	Gj2A459T59_mRNA1	0.954242	1.46269e-06	0.00180506	Gj2A459T59
MSTRG_10027_1	Gj2A498T68_mRNA1	0.915044	3.01796e-05	0.00882756	Gj2A498T68
MSTRG_10027_1	Gj2A67T58_mRNA1	0.940964	5.11228e-06	0.00363495	MSTRG_1986
MSTRG_10027_1	Gj2P100T2_mRNA1	0.987109	2.74402e-09	2.60945e-05	Gj2P100T2
MSTRG_10027_1	Gj2P25T7_mRNA1	0.978178	3.75706e-08	0.000164189	Gj2P25T7
MSTRG_10027_1	Gj2P27T4_mRNA1	0.905409	5.07897e-05	0.0112612	Gj2P27T4
MSTRG_10027_1	Gj2P300T6_mRNA1	0.956308	1.16507e-06	0.00157825	Gj2P300T6
MSTRG_10027_1	Gj2P351T10_mRNA1	0.993306	1.04687e-10	2.05737e-06	Gj2P351T10
MSTRG_10027_1	Gj2P375T10_mRNA1	0.979762	2.5843e-08	0.000127876	Gj2P375T10
MSTRG_10027_1	Gj2P375T13_mRNA1	0.958734	8.79274e-07	0.00132827	Gj2P375T13
MSTRG_10027_1	Gj2P376T11_mRNA1	0.976541	5.37941e-08	0.000211549	Gj2P376T11
MSTRG_10027_1	Gj2P381T21_mRNA1	0.900394	6.51899e-05	0.0126268	Gj2P381T21
MSTRG_10027_1	Gj2P38T8_mRNA1	0.911515	3.67659e-05	0.00970876	Gj2P38T8
MSTRG_10027_1	Gj2P393T10_mRNA1	0.996619	3.46034e-12	1.23996e-07	Gj2P393T10
MSTRG_10027_1	Gj2P394T10_mRNA1	0.994725	3.18949e-11	7.87365e-07	Gj2P394T10
MSTRG_10027_1	Gj2P413T5_mRNA1	0.972374	1.20995e-07	0.000367732	Gj2P413T5
MSTRG_10027_1	Gj2P413T6_mRNA1	0.979081	3.04583e-08	0.000141967	Gj2P413T6
MSTRG_10027_1	Gj2P417T12_mRNA1	0.932645	9.74344e-06	0.00505216	Gj2P417T12
MSTRG_10027_1	Gj2P420T12_mRNA1	0.963419	4.8515e-07	0.000914213	Gj2P420T12
MSTRG_10027_1	Gj2P421T7_mRNA1	0.986754	3.14051e-09	2.88761e-05	Gj2P421T7
MSTRG_10027_1	Gj2P48T3_mRNA1	0.933645	9.057e-06	0.00486397	Gj2P48T3
MSTRG_10027_1	Gj2P67T10_mRNA1	0.986927	2.94203e-09	2.75071e-05	Gj2P67T10
MSTRG_10027_1	Gj2P76T2_mRNA1	0.912578	3.46729e-05	0.00943573	Gj2P76T2
MSTRG_10027_1	Gj2X11T18_mRNA1	0.979081	3.04583e-08	0.000141967	Gj2X11T18
MSTRG_10027_1	Gj2X180T10_mRNA1	0.979081	3.04583e-08	0.000141967	Gj2X180T10
MSTRG_10027_1	Gj2X185T26_mRNA1	0.92495	1.65153e-05	0.00657158	Gj2X185T26
MSTRG_10027_1	Gj2X248T8_mRNA1	0.923331	1.83241e-05	0.00692405	Gj2X248T8
MSTRG_10027_1	Gj2X249T15_mRNA1	0.996675	3.18212e-12	1.16077e-07	Gj2X249T15
MSTRG_10027_1	Gj2X306T6_mRNA1	0.902555	5.86378e-05	0.0120242	Gj2X306T6
MSTRG_10027_1	Gj2X318T53_mRNA1	0.948493	2.61778e-06	0.00254257	Gj2X318T53
MSTRG_10027_1	Gj2X354T45_mRNA1	0.993297	1.05369e-10	2.06744e-06	Gj2X354T45
MSTRG_10027_1	Gj2X379T71_mRNA1	0.979495	2.75817e-08	0.000133384	Gj2X379T71
MSTRG_10027_1	Gj2X388T39_mRNA1	0.958874	8.64639e-07	0.00131478	Gj2X388T39
MSTRG_10027_1	Gj2X390T60_mRNA1	0.907171	4.63736e-05	0.0108093	Gj2X390T60
MSTRG_10027_1	Gj2X397T78_mRNA1	0.931222	1.07906e-05	0.00531987	MSTRG_2435
MSTRG_10027_1	Gj2X399T79_mRNA1	0.949309	2.42019e-06	0.00243106	Gj2X399T79
MSTRG_10027_1	Gj2X402T26_mRNA1	0.913507	3.29229e-05	0.00920668	Gj2X402T26
MSTRG_10027_1	Gj2X405T44_mRNA1	0.975423	6.77715e-08	0.0002493	Gj2X405T44
MSTRG_10027_1	Gj2X409T21_mRNA1	0.969021	2.13321e-07	0.000541948	Gj2X409T21
MSTRG_10027_1	Gj2X414T35_mRNA1	0.979081	3.04583e-08	0.000141967	Gj2X414T35
MSTRG_10027_1	Gj2X420T63_mRNA1	0.93187	1.03035e-05	0.0051987	Gj2X420T63
MSTRG_10027_1	Gj2X421T26_mRNA1	0.982531	1.24436e-08	7.66657e-05	Gj2X421T26
MSTRG_10027_1	Gj2X422T36_mRNA1	0.993575	8.53011e-11	1.75674e-06	Gj2X422T36
MSTRG_10027_1	Gj2X433T24_mRNA1	0.978824	3.23648e-08	0.00014798	Gj2X433T24
MSTRG_10027_1	Gj2X437T18_mRNA1	0.931091	1.08913e-05	0.00534422	MSTRG_2513
MSTRG_10027_1	Gj2X450T40_mRNA1	0.975777	6.30642e-08	0.000237133	Gj2X450T40
MSTRG_10027_1	Gj2X450T42_mRNA1	0.976553	5.36606e-08	0.000211177	Gj2X450T42
MSTRG_10027_1	Gj2X481T31_mRNA1	0.953013	1.66658e-06	0.00194728	Gj2X481T31
MSTRG_10027_1	Gj2X485T4_mRNA1	0.938029	6.48335e-06	0.00410347	Gj2X485T4
MSTRG_10027_1	Gj2X490T5_mRNA1	0.9343	8.62822e-06	0.00474965	Gj2X490T5
MSTRG_10027_1	Gj2X499T74_mRNA1	0.974801	7.67052e-08	0.000270994	Gj2X499T74
MSTRG_10027_1	Gj3A103T68_mRNA1	0.943344	4.17848e-06	0.00327826	Gj3A103T68
MSTRG_10027_1	Gj3A11T67_mRNA1	0.913783	3.24166e-05	0.00913804	Gj3A11T67
MSTRG_10027_1	Gj3A150T24_mRNA1	0.906122	4.89645e-05	0.0110785	MSTRG_2698
MSTRG_10027_1	Gj3A21T69_mRNA1	0.994374	4.39624e-11	1.02579e-06	Gj3A21T69
MSTRG_10027_1	Gj3A279T67_mRNA1	0.929441	1.22247e-05	0.0056701	Gj3A279T67
MSTRG_10027_1	Gj3A27T42_mRNA1	0.97196	1.30243e-07	0.00038577	Gj3A27T42
MSTRG_10027_1	Gj3A287T77_mRNA1	0.956267	1.17053e-06	0.00158279	Gj3A287T77
MSTRG_10027_1	Gj3A289T54_mRNA1	0.94963	2.34588e-06	0.00238747	Gj3A289T54
MSTRG_10027_1	Gj3A290T61_mRNA1	0.983145	1.04137e-08	6.71469e-05	Gj3A290T61
MSTRG_10027_1	Gj3A303T74_mRNA1	0.959694	7.82854e-07	0.00123599	Gj3A303T74
MSTRG_10027_1	Gj3A309T82_mRNA1	0.93802	6.48783e-06	0.00410499	Gj3A309T82
MSTRG_10027_1	Gj3A322T87_mRNA1	0.924774	1.67053e-05	0.00661036	Gj3A322T87
MSTRG_10027_1	Gj3A325T82_mRNA1	0.941074	5.06581e-06	0.00361854	Gj3A325T82
MSTRG_10027_1	Gj3A327T56_mRNA1	0.958229	9.33522e-07	0.00137747	Gj3A327T56
MSTRG_10027_1	Gj3A333T56_mRNA1	0.985238	5.38519e-09	4.1801e-05	Gj3A333T56
MSTRG_10027_1	Gj3A346T117_mRNA1	0.985464	4.98837e-09	3.97351e-05	Gj3A346T117
MSTRG_10027_1	Gj3A3T48_mRNA1	0.955566	1.26581e-06	0.00165955	MSTRG_2590
MSTRG_10027_1	Gj3A3T49_mRNA1	0.94434	3.83051e-06	0.00313605	MSTRG_2591
MSTRG_10027_1	Gj3A49T24_mRNA1	0.968333	2.37797e-07	0.000582417	Gj3A49T24
MSTRG_10027_1	Gj3A6T88_mRNA1	0.942973	4.31452e-06	0.00333171	Gj3A6T88
MSTRG_10027_1	Gj3A8T62_mRNA1	0.994451	4.10658e-11	9.70149e-07	Gj3A8T62
MSTRG_10027_1	Gj3A98T76_mRNA1	0.973775	9.34921e-08	0.000310106	Gj3A98T76
MSTRG_10027_1	Gj3E308T8_mRNA1	0.995592	1.30056e-11	3.73667e-07	Gj3E308T8
MSTRG_10027_1	Gj3P190T6_mRNA1	0.900748	6.40799e-05	0.0125285	Gj3P190T6
MSTRG_10027_1	Gj3P26T3_mRNA1	0.918559	2.4581e-05	0.00799593	Gj3P26T3
MSTRG_10027_1	Gj3P27T7_mRNA1	0.932573	9.79437e-06	0.00506582	Gj3P27T7
MSTRG_10027_1	Gj3P290T7_mRNA1	0.992555	1.77908e-10	3.16235e-06	Gj3P290T7
MSTRG_10027_1	Gj3P297T13_mRNA1	0.945259	3.52988e-06	0.00300356	MSTRG_2847
MSTRG_10027_1	Gj3P316T11_mRNA1	0.992249	2.17483e-10	3.68888e-06	Gj3P316T11
MSTRG_10027_1	Gj3P316T12_mRNA1	0.916957	2.70204e-05	0.00836847	Gj3P316T12
MSTRG_10027_1	Gj3P317T26_mRNA1	0.978958	3.13631e-08	0.000144798	Gj3P317T26
MSTRG_10027_1	Gj3P318T12_mRNA1	0.912206	3.53947e-05	0.00953042	Gj3P318T12
MSTRG_10027_1	Gj3P323T10_mRNA1	0.947956	2.75447e-06	0.00261596	Gj3P323T10
MSTRG_10027_1	Gj3P323T9_mRNA1	0.990711	5.36306e-10	7.34695e-06	Gj3P323T9
MSTRG_10027_1	Gj3P326T16_mRNA1	0.939337	5.84043e-06	0.00388866	Gj3P326T16
MSTRG_10027_1	Gj3P340T20_mRNA1	0.951441	1.95931e-06	0.0021454	Gj3P340T20
MSTRG_10027_1	Gj3P343T12_mRNA1	0.957588	1.0063e-06	0.00144197	Gj3P343T12
MSTRG_10027_1	Gj3P343T17_mRNA1	0.98592	4.25594e-09	3.57977e-05	Gj3P343T17
MSTRG_10027_1	Gj3P4T16_mRNA1	0.962771	5.29092e-07	0.000963519	MSTRG_2592
MSTRG_10027_1	Gj3P58T7_mRNA1	0.965285	3.74598e-07	0.000778695	Gj3P58T7
MSTRG_10027_1	Gj3P60T11_mRNA1	0.910003	3.99135e-05	0.0100939	Gj3P60T11
MSTRG_10027_1	Gj3P61T4_mRNA1	0.989414	1.02849e-09	1.2093e-05	Gj3P61T4
MSTRG_10027_1	Gj3P98T10_mRNA1	0.965671	3.54456e-07	0.000752143	Gj3P98T10
MSTRG_10027_1	Gj3X17T28_mRNA1	0.924757	1.67234e-05	0.00661402	Gj3X17T28
MSTRG_10027_1	Gj3X269T30_mRNA1	0.962773	5.28902e-07	0.000963308	Gj3X269T30
MSTRG_10027_1	Gj3X276T3_mRNA1	0.996117	6.90981e-12	2.19717e-07	Gj3X276T3
MSTRG_10027_1	Gj3X277T11_mRNA1	0.974204	8.61542e-08	0.000292909	Gj3X277T11
MSTRG_10027_1	Gj3X277T6_mRNA1	0.974236	8.56172e-08	0.00029164	Gj3X277T6
MSTRG_10027_1	Gj3X278T14_mRNA1	0.966639	3.07725e-07	0.000686863	Gj3X278T14
MSTRG_10027_1	Gj3X279T22_mRNA1	0.931071	1.09069e-05	0.00534799	Gj3X279T22
MSTRG_10027_1	Gj3X279T51_mRNA1	0.988674	1.43991e-09	1.58406e-05	Gj3X279T51
MSTRG_10027_1	Gj3X282T18_mRNA1	0.908778	4.26142e-05	0.0104023	MSTRG_2785
MSTRG_10027_1	Gj3X297T45_mRNA1	0.996135	6.74549e-12	2.15527e-07	Gj3X297T45
MSTRG_10027_1	Gj3X307T91_mRNA1	0.964487	4.19065e-07	0.000835097	Gj3X307T91
MSTRG_10027_1	Gj3X321T22_mRNA1	0.900966	6.34018e-05	0.012468	Gj3X321T22
MSTRG_10027_1	Gj3X323T42_mRNA1	0.917238	2.65783e-05	0.00829989	Gj3X323T42
MSTRG_10027_1	Gj4A0T68_mRNA1	0.907941	4.45399e-05	0.0106135	MSTRG_3124
MSTRG_10027_1	Gj4A129T66_mRNA1	0.948216	2.6877e-06	0.00258039	Gj4A129T66
MSTRG_10027_1	Gj4A161T30_mRNA1	0.975809	6.26565e-08	0.000236054	Gj4A161T30
MSTRG_10027_1	Gj4A20T83_mRNA1	0.99631	5.35172e-12	1.78291e-07	Gj4A20T83
MSTRG_10027_1	Gj4A20T84_mRNA1	0.996218	6.05138e-12	1.97372e-07	Gj4A20T84
MSTRG_10027_1	Gj4A20T88_mRNA1	0.992334	2.05821e-10	3.53879e-06	Gj4A20T88
MSTRG_10027_1	Gj4A217T42_mRNA1	0.958665	8.86535e-07	0.0013349	Gj4A217T42
MSTRG_10027_1	Gj4A217T93_mRNA1	0.918089	2.5278e-05	0.00810187	Gj4A217T93
MSTRG_10027_1	Gj4A21T33_mRNA1	0.988066	1.86881e-09	1.9402e-05	Gj4A21T33
MSTRG_10027_1	Gj4A224T34_mRNA1	0.979412	2.81412e-08	0.000135103	MSTRG_3456
MSTRG_10027_1	Gj4A22T103_mRNA1	0.985305	5.26513e-09	4.11489e-05	Gj4A22T103
MSTRG_10027_1	Gj4A22T104_mRNA1	0.945515	3.4498e-06	0.00296649	Gj4A22T104
MSTRG_10027_1	Gj4A289T24_mRNA1	0.978802	3.25309e-08	0.000148518	Gj4A289T24
MSTRG_10027_1	Gj4A295T3_mRNA1	0.969503	1.97392e-07	0.000514813	Gj4A295T3
MSTRG_10027_1	Gj4A310T10_mRNA1	0.936697	7.19408e-06	0.00433432	Gj4A310T10
MSTRG_10027_1	Gj4A31T55_mRNA1	0.933247	9.32509e-06	0.00493731	Gj4A31T55
MSTRG_10027_1	Gj4A401T103_mRNA1	0.930419	1.142e-05	0.00547352	Gj4A401T103
MSTRG_10027_1	Gj4A401T105_mRNA1	0.987302	2.5454e-09	2.46281e-05	MSTRG_3537
MSTRG_10027_1	Gj4A409T71_mRNA1	0.977975	3.93375e-08	0.000169695	Gj4A409T71
MSTRG_10027_1	Gj4A421T137_mRNA1	0.99075	5.25008e-10	7.22345e-06	Gj4A421T137
MSTRG_10027_1	Gj4A421T138_mRNA1	0.963002	5.13049e-07	0.000945491	Gj4A421T138
MSTRG_10027_1	Gj4A424T50_mRNA1	0.917471	2.62174e-05	0.00824425	MSTRG_3545
MSTRG_10027_1	Gj4A437T56_mRNA1	0.989619	9.33128e-10	1.11963e-05	Gj4A437T56
MSTRG_10027_1	Gj4A453T29_mRNA1	0.958114	9.46318e-07	0.00138909	MSTRG_3578
MSTRG_10027_1	Gj4A460T73_mRNA1	0.974173	8.66558e-08	0.00029411	MSTRG_3593
MSTRG_10027_1	Gj4A462T60_mRNA1	0.937082	6.98276e-06	0.00426788	Gj4A462T60
MSTRG_10027_1	Gj4A468T59_mRNA1	0.958902	8.61743e-07	0.00131209	Gj4A468T59
MSTRG_10027_1	Gj4A471T78_mRNA1	0.992162	2.29907e-10	3.84734e-06	Gj4A471T78
MSTRG_10027_1	Gj4A474T39_mRNA1	0.979081	3.04583e-08	0.000141967	Gj4A474T39
MSTRG_10027_1	Gj4A478T84_mRNA1	0.942716	4.41051e-06	0.00336979	Gj4A478T84
MSTRG_10027_1	Gj4A494T72_mRNA1	0.997046	1.76259e-12	7.11188e-08	Gj4A494T72
MSTRG_10027_1	Gj4A5T53_mRNA1	0.978822	3.23812e-08	0.000148031	Gj4A5T53
MSTRG_10027_1	Gj4A88T60_mRNA1	0.901062	6.31058e-05	0.0124414	Gj4A88T60
MSTRG_10027_1	Gj4A89T47_mRNA1	0.955686	1.24911e-06	0.00164638	Gj4A89T47
MSTRG_10027_1	Gj4A9T76_mRNA1	0.979081	3.04583e-08	0.000141967	Gj4A9T76
MSTRG_10027_1	Gj4E302T0_mRNA1	0.948772	2.54879e-06	0.00250437	Gj4E302T0
MSTRG_10027_1	Gj4E490T5_mRNA1	0.991906	2.69954e-10	4.34723e-06	Gj4E490T5
MSTRG_10027_1	Gj4P11T17_mRNA1	0.991596	3.25468e-10	5.01921e-06	Gj4P11T17
MSTRG_10027_1	Gj4P130T10_mRNA1	0.979081	3.04583e-08	0.000141967	Gj4P130T10
MSTRG_10027_1	Gj4P15T18_mRNA1	0.949325	2.41652e-06	0.00242893	Gj4P15T18
MSTRG_10027_1	Gj4P15T9_mRNA1	0.945725	3.38483e-06	0.00293584	Gj4P15T9
MSTRG_10027_1	Gj4P17T21_mRNA1	0.972272	1.23223e-07	0.00037198	Gj4P17T21
MSTRG_10027_1	Gj4P20T11_mRNA1	0.986468	3.49392e-09	3.12047e-05	Gj4P20T11
MSTRG_10027_1	Gj4P20T19_mRNA1	0.991353	3.75185e-10	5.57483e-06	Gj4P20T19
MSTRG_10027_1	Gj4P20T20_mRNA1	0.982011	1.43953e-08	8.50868e-05	Gj4P20T20
MSTRG_10027_1	Gj4P218T5_mRNA1	0.968962	2.15323e-07	0.000545362	Gj4P218T5
MSTRG_10027_1	Gj4P21T5_mRNA1	0.992453	1.90357e-10	3.33333e-06	Gj4P21T5
MSTRG_10027_1	Gj4P221T7_mRNA1	0.920663	2.1643e-05	0.00752151	Gj4P221T7
MSTRG_10027_1	Gj4P29T10_mRNA1	0.968353	2.37079e-07	0.000581271	Gj4P29T10
MSTRG_10027_1	Gj4P32T5_mRNA1	0.914458	3.12029e-05	0.00896981	Gj4P32T5
MSTRG_10027_1	Gj4P338T6_mRNA1	0.924447	1.70622e-05	0.00668203	Gj4P338T6
MSTRG_10027_1	Gj4P39T6_mRNA1	0.992084	2.41644e-10	3.99785e-06	Gj4P39T6
MSTRG_10027_1	Gj4P409T2_mRNA1	0.99646	4.34985e-12	1.495e-07	Gj4P409T2
MSTRG_10027_1	Gj4P409T9_mRNA1	0.931942	1.02501e-05	0.00518507	Gj4P409T9
MSTRG_10027_1	Gj4P41T7_mRNA1	0.932794	9.63888e-06	0.0050239	MSTRG_3269
MSTRG_10027_1	Gj4P42T9_mRNA1	0.90612	4.89693e-05	0.011079	Gj4P42T9
MSTRG_10027_1	Gj4P437T3_mRNA1	0.993605	8.33289e-11	1.72453e-06	Gj4P437T3
MSTRG_10027_1	Gj4P44T10_mRNA1	0.974904	7.51707e-08	0.000267391	Gj4P44T10
MSTRG_10027_1	Gj4P44T7_mRNA1	0.994011	6.00737e-11	1.31949e-06	Gj4P44T7
MSTRG_10027_1	Gj4P44T9_mRNA1	0.919881	2.26998e-05	0.00769669	Gj4P44T9
MSTRG_10027_1	Gj4P490T14_mRNA1	0.992026	2.50504e-10	4.10924e-06	Gj4P490T14
MSTRG_10027_1	Gj4P490T16_mRNA1	0.990172	7.1035e-10	9.12786e-06	Gj4P490T16
MSTRG_10027_1	Gj4P494T6_mRNA1	0.997426	8.85514e-13	3.99334e-08	Gj4P494T6
MSTRG_10027_1	Gj4P494T9_mRNA1	0.982423	1.28307e-08	7.83921e-05	MSTRG_3680
MSTRG_10027_1	Gj4P5T14_mRNA1	0.979547	2.724e-08	0.000132321	MSTRG_3158
MSTRG_10027_1	Gj4P81T0_mRNA1	0.923096	1.85999e-05	0.00697597	MSTRG_3338
MSTRG_10027_1	Gj4P81T3_mRNA1	0.937754	6.62556e-06	0.00415137	Gj4P81T3
MSTRG_10027_1	Gj4P8T4_mRNA1	0.931827	1.03349e-05	0.00520668	Gj4P8T4
MSTRG_10027_1	Gj4P9T7_mRNA1	0.906596	4.77789e-05	0.0109566	Gj4P9T7
MSTRG_10027_1	Gj4X102T35_mRNA1	0.979081	3.04583e-08	0.000141967	Gj4X102T35
MSTRG_10027_1	Gj4X130T31_mRNA1	0.985978	4.16992e-09	3.53062e-05	Gj4X130T31
MSTRG_10027_1	Gj4X219T5_mRNA1	0.966056	3.35203e-07	0.000725709	Gj4X219T5
MSTRG_10027_1	Gj4X236T6_mRNA1	0.944454	3.79208e-06	0.00311968	Gj4X236T6
MSTRG_10027_1	Gj4X278T14_mRNA1	0.979081	3.04583e-08	0.000141967	Gj4X278T14
MSTRG_10027_1	Gj4X28T27_mRNA1	0.939046	5.97887e-06	0.00393369	MSTRG_3235
MSTRG_10027_1	Gj4X300T17_mRNA1	0.950447	2.16472e-06	0.00227695	Gj4X300T17
MSTRG_10027_1	Gj4X300T2_mRNA1	0.948623	2.58556e-06	0.00252484	Gj4X300T2
MSTRG_10027_1	Gj4X354T28_mRNA1	0.903209	5.67614e-05	0.0118442	Gj4X354T28
MSTRG_10027_1	Gj4X356T20_mRNA1	0.979081	3.04583e-08	0.000141967	Gj4X356T20
MSTRG_10027_1	Gj4X369T27_mRNA1	0.996394	4.77263e-12	1.61869e-07	Gj4X369T27
MSTRG_10027_1	Gj4X403T62_mRNA1	0.979081	3.04583e-08	0.000141967	Gj4X403T62
MSTRG_10027_1	Gj4X414T6_mRNA1	0.979081	3.04583e-08	0.000141967	Gj4X414T6
MSTRG_10027_1	Gj4X420T83_mRNA1	0.942805	4.37718e-06	0.00335621	Gj4X420T83
MSTRG_10027_1	Gj4X451T2_mRNA1	0.984425	7.0326e-09	5.10523e-05	Gj4X451T2
MSTRG_10027_1	Gj4X467T16_mRNA1	0.903455	5.60661e-05	0.0117771	Gj4X467T16
MSTRG_10027_1	Gj4X508T73_mRNA1	0.982314	1.32293e-08	8.01403e-05	Gj4X508T73
MSTRG_10027_1	Gj5A122T24_mRNA1	0.931189	1.08164e-05	0.00532612	Gj5A122T24
MSTRG_10027_1	Gj5A126T37_mRNA1	0.970889	1.56802e-07	0.000439762	Gj5A126T37
MSTRG_10027_1	Gj5A157T13_mRNA1	0.958586	8.9486e-07	0.00134245	Gj5A157T13
MSTRG_10027_1	Gj5A18T105_mRNA1	0.989167	1.15369e-09	1.32448e-05	Gj5A18T105
MSTRG_10027_1	Gj5A205T20_mRNA1	0.912198	3.54099e-05	0.00953242	Gj5A205T20
MSTRG_10027_1	Gj5A242T17_mRNA1	0.911738	3.6319e-05	0.00965129	Gj5A242T17
MSTRG_10027_1	Gj5A283T18_mRNA1	0.96957	1.95266e-07	0.000511103	Gj5A283T18
MSTRG_10027_1	Gj5A306T75_mRNA1	0.924943	1.65232e-05	0.0065732	Gj5A306T75
MSTRG_10027_1	Gj5A308T79_mRNA1	0.911184	3.74379e-05	0.00979381	Gj5A308T79
MSTRG_10027_1	Gj5A311T30_mRNA1	0.979081	3.04583e-08	0.000141967	Gj5A311T30
MSTRG_10027_1	Gj5A314T102_mRNA1	0.99713	1.525e-12	6.33386e-08	MSTRG_3977
MSTRG_10027_1	Gj5A333T98_mRNA1	0.947592	2.85054e-06	0.00266756	Gj5A333T98
MSTRG_10027_1	Gj5A345T63_mRNA1	0.910893	3.80362e-05	0.00986822	Gj5A345T63
MSTRG_10027_1	Gj5A364T69_mRNA1	0.936951	7.05403e-06	0.0042905	Gj5A364T69
MSTRG_10027_1	Gj5A365T77_mRNA1	0.94883	2.53466e-06	0.00249644	Gj5A365T77
MSTRG_10027_1	Gj5A62T22_mRNA1	0.949188	2.44873e-06	0.00244751	Gj5A62T22
MSTRG_10027_1	Gj5A63T73_mRNA1	0.952463	1.76484e-06	0.00201596	Gj5A63T73
MSTRG_10027_1	Gj5A69T46_mRNA1	0.975424	6.77542e-08	0.000249256	Gj5A69T46
MSTRG_10027_1	Gj5A77T92_mRNA1	0.985893	4.29758e-09	3.60333e-05	Gj5A77T92
MSTRG_10027_1	Gj5A77T94_mRNA1	0.976346	5.60526e-08	0.000217975	MSTRG_3837
MSTRG_10027_1	Gj5P126T2_mRNA1	0.977775	4.11437e-08	0.00017526	Gj5P126T2
MSTRG_10027_1	Gj5P187T5_mRNA1	0.945817	3.35702e-06	0.00292256	Gj5P187T5
MSTRG_10027_1	Gj5P287T5_mRNA1	0.906714	4.7488e-05	0.0109261	MSTRG_3941
MSTRG_10027_1	Gj5P288T5_mRNA1	0.90768	4.51558e-05	0.01068	MSTRG_3944
MSTRG_10027_1	Gj5P314T7_mRNA1	0.917769	2.576e-05	0.00817504	Gj5P314T7
MSTRG_10027_1	Gj5P3T0_mRNA1	0.954048	1.49362e-06	0.00182641	Gj5P3T0
MSTRG_10027_1	Gj5P50T2_mRNA1	0.961846	5.97191e-07	0.00104094	Gj5P50T2
MSTRG_10027_1	Gj5P52T6_mRNA1	0.99315	1.17395e-10	2.25601e-06	Gj5P52T6
MSTRG_10027_1	Gj5P57T14_mRNA1	0.990236	6.87612e-10	8.9035e-06	Gj5P57T14
MSTRG_10027_1	Gj5P68T3_mRNA1	0.969009	2.13727e-07	0.000542638	Gj5P68T3
MSTRG_10027_1	Gj5P69T0_mRNA1	0.986246	3.78855e-09	3.30463e-05	Gj5P69T0
MSTRG_10027_1	Gj5P70T7_mRNA1	0.981494	1.65716e-08	9.40794e-05	Gj5P70T7
MSTRG_10027_1	Gj5P7T3_mRNA1	0.931562	1.05327e-05	0.00525641	Gj5P7T3
MSTRG_10027_1	Gj5P7T4_mRNA1	0.950459	2.16218e-06	0.00227538	Gj5P7T4
MSTRG_10027_1	Gj5P93T6_mRNA1	0.957437	1.02411e-06	0.00145752	Gj5P93T6
MSTRG_10027_1	Gj5P93T7_mRNA1	0.907004	4.67774e-05	0.0108519	Gj5P93T7
MSTRG_10027_1	Gj5X113T19_mRNA1	0.90062	6.44789e-05	0.0125638	MSTRG_3872
MSTRG_10027_1	Gj5X282T4_mRNA1	0.979081	3.04583e-08	0.000141967	Gj5X282T4
MSTRG_10027_1	Gj5X299T64_mRNA1	0.971968	1.30057e-07	0.000385392	Gj5X299T64
MSTRG_10027_1	Gj5X300T27_mRNA1	0.907111	4.65175e-05	0.0108245	Gj5X300T27
MSTRG_10027_1	Gj5X301T27_mRNA1	0.973328	1.01658e-07	0.000328284	Gj5X301T27
MSTRG_10027_1	Gj5X352T5_mRNA1	0.938745	6.12498e-06	0.00398011	Gj5X352T5
MSTRG_10027_1	Gj5X359T8_mRNA1	0.976831	5.05732e-08	0.00020242	Gj5X359T8
MSTRG_10027_1	Gj5X372T6_mRNA1	0.930639	1.12444e-05	0.00543026	MSTRG_4032
MSTRG_10027_1	Gj5X378T18_mRNA1	0.979081	3.04583e-08	0.000141967	Gj5X378T18
MSTRG_10027_1	Gj5X392T10_mRNA1	0.979004	3.10193e-08	0.000143692	Gj5X392T10
MSTRG_10027_1	Gj5X392T13_mRNA1	0.928107	1.33945e-05	0.00593497	Gj5X392T13
MSTRG_10027_1	Gj5X69T10_mRNA1	0.944644	3.72901e-06	0.00309245	Gj5X69T10
MSTRG_10027_1	Gj6A247T10_mRNA1	0.968535	2.30394e-07	0.000570484	Gj6A247T10
MSTRG_10027_1	Gj6A256T50_mRNA1	0.995203	1.9849e-11	5.35306e-07	Gj6A256T50
MSTRG_10027_1	Gj6A265T54_mRNA1	0.987504	2.34943e-09	2.3134e-05	Gj6A265T54
MSTRG_10027_1	Gj6A285T69_mRNA1	0.963949	4.51404e-07	0.000874652	Gj6A285T69
MSTRG_10027_1	Gj6A286T38_mRNA1	0.907935	4.45554e-05	0.0106152	Gj6A286T38
MSTRG_10027_1	Gj6A30T37_mRNA1	0.949529	2.3691e-06	0.00240121	Gj6A30T37
MSTRG_10027_1	Gj6A312T57_mRNA1	0.951457	1.95613e-06	0.00214332	MSTRG_4353
MSTRG_10027_1	Gj6A316T90_mRNA1	0.921793	2.01839e-05	0.00726782	Gj6A316T90
MSTRG_10027_1	Gj6A318T84_mRNA1	0.910823	3.81814e-05	0.00988611	Gj6A318T84
MSTRG_10027_1	Gj6A320T96_mRNA1	0.953307	1.61592e-06	0.00191144	Gj6A320T96
MSTRG_10027_1	Gj6A335T99_mRNA1	0.901309	6.23491e-05	0.0123727	Gj6A335T99
MSTRG_10027_1	Gj6A336T71_mRNA1	0.912729	3.43839e-05	0.00939875	MSTRG_4437
MSTRG_10027_1	Gj6A336T80_mRNA1	0.987204	2.64476e-09	2.53681e-05	Gj6A336T80
MSTRG_10027_1	Gj6A33T82_mRNA1	0.986906	2.96526e-09	2.76697e-05	Gj6A33T82
MSTRG_10027_1	Gj6A49T27_mRNA1	0.903383	5.62695e-05	0.0117968	Gj6A49T27
MSTRG_10027_1	Gj6A69T90_mRNA1	0.922566	1.92313e-05	0.0070933	Gj6A69T90
MSTRG_10027_1	Gj6A96T25_mRNA1	0.933705	9.01661e-06	0.00485299	Gj6A96T25
MSTRG_10027_1	Gj6P187T4_mRNA1	0.960058	7.48592e-07	0.00120116	Gj6P187T4
MSTRG_10027_1	Gj6P225T14_mRNA1	0.930825	1.10983e-05	0.0053938	Gj6P225T14
MSTRG_10027_1	Gj6P228T6_mRNA1	0.98294	1.10589e-08	7.0248e-05	Gj6P228T6
MSTRG_10027_1	Gj6P29T3_mRNA1	0.914562	3.10194e-05	0.00894407	Gj6P29T3
MSTRG_10027_1	Gj6P309T8_mRNA1	0.930619	1.12603e-05	0.00543422	Gj6P309T8
MSTRG_10027_1	Gj6P317T0_mRNA1	0.908709	4.27701e-05	0.0104197	Gj6P317T0
MSTRG_10027_1	Gj6P317T8_mRNA1	0.970409	1.70022e-07	0.000465157	Gj6P317T8
MSTRG_10027_1	Gj6P320T7_mRNA1	0.997018	1.84652e-12	7.37624e-08	Gj6P320T7
MSTRG_10027_1	Gj6P335T8_mRNA1	0.953891	1.51881e-06	0.00184351	Gj6P335T8
MSTRG_10027_1	Gj6P33T14_mRNA1	0.946989	3.01516e-06	0.00275323	Gj6P33T14
MSTRG_10027_1	Gj6P39T20_mRNA1	0.915442	2.94993e-05	0.00873305	Gj6P39T20
MSTRG_10027_1	Gj6P3T3_mRNA1	0.97068	1.62465e-07	0.000450753	Gj6P3T3
MSTRG_10027_1	Gj6P48T3_mRNA1	0.981734	1.55305e-08	8.96775e-05	MSTRG_4156
MSTRG_10027_1	Gj6P61T1_mRNA1	0.973657	9.55909e-08	0.000314872	Gj6P61T1
MSTRG_10027_1	Gj6P9T5_mRNA1	0.900476	6.49302e-05	0.0126035	Gj6P9T5
MSTRG_10027_1	Gj6X139T5_mRNA1	0.969597	1.94395e-07	0.000509577	Gj6X139T5
MSTRG_10027_1	Gj6X179T12_mRNA1	0.961542	6.21104e-07	0.00106762	Gj6X179T12
MSTRG_10027_1	Gj6X18T39_mRNA1	0.955405	1.28865e-06	0.00167733	Gj6X18T39
MSTRG_10027_1	Gj6X224T3_mRNA1	0.979081	3.04583e-08	0.000141967	Gj6X224T3
MSTRG_10027_1	Gj6X318T50_mRNA1	0.986756	3.13809e-09	2.88597e-05	Gj6X318T50
MSTRG_10027_1	Gj6X324T29_mRNA1	0.979081	3.04583e-08	0.000141967	Gj6X324T29
MSTRG_10027_1	Gj6X341T95_mRNA1	0.979699	2.62446e-08	0.000129171	Gj6X341T95
MSTRG_10027_1	Gj6X49T17_mRNA1	0.996847	2.43983e-12	9.34858e-08	Gj6X49T17
MSTRG_10027_1	Gj7A18T49_mRNA1	0.975128	7.18928e-08	0.000259526	Gj7A18T49
MSTRG_10027_1	Gj7A212T33_mRNA1	0.993281	1.06666e-10	2.08651e-06	Gj7A212T33
MSTRG_10027_1	Gj7A217T20_mRNA1	0.951604	1.9273e-06	0.00212437	Gj7A217T20
MSTRG_10027_1	Gj7A296T61_mRNA1	0.943686	4.05631e-06	0.00322923	MSTRG_4643
MSTRG_10027_1	Gj7A2T47_mRNA1	0.939255	5.87912e-06	0.00390135	MSTRG_4479
MSTRG_10027_1	Gj7A320T21_mRNA1	0.911216	3.73726e-05	0.00978562	Gj7A320T21
MSTRG_10027_1	Gj7A326T42_mRNA1	0.976724	5.17477e-08	0.00020578	Gj7A326T42
MSTRG_10027_1	Gj7A328T39_mRNA1	0.955707	1.24617e-06	0.00164404	Gj7A328T39
MSTRG_10027_1	Gj7A348T63_mRNA1	0.915736	2.90047e-05	0.00866289	Gj7A348T63
MSTRG_10027_1	Gj7A351T66_mRNA1	0.931284	1.07435e-05	0.00530839	Gj7A351T66
MSTRG_10027_1	Gj7A355T76_mRNA1	0.983007	1.08462e-08	6.92299e-05	Gj7A355T76
MSTRG_10027_1	Gj7A365T94_mRNA1	0.939932	5.56511e-06	0.0037958	Gj7A365T94
MSTRG_10027_1	Gj7A367T85_mRNA1	0.93991	5.57513e-06	0.00379926	Gj7A367T85
MSTRG_10027_1	Gj7A368T93_mRNA1	0.907275	4.61214e-05	0.0107826	Gj7A368T93
MSTRG_10027_1	Gj7A369T84_mRNA1	0.981615	1.60386e-08	9.18394e-05	Gj7A369T84
MSTRG_10027_1	Gj7A378T74_mRNA1	0.945392	3.48797e-06	0.00298426	Gj7A378T74
MSTRG_10027_1	Gj7A385T156_mRNA1	0.907476	4.5641e-05	0.0107317	Gj7A385T156
MSTRG_10027_1	Gj7A386T87_mRNA1	0.991481	3.48299e-10	5.27949e-06	Gj7A386T87
MSTRG_10027_1	Gj7A38T61_mRNA1	0.940539	5.29537e-06	0.00370033	Gj7A38T61
MSTRG_10027_1	Gj7A399T90_mRNA1	0.98046	2.1713e-08	0.00011387	Gj7A399T90
MSTRG_10027_1	Gj7A406T124_mRNA1	0.914796	3.06095e-05	0.00888614	Gj7A406T124
MSTRG_10027_1	Gj7A58T32_mRNA1	0.936008	7.58553e-06	0.00445498	Gj7A58T32
MSTRG_10027_1	Gj7E317T1_mRNA1	0.985408	5.08375e-09	4.02174e-05	Gj7E317T1
MSTRG_10027_1	Gj7E327T1_mRNA1	0.909333	4.13724e-05	0.0102616	Gj7E327T1
MSTRG_10027_1	Gj7E45T1_mRNA1	0.978118	3.80859e-08	0.000165755	Gj7E45T1
MSTRG_10027_1	Gj7P255T7_mRNA1	0.986918	2.95165e-09	2.75745e-05	Gj7P255T7
MSTRG_10027_1	Gj7P329T7_mRNA1	0.953995	1.5021e-06	0.00183219	Gj7P329T7
MSTRG_10027_1	Gj7P348T7_mRNA1	0.951164	2.01505e-06	0.00218153	Gj7P348T7
MSTRG_10027_1	Gj7P354T15_mRNA1	0.979081	3.04583e-08	0.000141967	Gj7P354T15
MSTRG_10027_1	Gj7P367T17_mRNA1	0.949461	2.38468e-06	0.00241037	Gj7P367T17
MSTRG_10027_1	Gj7P370T11_mRNA1	0.914181	3.16959e-05	0.0090384	Gj7P370T11
MSTRG_10027_1	Gj7P37T9_mRNA1	0.945978	3.30828e-06	0.00289903	Gj7P37T9
MSTRG_10027_1	Gj7P384T7_mRNA1	0.983584	9.1342e-09	6.1498e-05	Gj7P384T7
MSTRG_10027_1	Gj7P385T24_mRNA1	0.971222	1.48107e-07	0.000422414	Gj7P385T24
MSTRG_10027_1	Gj7P410T15_mRNA1	0.902285	5.94255e-05	0.0120996	MSTRG_4889
MSTRG_10027_1	Gj7P41T4_mRNA1	0.955568	1.26566e-06	0.00165943	Gj7P41T4
MSTRG_10027_1	Gj7P45T9_mRNA1	0.981766	1.53959e-08	8.91443e-05	MSTRG_4518
MSTRG_10027_1	Gj7P8T4_mRNA1	0.964517	4.17318e-07	0.000832939	Gj7P8T4
MSTRG_10027_1	Gj7X252T4_mRNA1	0.955313	1.30176e-06	0.00168742	MSTRG_4613
MSTRG_10027_1	Gj7X317T47_mRNA1	0.957409	1.02742e-06	0.00146041	Gj7X317T47
MSTRG_10027_1	Gj7X327T13_mRNA1	0.979081	3.04583e-08	0.000141967	Gj7X327T13
MSTRG_10027_1	Gj7X331T65_mRNA1	0.916141	2.83338e-05	0.00856571	Gj7X331T65
MSTRG_10027_1	Gj7X335T57_mRNA1	0.92477	1.67097e-05	0.00661125	Gj7X335T57
MSTRG_10027_1	Gj7X343T14_mRNA1	0.902452	5.89389e-05	0.0120532	Gj7X343T14
MSTRG_10027_1	Gj7X350T58_mRNA1	0.977453	4.41844e-08	0.00018432	Gj7X350T58
MSTRG_10027_1	Gj7X351T26_mRNA1	0.972124	1.26505e-07	0.000378199	Gj7X351T26
MSTRG_10027_1	Gj7X352T54_mRNA1	0.978889	3.18776e-08	0.00014644	Gj7X352T54
MSTRG_10027_1	Gj7X353T46_mRNA1	0.995025	2.3807e-11	6.20678e-07	Gj7X353T46
MSTRG_10027_1	Gj7X355T23_mRNA1	0.941154	5.03229e-06	0.0036066	Gj7X355T23
MSTRG_10027_1	Gj7X360T73_mRNA1	0.970648	1.63334e-07	0.000452419	Gj7X360T73
MSTRG_10027_1	Gj7X361T14_mRNA1	0.90085	6.37616e-05	0.0125002	Gj7X361T14
MSTRG_10027_1	Gj7X374T85_mRNA1	0.96399	4.48848e-07	0.000871564	Gj7X374T85
MSTRG_10027_1	Gj7X380T34_mRNA1	0.901856	6.06971e-05	0.0122196	Gj7X380T34
MSTRG_10027_1	Gj7X384T53_mRNA1	0.997304	1.11622e-12	4.88262e-08	Gj7X384T53
MSTRG_10027_1	Gj7X385T42_mRNA1	0.911992	3.58147e-05	0.00958557	Gj7X385T42
MSTRG_10027_1	Gj7X40T12_mRNA1	0.991558	3.32907e-10	5.105e-06	Gj7X40T12
MSTRG_10027_1	Gj7X53T13_mRNA1	0.964573	4.14093e-07	0.000828935	Gj7X53T13
MSTRG_10027_1	Gj8A0T45_mRNA1	0.972148	1.25971e-07	0.000377182	Gj8A0T45
MSTRG_10027_1	Gj8A0T51_mRNA1	0.9043	5.3735e-05	0.0115491	Gj8A0T51
MSTRG_10027_1	Gj8A11T59_mRNA1	0.911202	3.74018e-05	0.00978929	Gj8A11T59
MSTRG_10027_1	Gj8A11T64_mRNA1	0.995898	9.0794e-12	2.74053e-07	Gj8A11T64
MSTRG_10027_1	Gj8A15T61_mRNA1	0.975194	7.09616e-08	0.000257249	Gj8A15T61
MSTRG_10027_1	Gj8A244T62_mRNA1	0.994868	2.78075e-11	7.01963e-07	MSTRG_5114
MSTRG_10027_1	Gj8A284T17_mRNA1	0.945975	3.30903e-06	0.0028994	Gj8A284T17
MSTRG_10027_1	Gj8A286T33_mRNA1	0.926189	1.52291e-05	0.00630821	Gj8A286T33
MSTRG_10027_1	Gj8A287T46_mRNA1	0.998032	2.3137e-13	1.16938e-08	Gj8A287T46
MSTRG_10027_1	Gj8A342T100_mRNA1	0.98087	1.95426e-08	0.000105896	Gj8A342T100
MSTRG_10027_1	Gj8A342T87_mRNA1	0.941052	5.07516e-06	0.00362185	Gj8A342T87
MSTRG_10027_1	Gj8A343T92_mRNA1	0.981669	1.58076e-08	9.08562e-05	Gj8A343T92
MSTRG_10027_1	Gj8A345T68_mRNA1	0.977176	4.69482e-08	0.000192235	Gj8A345T68
MSTRG_10027_1	Gj8A347T73_mRNA1	0.904933	5.20369e-05	0.0113853	Gj8A347T73
MSTRG_10027_1	Gj8A347T74_mRNA1	0.909471	4.10693e-05	0.0102273	Gj8A347T74
MSTRG_10027_1	Gj8A361T62_mRNA1	0.923325	1.83312e-05	0.00692537	MSTRG_5206
MSTRG_10027_1	Gj8A362T70_mRNA1	0.944045	3.9312e-06	0.00317821	Gj8A362T70
MSTRG_10027_1	Gj8A364T59_mRNA1	0.939322	5.84756e-06	0.00389101	Gj8A364T59
MSTRG_10027_1	Gj8A371T74_mRNA1	0.980298	2.26201e-08	0.000117053	Gj8A371T74
MSTRG_10027_1	Gj8A376T69_mRNA1	0.906048	4.91517e-05	0.0110975	Gj8A376T69
MSTRG_10027_1	Gj8A3T69_mRNA1	0.938371	6.31004e-06	0.00404377	Gj8A3T69
MSTRG_10027_1	Gj8A400T126_mRNA1	0.988686	1.43263e-09	1.57773e-05	MSTRG_5363
MSTRG_10027_1	Gj8A63T42_mRNA1	0.975386	6.82765e-08	0.000250573	MSTRG_4990
MSTRG_10027_1	Gj8A66T104_mRNA1	0.980856	1.96094e-08	0.000106149	Gj8A66T104
MSTRG_10027_1	Gj8A66T107_mRNA1	0.906129	4.89458e-05	0.0110766	Gj8A66T107
MSTRG_10027_1	Gj8A66T112_mRNA1	0.952991	1.67045e-06	0.00194998	Gj8A66T112
MSTRG_10027_1	Gj8A72T37_mRNA1	0.90368	5.54366e-05	0.0117157	Gj8A72T37
MSTRG_10027_1	Gj8A76T63_mRNA1	0.902296	5.93941e-05	0.0120966	MSTRG_5029
MSTRG_10027_1	Gj8A7T89_mRNA1	0.997821	3.85691e-13	1.86766e-08	Gj8A7T89
MSTRG_10027_1	Gj8A88T86_mRNA1	0.979081	3.04583e-08	0.000141967	Gj8A88T86
MSTRG_10027_1	Gj8A8T78_mRNA1	0.98614	3.93529e-09	3.39318e-05	Gj8A8T78
MSTRG_10027_1	Gj8A90T76_mRNA1	0.917489	2.61894e-05	0.00824004	MSTRG_5038
MSTRG_10027_1	Gj8A91T20_mRNA1	0.901129	6.28994e-05	0.0124228	Gj8A91T20
MSTRG_10027_1	Gj8P26T7_mRNA1	0.936001	7.58972e-06	0.00445625	Gj8P26T7
MSTRG_10027_1	Gj8P295T3_mRNA1	0.965781	3.48873e-07	0.000744587	Gj8P295T3
MSTRG_10027_1	Gj8P299T1_mRNA1	0.967573	2.67392e-07	0.000627639	Gj8P299T1
MSTRG_10027_1	Gj8P30T3_mRNA1	0.95472	1.38912e-06	0.00175267	Gj8P30T3
MSTRG_10027_1	Gj8P342T16_mRNA1	0.953111	1.64954e-06	0.00193531	Gj8P342T16
MSTRG_10027_1	Gj8P344T3_mRNA1	0.906301	4.85135e-05	0.0110325	Gj8P344T3
MSTRG_10027_1	Gj8P345T8_mRNA1	0.925198	1.62508e-05	0.00651688	MSTRG_5186
MSTRG_10027_1	Gj8P34T4_mRNA1	0.911932	3.59331e-05	0.00960109	MSTRG_4952
MSTRG_10027_1	Gj8P35T10_mRNA1	0.965625	3.5678e-07	0.000755262	Gj8P35T10
MSTRG_10027_1	Gj8P364T8_mRNA1	0.941414	4.924e-06	0.00356749	Gj8P364T8
MSTRG_10027_1	Gj8P381T9_mRNA1	0.979049	3.06967e-08	0.000142691	Gj8P381T9
MSTRG_10027_1	Gj8P390T12_mRNA1	0.942849	4.36065e-06	0.00334945	Gj8P390T12
MSTRG_10027_1	Gj8P46T2_mRNA1	0.975176	7.12186e-08	0.000257879	Gj8P46T2
MSTRG_10027_1	Gj8P52T7_mRNA1	0.910946	3.79271e-05	0.00985475	Gj8P52T7
MSTRG_10027_1	Gj8P56T8_mRNA1	0.972117	1.26667e-07	0.000378505	MSTRG_4984
MSTRG_10027_1	Gj8P60T12_mRNA1	0.996675	3.18212e-12	1.16077e-07	Gj8P60T12
MSTRG_10027_1	Gj8P60T15_mRNA1	0.917522	2.61386e-05	0.00823241	Gj8P60T15
MSTRG_10027_1	Gj8P64T9_mRNA1	0.992771	1.5362e-10	2.81343e-06	MSTRG_4993
MSTRG_10027_1	Gj8P66T16_mRNA1	0.935173	8.08222e-06	0.00460011	Gj8P66T16
MSTRG_10027_1	Gj8P6T3_mRNA1	0.994156	5.31659e-11	1.19527e-06	MSTRG_4903
MSTRG_10027_1	Gj8P96T4_mRNA1	0.977041	4.83411e-08	0.00019618	Gj8P96T4
MSTRG_10027_1	Gj8X114T17_mRNA1	0.963086	5.07318e-07	0.000939039	Gj8X114T17
MSTRG_10027_1	Gj8X122T5_mRNA1	0.939416	5.80353e-06	0.00387647	Gj8X122T5
MSTRG_10027_1	Gj8X141T5_mRNA1	0.95322	1.63071e-06	0.00192198	Gj8X141T5
MSTRG_10027_1	Gj8X206T4_mRNA1	0.94162	4.83976e-06	0.00353647	Gj8X206T4
MSTRG_10027_1	Gj8X303T12_mRNA1	0.970094	1.79169e-07	0.000482134	Gj8X303T12
MSTRG_10027_1	Gj8X317T40_mRNA1	0.907076	4.6603e-05	0.0108335	Gj8X317T40
MSTRG_10027_1	Gj8X341T20_mRNA1	0.946719	3.09142e-06	0.00279154	Gj8X341T20
MSTRG_10027_1	Gj8X356T33_mRNA1	0.966311	3.22957e-07	0.000708493	Gj8X356T33
MSTRG_10027_1	Gj8X376T38_mRNA1	0.911233	3.73379e-05	0.00978126	Gj8X376T38
MSTRG_10027_1	Gj8X377T18_mRNA1	0.95106	2.03606e-06	0.00219526	MSTRG_5262
MSTRG_10027_1	Gj8X378T23_mRNA1	0.953945	1.51009e-06	0.00183762	Gj8X378T23
MSTRG_10027_1	Gj8X381T66_mRNA1	0.960477	7.10657e-07	0.00116129	Gj8X381T66
MSTRG_10027_1	Gj8X381T86_mRNA1	0.901225	6.26062e-05	0.0123962	Gj8X381T86
MSTRG_10027_1	Gj8X388T73_mRNA1	0.929708	1.20009e-05	0.00561665	Gj8X388T73
MSTRG_10027_1	Gj8X389T37_mRNA1	0.991382	3.6899e-10	5.50782e-06	Gj8X389T37
MSTRG_10027_1	Gj8X393T48_mRNA1	0.979081	3.04583e-08	0.000141967	Gj8X393T48
MSTRG_10027_1	Gj8X395T85_mRNA1	0.95993	7.60499e-07	0.00121339	Gj8X395T85
MSTRG_10027_1	Gj8X398T14_mRNA1	0.959928	7.60754e-07	0.00121365	Gj8X398T14
MSTRG_10027_1	Gj9A1009T100_mRNA1	0.927333	1.41123e-05	0.0060861	Gj9A1009T100
MSTRG_10027_1	Gj9A1012T98_mRNA1	0.97668	5.22328e-08	0.000207159	MSTRG_10206
MSTRG_10027_1	Gj9A1013T79_mRNA1	0.911211	3.73836e-05	0.00978701	Gj9A1013T79
MSTRG_10027_1	Gj9A1024T90_mRNA1	0.973853	9.21102e-08	0.000306931	Gj9A1024T90
MSTRG_10027_1	Gj9A1030T85_mRNA1	0.922442	1.93822e-05	0.00712144	Gj9A1030T85
MSTRG_10027_1	Gj9A1032T117_mRNA1	0.935598	7.82597e-06	0.00452638	Gj9A1032T117
MSTRG_10027_1	Gj9A1035T102_mRNA1	0.986085	4.01404e-09	3.43987e-05	Gj9A1035T102
MSTRG_10027_1	Gj9A1035T116_mRNA1	0.992922	1.38234e-10	2.58124e-06	Gj9A1035T116
MSTRG_10027_1	Gj9A1038T73_mRNA1	0.916072	2.84471e-05	0.0085823	Gj9A1038T73
MSTRG_10027_1	Gj9A1044T57_mRNA1	0.956228	1.17565e-06	0.00158702	Gj9A1044T57
MSTRG_10027_1	Gj9A1045T120_mRNA1	0.973359	1.01077e-07	0.000327024	MSTRG_10421
MSTRG_10027_1	Gj9A104T123_mRNA1	0.992936	1.36898e-10	2.56094e-06	Gj9A104T123
MSTRG_10027_1	Gj9A104T128_mRNA1	0.916513	2.77293e-05	0.00847612	Gj9A104T128
MSTRG_10027_1	Gj9A1052T109_mRNA1	0.936427	7.34574e-06	0.00438156	MSTRG_10474
MSTRG_10027_1	Gj9A1062T111_mRNA1	0.950892	2.07081e-06	0.00221772	Gj9A1062T111
MSTRG_10027_1	Gj9A1065T81_mRNA1	0.914447	3.12227e-05	0.00897257	Gj9A1065T81
MSTRG_10027_1	Gj9A1068T87_mRNA1	0.957625	1.00205e-06	0.0014383	Gj9A1068T87
MSTRG_10027_1	Gj9A106T72_mRNA1	0.910079	3.97502e-05	0.0100747	MSTRG_6100
MSTRG_10027_1	Gj9A1076T83_mRNA1	0.971063	1.52204e-07	0.000430661	MSTRG_10654
MSTRG_10027_1	Gj9A1084T56_mRNA1	0.956059	1.19814e-06	0.00160547	Gj9A1084T56
MSTRG_10027_1	Gj9A1085T82_mRNA1	0.915804	2.88911e-05	0.00864659	Gj9A1085T82
MSTRG_10027_1	Gj9A1092T69_mRNA1	0.997269	1.19149e-12	5.16134e-08	Gj9A1092T69
MSTRG_10027_1	Gj9A1093T95_mRNA1	0.955777	1.23658e-06	0.0016364	Gj9A1093T95
MSTRG_10027_1	Gj9A1096T101_mRNA1	0.918063	2.53167e-05	0.0081077	Gj9A1096T101
MSTRG_10027_1	Gj9A152T89_mRNA1	0.934231	8.67263e-06	0.00476138	Gj9A152T89
MSTRG_10027_1	Gj9A162T119_mRNA1	0.976239	5.73237e-08	0.000221545	Gj9A162T119
MSTRG_10027_1	Gj9A171T83_mRNA1	0.947275	2.93604e-06	0.00271258	Gj9A171T83
MSTRG_10027_1	Gj9A180T125_mRNA1	0.964355	4.26847e-07	0.00084463	Gj9A180T125
MSTRG_10027_1	Gj9A188T129_mRNA1	0.977632	4.247e-08	0.000179258	MSTRG_6755
MSTRG_10027_1	Gj9A198T89_mRNA1	0.9742	8.62135e-08	0.000293049	Gj9A198T89
MSTRG_10027_1	Gj9A200T89_mRNA1	0.986709	3.19396e-09	2.92371e-05	MSTRG_6855
MSTRG_10027_1	Gj9A200T90_mRNA1	0.965264	3.7568e-07	0.000780091	MSTRG_6856
MSTRG_10027_1	Gj9A209T67_mRNA1	0.972132	1.26337e-07	0.000377879	MSTRG_6920
MSTRG_10027_1	Gj9A210T74_mRNA1	0.977625	4.2536e-08	0.000179455	Gj9A210T74
MSTRG_10027_1	Gj9A217T114_mRNA1	0.930795	1.11219e-05	0.00539971	MSTRG_6985
MSTRG_10027_1	Gj9A219T120_mRNA1	0.935095	8.12986e-06	0.00461357	Gj9A219T120
MSTRG_10027_1	Gj9A225T97_mRNA1	0.955219	1.31536e-06	0.0016978	Gj9A225T97
MSTRG_10027_1	Gj9A229T71_mRNA1	0.939318	5.84927e-06	0.00389157	Gj9A229T71
MSTRG_10027_1	Gj9A230T79_mRNA1	0.990098	7.37451e-10	9.39117e-06	MSTRG_7071
MSTRG_10027_1	Gj9A234T93_mRNA1	0.993415	9.645e-11	1.93306e-06	Gj9A234T93
MSTRG_10027_1	Gj9A255T131_mRNA1	0.986286	3.73365e-09	3.27097e-05	MSTRG_7195
MSTRG_10027_1	Gj9A26T94_mRNA1	0.991183	4.13463e-10	5.97574e-06	Gj9A26T94
MSTRG_10027_1	Gj9A280T128_mRNA1	0.95802	9.56805e-07	0.00139852	Gj9A280T128
MSTRG_10027_1	Gj9A280T130_mRNA1	0.986171	3.89158e-09	3.36702e-05	Gj9A280T130
MSTRG_10027_1	Gj9A280T134_mRNA1	0.987614	2.24898e-09	2.23654e-05	MSTRG_7324
MSTRG_10027_1	Gj9A283T113_mRNA1	0.989706	8.94757e-10	1.0831e-05	Gj9A283T113
MSTRG_10027_1	Gj9A283T114_mRNA1	0.915141	3.00132e-05	0.00880466	Gj9A283T114
MSTRG_10027_1	Gj9A286T43_mRNA1	0.967526	2.69322e-07	0.000630458	Gj9A286T43
MSTRG_10027_1	Gj9A289T67_mRNA1	0.943396	4.15964e-06	0.00327072	Gj9A289T67
MSTRG_10027_1	Gj9A294T88_mRNA1	0.904404	5.34512e-05	0.0115221	Gj9A294T88
MSTRG_10027_1	Gj9A296T99_mRNA1	0.942829	4.36824e-06	0.00335255	Gj9A296T99
MSTRG_10027_1	Gj9A297T101_mRNA1	0.916003	2.8561e-05	0.00859888	Gj9A297T101
MSTRG_10027_1	Gj9A306T109_mRNA1	0.925265	1.6181e-05	0.00650268	MSTRG_7403
MSTRG_10027_1	Gj9A318T25_mRNA1	0.902115	5.9928e-05	0.0121471	Gj9A318T25
MSTRG_10027_1	Gj9A31T98_mRNA1	0.929864	1.18716e-05	0.00558533	MSTRG_5585
MSTRG_10027_1	Gj9A331T81_mRNA1	0.916838	2.72089e-05	0.00839737	Gj9A331T81
MSTRG_10027_1	Gj9A367T35_mRNA1	0.941594	4.85042e-06	0.00354043	Gj9A367T35
MSTRG_10027_1	Gj9A376T55_mRNA1	0.906084	4.90598e-05	0.0110882	Gj9A376T55
MSTRG_10027_1	Gj9A376T56_mRNA1	0.93082	1.11021e-05	0.00539474	Gj9A376T56
MSTRG_10027_1	Gj9A406T27_mRNA1	0.965665	3.54763e-07	0.000752555	Gj9A406T27
MSTRG_10027_1	Gj9A41T76_mRNA1	0.984191	7.57324e-09	5.38925e-05	Gj9A41T76
MSTRG_10027_1	Gj9A47T78_mRNA1	0.979314	2.88107e-08	0.000137128	Gj9A47T78
MSTRG_10027_1	Gj9A4T92_mRNA1	0.989432	1.01984e-09	1.20124e-05	MSTRG_5395
MSTRG_10027_1	Gj9A540T106_mRNA1	0.991154	4.20207e-10	6.04412e-06	Gj9A540T106
MSTRG_10027_1	Gj9A553T73_mRNA1	0.93665	7.22036e-06	0.00434246	Gj9A553T73
MSTRG_10027_1	Gj9A564T101_mRNA1	0.91436	3.13779e-05	0.00899422	Gj9A564T101
MSTRG_10027_1	Gj9A590T78_mRNA1	0.909934	4.0062e-05	0.0101113	MSTRG_7850
MSTRG_10027_1	Gj9A598T61_mRNA1	0.955042	1.34111e-06	0.00171722	Gj9A598T61
MSTRG_10027_1	Gj9A5T97_mRNA1	0.91318	3.35315e-05	0.00928776	Gj9A5T97
MSTRG_10027_1	Gj9A600T107_mRNA1	0.978277	3.67302e-08	0.00016167	MSTRG_7879
MSTRG_10027_1	Gj9A62T91_mRNA1	0.954591	1.40872e-06	0.00176686	Gj9A62T91
MSTRG_10027_1	Gj9A669T89_mRNA1	0.920236	2.22157e-05	0.0076163	Gj9A669T89
MSTRG_10027_1	Gj9A673T132_mRNA1	0.967536	2.68935e-07	0.000629894	Gj9A673T132
MSTRG_10027_1	Gj9A682T143_mRNA1	0.983875	8.35681e-09	5.78156e-05	Gj9A682T143
MSTRG_10027_1	Gj9A687T130_mRNA1	0.977346	4.5235e-08	0.000187363	Gj9A687T130
MSTRG_10027_1	Gj9A693T116_mRNA1	0.918402	2.48108e-05	0.00803094	Gj9A693T116
MSTRG_10027_1	Gj9A702T133_mRNA1	0.947115	2.98018e-06	0.00273538	Gj9A702T133
MSTRG_10027_1	Gj9A718T120_mRNA1	0.926038	1.53813e-05	0.00633796	Gj9A718T120
MSTRG_10027_1	Gj9A71T111_mRNA1	0.933921	8.87417e-06	0.00481429	MSTRG_5863
MSTRG_10027_1	Gj9A71T112_mRNA1	0.905723	4.99793e-05	0.0111804	Gj9A71T112
MSTRG_10027_1	Gj9A733T77_mRNA1	0.925904	1.55176e-05	0.00636619	Gj9A733T77
MSTRG_10027_1	Gj9A735T81_mRNA1	0.933323	9.27386e-06	0.00492291	Gj9A735T81
MSTRG_10027_1	Gj9A740T100_mRNA1	0.9006	6.45419e-05	0.0125693	Gj9A740T100
MSTRG_10027_1	Gj9A740T91_mRNA1	0.979081	3.04583e-08	0.000141967	MSTRG_8680
MSTRG_10027_1	Gj9A740T92_mRNA1	0.970878	1.57098e-07	0.000440344	Gj9A740T92
MSTRG_10027_1	Gj9A741T92_mRNA1	0.961247	6.44976e-07	0.00109353	Gj9A741T92
MSTRG_10027_1	Gj9A741T97_mRNA1	0.965069	3.86214e-07	0.000793521	Gj9A741T97
MSTRG_10027_1	Gj9A74T192_mRNA1	0.977976	3.93275e-08	0.000169664	Gj9A74T192
MSTRG_10027_1	Gj9A753T58_mRNA1	0.960227	7.3314e-07	0.00118508	Gj9A753T58
MSTRG_10027_1	Gj9A754T74_mRNA1	0.919495	2.32366e-05	0.0077845	Gj9A754T74
MSTRG_10027_1	Gj9A757T82_mRNA1	0.98347	9.4528e-09	6.29507e-05	Gj9A757T82
MSTRG_10027_1	Gj9A758T73_mRNA1	0.996415	4.63474e-12	1.57871e-07	MSTRG_8733
MSTRG_10027_1	Gj9A771T116_mRNA1	0.993868	6.75653e-11	1.45529e-06	Gj9A771T116
MSTRG_10027_1	Gj9A775T74_mRNA1	0.993942	6.35954e-11	1.38399e-06	Gj9A775T74
MSTRG_10027_1	Gj9A776T86_mRNA1	0.955971	1.2101e-06	0.00161517	MSTRG_8823
MSTRG_10027_1	Gj9A779T68_mRNA1	0.9908	5.1118e-10	7.07082e-06	Gj9A779T68
MSTRG_10027_1	Gj9A780T93_mRNA1	0.948663	2.57556e-06	0.0025193	MSTRG_8838
MSTRG_10027_1	Gj9A785T59_mRNA1	0.930671	1.12192e-05	0.00542402	MSTRG_8873
MSTRG_10027_1	Gj9A790T79_mRNA1	0.953977	1.5049e-06	0.0018341	Gj9A790T79
MSTRG_10027_1	Gj9A794T80_mRNA1	0.991767	2.9385e-10	4.64342e-06	Gj9A794T80
MSTRG_10027_1	Gj9A79T91_mRNA1	0.907781	4.49172e-05	0.0106543	Gj9A79T91
MSTRG_10027_1	Gj9A805T75_mRNA1	0.985776	4.4773e-09	3.70333e-05	MSTRG_8967
MSTRG_10027_1	Gj9A815T115_mRNA1	0.989862	8.29145e-10	1.02481e-05	Gj9A815T115
MSTRG_10027_1	Gj9A820T120_mRNA1	0.925446	1.59904e-05	0.00646405	Gj9A820T120
MSTRG_10027_1	Gj9A826T102_mRNA1	0.982523	1.2472e-08	7.67933e-05	MSTRG_9104
MSTRG_10027_1	Gj9A838T50_mRNA1	0.957356	1.03376e-06	0.00146596	Gj9A838T50
MSTRG_10027_1	Gj9A843T115_mRNA1	0.920403	2.19907e-05	0.00757937	Gj9A843T115
MSTRG_10027_1	Gj9A843T123_mRNA1	0.979357	2.85157e-08	0.00013624	MSTRG_9195
MSTRG_10027_1	Gj9A848T95_mRNA1	0.907576	4.54017e-05	0.0107063	MSTRG_9229
MSTRG_10027_1	Gj9A856T116_mRNA1	0.988562	1.51237e-09	1.64637e-05	Gj9A856T116
MSTRG_10027_1	Gj9A868T104_mRNA1	0.909938	4.00534e-05	0.0101103	Gj9A868T104
MSTRG_10027_1	Gj9A869T120_mRNA1	0.992156	2.30853e-10	3.8596e-06	Gj9A869T120
MSTRG_10027_1	Gj9A879T101_mRNA1	0.944116	3.90657e-06	0.003168	Gj9A879T101
MSTRG_10027_1	Gj9A879T95_mRNA1	0.918606	2.45111e-05	0.00798522	Gj9A879T95
MSTRG_10027_1	Gj9A882T105_mRNA1	0.937123	6.9606e-06	0.0042608	Gj9A882T105
MSTRG_10027_1	Gj9A890T74_mRNA1	0.963236	4.97253e-07	0.000927877	Gj9A890T74
MSTRG_10027_1	Gj9A891T99_mRNA1	0.971395	1.43754e-07	0.000413507	Gj9A891T99
MSTRG_10027_1	Gj9A908T52_mRNA1	0.910064	3.97824e-05	0.0100785	Gj9A908T52
MSTRG_10027_1	Gj9A908T62_mRNA1	0.995018	2.39586e-11	6.23836e-07	Gj9A908T62
MSTRG_10027_1	Gj9A909T129_mRNA1	0.942699	4.41682e-06	0.00337235	Gj9A909T129
MSTRG_10027_1	Gj9A913T100_mRNA1	0.928619	1.29358e-05	0.00583399	Gj9A913T100
MSTRG_10027_1	Gj9A918T78_mRNA1	0.922764	1.89941e-05	0.00704909	Gj9A918T78
MSTRG_10027_1	Gj9A918T79_mRNA1	0.991456	3.5339e-10	5.33632e-06	Gj9A918T79
MSTRG_10027_1	Gj9A92T116_mRNA1	0.948383	2.64536e-06	0.00255759	Gj9A92T116
MSTRG_10027_1	Gj9A92T121_mRNA1	0.906264	4.86071e-05	0.0110421	MSTRG_6020
MSTRG_10027_1	Gj9A933T124_mRNA1	0.980873	1.95233e-08	0.000105823	Gj9A933T124
MSTRG_10027_1	Gj9A943T81_mRNA1	0.951467	1.95433e-06	0.00214215	Gj9A943T81
MSTRG_10027_1	Gj9A943T82_mRNA1	0.940395	5.3583e-06	0.00372302	Gj9A943T82
MSTRG_10027_1	Gj9A948T54_mRNA1	0.991952	2.62355e-10	4.25529e-06	Gj9A948T54
MSTRG_10027_1	Gj9A952T48_mRNA1	0.926138	1.52802e-05	0.00631823	MSTRG_9864
MSTRG_10027_1	Gj9A954T93_mRNA1	0.979081	3.04583e-08	0.000141967	Gj9A954T93
MSTRG_10027_1	Gj9A956T43_mRNA1	0.95861	8.92363e-07	0.00134019	Gj9A956T43
MSTRG_10027_1	Gj9A957T107_mRNA1	0.906869	4.71067e-05	0.0108863	Gj9A957T107
MSTRG_10027_1	Gj9A957T92_mRNA1	0.923664	1.79406e-05	0.00685232	Gj9A957T92
MSTRG_10027_1	Gj9A958T167_mRNA1	0.971928	1.30976e-07	0.000387251	Gj9A958T167
MSTRG_10027_1	Gj9A959T68_mRNA1	0.934027	8.80503e-06	0.00479607	MSTRG_9911
MSTRG_10027_1	Gj9A968T99_mRNA1	0.981362	1.71683e-08	9.65423e-05	MSTRG_9980
MSTRG_10027_1	Gj9A971T115_mRNA1	0.990132	7.24896e-10	9.26978e-06	Gj9A971T115
MSTRG_10027_1	Gj9A972T170_mRNA1	0.909116	4.18549e-05	0.0103163	MSTRG_10000
MSTRG_10027_1	Gj9A979T104_mRNA1	0.979081	3.04583e-08	0.000141967	Gj9A979T104
MSTRG_10027_1	Gj9A986T77_mRNA1	0.918839	2.41725e-05	0.00793285	MSTRG_10090
MSTRG_10027_1	Gj9A993T95_mRNA1	0.98036	2.22667e-08	0.000115823	Gj9A993T95
MSTRG_10027_1	Gj9A993T99_mRNA1	0.932266	1.00145e-05	0.00512408	MSTRG_10126
MSTRG_10027_1	Gj9A9T94_mRNA1	0.963545	4.76917e-07	0.000904764	Gj9A9T94
MSTRG_10027_1	Gj9E1043T8_mRNA1	0.96321	4.98964e-07	0.000929787	Gj9E1043T8
MSTRG_10027_1	Gj9E619T6_mRNA1	0.968751	2.22677e-07	0.000557763	MSTRG_7947
MSTRG_10027_1	Gj9E715T1_mRNA1	0.958275	9.28516e-07	0.00137289	MSTRG_8593
MSTRG_10027_1	Gj9E776T0_mRNA1	0.954745	1.38532e-06	0.0017499	MSTRG_8822
MSTRG_10027_1	Gj9P1001T6_mRNA1	0.964006	4.47863e-07	0.00087037	Gj9P1001T6
MSTRG_10027_1	Gj9P1007T9_mRNA1	0.969812	1.87683e-07	0.000497653	Gj9P1007T9
MSTRG_10027_1	Gj9P1025T22_mRNA1	0.954498	1.42291e-06	0.00177702	Gj9P1025T22
MSTRG_10027_1	Gj9P1030T20_mRNA1	0.91377	3.24406e-05	0.00914132	Gj9P1030T20
MSTRG_10027_1	Gj9P1035T15_mRNA1	0.995623	1.25555e-11	3.62444e-07	Gj9P1035T15
MSTRG_10027_1	Gj9P1050T26_mRNA1	0.958092	9.4879e-07	0.00139132	Gj9P1050T26
MSTRG_10027_1	Gj9P1052T23_mRNA1	0.917991	2.54248e-05	0.00812397	Gj9P1052T23
MSTRG_10027_1	Gj9P1055T20_mRNA1	0.979912	2.49086e-08	0.000124809	Gj9P1055T20
MSTRG_10027_1	Gj9P1060T24_mRNA1	0.929983	1.17738e-05	0.00556142	Gj9P1060T24
MSTRG_10027_1	Gj9P106T25_mRNA1	0.919506	2.32215e-05	0.00778205	Gj9P106T25
MSTRG_10027_1	Gj9P1070T8_mRNA1	0.963103	5.06192e-07	0.000937799	MSTRG_10611
MSTRG_10027_1	Gj9P1089T10_mRNA1	0.995296	1.80034e-11	4.93454e-07	Gj9P1089T10
MSTRG_10027_1	Gj9P1089T12_mRNA1	0.950409	2.17276e-06	0.00228198	Gj9P1089T12
MSTRG_10027_1	Gj9P1089T7_mRNA1	0.983846	8.43261e-09	5.81836e-05	Gj9P1089T7
MSTRG_10027_1	Gj9P1090T17_mRNA1	0.995997	8.03579e-12	2.47942e-07	Gj9P1090T17
MSTRG_10027_1	Gj9P1102T10_mRNA1	0.952453	1.76664e-06	0.00201719	Gj9P1102T10
MSTRG_10027_1	Gj9P115T24_mRNA1	0.902919	5.75878e-05	0.0119239	Gj9P115T24
MSTRG_10027_1	Gj9P128T20_mRNA1	0.971231	1.47898e-07	0.000421991	Gj9P128T20
MSTRG_10027_1	Gj9P135T27_mRNA1	0.966594	3.09763e-07	0.000689792	Gj9P135T27
MSTRG_10027_1	Gj9P170T21_mRNA1	0.967884	2.54955e-07	0.000609102	Gj9P170T21
MSTRG_10027_1	Gj9P180T14_mRNA1	0.913066	3.37449e-05	0.00931583	MSTRG_6696
MSTRG_10027_1	Gj9P202T13_mRNA1	0.928292	1.32275e-05	0.00589861	Gj9P202T13
MSTRG_10027_1	Gj9P215T19_mRNA1	0.961207	6.48227e-07	0.001097	MSTRG_6958
MSTRG_10027_1	Gj9P220T19_mRNA1	0.93754	6.73758e-06	0.00418843	Gj9P220T19
MSTRG_10027_1	Gj9P224T28_mRNA1	0.917639	2.59595e-05	0.00820538	Gj9P224T28
MSTRG_10027_1	Gj9P22T25_mRNA1	0.923962	1.76012e-05	0.00678754	MSTRG_5519
MSTRG_10027_1	Gj9P240T19_mRNA1	0.948542	2.60551e-06	0.00253584	MSTRG_7131
MSTRG_10027_1	Gj9P247T10_mRNA1	0.959851	7.67941e-07	0.00122097	Gj9P247T10
MSTRG_10027_1	Gj9P24T7_mRNA1	0.990342	6.51211e-10	8.54482e-06	Gj9P24T7
MSTRG_10027_1	Gj9P289T0_mRNA1	0.919407	2.33607e-05	0.00780451	Gj9P289T0
MSTRG_10027_1	Gj9P321T10_mRNA1	0.942808	4.37607e-06	0.00335576	Gj9P321T10
MSTRG_10027_1	Gj9P33T34_mRNA1	0.957135	1.0604e-06	0.00148901	Gj9P33T34
MSTRG_10027_1	Gj9P3T13_mRNA1	0.97066	1.63013e-07	0.000451805	Gj9P3T13
MSTRG_10027_1	Gj9P407T7_mRNA1	0.941077	5.06461e-06	0.00361811	Gj9P407T7
MSTRG_10027_1	Gj9P414T3_mRNA1	0.925591	1.58393e-05	0.00643309	Gj9P414T3
MSTRG_10027_1	Gj9P41T19_mRNA1	0.919616	2.30682e-05	0.00775718	MSTRG_5659
MSTRG_10027_1	Gj9P48T16_mRNA1	0.98101	1.8838e-08	0.000103192	Gj9P48T16
MSTRG_10027_1	Gj9P4T9_mRNA1	0.900431	6.50736e-05	0.0126162	Gj9P4T9
MSTRG_10027_1	Gj9P517T3_mRNA1	0.967148	2.85191e-07	0.000653734	Gj9P517T3
MSTRG_10027_1	Gj9P524T14_mRNA1	0.923311	1.83483e-05	0.00692853	Gj9P524T14
MSTRG_10027_1	Gj9P553T5_mRNA1	0.963031	5.11097e-07	0.000943268	Gj9P553T5
MSTRG_10027_1	Gj9P560T12_mRNA1	0.991237	4.00902e-10	5.84662e-06	Gj9P560T12
MSTRG_10027_1	Gj9P570T21_mRNA1	0.948144	2.70597e-06	0.0025902	Gj9P570T21
MSTRG_10027_1	Gj9P59T10_mRNA1	0.980286	2.26903e-08	0.000117296	Gj9P59T10
MSTRG_10027_1	Gj9P607T8_mRNA1	0.943001	4.30418e-06	0.0033277	Gj9P607T8
MSTRG_10027_1	Gj9P613T4_mRNA1	0.988085	1.85393e-09	1.92844e-05	Gj9P613T4
MSTRG_10027_1	Gj9P614T27_mRNA1	0.945644	3.40981e-06	0.00294769	Gj9P614T27
MSTRG_10027_1	Gj9P618T18_mRNA1	0.973215	1.03807e-07	0.000332912	Gj9P618T18
MSTRG_10027_1	Gj9P632T6_mRNA1	0.928344	1.31802e-05	0.00588824	Gj9P632T6
MSTRG_10027_1	Gj9P634T9_mRNA1	0.902694	5.82356e-05	0.0119855	Gj9P634T9
MSTRG_10027_1	Gj9P652T23_mRNA1	0.990627	5.6084e-10	7.61149e-06	Gj9P652T23
MSTRG_10027_1	Gj9P67T12_mRNA1	0.960504	7.08311e-07	0.00115896	Gj9P67T12
MSTRG_10027_1	Gj9P692T17_mRNA1	0.985181	5.48978e-09	4.23618e-05	MSTRG_8390
MSTRG_10027_1	Gj9P697T28_mRNA1	0.971819	1.33514e-07	0.000392344	MSTRG_8426
MSTRG_10027_1	Gj9P703T13_mRNA1	0.983356	9.78366e-09	6.44262e-05	Gj9P703T13
MSTRG_10027_1	Gj9P72T25_mRNA1	0.922334	1.95134e-05	0.00714572	Gj9P72T25
MSTRG_10027_1	Gj9P741T10_mRNA1	0.942402	4.53028e-06	0.00341781	Gj9P741T10
MSTRG_10027_1	Gj9P75T12_mRNA1	0.995696	1.15485e-11	3.36945e-07	Gj9P75T12
MSTRG_10027_1	Gj9P76T9_mRNA1	0.942231	4.59679e-06	0.00344396	Gj9P76T9
MSTRG_10027_1	Gj9P775T11_mRNA1	0.983599	9.09187e-09	6.13026e-05	Gj9P775T11
MSTRG_10027_1	Gj9P781T27_mRNA1	0.968664	2.25752e-07	0.000562867	MSTRG_8847
MSTRG_10027_1	Gj9P7T15_mRNA1	0.991924	2.66915e-10	4.31062e-06	MSTRG_5417
MSTRG_10027_1	Gj9P811T21_mRNA1	0.979081	3.04583e-08	0.000141967	Gj9P811T21
MSTRG_10027_1	Gj9P820T31_mRNA1	0.949301	2.42214e-06	0.00243219	Gj9P820T31
MSTRG_10027_1	Gj9P821T19_mRNA1	0.93306	9.45377e-06	0.00497315	Gj9P821T19
MSTRG_10027_1	Gj9P844T14_mRNA1	0.962684	5.35213e-07	0.000970285	Gj9P844T14
MSTRG_10027_1	Gj9P844T16_mRNA1	0.927345	1.41011e-05	0.0060838	MSTRG_9199
MSTRG_10027_1	Gj9P850T16_mRNA1	0.93075	1.11571e-05	0.00540853	MSTRG_9246
MSTRG_10027_1	Gj9P876T28_mRNA1	0.909064	4.19713e-05	0.0103296	Gj9P876T28
MSTRG_10027_1	Gj9P898T24_mRNA1	0.955034	1.34231e-06	0.00171812	MSTRG_9593
MSTRG_10027_1	Gj9P909T16_mRNA1	0.907562	4.5435e-05	0.0107098	Gj9P909T16
MSTRG_10027_1	Gj9P921T10_mRNA1	0.900829	6.38257e-05	0.0125059	Gj9P921T10
MSTRG_10027_1	Gj9P921T9_mRNA1	0.981969	1.45614e-08	8.57721e-05	Gj9P921T9
MSTRG_10027_1	Gj9P926T10_mRNA1	0.923493	1.81368e-05	0.00688923	Gj9P926T10
MSTRG_10027_1	Gj9P926T5_mRNA1	0.917118	2.67671e-05	0.00832932	Gj9P926T5
MSTRG_10027_1	Gj9P945T8_mRNA1	0.940617	5.2611e-06	0.00368786	Gj9P945T8
MSTRG_10027_1	Gj9P967T11_mRNA1	0.909616	4.07514e-05	0.010191	MSTRG_9969
MSTRG_10027_1	Gj9P980T21_mRNA1	0.982035	1.42985e-08	8.46855e-05	Gj9P980T21
MSTRG_10027_1	Gj9P991T12_mRNA1	0.982836	1.14009e-08	7.18677e-05	MSTRG_10114
MSTRG_10027_1	Gj9P991T13_mRNA1	0.943006	4.30225e-06	0.00332695	Gj9P991T13
MSTRG_10027_1	Gj9P991T14_mRNA1	0.9651	3.84529e-07	0.000791392	Gj9P991T14
MSTRG_10027_1	Gj9P995T22_mRNA1	0.961017	6.64072e-07	0.00111375	Gj9P995T22
MSTRG_10027_1	Gj9P996T10_mRNA1	0.955303	1.30314e-06	0.00168848	Gj9P996T10
MSTRG_10027_1	Gj9X101T46_mRNA1	0.986729	3.17031e-09	2.90777e-05	Gj9X101T46
MSTRG_10027_1	Gj9X1032T86_mRNA1	0.902977	5.74222e-05	0.011908	Gj9X1032T86
MSTRG_10027_1	Gj9X1043T29_mRNA1	0.986385	3.60184e-09	3.18894e-05	Gj9X1043T29
MSTRG_10027_1	Gj9X1062T83_mRNA1	0.906974	4.68502e-05	0.0108595	Gj9X1062T83
MSTRG_10027_1	Gj9X1069T117_mRNA1	0.916196	2.82444e-05	0.00855259	Gj9X1069T117
MSTRG_10027_1	Gj9X1077T49_mRNA1	0.907928	4.45712e-05	0.0106169	MSTRG_10661
MSTRG_10027_1	Gj9X1088T23_mRNA1	0.98612	3.96394e-09	3.41023e-05	MSTRG_10740
MSTRG_10027_1	Gj9X1100T107_mRNA1	0.940545	5.29236e-06	0.00369923	MSTRG_10825
MSTRG_10027_1	Gj9X117T64_mRNA1	0.937402	6.81079e-06	0.00421236	Gj9X117T64
MSTRG_10027_1	Gj9X119T82_mRNA1	0.903405	5.62085e-05	0.0117909	Gj9X119T82
MSTRG_10027_1	Gj9X122T59_mRNA1	0.970005	1.81824e-07	0.000487018	Gj9X122T59
MSTRG_10027_1	Gj9X126T97_mRNA1	0.994135	5.41318e-11	1.2124e-06	Gj9X126T97
MSTRG_10027_1	Gj9X147T37_mRNA1	0.931883	1.02941e-05	0.0051963	Gj9X147T37
MSTRG_10027_1	Gj9X157T60_mRNA1	0.985998	4.14051e-09	3.51366e-05	Gj9X157T60
MSTRG_10027_1	Gj9X164T66_mRNA1	0.970464	1.6846e-07	0.000462202	Gj9X164T66
MSTRG_10027_1	Gj9X16T61_mRNA1	0.919665	2.29993e-05	0.00774594	Gj9X16T61
MSTRG_10027_1	Gj9X180T104_mRNA1	0.92863	1.29254e-05	0.00583165	Gj9X180T104
MSTRG_10027_1	Gj9X180T49_mRNA1	0.992983	1.3239e-10	2.49191e-06	Gj9X180T49
MSTRG_10027_1	Gj9X195T34_mRNA1	0.961491	6.25154e-07	0.00107207	Gj9X195T34
MSTRG_10027_1	Gj9X243T51_mRNA1	0.979081	3.04583e-08	0.000141967	Gj9X243T51
MSTRG_10027_1	Gj9X265T50_mRNA1	0.903994	5.45685e-05	0.0116297	MSTRG_7241
MSTRG_10027_1	Gj9X303T32_mRNA1	0.974691	7.83754e-08	0.000274886	Gj9X303T32
MSTRG_10027_1	Gj9X319T30_mRNA1	0.997169	1.42641e-12	5.99744e-08	Gj9X319T30
MSTRG_10027_1	Gj9X319T69_mRNA1	0.991464	3.51769e-10	5.31827e-06	Gj9X319T69
MSTRG_10027_1	Gj9X539T20_mRNA1	0.90928	4.14898e-05	0.0102748	MSTRG_7611
MSTRG_10027_1	Gj9X557T19_mRNA1	0.914975	3.0298e-05	0.00884379	MSTRG_7694
MSTRG_10027_1	Gj9X565T24_mRNA1	0.983893	8.30997e-09	5.75873e-05	Gj9X565T24
MSTRG_10027_1	Gj9X579T26_mRNA1	0.911854	3.60885e-05	0.00962136	Gj9X579T26
MSTRG_10027_1	Gj9X606T95_mRNA1	0.979081	3.04583e-08	0.000141967	Gj9X606T95
MSTRG_10027_1	Gj9X652T56_mRNA1	0.929592	1.2098e-05	0.00563997	Gj9X652T56
MSTRG_10027_1	Gj9X689T26_mRNA1	0.977774	4.1149e-08	0.000175276	MSTRG_8356
MSTRG_10027_1	Gj9X696T55_mRNA1	0.979081	3.04583e-08	0.000141967	Gj9X696T55
MSTRG_10027_1	Gj9X702T37_mRNA1	0.927075	1.43587e-05	0.00613613	Gj9X702T37
MSTRG_10027_1	Gj9X709T62_mRNA1	0.907494	4.55964e-05	0.010727	Gj9X709T62
MSTRG_10027_1	Gj9X749T80_mRNA1	0.996587	3.62466e-12	1.28543e-07	Gj9X749T80
MSTRG_10027_1	Gj9X778T41_mRNA1	0.914494	3.11394e-05	0.00896092	Gj9X778T41
MSTRG_10027_1	Gj9X795T22_mRNA1	0.922031	1.98873e-05	0.00721404	Gj9X795T22
MSTRG_10027_1	Gj9X804T38_mRNA1	0.977244	4.62619e-08	0.000190297	MSTRG_8962
MSTRG_10027_1	Gj9X806T9_mRNA1	0.986473	3.48678e-09	3.1159e-05	Gj9X806T9
MSTRG_10027_1	Gj9X808T11_mRNA1	0.954729	1.38774e-06	0.00175166	Gj9X808T11
MSTRG_10027_1	Gj9X813T38_mRNA1	0.903646	5.55332e-05	0.0117251	Gj9X813T38
MSTRG_10027_1	Gj9X831T50_mRNA1	0.906117	4.89778e-05	0.0110799	Gj9X831T50
MSTRG_10027_1	Gj9X833T28_mRNA1	0.979081	3.04583e-08	0.000141967	Gj9X833T28
MSTRG_10027_1	Gj9X856T47_mRNA1	0.917958	2.54739e-05	0.00813134	Gj9X856T47
MSTRG_10027_1	Gj9X887T85_mRNA1	0.971502	1.41112e-07	0.000408026	Gj9X887T85
MSTRG_10027_1	Gj9X926T72_mRNA1	0.975058	7.29071e-08	0.000261984	Gj9X926T72
MSTRG_10027_1	Gj9X926T74_mRNA1	0.974146	8.71103e-08	0.000295196	Gj9X926T74
MSTRG_10027_1	Gj9X958T150_mRNA1	0.94663	3.11693e-06	0.00280416	Gj9X958T150
MSTRG_10027_1	Gj9X958T44_mRNA1	0.909994	3.99309e-05	0.010096	Gj9X958T44
MSTRG_10027_1	Gj9X976T54_mRNA1	0.933629	9.06758e-06	0.00486684	Gj9X976T54
MSTRG_10027_1	Gj9X982T19_mRNA1	0.976909	4.97401e-08	0.000200074	Gj9X982T19
MSTRG_10027_1	Gj9X996T58_mRNA1	0.986193	3.86085e-09	3.34852e-05	Gj9X996T58
MSTRG_10027_1	Gj9X996T99_mRNA1	0.996188	6.29918e-12	2.0394e-07	Gj9X996T99
MSTRG_10027_1	Gju12567A0T41_mRNA1	0.944663	3.72272e-06	0.00308972	Gju12567A0T41
MSTRG_10027_1	Gju12567P0T1_mRNA1	0.988945	1.27656e-09	1.43864e-05	Gju12567P0T1
MSTRG_10027_1	Gju12567X0T30_mRNA1	0.944269	3.85451e-06	0.0031462	Gju12567X0T30
MSTRG_10027_1	Gju8859A0T16_mRNA1	0.931944	1.02488e-05	0.00518474	Gju8859A0T16
MSTRG_10027_1	Gju9928P0T9_mRNA1	0.944093	3.91456e-06	0.00317132	Gju9928P0T9
MSTRG_10027_1	MSTRG_10038_1	0.960546	7.04564e-07	0.00115521	MSTRG_10038
MSTRG_10027_1	MSTRG_10115_1	0.941059	5.07231e-06	0.00362084	MSTRG_10115
MSTRG_10027_1	MSTRG_10530_1	0.903291	5.65296e-05	0.0118219	MSTRG_10530
MSTRG_10027_1	MSTRG_1071_1	0.991828	2.83187e-10	4.51247e-06	MSTRG_1071
MSTRG_10027_1	MSTRG_10825_1	0.96161	6.1567e-07	0.00106162	MSTRG_10825
MSTRG_10027_1	MSTRG_1118_1	0.976744	5.15208e-08	0.000205132	MSTRG_1118
MSTRG_10027_1	MSTRG_1366_1	0.924554	1.69448e-05	0.00665863	MSTRG_1366
MSTRG_10027_1	MSTRG_138_1	0.962701	5.33989e-07	0.000968937	MSTRG_138
MSTRG_10027_1	MSTRG_1400_1	0.962941	5.1728e-07	0.000950288	MSTRG_1400
MSTRG_10027_1	MSTRG_1424_1	0.994686	3.30909e-11	8.11793e-07	MSTRG_1424
MSTRG_10027_1	MSTRG_1536_1	0.902622	5.84444e-05	0.0120056	MSTRG_1536
MSTRG_10027_1	MSTRG_1628_1	0.962603	5.40971e-07	0.000976833	MSTRG_1628
MSTRG_10027_1	MSTRG_175_1	0.974297	8.46172e-08	0.000289264	MSTRG_175
MSTRG_10027_1	MSTRG_1785_1	0.971335	1.45248e-07	0.000416583	MSTRG_1785
MSTRG_10027_1	MSTRG_1933_1	0.96054	7.05151e-07	0.0011558	MSTRG_1933
MSTRG_10027_1	MSTRG_2037_1	0.971765	1.34792e-07	0.000394886	MSTRG_2037
MSTRG_10027_1	MSTRG_2727_1	0.92839	1.31395e-05	0.00587926	MSTRG_2727
MSTRG_10027_1	MSTRG_3065_1	0.988135	1.81528e-09	1.89769e-05	MSTRG_3065
MSTRG_10027_1	MSTRG_3216_1	0.935601	7.82433e-06	0.0045259	MSTRG_3216
MSTRG_10027_1	MSTRG_3227_1	0.954846	1.37019e-06	0.00173881	MSTRG_3227
MSTRG_10027_1	MSTRG_3428_1	0.980649	2.06884e-08	0.00011017	MSTRG_3428
MSTRG_10027_1	MSTRG_3511_1	0.990041	7.58905e-10	9.59629e-06	MSTRG_3511
MSTRG_10027_1	MSTRG_3514_1	0.931387	1.06652e-05	0.00528921	MSTRG_3514
MSTRG_10027_1	MSTRG_3629_1	0.922064	1.98464e-05	0.00720663	MSTRG_3629
MSTRG_10027_1	MSTRG_3661_1	0.925751	1.56744e-05	0.00639897	MSTRG_3661
MSTRG_10027_1	MSTRG_3763_1	0.926292	1.51257e-05	0.00628792	MSTRG_3763
MSTRG_10027_1	MSTRG_4201_1	0.946355	3.19655e-06	0.00284393	MSTRG_4201
MSTRG_10027_1	MSTRG_4211_1	0.937166	6.93706e-06	0.00425325	MSTRG_4211
MSTRG_10027_1	MSTRG_4503_1	0.91985	2.2743e-05	0.00770384	MSTRG_4503
MSTRG_10027_1	MSTRG_4648_1	0.916638	2.75281e-05	0.00844585	MSTRG_4648
MSTRG_10027_1	MSTRG_4828_2	0.971856	1.32655e-07	0.000390627	MSTRG_4828
MSTRG_10027_1	MSTRG_4833_1	0.962254	5.66336e-07	0.0010055	MSTRG_4833
MSTRG_10027_1	MSTRG_5019_1	0.950494	2.1545e-06	0.00227061	MSTRG_5019
MSTRG_10027_1	MSTRG_5250_2	0.96957	1.95257e-07	0.000511089	MSTRG_5250
MSTRG_10027_1	MSTRG_5483_1	0.995616	1.26628e-11	3.65128e-07	MSTRG_5483
MSTRG_10027_1	MSTRG_5599_1	0.953516	1.58056e-06	0.00188597	MSTRG_5599
MSTRG_10027_1	MSTRG_6108_1	0.96064	6.96342e-07	0.00114695	MSTRG_6108
MSTRG_10027_1	MSTRG_6237_1	0.931554	1.05392e-05	0.00525802	MSTRG_6237
MSTRG_10027_1	MSTRG_6541_1	0.951204	2.00691e-06	0.00217617	MSTRG_6541
MSTRG_10027_1	MSTRG_7004_1	0.931886	1.02918e-05	0.00519572	MSTRG_7004
MSTRG_10027_1	MSTRG_7172_1	0.9941	5.5759e-11	1.24099e-06	MSTRG_7172
MSTRG_10027_1	MSTRG_7320_1	0.943915	3.97613e-06	0.00319669	MSTRG_7320
MSTRG_10027_1	MSTRG_7321_1	0.991149	4.21588e-10	6.05804e-06	MSTRG_7321
MSTRG_10027_1	MSTRG_7378_1	0.95828	9.27945e-07	0.00137237	MSTRG_7378
MSTRG_10027_1	MSTRG_7598_1	0.972537	1.17502e-07	0.000360952	MSTRG_7598
MSTRG_10027_1	MSTRG_7622_1	0.971563	1.39624e-07	0.000404926	MSTRG_7622
MSTRG_10027_1	MSTRG_7732_1	0.952223	1.80908e-06	0.00204593	MSTRG_7732
MSTRG_10027_1	MSTRG_8075_1	0.909375	4.12808e-05	0.0102513	MSTRG_8075
MSTRG_10027_1	MSTRG_8129_2	0.911498	3.68014e-05	0.00971329	MSTRG_8129
MSTRG_10027_1	MSTRG_8161_1	0.988055	1.8773e-09	1.94689e-05	MSTRG_8161
MSTRG_10027_1	MSTRG_8374_3	0.911289	3.72229e-05	0.00976678	MSTRG_8374
MSTRG_10027_1	MSTRG_8388_1	0.936222	7.46205e-06	0.00441746	MSTRG_8388
MSTRG_10027_1	MSTRG_8392_1	0.948391	2.64344e-06	0.00255655	MSTRG_8392
MSTRG_10027_1	MSTRG_8499_1	0.984463	6.94652e-09	5.05895e-05	MSTRG_8499
MSTRG_10027_1	MSTRG_8510_2	0.94253	4.48108e-06	0.00339823	MSTRG_8510
MSTRG_10027_1	MSTRG_8618_1	0.93391	8.88152e-06	0.00481622	MSTRG_8618
MSTRG_10027_1	MSTRG_9174_1	0.915024	3.02144e-05	0.00883235	MSTRG_9174
MSTRG_10027_1	MSTRG_9244_1	0.99105	4.45641e-10	6.32938e-06	MSTRG_9244
MSTRG_10027_1	MSTRG_9352_1	0.948864	2.52638e-06	0.00249177	MSTRG_9352
MSTRG_10027_1	MSTRG_936_1	0.965269	3.75409e-07	0.000779742	MSTRG_936
MSTRG_10027_1	MSTRG_9548_1	0.958079	9.50202e-07	0.00139259	MSTRG_9548
MSTRG_10027_1	MSTRG_9598_1	0.950662	2.11891e-06	0.00224833	MSTRG_9598
MSTRG_10027_1	MSTRG_963_1	0.963308	4.92458e-07	0.000922495	MSTRG_963
MSTRG_10027_1	MSTRG_976_1	0.9823	1.32833e-08	8.03747e-05	MSTRG_976
MSTRG_10027_1	MSTRG_9844_1	0.975033	7.32746e-08	0.00026287	MSTRG_9844
MSTRG_10027_1	MSTRG_9938_1	0.990302	6.64574e-10	8.6776e-06	MSTRG_9938
MSTRG_10028_1	Gj10A268T72_mRNA1	0.926914	1.45137e-05	0.00616714	MSTRG_933
MSTRG_10028_1	Gj10A274T103_mRNA1	-0.901496	6.17803e-05	0.0123205	MSTRG_954
MSTRG_10028_1	Gj10A284T89_mRNA1	0.917248	2.65637e-05	0.00829761	MSTRG_1025
MSTRG_10028_1	Gj10A288T90_mRNA1	0.932822	9.619e-06	0.0050185	MSTRG_1053
MSTRG_10028_1	Gj10P219T2_mRNA1	-0.908786	4.25946e-05	0.0104001	Gj10P219T2
MSTRG_10028_1	Gj10P281T13_mRNA1	0.910753	3.83265e-05	0.00990389	MSTRG_999
MSTRG_10028_1	Gj10P293T12_mRNA1	0.901129	6.29014e-05	0.012423	MSTRG_1093
MSTRG_10028_1	Gj10X267T49_mRNA1	-0.922719	1.9047e-05	0.00705877	Gj10X267T49
MSTRG_10028_1	Gj11A236T97_mRNA1	0.937854	6.57357e-06	0.00413397	MSTRG_1315
MSTRG_10028_1	Gj11A378T81_mRNA1	-0.917704	2.58592e-05	0.00819015	Gj11A378T81
MSTRG_10028_1	Gj11A407T92_mRNA1	0.906337	4.84237e-05	0.0110233	Gj11A407T92
MSTRG_10028_1	Gj11A424T110_mRNA1	0.937642	6.68418e-06	0.00417084	MSTRG_1775
MSTRG_10028_1	Gj11A428T72_mRNA1	0.948375	2.64744e-06	0.00255872	Gj11A428T72
MSTRG_10028_1	Gj11A434T72_mRNA1	0.918261	2.50206e-05	0.00806277	MSTRG_1847
MSTRG_10028_1	Gj11P368T11_mRNA1	0.945977	3.30841e-06	0.0028991	Gj11P368T11
MSTRG_10028_1	Gj11P410T19_mRNA1	-0.91124	3.73229e-05	0.00977938	Gj11P410T19
MSTRG_10028_1	Gj11X256T16_mRNA1	-0.918066	2.53124e-05	0.00810706	Gj11X256T16
MSTRG_10028_1	Gj11X404T61_mRNA1	0.901045	6.3158e-05	0.0124461	MSTRG_1646
MSTRG_10028_1	Gj1A484T84_mRNA1	0.955838	1.22812e-06	0.00162963	MSTRG_491
MSTRG_10028_1	Gj1A486T57_mRNA1	0.913781	3.24206e-05	0.00913859	Gj1A486T57
MSTRG_10028_1	Gj1A486T58_mRNA1	0.942302	4.56922e-06	0.00343316	MSTRG_497
MSTRG_10028_1	Gj1A71T42_mRNA1	-0.904161	5.41119e-05	0.0115847	Gj1A71T42
MSTRG_10028_1	Gj1A94T59_mRNA1	0.911544	3.67074e-05	0.00970128	Gj1A94T59
MSTRG_10028_1	Gj1P484T10_mRNA1	0.947342	2.91788e-06	0.00270311	Gj1P484T10
MSTRG_10028_1	Gj1X139T11_mRNA1	-0.944171	3.88764e-06	0.0031601	Gj1X139T11
MSTRG_10028_1	Gj1X272T7_mRNA1	-0.919736	2.29016e-05	0.00772994	Gj1X272T7
MSTRG_10028_1	Gj1X529T102_mRNA1	-0.901225	6.26057e-05	0.0123961	MSTRG_663
MSTRG_10028_1	Gj2A373T104_mRNA1	0.916386	2.79351e-05	0.00850684	MSTRG_2279
MSTRG_10028_1	Gj2A476T21_mRNA1	0.927921	1.35639e-05	0.00597138	MSTRG_2557
MSTRG_10028_1	Gj2P348T11_mRNA1	-0.906742	4.742e-05	0.010919	Gj2P348T11
MSTRG_10028_1	Gj2P370T21_mRNA1	0.900455	6.49981e-05	0.0126095	MSTRG_2264
MSTRG_10028_1	Gj2X381T89_mRNA1	0.924593	1.6902e-05	0.00665005	Gj2X381T89
MSTRG_10028_1	Gj2X44T16_mRNA1	-0.92637	1.50478e-05	0.00627278	Gj2X44T16
MSTRG_10028_1	Gj3A262T43_mRNA1	-0.952539	1.75099e-06	0.00200645	Gj3A262T43
MSTRG_10028_1	Gj3A281T48_mRNA1	-0.912899	3.40613e-05	0.00935709	Gj3A281T48
MSTRG_10028_1	Gj3A312T66_mRNA1	-0.910688	3.84615e-05	0.00992038	Gj3A312T66
MSTRG_10028_1	Gj3A343T92_mRNA1	0.923008	1.87034e-05	0.00699532	MSTRG_3094
MSTRG_10028_1	Gj3P4T15_mRNA1	0.953142	1.64412e-06	0.00193149	Gj3P4T15
MSTRG_10028_1	Gj3X293T34_mRNA1	0.901931	6.04733e-05	0.0121985	Gj3X293T34
MSTRG_10028_1	Gj3X319T20_mRNA1	0.967661	2.63817e-07	0.000622377	MSTRG_2962
MSTRG_10028_1	Gj3X339T64_mRNA1	-0.911364	3.70705e-05	0.00974751	Gj3X339T64
MSTRG_10028_1	Gj3X346T108_mRNA1	-0.961747	6.04939e-07	0.00104966	Gj3X346T108
MSTRG_10028_1	Gj4A176T20_mRNA1	0.91003	3.98542e-05	0.010087	Gj4A176T20
MSTRG_10028_1	Gj4A359T37_mRNA1	0.947542	2.86384e-06	0.00267464	Gj4A359T37
MSTRG_10028_1	Gj4A478T87_mRNA1	-0.939608	5.7136e-06	0.00384644	Gj4A478T87
MSTRG_10028_1	Gj4A504T50_mRNA1	0.907678	4.51599e-05	0.0106804	MSTRG_3720
MSTRG_10028_1	Gj4P54T2_mRNA1	0.937144	6.94945e-06	0.00425723	MSTRG_3293
MSTRG_10028_1	Gj4X386T9_mRNA1	-0.903978	5.4615e-05	0.0116343	MSTRG_3532
MSTRG_10028_1	Gj4X501T27_mRNA1	0.908701	4.27871e-05	0.0104216	MSTRG_3699
MSTRG_10028_1	Gj5A109T19_mRNA1	-0.917728	2.58226e-05	0.00818458	Gj5A109T19
MSTRG_10028_1	Gj5A308T78_mRNA1	0.900863	6.37223e-05	0.0124967	MSTRG_3964
MSTRG_10028_1	Gj5A309T91_mRNA1	0.937487	6.76586e-06	0.00419769	MSTRG_3976
MSTRG_10028_1	Gj5A342T32_mRNA1	0.9019	6.05675e-05	0.0122074	Gj5A342T32
MSTRG_10028_1	Gj5A380T61_mRNA1	0.908058	4.4266e-05	0.0105839	MSTRG_4041
MSTRG_10028_1	Gj5A87T9_mRNA1	0.922418	1.94116e-05	0.00712689	MSTRG_3847
MSTRG_10028_1	Gj5P112T6_mRNA1	-0.908189	4.39637e-05	0.0105511	Gj5P112T6
MSTRG_10028_1	Gj6A242T55_mRNA1	0.948354	2.65276e-06	0.0025616	MSTRG_4282
MSTRG_10028_1	Gj6A281T18_mRNA1	0.950231	2.21145e-06	0.00230596	Gj6A281T18
MSTRG_10028_1	Gj6A47T44_mRNA1	0.912644	3.45463e-05	0.00941957	MSTRG_4155
MSTRG_10028_1	Gj6P62T9_mRNA1	-0.907035	4.67028e-05	0.010844	MSTRG_4173
MSTRG_10028_1	Gj6X270T10_mRNA1	-0.910408	3.90497e-05	0.00999151	Gj6X270T10
MSTRG_10028_1	Gj6X341T75_mRNA1	-0.923539	1.80834e-05	0.00687923	Gj6X341T75
MSTRG_10028_1	Gj7A352T63_mRNA1	-0.90488	5.21774e-05	0.011399	MSTRG_4698
MSTRG_10028_1	Gj7A60T35_mRNA1	0.91791	2.55474e-05	0.00814243	Gj7A60T35
MSTRG_10028_1	Gj7P339T13_mRNA1	0.913864	3.22685e-05	0.00911776	Gj7P339T13
MSTRG_10028_1	Gj7P357T4_mRNA1	0.913949	3.21144e-05	0.00909654	MSTRG_4704
MSTRG_10028_1	Gj7X411T38_mRNA1	-0.919372	2.34105e-05	0.0078125	Gj7X411T38
MSTRG_10028_1	Gj8A353T107_mRNA1	0.910275	3.93307e-05	0.0100251	MSTRG_5196
MSTRG_10028_1	Gj8A395T120_mRNA1	0.931023	1.09437e-05	0.00535681	MSTRG_5333
MSTRG_10028_1	Gj8P44T11_mRNA1	-0.910306	3.92655e-05	0.0100173	Gj8P44T11
MSTRG_10028_1	Gj9A1020T83_mRNA1	0.939248	5.8826e-06	0.00390249	MSTRG_10251
MSTRG_10028_1	Gj9A1026T95_mRNA1	0.908954	4.22168e-05	0.0103575	MSTRG_10283
MSTRG_10028_1	Gj9A1069T138_mRNA1	0.933137	9.40081e-06	0.00495845	MSTRG_10604
MSTRG_10028_1	Gj9A106T74_mRNA1	0.935215	8.05671e-06	0.00459288	Gj9A106T74
MSTRG_10028_1	Gj9A1090T111_mRNA1	0.928526	1.30177e-05	0.00585228	MSTRG_10754
MSTRG_10028_1	Gj9A11T123_mRNA1	0.930103	1.16755e-05	0.00553721	MSTRG_5449
MSTRG_10028_1	Gj9A123T94_mRNA1	0.958114	9.46322e-07	0.00138909	MSTRG_6229
MSTRG_10028_1	Gj9A128T110_mRNA1	0.930663	1.12257e-05	0.00542563	MSTRG_6277
MSTRG_10028_1	Gj9A148T117_mRNA1	0.903129	5.69873e-05	0.011866	MSTRG_6451
MSTRG_10028_1	Gj9A14T108_mRNA1	-0.937227	6.90462e-06	0.00424282	MSTRG_5476
MSTRG_10028_1	Gj9A161T73_mRNA1	0.907397	4.58291e-05	0.0107516	MSTRG_6561
MSTRG_10028_1	Gj9A181T90_mRNA1	0.905861	4.96271e-05	0.0111453	MSTRG_6698
MSTRG_10028_1	Gj9A205T100_mRNA1	-0.935028	8.17086e-06	0.00462508	Gj9A205T100
MSTRG_10028_1	Gj9A220T123_mRNA1	0.927666	1.37999e-05	0.00602132	Gj9A220T123
MSTRG_10028_1	Gj9A223T83_mRNA1	0.922255	1.96104e-05	0.00716357	MSTRG_7030
MSTRG_10028_1	Gj9A237T83_mRNA1	-0.921757	2.02297e-05	0.00727606	Gj9A237T83
MSTRG_10028_1	Gj9A239T37_mRNA1	0.926142	1.52761e-05	0.00631744	MSTRG_7122
MSTRG_10028_1	Gj9A24T70_mRNA1	0.919199	2.3655e-05	0.0078515	MSTRG_5538
MSTRG_10028_1	Gj9A29T84_mRNA1	0.90826	4.37983e-05	0.0105331	MSTRG_5573
MSTRG_10028_1	Gj9A50T73_mRNA1	-0.905977	4.93312e-05	0.0111156	MSTRG_5719
MSTRG_10028_1	Gj9A535T27_mRNA1	0.91354	3.28623e-05	0.00919852	MSTRG_7593
MSTRG_10028_1	Gj9A53T72_mRNA1	-0.913446	3.3035e-05	0.00922173	MSTRG_5731
MSTRG_10028_1	Gj9A617T82_mRNA1	-0.901743	6.10351e-05	0.0122513	Gj9A617T82
MSTRG_10028_1	Gj9A62T84_mRNA1	-0.931387	1.06651e-05	0.00528917	MSTRG_5796
MSTRG_10028_1	Gj9A639T83_mRNA1	-0.925952	1.54684e-05	0.00635585	Gj9A639T83
MSTRG_10028_1	Gj9A69T88_mRNA1	-0.909839	4.02652e-05	0.0101349	Gj9A69T88
MSTRG_10028_1	Gj9A703T105_mRNA1	-0.947677	2.82774e-06	0.00265535	MSTRG_8483
MSTRG_10028_1	Gj9A758T77_mRNA1	0.928772	1.28004e-05	0.00580348	MSTRG_8745
MSTRG_10028_1	Gj9A761T77_mRNA1	0.921935	2.00064e-05	0.0072357	MSTRG_8756
MSTRG_10028_1	Gj9A772T61_mRNA1	0.941448	4.9102e-06	0.00356245	MSTRG_8808
MSTRG_10028_1	Gj9A820T107_mRNA1	0.909081	4.19328e-05	0.0103252	MSTRG_9053
MSTRG_10028_1	Gj9A849T95_mRNA1	0.905628	5.02224e-05	0.0112044	MSTRG_9242
MSTRG_10028_1	Gj9A900T117_mRNA1	0.906086	4.90538e-05	0.0110876	MSTRG_9613
MSTRG_10028_1	Gj9A941T55_mRNA1	0.904469	5.32779e-05	0.0115056	MSTRG_9824
MSTRG_10028_1	Gj9A982T71_mRNA1	0.933624	9.07047e-06	0.00486763	Gj9A982T71
MSTRG_10028_1	Gj9A99T101_mRNA1	0.922846	1.88956e-05	0.00703095	MSTRG_6067
MSTRG_10028_1	Gj9P1043T16_mRNA1	0.919908	2.26633e-05	0.00769064	MSTRG_10405
MSTRG_10028_1	Gj9P175T7_mRNA1	-0.907973	4.44647e-05	0.0106054	Gj9P175T7
MSTRG_10028_1	Gj9P211T13_mRNA1	-0.912922	3.40177e-05	0.00935142	MSTRG_6934
MSTRG_10028_1	Gj9P218T15_mRNA1	-0.930911	1.1031e-05	0.00537766	MSTRG_6989
MSTRG_10028_1	Gj9P271T17_mRNA1	-0.92091	2.13171e-05	0.00746639	Gj9P271T17
MSTRG_10028_1	Gj9P30T20_mRNA1	-0.918798	2.4231e-05	0.00794196	Gj9P30T20
MSTRG_10028_1	Gj9P4T13_mRNA1	0.928058	1.34387e-05	0.00594453	MSTRG_5396
MSTRG_10028_1	Gj9P546T16_mRNA1	-0.923061	1.86404e-05	0.00698354	Gj9P546T16
MSTRG_10028_1	Gj9P589T7_mRNA1	-0.909733	4.04951e-05	0.0101616	Gj9P589T7
MSTRG_10028_1	Gj9P652T10_mRNA1	-0.917241	2.65746e-05	0.00829932	Gj9P652T10
MSTRG_10028_1	Gj9P691T24_mRNA1	-0.921996	1.99303e-05	0.00722185	Gj9P691T24
MSTRG_10028_1	Gj9P704T17_mRNA1	0.918203	2.51068e-05	0.0080759	MSTRG_8493
MSTRG_10028_1	Gj9P70T28_mRNA1	0.902652	5.83552e-05	0.011997	MSTRG_5852
MSTRG_10028_1	Gj9P795T14_mRNA1	0.915042	3.01824e-05	0.00882796	MSTRG_8934
MSTRG_10028_1	Gj9P800T24_mRNA1	0.922602	1.91885e-05	0.00708528	Gj9P800T24
MSTRG_10028_1	Gj9P815T24_mRNA1	-0.920192	2.22755e-05	0.00762605	MSTRG_9013
MSTRG_10028_1	Gj9P82T15_mRNA1	0.928873	1.27126e-05	0.00578352	MSTRG_5948
MSTRG_10028_1	Gj9P88T17_mRNA1	-0.90591	4.95026e-05	0.0111328	MSTRG_5990
MSTRG_10028_1	Gj9P909T12_mRNA1	-0.919345	2.34478e-05	0.00781848	Gj9P909T12
MSTRG_10028_1	Gj9X1033T69_mRNA1	-0.902367	5.91878e-05	0.012077	Gj9X1033T69
MSTRG_10028_1	Gj9X1040T39_mRNA1	-0.944238	3.86506e-06	0.00315064	Gj9X1040T39
MSTRG_10028_1	Gj9X1088T74_mRNA1	-0.919257	2.35726e-05	0.0078384	Gj9X1088T74
MSTRG_10028_1	Gj9X1098T45_mRNA1	0.910444	3.8974e-05	0.00998242	MSTRG_10805
MSTRG_10028_1	Gj9X140T70_mRNA1	0.920039	2.24832e-05	0.00766066	MSTRG_6396
MSTRG_10028_1	Gj9X172T71_mRNA1	0.913925	3.21582e-05	0.00910258	MSTRG_6645
MSTRG_10028_1	Gj9X212T64_mRNA1	-0.90521	5.13095e-05	0.0113133	Gj9X212T64
MSTRG_10028_1	Gj9X218T88_mRNA1	-0.950938	2.0612e-06	0.00221154	MSTRG_6998
MSTRG_10028_1	Gj9X262T105_mRNA1	0.911751	3.62928e-05	0.0096479	Gj9X262T105
MSTRG_10028_1	Gj9X545T24_mRNA1	0.903372	5.62988e-05	0.0117997	MSTRG_7638
MSTRG_10028_1	Gj9X559T32_mRNA1	0.91503	3.02042e-05	0.00883094	MSTRG_7705
MSTRG_10028_1	Gj9X603T61_mRNA1	-0.906835	4.71905e-05	0.010895	Gj9X603T61
MSTRG_10028_1	Gj9X616T25_mRNA1	-0.913027	3.3819e-05	0.00932552	MSTRG_7943
MSTRG_10028_1	Gj9X648T28_mRNA1	0.917214	2.66172e-05	0.00830598	MSTRG_8066
MSTRG_10028_1	Gj9X674T67_mRNA1	-0.916847	2.71945e-05	0.00839517	MSTRG_8233
MSTRG_10028_1	Gj9X740T47_mRNA1	0.915696	2.90715e-05	0.00867243	MSTRG_8681
MSTRG_10028_1	Gj9X758T21_mRNA1	-0.920428	2.19571e-05	0.00757382	Gj9X758T21
MSTRG_10028_1	Gj9X886T54_mRNA1	0.902187	5.97153e-05	0.0121271	Gj9X886T54
MSTRG_10028_1	Gj9X892T57_mRNA1	0.901941	6.0444e-05	0.0121958	MSTRG_9558
MSTRG_10028_1	Gj9X954T43_mRNA1	0.915365	2.96296e-05	0.00875133	Gj9X954T43
MSTRG_10028_1	MSTRG_10342_1	0.926871	1.45555e-05	0.00617545	MSTRG_10342
MSTRG_10028_1	MSTRG_10352_1	0.903245	5.66574e-05	0.0118342	MSTRG_10352
MSTRG_10028_1	MSTRG_10415_1	0.938151	6.42121e-06	0.00408223	MSTRG_10415
MSTRG_10028_1	MSTRG_10695_1	-0.934959	8.21323e-06	0.00463691	MSTRG_10695
MSTRG_10028_1	MSTRG_10785_1	0.92144	2.06317e-05	0.0073476	MSTRG_10785
MSTRG_10028_1	MSTRG_10869_3	0.947061	2.99528e-06	0.00274311	MSTRG_10869
MSTRG_10028_1	MSTRG_1556_1	0.930933	1.10137e-05	0.00537352	MSTRG_1556
MSTRG_10028_1	MSTRG_1808_1	-0.904184	5.40485e-05	0.0115787	MSTRG_1808
MSTRG_10028_1	MSTRG_2193_1	0.902148	5.98308e-05	0.012138	MSTRG_2193
MSTRG_10028_1	MSTRG_260_5	0.910856	3.81132e-05	0.00987772	MSTRG_260
MSTRG_10028_1	MSTRG_2886_1	0.945275	3.5249e-06	0.00300128	MSTRG_2886
MSTRG_10028_1	MSTRG_3179_1	0.914024	3.19791e-05	0.00907783	MSTRG_3179
MSTRG_10028_1	MSTRG_3480_1	0.905122	5.15389e-05	0.0113361	MSTRG_3480
MSTRG_10028_1	MSTRG_4448_1	0.91113	3.75486e-05	0.00980768	MSTRG_4448
MSTRG_10028_1	MSTRG_4542_1	0.944485	3.78182e-06	0.00311528	MSTRG_4542
MSTRG_10028_1	MSTRG_52_1	0.92919	1.24389e-05	0.00572042	MSTRG_52
MSTRG_10028_1	MSTRG_5254_1	0.935943	7.62327e-06	0.00446634	MSTRG_5254
MSTRG_10028_1	MSTRG_5257_1	-0.903234	5.66903e-05	0.0118374	MSTRG_5257
MSTRG_10028_1	MSTRG_5970_1	-0.9111	3.76095e-05	0.00981528	MSTRG_5970
MSTRG_10028_1	MSTRG_6161_1	0.905494	5.05679e-05	0.0112387	MSTRG_6161
MSTRG_10028_1	MSTRG_6189_1	-0.905835	4.96922e-05	0.0111518	MSTRG_6189
MSTRG_10028_1	MSTRG_6230_1	0.903811	5.50758e-05	0.0116801	MSTRG_6230
MSTRG_10028_1	MSTRG_6388_1	0.930454	1.13915e-05	0.00546653	MSTRG_6388
MSTRG_10028_1	MSTRG_6604_1	-0.906962	4.68813e-05	0.0108627	MSTRG_6604
MSTRG_10028_1	MSTRG_6613_1	0.931079	1.09005e-05	0.00534644	MSTRG_6613
MSTRG_10028_1	MSTRG_6727_1	-0.950169	2.22492e-06	0.00231423	MSTRG_6727
MSTRG_10028_1	MSTRG_6906_1	0.951503	1.94707e-06	0.00213739	MSTRG_6906
MSTRG_10028_1	MSTRG_7599_1	-0.913733	3.25081e-05	0.00915053	MSTRG_7599
MSTRG_10028_1	MSTRG_7875_1	0.916265	2.8132e-05	0.00853603	MSTRG_7875
MSTRG_10028_1	MSTRG_7904_1	0.919933	2.26295e-05	0.00768504	MSTRG_7904
MSTRG_10028_1	MSTRG_8010_1	0.940159	5.46283e-06	0.00376014	MSTRG_8010
MSTRG_10028_1	MSTRG_8209_1	0.959893	7.64027e-07	0.00121699	MSTRG_8209
MSTRG_10028_1	MSTRG_8323_1	-0.919345	2.34479e-05	0.0078185	MSTRG_8323
MSTRG_10028_1	MSTRG_8679_1	-0.903862	5.49338e-05	0.011666	MSTRG_8679
MSTRG_10028_1	MSTRG_907_1	0.94317	4.242e-06	0.00330343	MSTRG_907
MSTRG_10028_1	MSTRG_9091_1	-0.90232	5.93255e-05	0.0120901	MSTRG_9091
MSTRG_10028_1	MSTRG_9170_1	0.953757	1.54071e-06	0.0018585	MSTRG_9170
MSTRG_10028_1	MSTRG_9406_1	0.943717	4.04551e-06	0.00322486	MSTRG_9406
MSTRG_10028_1	MSTRG_9504_2	0.90337	5.63067e-05	0.0118004	MSTRG_9504
MSTRG_10028_1	MSTRG_960_1	0.92376	1.78303e-05	0.00683141	MSTRG_960
MSTRG_1003_1	Gj10A281T81_mRNA1	0.908401	4.34733e-05	0.0104976	MSTRG_1005
MSTRG_1003_1	Gj10A285T110_mRNA1	0.935726	7.75073e-06	0.00450427	Gj10A285T110
MSTRG_1003_1	Gj10A289T101_mRNA1	0.918865	2.4134e-05	0.00792684	Gj10A289T101
MSTRG_1003_1	Gj10A303T95_mRNA1	0.935158	8.09145e-06	0.00460273	Gj10A303T95
MSTRG_1003_1	Gj10P16T5_mRNA1	0.923209	1.84667e-05	0.00695091	MSTRG_700
MSTRG_1003_1	Gj10P198T7_mRNA1	0.923591	1.80233e-05	0.00686792	Gj10P198T7
MSTRG_1003_1	Gj10P294T13_mRNA1	0.953057	1.65892e-06	0.00194191	Gj10P294T13
MSTRG_1003_1	Gj11A184T15_mRNA1	0.941981	4.69508e-06	0.00348194	Gj11A184T15
MSTRG_1003_1	Gj11A222T54_mRNA1	0.948784	2.5459e-06	0.00250275	Gj11A222T54
MSTRG_1003_1	Gj11A286T32_mRNA1	0.903295	5.65163e-05	0.0118206	Gj11A286T32
MSTRG_1003_1	Gj11A303T68_mRNA1	0.919858	2.27316e-05	0.00770196	MSTRG_1371
MSTRG_1003_1	Gj11A324T77_mRNA1	0.920722	2.15649e-05	0.00750838	Gj11A324T77
MSTRG_1003_1	Gj11A368T81_mRNA1	0.921704	2.02958e-05	0.00728792	MSTRG_1503
MSTRG_1003_1	Gj11A376T77_mRNA1	0.955814	1.23149e-06	0.00163233	Gj11A376T77
MSTRG_1003_1	Gj11A391T75_mRNA1	0.949152	2.45727e-06	0.00245239	MSTRG_1574
MSTRG_1003_1	Gj11A401T135_mRNA1	0.926675	1.47466e-05	0.00621343	Gj11A401T135
MSTRG_1003_1	Gj11A407T90_mRNA1	0.933644	9.05766e-06	0.00486415	MSTRG_1666
MSTRG_1003_1	Gj11A415T156_mRNA1	0.941787	4.77227e-06	0.00351124	Gj11A415T156
MSTRG_1003_1	Gj11P324T10_mRNA1	0.915103	3.00779e-05	0.00881358	MSTRG_1396
MSTRG_1003_1	Gj11P367T19_mRNA1	0.941676	4.81737e-06	0.00352814	Gj11P367T19
MSTRG_1003_1	Gj11P420T12_mRNA1	0.929881	1.18574e-05	0.00558187	MSTRG_1749
MSTRG_1003_1	Gj11X391T59_mRNA1	0.951406	1.9663e-06	0.00214996	Gj11X391T59
MSTRG_1003_1	Gj11X410T56_mRNA1	0.916707	2.74184e-05	0.00842925	MSTRG_1692
MSTRG_1003_1	Gj11X416T34_mRNA1	0.911876	3.60445e-05	0.00961563	Gj11X416T34
MSTRG_1003_1	Gj11X421T40_mRNA1	0.918343	2.48983e-05	0.00804418	Gj11X421T40
MSTRG_1003_1	Gj11X429T37_mRNA1	0.912886	3.40849e-05	0.00936015	MSTRG_1806
MSTRG_1003_1	Gj1A121T74_mRNA1	0.912984	3.39002e-05	0.00933612	Gj1A121T74
MSTRG_1003_1	Gj1A139T14_mRNA1	0.934264	8.65103e-06	0.00475568	MSTRG_320
MSTRG_1003_1	Gj1A22T66_mRNA1	0.977359	4.51049e-08	0.000186989	MSTRG_114
MSTRG_1003_1	Gj1A285T21_mRNA1	0.924278	1.72482e-05	0.00671881	MSTRG_385
MSTRG_1003_1	Gj1A299T15_mRNA1	0.959266	8.24748e-07	0.00127709	MSTRG_381
MSTRG_1003_1	Gj1A405T60_mRNA1	0.950519	2.14927e-06	0.00226735	Gj1A405T60
MSTRG_1003_1	Gj1A540T36_mRNA1	0.909197	4.16739e-05	0.0102955	Gj1A540T36
MSTRG_1003_1	Gj1A88T18_mRNA1	0.920811	2.14477e-05	0.00748858	Gj1A88T18
MSTRG_1003_1	Gj1P467T5_mRNA1	0.926778	1.46452e-05	0.00619318	MSTRG_477
MSTRG_1003_1	Gj1P502T9_mRNA1	0.946894	3.04186e-06	0.00276674	Gj1P502T9
MSTRG_1003_1	Gj1P512T15_mRNA1	0.921549	2.04924e-05	0.00732298	MSTRG_591
MSTRG_1003_1	Gj1P530T8_mRNA1	0.935502	7.88351e-06	0.00454314	Gj1P530T8
MSTRG_1003_1	Gj1P8T16_mRNA1	0.930389	1.14436e-05	0.00547944	Gj1P8T16
MSTRG_1003_1	Gj1X23T33_mRNA1	0.913713	3.25447e-05	0.00915552	Gj1X23T33
MSTRG_1003_1	Gj2A317T66_mRNA1	0.95684	1.09689e-06	0.00152021	Gj2A317T66
MSTRG_1003_1	Gj2A323T24_mRNA1	0.918193	2.51212e-05	0.0080781	MSTRG_2118
MSTRG_1003_1	Gj2A351T44_mRNA1	0.910804	3.82213e-05	0.009891	Gj2A351T44
MSTRG_1003_1	Gj2A411T70_mRNA1	0.920708	2.15831e-05	0.00751144	MSTRG_2478
MSTRG_1003_1	Gj2P64T10_mRNA1	0.952486	1.76048e-06	0.00201297	MSTRG_1978
MSTRG_1003_1	Gj2P77T7_mRNA1	0.920036	2.24873e-05	0.00766133	Gj2P77T7
MSTRG_1003_1	Gj2X314T13_mRNA1	0.932068	1.01576e-05	0.00516129	Gj2X314T13
MSTRG_1003_1	Gj2X351T29_mRNA1	0.956065	1.19733e-06	0.0016048	Gj2X351T29
MSTRG_1003_1	Gj2X371T34_mRNA1	0.916476	2.77891e-05	0.00848508	Gj2X371T34
MSTRG_1003_1	Gj2X452T21_mRNA1	0.910118	3.96651e-05	0.0100647	MSTRG_2535
MSTRG_1003_1	Gj2X77T32_mRNA1	0.932319	9.97613e-06	0.00511402	Gj2X77T32
MSTRG_1003_1	Gj3A187T31_mRNA1	0.919962	2.25896e-05	0.00767839	Gj3A187T31
MSTRG_1003_1	Gj3A273T7_mRNA1	0.927448	1.40041e-05	0.00606383	Gj3A273T7
MSTRG_1003_1	Gj3A288T82_mRNA1	0.936015	7.5816e-06	0.0044538	MSTRG_2809
MSTRG_1003_1	Gj3A288T83_mRNA1	0.959062	8.45334e-07	0.00129671	MSTRG_2814
MSTRG_1003_1	Gj3A311T81_mRNA1	0.90216	5.97946e-05	0.0121346	MSTRG_2915
MSTRG_1003_1	Gj3A340T74_mRNA1	0.906918	4.69868e-05	0.0108738	Gj3A340T74
MSTRG_1003_1	Gj3A341T79_mRNA1	0.906841	4.71759e-05	0.0108935	Gj3A341T79
MSTRG_1003_1	Gj3A34T149_mRNA1	0.916133	2.8348e-05	0.0085678	Gj3A34T149
MSTRG_1003_1	Gj3A83T32_mRNA1	0.911362	3.70746e-05	0.00974804	Gj3A83T32
MSTRG_1003_1	Gj3A84T30_mRNA1	0.905444	5.06993e-05	0.011252	Gj3A84T30
MSTRG_1003_1	Gj3P306T22_mRNA1	0.901691	6.11913e-05	0.0122659	MSTRG_2886
MSTRG_1003_1	Gj3P307T7_mRNA1	0.914721	3.07415e-05	0.00890478	MSTRG_2885
MSTRG_1003_1	Gj3P345T12_mRNA1	0.922251	1.96156e-05	0.00716452	Gj3P345T12
MSTRG_1003_1	Gj3P345T3_mRNA1	0.911199	3.74069e-05	0.00978993	MSTRG_3101
MSTRG_1003_1	Gj3P34T8_mRNA1	0.909543	4.09108e-05	0.0102093	MSTRG_2638
MSTRG_1003_1	Gj3X153T7_mRNA1	0.929674	1.20294e-05	0.00562352	Gj3X153T7
MSTRG_1003_1	Gj3X278T5_mRNA1	0.90232	5.93231e-05	0.0120899	Gj3X278T5
MSTRG_1003_1	Gj3X293T78_mRNA1	0.941087	5.06014e-06	0.00361652	Gj3X293T78
MSTRG_1003_1	Gj3X294T28_mRNA1	0.95305	1.66003e-06	0.00194269	Gj3X294T28
MSTRG_1003_1	Gj3X312T30_mRNA1	0.913165	3.356e-05	0.00929151	Gj3X312T30
MSTRG_1003_1	Gj3X322T67_mRNA1	0.919069	2.38412e-05	0.00788092	MSTRG_2985
MSTRG_1003_1	Gj3X345T46_mRNA1	0.922126	1.97689e-05	0.00719255	Gj3X345T46
MSTRG_1003_1	Gj4A113T15_mRNA1	0.920357	2.20524e-05	0.00758954	Gj4A113T15
MSTRG_1003_1	Gj4A129T65_mRNA1	0.907937	4.4549e-05	0.0106145	Gj4A129T65
MSTRG_1003_1	Gj4A173T56_mRNA1	0.945373	3.49392e-06	0.00298702	Gj4A173T56
MSTRG_1003_1	Gj4A19T47_mRNA1	0.982841	1.13827e-08	7.1782e-05	Gj4A19T47
MSTRG_1003_1	Gj4A1T75_mRNA1	0.939493	5.76714e-06	0.00386438	Gj4A1T75
MSTRG_1003_1	Gj4A26T42_mRNA1	0.961116	6.55726e-07	0.00110496	MSTRG_3229
MSTRG_1003_1	Gj4A339T67_mRNA1	0.916109	2.83875e-05	0.00857359	Gj4A339T67
MSTRG_1003_1	Gj4A36T55_mRNA1	0.921747	2.02417e-05	0.00727822	MSTRG_3261
MSTRG_1003_1	Gj4A424T52_mRNA1	0.958081	9.50031e-07	0.00139243	Gj4A424T52
MSTRG_1003_1	Gj4A446T29_mRNA1	0.962487	5.49286e-07	0.0009862	Gj4A446T29
MSTRG_1003_1	Gj4A480T73_mRNA1	0.942449	4.51237e-06	0.00341071	Gj4A480T73
MSTRG_1003_1	Gj4A496T77_mRNA1	0.906068	4.91005e-05	0.0110923	Gj4A496T77
MSTRG_1003_1	Gj4A66T74_mRNA1	0.919399	2.33717e-05	0.00780628	MSTRG_3317
MSTRG_1003_1	Gj4P18T15_mRNA1	0.926981	1.44488e-05	0.0061542	Gj4P18T15
MSTRG_1003_1	Gj4P53T12_mRNA1	0.905365	5.0904e-05	0.0112727	MSTRG_3290
MSTRG_1003_1	Gj4P55T3_mRNA1	0.909821	4.03047e-05	0.0101395	Gj4P55T3
MSTRG_1003_1	Gj4P56T4_mRNA1	0.946772	3.07644e-06	0.00278408	Gj4P56T4
MSTRG_1003_1	Gj4X167T28_mRNA1	0.913159	3.35709e-05	0.00929295	Gj4X167T28
MSTRG_1003_1	Gj4X408T11_mRNA1	0.962995	5.13522e-07	0.000946029	Gj4X408T11
MSTRG_1003_1	Gj4X467T42_mRNA1	0.900015	6.63955e-05	0.0127372	Gj4X467T42
MSTRG_1003_1	Gj4X502T44_mRNA1	0.97888	3.19405e-08	0.00014664	Gj4X502T44
MSTRG_1003_1	Gj4X58T7_mRNA1	0.949028	2.48688e-06	0.00246933	Gj4X58T7
MSTRG_1003_1	Gj5A20T36_mRNA1	0.902356	5.92182e-05	0.0120799	Gj5A20T36
MSTRG_1003_1	Gj5P118T3_mRNA1	0.934135	8.7348e-06	0.0047777	Gj5P118T3
MSTRG_1003_1	Gj5P355T5_mRNA1	0.907089	4.65713e-05	0.0108302	Gj5P355T5
MSTRG_1003_1	Gj5X221T13_mRNA1	0.940384	5.36322e-06	0.00372478	MSTRG_3906
MSTRG_1003_1	Gj5X309T51_mRNA1	0.928952	1.26434e-05	0.0057677	Gj5X309T51
MSTRG_1003_1	Gj5X333T43_mRNA1	0.936244	7.44947e-06	0.0044136	Gj5X333T43
MSTRG_1003_1	Gj5X57T23_mRNA1	0.920203	2.22604e-05	0.00762361	Gj5X57T23
MSTRG_1003_1	Gj5X63T36_mRNA1	0.907871	4.47051e-05	0.0106314	Gj5X63T36
MSTRG_1003_1	Gj6A293T41_mRNA1	0.910366	3.91386e-05	0.0100022	Gj6A293T41
MSTRG_1003_1	Gj6A297T89_mRNA1	0.918368	2.4861e-05	0.00803855	Gj6A297T89
MSTRG_1003_1	Gj6A331T76_mRNA1	0.905104	5.15872e-05	0.0113409	Gj6A331T76
MSTRG_1003_1	Gj6P313T3_mRNA1	0.925806	1.56181e-05	0.00638724	MSTRG_4361
MSTRG_1003_1	Gj6X316T76_mRNA1	0.93509	8.13275e-06	0.00461438	Gj6X316T76
MSTRG_1003_1	Gj7A361T88_mRNA1	0.926198	1.52198e-05	0.00630639	Gj7A361T88
MSTRG_1003_1	Gj7A383T95_mRNA1	0.92074	2.15414e-05	0.00750441	MSTRG_4780
MSTRG_1003_1	Gj7P291T3_mRNA1	0.939163	5.92278e-06	0.00391558	Gj7P291T3
MSTRG_1003_1	Gj7P302T1_mRNA1	0.931858	1.03125e-05	0.00520099	Gj7P302T1
MSTRG_1003_1	Gj7P394T11_mRNA1	0.953576	1.57057e-06	0.0018791	MSTRG_4817
MSTRG_1003_1	Gj7X272T10_mRNA1	0.920751	2.15264e-05	0.00750188	Gj7X272T10
MSTRG_1003_1	Gj7X272T23_mRNA1	0.940923	5.12972e-06	0.00364107	Gj7X272T23
MSTRG_1003_1	Gj7X291T41_mRNA1	0.93039	1.14429e-05	0.00547924	Gj7X291T41
MSTRG_1003_1	Gj7X302T13_mRNA1	0.908426	4.34153e-05	0.0104912	MSTRG_4644
MSTRG_1003_1	Gj7X316T25_mRNA1	0.910576	3.8696e-05	0.00994887	Gj7X316T25
MSTRG_1003_1	Gj7X361T66_mRNA1	0.924392	1.71225e-05	0.006694	Gj7X361T66
MSTRG_1003_1	Gj7X372T22_mRNA1	0.901165	6.2791e-05	0.012413	Gj7X372T22
MSTRG_1003_1	Gj8A26T56_mRNA1	0.925789	1.56351e-05	0.00639078	Gj8A26T56
MSTRG_1003_1	Gj8A322T58_mRNA1	0.954284	1.45614e-06	0.00180049	Gj8A322T58
MSTRG_1003_1	Gj8A4T60_mRNA1	0.93484	8.28717e-06	0.00465742	MSTRG_4904
MSTRG_1003_1	Gj8E94T1_mRNA2	0.917419	2.6298e-05	0.00825631	Gj8E94T1
MSTRG_1003_1	Gj8P322T5_mRNA1	0.936009	7.5849e-06	0.00445479	Gj8P322T5
MSTRG_1003_1	Gj8P323T1_mRNA1	0.910951	3.79156e-05	0.00985333	Gj8P323T1
MSTRG_1003_1	Gj8P378T12_mRNA1	0.932067	1.01583e-05	0.00516147	Gj8P378T12
MSTRG_1003_1	Gj8P395T7_mRNA1	0.915609	2.9217e-05	0.00869315	MSTRG_5332
MSTRG_1003_1	Gj8P92T6_mRNA1	0.974004	8.95045e-08	0.000300865	MSTRG_5040
MSTRG_1003_1	Gj8X376T58_mRNA1	0.932771	9.65438e-06	0.00502811	Gj8X376T58
MSTRG_1003_1	Gj9A1014T66_mRNA1	0.913751	3.24743e-05	0.00914591	Gj9A1014T66
MSTRG_1003_1	Gj9A1031T85_mRNA1	0.923508	1.81198e-05	0.00688603	Gj9A1031T85
MSTRG_1003_1	Gj9A1036T86_mRNA1	0.908481	4.32902e-05	0.0104775	Gj9A1036T86
MSTRG_1003_1	Gj9A1049T101_mRNA1	0.959053	8.46273e-07	0.0012976	MSTRG_10456
MSTRG_1003_1	Gj9A1095T89_mRNA1	0.969208	2.07034e-07	0.000531305	MSTRG_10783
MSTRG_1003_1	Gj9A118T74_mRNA1	0.931227	1.07871e-05	0.00531902	MSTRG_6194
MSTRG_1003_1	Gj9A119T110_mRNA1	0.951415	1.96452e-06	0.00214879	MSTRG_6202
MSTRG_1003_1	Gj9A126T131_mRNA1	0.902958	5.74748e-05	0.011913	Gj9A126T131
MSTRG_1003_1	Gj9A159T113_mRNA1	0.947688	2.82506e-06	0.00265392	MSTRG_6538
MSTRG_1003_1	Gj9A159T117_mRNA1	0.961465	6.27234e-07	0.00107434	MSTRG_6535
MSTRG_1003_1	Gj9A165T100_mRNA1	0.90237	5.91776e-05	0.012076	Gj9A165T100
MSTRG_1003_1	Gj9A203T97_mRNA1	0.929863	1.18719e-05	0.00558542	MSTRG_6885
MSTRG_1003_1	Gj9A213T91_mRNA1	0.93292	9.55068e-06	0.00499984	Gj9A213T91
MSTRG_1003_1	Gj9A221T97_mRNA1	0.970471	1.68265e-07	0.000461832	MSTRG_7016
MSTRG_1003_1	Gj9A225T92_mRNA1	0.947399	2.90242e-06	0.00269501	Gj9A225T92
MSTRG_1003_1	Gj9A244T90_mRNA1	0.932441	9.88869e-06	0.00509094	MSTRG_7150
MSTRG_1003_1	Gj9A24T69_mRNA1	0.943971	3.95649e-06	0.00318864	MSTRG_5536
MSTRG_1003_1	Gj9A283T117_mRNA1	0.92582	1.56038e-05	0.00638426	MSTRG_7337
MSTRG_1003_1	Gj9A315T24_mRNA1	0.932598	9.77655e-06	0.00506105	Gj9A315T24
MSTRG_1003_1	Gj9A340T28_mRNA1	0.916013	2.85445e-05	0.00859648	Gj9A340T28
MSTRG_1003_1	Gj9A35T95_mRNA1	0.936469	7.32173e-06	0.00437408	MSTRG_5608
MSTRG_1003_1	Gj9A466T16_mRNA1	0.941389	4.9345e-06	0.00357132	MSTRG_7545
MSTRG_1003_1	Gj9A516T68_mRNA1	0.902711	5.81854e-05	0.0119808	Gj9A516T68
MSTRG_1003_1	Gj9A543T42_mRNA1	0.939891	5.58378e-06	0.00380224	Gj9A543T42
MSTRG_1003_1	Gj9A563T43_mRNA1	0.922136	1.97573e-05	0.00719043	MSTRG_7731
MSTRG_1003_1	Gj9A601T81_mRNA1	0.947069	2.99293e-06	0.00274191	Gj9A601T81
MSTRG_1003_1	Gj9A603T89_mRNA1	0.933626	9.06932e-06	0.00486732	MSTRG_7885
MSTRG_1003_1	Gj9A610T142_mRNA1	0.930166	1.16238e-05	0.00552438	MSTRG_7914
MSTRG_1003_1	Gj9A616T68_mRNA1	0.909595	4.07957e-05	0.0101961	MSTRG_7942
MSTRG_1003_1	Gj9A618T94_mRNA1	0.903176	5.68539e-05	0.0118531	MSTRG_7945
MSTRG_1003_1	Gj9A620T84_mRNA1	0.943397	4.15946e-06	0.00327065	Gj9A620T84
MSTRG_1003_1	Gj9A630T70_mRNA1	0.913632	3.26928e-05	0.00917563	MSTRG_7985
MSTRG_1003_1	Gj9A63T86_mRNA1	0.938471	6.26037e-06	0.00402638	MSTRG_5804
MSTRG_1003_1	Gj9A651T86_mRNA1	0.904613	5.28903e-05	0.0114683	Gj9A651T86
MSTRG_1003_1	Gj9A678T94_mRNA1	0.946607	3.12335e-06	0.00280732	MSTRG_8263
MSTRG_1003_1	Gj9A686T82_mRNA1	0.901245	6.25459e-05	0.0123907	MSTRG_8339
MSTRG_1003_1	Gj9A698T65_mRNA1	0.9027	5.82161e-05	0.0119837	MSTRG_8433
MSTRG_1003_1	Gj9A701T123_mRNA1	0.919527	2.3192e-05	0.00777728	MSTRG_8467
MSTRG_1003_1	Gj9A723T92_mRNA1	0.911754	3.62869e-05	0.00964714	Gj9A723T92
MSTRG_1003_1	Gj9A728T71_mRNA1	0.969819	1.8748e-07	0.00049729	MSTRG_8643
MSTRG_1003_1	Gj9A741T93_mRNA1	0.92613	1.52879e-05	0.00631976	MSTRG_8688
MSTRG_1003_1	Gj9A749T104_mRNA1	0.905426	5.07446e-05	0.0112566	Gj9A749T104
MSTRG_1003_1	Gj9A820T113_mRNA1	0.902463	5.89046e-05	0.0120499	Gj9A820T113
MSTRG_1003_1	Gj9A829T57_mRNA1	0.92574	1.56853e-05	0.00640124	Gj9A829T57
MSTRG_1003_1	Gj9A902T123_mRNA1	0.918335	2.4911e-05	0.00804609	Gj9A902T123
MSTRG_1003_1	Gj9A908T56_mRNA1	0.920221	2.22352e-05	0.0076195	MSTRG_9674
MSTRG_1003_1	Gj9A976T74_mRNA1	0.953638	1.56035e-06	0.00187207	Gj9A976T74
MSTRG_1003_1	Gj9A997T71_mRNA1	0.937648	6.68095e-06	0.00416977	MSTRG_10149
MSTRG_1003_1	Gj9P100T16_mRNA1	0.947506	2.87343e-06	0.00267972	MSTRG_6070
MSTRG_1003_1	Gj9P100T17_mRNA1	0.921429	2.06457e-05	0.00735007	Gj9P100T17
MSTRG_1003_1	Gj9P1022T12_mRNA1	0.915169	2.9965e-05	0.008798	MSTRG_10265
MSTRG_1003_1	Gj9P1032T17_mRNA1	0.957101	1.06457e-06	0.00149257	MSTRG_10338
MSTRG_1003_1	Gj9P1032T18_mRNA1	0.906236	4.86769e-05	0.0110492	Gj9P1032T18
MSTRG_1003_1	Gj9P1061T20_mRNA1	0.925799	1.56246e-05	0.0063886	Gj9P1061T20
MSTRG_1003_1	Gj9P1061T21_mRNA1	0.913477	3.29778e-05	0.00921406	Gj9P1061T21
MSTRG_1003_1	Gj9P1079T14_mRNA1	0.92971	1.19994e-05	0.0056163	Gj9P1079T14
MSTRG_1003_1	Gj9P132T7_mRNA1	0.908916	4.23026e-05	0.0103672	Gj9P132T7
MSTRG_1003_1	Gj9P164T12_mRNA1	0.904154	5.41327e-05	0.0115866	Gj9P164T12
MSTRG_1003_1	Gj9P180T15_mRNA1	0.904334	5.36429e-05	0.0115404	Gj9P180T15
MSTRG_1003_1	Gj9P244T16_mRNA1	0.946195	3.24338e-06	0.00286723	MSTRG_7152
MSTRG_1003_1	Gj9P255T12_mRNA1	0.961915	5.91892e-07	0.00103493	MSTRG_7191
MSTRG_1003_1	Gj9P368T12_mRNA1	0.900532	6.47566e-05	0.0125882	MSTRG_7484
MSTRG_1003_1	Gj9P444T5_mRNA1	0.912253	3.53043e-05	0.00951854	MSTRG_7526
MSTRG_1003_1	Gj9P481T3_mRNA1	0.960354	7.21628e-07	0.00117294	MSTRG_7549
MSTRG_1003_1	Gj9P542T8_mRNA1	0.939318	5.84942e-06	0.00389161	MSTRG_7630
MSTRG_1003_1	Gj9P543T3_mRNA1	0.975086	7.25067e-08	0.000261017	Gj9P543T3
MSTRG_1003_1	Gj9P543T4_mRNA1	0.931861	1.03102e-05	0.0052004	Gj9P543T4
MSTRG_1003_1	Gj9P5T11_mRNA1	0.957907	9.69576e-07	0.00140989	Gj9P5T11
MSTRG_1003_1	Gj9P632T9_mRNA1	0.917821	2.5682e-05	0.00816312	Gj9P632T9
MSTRG_1003_1	Gj9P667T27_mRNA1	0.971683	1.36727e-07	0.000398841	Gj9P667T27
MSTRG_1003_1	Gj9P701T9_mRNA1	0.912299	3.52136e-05	0.00950657	MSTRG_8466
MSTRG_1003_1	Gj9P720T14_mRNA1	0.919329	2.34717e-05	0.0078223	MSTRG_8621
MSTRG_1003_1	Gj9P739T9_mRNA1	0.967658	2.63937e-07	0.000622554	Gj9P739T9
MSTRG_1003_1	Gj9P811T12_mRNA1	0.945652	3.40751e-06	0.0029466	MSTRG_8979
MSTRG_1003_1	Gj9P872T14_mRNA1	0.926193	1.52248e-05	0.00630738	Gj9P872T14
MSTRG_1003_1	Gj9P89T24_mRNA1	0.971315	1.45762e-07	0.000417635	MSTRG_6005
MSTRG_1003_1	Gj9P902T17_mRNA1	0.932034	1.01825e-05	0.00516772	MSTRG_9625
MSTRG_1003_1	Gj9P90T10_mRNA1	0.952406	1.77514e-06	0.00202299	MSTRG_6007
MSTRG_1003_1	Gj9P960T12_mRNA1	0.910426	3.90123e-05	0.00998702	MSTRG_9917
MSTRG_1003_1	Gj9P970T7_mRNA1	0.911547	3.67016e-05	0.00970054	Gj9P970T7
MSTRG_1003_1	Gj9P987T7_mRNA1	0.923114	1.85788e-05	0.006972	MSTRG_10093
MSTRG_1003_1	Gj9P987T9_mRNA1	0.95061	2.12993e-06	0.00225526	MSTRG_10095
MSTRG_1003_1	Gj9P988T11_mRNA1	0.955504	1.27463e-06	0.00166644	Gj9P988T11
MSTRG_1003_1	Gj9X1029T101_mRNA1	0.900456	6.49956e-05	0.0126093	Gj9X1029T101
MSTRG_1003_1	Gj9X1047T21_mRNA1	0.933872	8.90661e-06	0.00482281	MSTRG_10433
MSTRG_1003_1	Gj9X152T64_mRNA1	0.911228	3.73472e-05	0.00978243	Gj9X152T64
MSTRG_1003_1	Gj9X164T72_mRNA1	0.921443	2.06281e-05	0.00734697	Gj9X164T72
MSTRG_1003_1	Gj9X168T58_mRNA1	0.940601	5.26796e-06	0.00369036	Gj9X168T58
MSTRG_1003_1	Gj9X231T66_mRNA1	0.926652	1.47684e-05	0.00621776	Gj9X231T66
MSTRG_1003_1	Gj9X653T40_mRNA1	0.937487	6.76585e-06	0.00419769	MSTRG_8095
MSTRG_1003_1	Gj9X686T42_mRNA1	0.912168	3.54693e-05	0.00954021	Gj9X686T42
MSTRG_1003_1	Gj9X701T89_mRNA1	0.933931	8.86741e-06	0.00481252	Gj9X701T89
MSTRG_1003_1	Gj9X832T23_mRNA1	0.90939	4.1246e-05	0.0102473	MSTRG_9141
MSTRG_1003_1	Gj9X963T50_mRNA1	0.930928	1.1018e-05	0.00537456	Gj9X963T50
MSTRG_1003_1	Gj9X981T83_mRNA1	0.914163	3.17289e-05	0.00904302	Gj9X981T83
MSTRG_1003_1	Gju12567A0T42_mRNA1	0.931664	1.04561e-05	0.00523726	MSTRG_10865
MSTRG_1003_1	MSTRG_10081_1	0.901478	6.18365e-05	0.0123257	MSTRG_10081
MSTRG_1003_1	MSTRG_10110_1	0.944545	3.76177e-06	0.00310665	MSTRG_10110
MSTRG_1003_1	MSTRG_10172_1	0.902929	5.75584e-05	0.0119211	MSTRG_10172
MSTRG_1003_1	MSTRG_10327_1	0.938341	6.32521e-06	0.00404905	MSTRG_10327
MSTRG_1003_1	MSTRG_10339_2	0.980545	2.1246e-08	0.000112198	MSTRG_10339
MSTRG_1003_1	MSTRG_116_3	0.951457	1.95627e-06	0.00214341	MSTRG_116
MSTRG_1003_1	MSTRG_1382_2	0.909528	4.09424e-05	0.0102129	MSTRG_1382
MSTRG_1003_1	MSTRG_1695_1	0.932577	9.79137e-06	0.00506502	MSTRG_1695
MSTRG_1003_1	MSTRG_1710_1	0.92291	1.88195e-05	0.00701688	MSTRG_1710
MSTRG_1003_1	MSTRG_1874_1	0.916806	2.72594e-05	0.00840508	MSTRG_1874
MSTRG_1003_1	MSTRG_2075_1	0.901178	6.27507e-05	0.0124093	MSTRG_2075
MSTRG_1003_1	MSTRG_2136_2	0.949305	2.42107e-06	0.00243157	MSTRG_2136
MSTRG_1003_1	MSTRG_2569_1	0.922783	1.89715e-05	0.00704492	MSTRG_2569
MSTRG_1003_1	MSTRG_2932_1	0.925352	1.60892e-05	0.00648414	MSTRG_2932
MSTRG_1003_1	MSTRG_3450_1	0.909667	4.06401e-05	0.0101783	MSTRG_3450
MSTRG_1003_1	MSTRG_3591_2	0.912962	3.39416e-05	0.00934153	MSTRG_3591
MSTRG_1003_1	MSTRG_3677_1	0.944512	3.77268e-06	0.00311135	MSTRG_3677
MSTRG_1003_1	MSTRG_3802_1	0.900005	6.64271e-05	0.01274	MSTRG_3802
MSTRG_1003_1	MSTRG_3975_1	0.920936	2.12839e-05	0.00746073	MSTRG_3975
MSTRG_1003_1	MSTRG_4135_1	0.926112	1.53064e-05	0.00632337	MSTRG_4135
MSTRG_1003_1	MSTRG_4310_1	0.903242	5.66665e-05	0.0118351	MSTRG_4310
MSTRG_1003_1	MSTRG_4429_2	0.906104	4.9009e-05	0.011083	MSTRG_4429
MSTRG_1003_1	MSTRG_4507_1	0.911204	3.73961e-05	0.00978857	MSTRG_4507
MSTRG_1003_1	MSTRG_4651_1	0.904723	5.25964e-05	0.0114399	MSTRG_4651
MSTRG_1003_1	MSTRG_4800_3	0.972719	1.13686e-07	0.00035338	MSTRG_4800
MSTRG_1003_1	MSTRG_4919_1	0.9086	4.3019e-05	0.0104474	MSTRG_4919
MSTRG_1003_1	MSTRG_5116_1	0.935997	7.59172e-06	0.00445685	MSTRG_5116
MSTRG_1003_1	MSTRG_5151_1	0.90687	4.71043e-05	0.010886	MSTRG_5151
MSTRG_1003_1	MSTRG_5209_2	0.950065	2.24794e-06	0.00232827	MSTRG_5209
MSTRG_1003_1	MSTRG_5444_1	0.904151	5.41409e-05	0.0115874	MSTRG_5444
MSTRG_1003_1	MSTRG_5547_2	0.92772	1.37494e-05	0.00601072	MSTRG_5547
MSTRG_1003_1	MSTRG_5735_4	0.935548	7.85581e-06	0.00453509	MSTRG_5735
MSTRG_1003_1	MSTRG_5804_1	0.90886	4.24284e-05	0.0103814	MSTRG_5804
MSTRG_1003_1	MSTRG_584_1	0.949417	2.39504e-06	0.00241643	MSTRG_584
MSTRG_1003_1	MSTRG_593_1	0.901459	6.18942e-05	0.012331	MSTRG_593
MSTRG_1003_1	MSTRG_6192_1	0.902852	5.77799e-05	0.0119422	MSTRG_6192
MSTRG_1003_1	MSTRG_6498_1	0.905257	5.11861e-05	0.011301	MSTRG_6498
MSTRG_1003_1	MSTRG_654_1	0.956157	1.18515e-06	0.00159484	MSTRG_654
MSTRG_1003_1	MSTRG_6712_1	0.901468	6.18648e-05	0.0123283	MSTRG_6712
MSTRG_1003_1	MSTRG_6924_1	0.943056	4.28356e-06	0.00331969	MSTRG_6924
MSTRG_1003_1	MSTRG_6983_2	0.91663	2.75414e-05	0.00844787	MSTRG_6983
MSTRG_1003_1	MSTRG_7100_1	0.908869	4.24075e-05	0.010379	MSTRG_7100
MSTRG_1003_1	MSTRG_7152_2	0.920433	2.19499e-05	0.00757264	MSTRG_7152
MSTRG_1003_1	MSTRG_7276_1	0.916386	2.7935e-05	0.00850683	MSTRG_7276
MSTRG_1003_1	MSTRG_7389_1	0.927188	1.42506e-05	0.0061143	MSTRG_7389
MSTRG_1003_1	MSTRG_7526_2	0.908966	4.21896e-05	0.0103544	MSTRG_7526
MSTRG_1003_1	MSTRG_7672_1	0.942267	4.58266e-06	0.00343843	MSTRG_7672
MSTRG_1003_1	MSTRG_7760_1	0.963905	4.54131e-07	0.000877931	MSTRG_7760
MSTRG_1003_1	MSTRG_7894_1	0.923322	1.83354e-05	0.00692616	MSTRG_7894
MSTRG_1003_1	MSTRG_8454_1	0.909074	4.19476e-05	0.0103269	MSTRG_8454
MSTRG_1003_1	MSTRG_8459_1	0.929744	1.19705e-05	0.00560933	MSTRG_8459
MSTRG_1003_1	MSTRG_8680_1	0.922704	1.90659e-05	0.00706224	MSTRG_8680
MSTRG_1003_1	MSTRG_91_1	0.917519	2.61436e-05	0.00823316	MSTRG_91
MSTRG_1003_1	MSTRG_9389_1	0.953815	1.53119e-06	0.00185197	MSTRG_9389
MSTRG_1003_1	MSTRG_9673_2	0.982481	1.26213e-08	7.74618e-05	MSTRG_9673
MSTRG_1003_1	MSTRG_984_1	0.905439	5.07122e-05	0.0112533	MSTRG_984
MSTRG_1003_1	MSTRG_9890_1	0.913327	3.32571e-05	0.00925139	MSTRG_9890
MSTRG_10036_1	Gj1P22T11_mRNA1	-0.921385	2.07017e-05	0.00735992	MSTRG_111
MSTRG_10036_1	Gj4A423T79_mRNA1	-0.901327	6.22953e-05	0.0123678	Gj4A423T79
MSTRG_10036_1	Gj4A498T67_mRNA1	-0.93346	9.18107e-06	0.00489743	MSTRG_3693
MSTRG_10036_1	Gj9P322T4_mRNA1	-0.931938	1.02533e-05	0.00518589	MSTRG_7434
MSTRG_10036_1	MSTRG_1040_1	-0.900831	6.38194e-05	0.0125054	MSTRG_1040
MSTRG_10036_1	MSTRG_4560_1	0.918597	2.45249e-05	0.00798733	MSTRG_4560
MSTRG_10040_1	Gj10X290T86_mRNA1	0.972322	1.22125e-07	0.000369893	Gj10X290T86
MSTRG_10040_1	Gj11A366T82_mRNA1	0.939881	5.58832e-06	0.00380381	Gj11A366T82
MSTRG_10040_1	Gj11A410T101_mRNA1	-0.916823	2.72326e-05	0.00840099	MSTRG_1686
MSTRG_10040_1	Gj11P299T7_mRNA1	0.913053	3.37701e-05	0.00931913	Gj11P299T7
MSTRG_10040_1	Gj11P369T12_mRNA1	0.947417	2.89757e-06	0.00269246	Gj11P369T12
MSTRG_10040_1	Gj1A523T90_mRNA1	0.94373	4.04064e-06	0.00322289	MSTRG_640
MSTRG_10040_1	Gj1A85T46_mRNA1	0.909225	4.16109e-05	0.0102884	Gj1A85T46
MSTRG_10040_1	Gj1X491T26_mRNA1	0.933914	8.87908e-06	0.00481558	Gj1X491T26
MSTRG_10040_1	Gj2A362T75_mRNA1	0.914917	3.03996e-05	0.00885766	Gj2A362T75
MSTRG_10040_1	Gj2A376T102_mRNA1	0.907398	4.58275e-05	0.0107515	Gj2A376T102
MSTRG_10040_1	Gj2E389T6_mRNA1	0.925454	1.5982e-05	0.00646234	Gj2E389T6
MSTRG_10040_1	Gj2P372T14_mRNA1	0.921769	2.02147e-05	0.00727335	MSTRG_2276
MSTRG_10040_1	Gj2P381T28_mRNA1	0.9093	4.14466e-05	0.01027	Gj2P381T28
[truncated: 72,764 more rows]
