# Supplementary material for: Integrated SMRT and Illumina Sequencing Provide New Insights into Crocin Biosynthesis of Gardenia jasminoides
Source: Int J Mol Sci. 2022 Jun 5;23(11):6321. doi: 10.3390/ijms23116321 (PMC9181021; doi:10.3390/ijms23116321)
Supplement: Supplementary file 1 [file ijms-23-06321-s001.zip › Table S5.xlsx]

## Sheet: Table S5
ID	Description	GeneRatio	BgRatio	pvalue	p.adjust	qvalue	geneID	Count
ko03040	Spliceosome	48/800	167/5594	7.07454e-07	8.20647e-05	6.32985e-05	MSTRG_10262/MSTRG_10429/MSTRG_10680/MSTRG_10780/MSTRG_1372/MSTRG_1755/MSTRG_1758/MSTRG_2039/MSTRG_2062/MSTRG_2083/MSTRG_209/MSTRG_2304/MSTRG_2337/MSTRG_2544/MSTRG_3079/MSTRG_3161/MSTRG_3297/MSTRG_337/MSTRG_3549/MSTRG_3804/MSTRG_4158/MSTRG_4161/MSTRG_425/MSTRG_4341/MSTRG_4559/MSTRG_469/MSTRG_5009/MSTRG_5100/MSTRG_5143/MSTRG_5150/MSTRG_5180/MSTRG_5269/MSTRG_5933/MSTRG_6013/MSTRG_6452/MSTRG_6543/MST…	48
ko00620	Pyruvate metabolism	30/800	88/5594	2.0421e-06	0.000118442	9.13569e-05	MSTRG_10184/MSTRG_10273/MSTRG_10753/MSTRG_1100/MSTRG_1265/MSTRG_139/MSTRG_1731/MSTRG_2322/MSTRG_2449/MSTRG_2772/MSTRG_2921/MSTRG_3768/MSTRG_4342/MSTRG_4344/MSTRG_4452/MSTRG_5503/MSTRG_5687/MSTRG_5845/MSTRG_592/MSTRG_5996/MSTRG_6047/MSTRG_6124/MSTRG_6136/MSTRG_7146/MSTRG_7980/MSTRG_8570/MSTRG_9124/MSTRG_9200/MSTRG_962/MSTRG_9842	30
ko03015	mRNA surveillance pathway	28/800	83/5594	5.64154e-06	0.00021814	0.000168257	MSTRG_10317/MSTRG_10348/MSTRG_10358/MSTRG_10459/MSTRG_10658/MSTRG_10702/MSTRG_10714/MSTRG_1080/MSTRG_1337/MSTRG_1823/MSTRG_1829/MSTRG_1875/MSTRG_2054/MSTRG_3363/MSTRG_3836/MSTRG_469/MSTRG_5100/MSTRG_5150/MSTRG_5180/MSTRG_5235/MSTRG_525/MSTRG_5767/MSTRG_6452/MSTRG_7296/MSTRG_8207/MSTRG_8820/MSTRG_9152/MSTRG_934	28
ko00710	Carbon fixation in photosynthetic organisms	22/800	61/5594	1.7186e-05	0.000498394	0.000384424	MSTRG_10242/MSTRG_10273/MSTRG_10423/MSTRG_10480/MSTRG_10504/MSTRG_1792/MSTRG_2322/MSTRG_2921/MSTRG_3718/MSTRG_4457/MSTRG_4935/MSTRG_5524/MSTRG_5854/MSTRG_6124/MSTRG_6136/MSTRG_6457/MSTRG_7417/MSTRG_8584/MSTRG_9124/MSTRG_9230/MSTRG_9341/MSTRG_9889	22
ko00030	Pentose phosphate pathway	16/800	40/5594	5.71308e-05	0.00132544	0.00102234	MSTRG_10049/MSTRG_10242/MSTRG_10617/MSTRG_10677/MSTRG_3585/MSTRG_3614/MSTRG_4457/MSTRG_4935/MSTRG_5854/MSTRG_72/MSTRG_8065/MSTRG_837/MSTRG_8503/MSTRG_8584/MSTRG_9811/MSTRG_9874	16
ko00970	Aminoacyl-tRNA biosynthesis	18/800	51/5594	0.000137715	0.00266249	0.00205364	MSTRG_1278/MSTRG_1521/MSTRG_2197/MSTRG_3575/MSTRG_3780/MSTRG_4368/MSTRG_4587/MSTRG_4889/MSTRG_5480/MSTRG_5966/MSTRG_8068/MSTRG_8098/MSTRG_828/MSTRG_86/MSTRG_8607/MSTRG_8886/MSTRG_9275/MSTRG_9540	18
ko00280	Valine, leucine and isoleucine degradation	18/800	53/5594	0.000240762	0.00398976	0.0030774	MSTRG_1100/MSTRG_1196/MSTRG_2772/MSTRG_2838/MSTRG_3721/MSTRG_3967/MSTRG_4342/MSTRG_4344/MSTRG_5253/MSTRG_5546/MSTRG_6892/MSTRG_7489/MSTRG_8133/MSTRG_8135/MSTRG_9105/MSTRG_915/MSTRG_9200/MSTRG_9842	18
ko00250	Alanine, aspartate and glutamate metabolism	15/800	42/5594	0.000425432	0.00616876	0.00475812	MSTRG_1336/MSTRG_1792/MSTRG_2561/MSTRG_3248/MSTRG_345/MSTRG_4114/MSTRG_5524/MSTRG_6315/MSTRG_6892/MSTRG_7256/MSTRG_7417/MSTRG_7527/MSTRG_8426/MSTRG_874/MSTRG_9230	15
ko00061	Fatty acid biosynthesis	12/800	31/5594	0.000692345	0.00892355	0.00688296	MSTRG_10184/MSTRG_1265/MSTRG_3203/MSTRG_3711/MSTRG_4564/MSTRG_5845/MSTRG_592/MSTRG_6495/MSTRG_6900/MSTRG_7618/MSTRG_7653/MSTRG_8685	12
ko00640	Propanoate metabolism	13/800	37/5594	0.00121687	0.0134294	0.0103584	MSTRG_10184/MSTRG_1196/MSTRG_1265/MSTRG_2772/MSTRG_2838/MSTRG_3721/MSTRG_5546/MSTRG_5845/MSTRG_592/MSTRG_7489/MSTRG_8570/MSTRG_915/MSTRG_9842	13
ko03013	Nucleocytoplasmic transport	37/800	158/5594	0.00127348	0.0134294	0.0103584	MSTRG_10087/MSTRG_10792/MSTRG_10869/MSTRG_1372/MSTRG_1979/MSTRG_2062/MSTRG_2393/MSTRG_3136/MSTRG_397/MSTRG_469/MSTRG_4943/MSTRG_5100/MSTRG_5150/MSTRG_5180/MSTRG_525/MSTRG_5331/MSTRG_5573/MSTRG_5606/MSTRG_6251/MSTRG_6452/MSTRG_6474/MSTRG_6765/MSTRG_6873/MSTRG_6980/MSTRG_719/MSTRG_7296/MSTRG_7399/MSTRG_751/MSTRG_7556/MSTRG_7574/MSTRG_8091/MSTRG_8460/MSTRG_9207/MSTRG_934/MSTRG_9347/MSTRG_9765/MSTRG_…	37
ko03018	RNA degradation	26/800	101/5594	0.0015905	0.0153748	0.011859	MSTRG_1009/MSTRG_10617/MSTRG_1280/MSTRG_2000/MSTRG_2042/MSTRG_2229/MSTRG_2329/MSTRG_3585/MSTRG_3777/MSTRG_4482/MSTRG_5706/MSTRG_6185/MSTRG_6365/MSTRG_6754/MSTRG_6832/MSTRG_6968/MSTRG_7405/MSTRG_7744/MSTRG_837/MSTRG_8451/MSTRG_8768/MSTRG_8831/MSTRG_9168/MSTRG_9203/MSTRG_9568/MSTRG_9813	26
ko04144	Endocytosis	33/800	142/5594	0.00260676	0.0232603	0.0179413	MSTRG_10333/MSTRG_10401/MSTRG_10521/MSTRG_1057/MSTRG_1298/MSTRG_1656/MSTRG_2272/MSTRG_2816/MSTRG_4804/MSTRG_488/MSTRG_4897/MSTRG_5143/MSTRG_5461/MSTRG_5470/MSTRG_5532/MSTRG_5602/MSTRG_5916/MSTRG_6318/MSTRG_635/MSTRG_6474/MSTRG_7047/MSTRG_7178/MSTRG_7382/MSTRG_7776/MSTRG_7853/MSTRG_8001/MSTRG_8353/MSTRG_8372/MSTRG_8631/MSTRG_8818/MSTRG_9677/MSTRG_9808/MSTRG_9943	33
ko00510	N-Glycan biosynthesis	12/800	36/5594	0.00310001	0.0256858	0.0198121	MSTRG_10424/MSTRG_1088/MSTRG_1172/MSTRG_1358/MSTRG_3302/MSTRG_384/MSTRG_4874/MSTRG_5501/MSTRG_6567/MSTRG_7142/MSTRG_7490/MSTRG_8397	12
ko04136	Autophagy - other	11/800	32/5594	0.00348785	0.0269727	0.0208047	MSTRG_10833/MSTRG_1306/MSTRG_140/MSTRG_1725/MSTRG_3836/MSTRG_399/MSTRG_4374/MSTRG_6300/MSTRG_6477/MSTRG_8229/MSTRG_9460	11
ko00052	Galactose metabolism	16/800	56/5594	0.0040707	0.0295126	0.0227638	MSTRG_10556/MSTRG_10617/MSTRG_10643/MSTRG_10677/MSTRG_1536/MSTRG_3265/MSTRG_3585/MSTRG_4251/MSTRG_4373/MSTRG_5747/MSTRG_6400/MSTRG_7735/MSTRG_7883/MSTRG_837/MSTRG_8454/MSTRG_8870	16
ko00010	Glycolysis / Gluconeogenesis	33/800	150/5594	0.00643538	0.0427662	0.0329867	MSTRG_10049/MSTRG_10423/MSTRG_10617/MSTRG_10677/MSTRG_10753/MSTRG_1100/MSTRG_1731/MSTRG_2449/MSTRG_2772/MSTRG_3585/MSTRG_3614/MSTRG_3768/MSTRG_4006/MSTRG_4009/MSTRG_4342/MSTRG_4344/MSTRG_4452/MSTRG_4935/MSTRG_5296/MSTRG_5854/MSTRG_6047/MSTRG_6457/MSTRG_72/MSTRG_760/MSTRG_7980/MSTRG_837/MSTRG_8570/MSTRG_8768/MSTRG_8870/MSTRG_9200/MSTRG_9341/MSTRG_9842/MSTRG_9874	33
ko00410	beta-Alanine metabolism	14/800	49/5594	0.00700481	0.0427662	0.0329867	MSTRG_1100/MSTRG_1196/MSTRG_1336/MSTRG_2541/MSTRG_2838/MSTRG_3488/MSTRG_3721/MSTRG_4342/MSTRG_4344/MSTRG_5546/MSTRG_7489/MSTRG_915/MSTRG_9200/MSTRG_963	14
ko03050	Proteasome	14/800	49/5594	0.00700481	0.0427662	0.0329867	MSTRG_1861/MSTRG_3565/MSTRG_3952/MSTRG_4730/MSTRG_5385/MSTRG_6867/MSTRG_7657/MSTRG_7910/MSTRG_8261/MSTRG_8724/MSTRG_9225/MSTRG_9310/MSTRG_9386/MSTRG_9480	14
ko00220	Arginine biosynthesis	10/800	32/5594	0.0111065	0.0644174	0.0496868	MSTRG_1792/MSTRG_345/MSTRG_5524/MSTRG_5912/MSTRG_7256/MSTRG_7417/MSTRG_743/MSTRG_7993/MSTRG_8150/MSTRG_9230	10
ko00561	Glycerolipid metabolism	19/800	82/5594	0.0202439	0.10942	0.0843982	MSTRG_10210/MSTRG_10387/MSTRG_10556/MSTRG_1100/MSTRG_2151/MSTRG_2154/MSTRG_2351/MSTRG_2780/MSTRG_4251/MSTRG_4342/MSTRG_4344/MSTRG_4469/MSTRG_5427/MSTRG_5836/MSTRG_6288/MSTRG_7289/MSTRG_7749/MSTRG_8015/MSTRG_9200	19
ko04141	Protein processing in endoplasmic reticulum	40/800	204/5594	0.020752	0.10942	0.0843982	MSTRG_10343/MSTRG_10638/MSTRG_10737/MSTRG_1077/MSTRG_1358/MSTRG_1416/MSTRG_2218/MSTRG_2399/MSTRG_2727/MSTRG_3036/MSTRG_3461/MSTRG_3766/MSTRG_384/MSTRG_4483/MSTRG_4781/MSTRG_5018/MSTRG_5143/MSTRG_5501/MSTRG_5531/MSTRG_5649/MSTRG_5972/MSTRG_5989/MSTRG_603/MSTRG_6109/MSTRG_6291/MSTRG_6405/MSTRG_7084/MSTRG_7526/MSTRG_76/MSTRG_8545/MSTRG_8592/MSTRG_8671/MSTRG_8906/MSTRG_9198/MSTRG_9218/MSTRG_9233/MSTR…	40
ko00290	Valine, leucine and isoleucine biosynthesis	6/800	17/5594	0.0255379	0.1288	0.0993465	MSTRG_5253/MSTRG_6030/MSTRG_622/MSTRG_6749/MSTRG_8133/MSTRG_8135	6
ko00562	Inositol phosphate metabolism	14/800	57/5594	0.026827	0.129664	0.100013	MSTRG_10062/MSTRG_10423/MSTRG_10502/MSTRG_1196/MSTRG_39/MSTRG_4904/MSTRG_538/MSTRG_6951/MSTRG_915/MSTRG_9341/MSTRG_9418/MSTRG_9480/MSTRG_9535/MSTRG_9677	14
ko00564	Glycerophospholipid metabolism	19/800	86/5594	0.032284	0.149798	0.115543	MSTRG_10568/MSTRG_113/MSTRG_1495/MSTRG_2151/MSTRG_2154/MSTRG_2292/MSTRG_2351/MSTRG_2657/MSTRG_5450/MSTRG_5461/MSTRG_5577/MSTRG_5602/MSTRG_605/MSTRG_6288/MSTRG_6336/MSTRG_6951/MSTRG_7289/MSTRG_7749/MSTRG_8015	19
ko03008	Ribosome biogenesis in eukaryotes	17/800	76/5594	0.0371796	0.160356	0.123687	MSTRG_10869/MSTRG_1941/MSTRG_2000/MSTRG_2163/MSTRG_3434/MSTRG_5573/MSTRG_6015/MSTRG_6765/MSTRG_7258/MSTRG_7918/MSTRG_7951/MSTRG_7962/MSTRG_8171/MSTRG_8390/MSTRG_8619/MSTRG_9189/MSTRG_9662	17
ko00310	Lysine degradation	13/800	54/5594	0.0374615	0.160356	0.123687	MSTRG_1100/MSTRG_2731/MSTRG_2732/MSTRG_2734/MSTRG_2740/MSTRG_3498/MSTRG_4342/MSTRG_4344/MSTRG_6506/MSTRG_8061/MSTRG_8203/MSTRG_8248/MSTRG_9200	13
ko04146	Peroxisome	18/800	82/5594	0.0387066	0.160356	0.123687	MSTRG_10162/MSTRG_2306/MSTRG_2620/MSTRG_388/MSTRG_4299/MSTRG_4564/MSTRG_4872/MSTRG_6417/MSTRG_6495/MSTRG_7527/MSTRG_7618/MSTRG_8045/MSTRG_8685/MSTRG_8833/MSTRG_887/MSTRG_9215/MSTRG_955/MSTRG_9901	18
ko00770	Pantothenate and CoA biosynthesis	8/800	29/5594	0.0456524	0.176522	0.136156	MSTRG_10196/MSTRG_3488/MSTRG_5253/MSTRG_622/MSTRG_6749/MSTRG_8133/MSTRG_8135/MSTRG_9278	8
ko00920	Sulfur metabolism	8/800	29/5594	0.0456524	0.176522	0.136156	MSTRG_138/MSTRG_2357/MSTRG_2672/MSTRG_2676/MSTRG_3014/MSTRG_3916/MSTRG_6093/MSTRG_8523	8
ko00020	Citrate cycle (TCA cycle)	11/800	45/5594	0.0481542	0.18019	0.138985	MSTRG_1731/MSTRG_2449/MSTRG_2630/MSTRG_2772/MSTRG_3524/MSTRG_4452/MSTRG_5978/MSTRG_6136/MSTRG_9284/MSTRG_955/MSTRG_9842	11
ko00051	Fructose and mannose metabolism	12/800	52/5594	0.0593227	0.215045	0.165869	MSTRG_10423/MSTRG_10617/MSTRG_2325/MSTRG_3585/MSTRG_4469/MSTRG_4935/MSTRG_5824/MSTRG_5854/MSTRG_72/MSTRG_837/MSTRG_9341/MSTRG_9874	12
ko00340	Histidine metabolism	7/800	26/5594	0.067181	0.236152	0.18215	MSTRG_1100/MSTRG_2976/MSTRG_4342/MSTRG_4344/MSTRG_733/MSTRG_9200/MSTRG_9703	7
ko00071	Fatty acid degradation	15/800	72/5594	0.0818583	0.27784	0.214305	MSTRG_1100/MSTRG_2838/MSTRG_2852/MSTRG_4006/MSTRG_4009/MSTRG_4342/MSTRG_4344/MSTRG_4564/MSTRG_5296/MSTRG_6495/MSTRG_760/MSTRG_7618/MSTRG_8685/MSTRG_887/MSTRG_9200	15
ko00260	Glycine, serine and threonine metabolism	12/800	55/5594	0.0847892	0.27784	0.214305	MSTRG_10364/MSTRG_1792/MSTRG_2772/MSTRG_3507/MSTRG_4516/MSTRG_6030/MSTRG_6892/MSTRG_7068/MSTRG_7527/MSTRG_8552/MSTRG_9200/MSTRG_9842	12
ko00513	Various types of N-glycan biosynthesis	8/800	33/5594	0.0886213	0.27784	0.214305	MSTRG_3302/MSTRG_384/MSTRG_4874/MSTRG_5501/MSTRG_628/MSTRG_6567/MSTRG_7490/MSTRG_8397	8
ko04712	Circadian rhythm - plant	8/800	33/5594	0.0886213	0.27784	0.214305	MSTRG_2454/MSTRG_4908/MSTRG_5947/MSTRG_71/MSTRG_7629/MSTRG_7951/MSTRG_8171/MSTRG_9768	8
ko00906	Carotenoid biosynthesis	9/800	39/5594	0.0948958	0.289682	0.223439	MSTRG_10091/MSTRG_1999/MSTRG_4019/MSTRG_4020/MSTRG_7860/MSTRG_8209/MSTRG_9242/MSTRG_9464/MSTRG_967	9
ko00190	Oxidative phosphorylation	22/800	117/5594	0.104317	0.310275	0.239323	MSTRG_1086/MSTRG_2129/MSTRG_2523/MSTRG_3524/MSTRG_3669/MSTRG_4105/MSTRG_432/MSTRG_4364/MSTRG_5295/MSTRG_5296/MSTRG_5640/MSTRG_5915/MSTRG_6177/MSTRG_7083/MSTRG_7559/MSTRG_8068/MSTRG_8087/MSTRG_8391/MSTRG_8582/MSTRG_9306/MSTRG_9643/MSTRG_9997	22
ko00270	Cysteine and methionine metabolism	17/800	90/5594	0.136347	0.395405	0.304986	MSTRG_2357/MSTRG_2672/MSTRG_2676/MSTRG_2762/MSTRG_3005/MSTRG_5253/MSTRG_5524/MSTRG_5668/MSTRG_6136/MSTRG_6654/MSTRG_6892/MSTRG_7256/MSTRG_7417/MSTRG_8133/MSTRG_8135/MSTRG_8552/MSTRG_9497	17
ko00330	Arginine and proline metabolism	13/800	67/5594	0.152624	0.431814	0.333069	MSTRG_1100/MSTRG_2541/MSTRG_4114/MSTRG_4342/MSTRG_4344/MSTRG_5524/MSTRG_7256/MSTRG_7417/MSTRG_8633/MSTRG_8854/MSTRG_9200/MSTRG_9508/MSTRG_963	13
ko00053	Ascorbate and aldarate metabolism	12/800	62/5594	0.166995	0.450497	0.34748	MSTRG_10390/MSTRG_1100/MSTRG_3023/MSTRG_39/MSTRG_4342/MSTRG_4344/MSTRG_5041/MSTRG_5946/MSTRG_6311/MSTRG_7074/MSTRG_9200/MSTRG_9329	12
ko00630	Glyoxylate and dicarboxylate metabolism	12/800	62/5594	0.166995	0.450497	0.34748	MSTRG_10504/MSTRG_1792/MSTRG_2772/MSTRG_3507/MSTRG_3718/MSTRG_388/MSTRG_4872/MSTRG_6136/MSTRG_7527/MSTRG_9215/MSTRG_9842/MSTRG_9901	12
ko04130	SNARE interactions in vesicular transport	9/800	45/5594	0.185196	0.488245	0.376595	MSTRG_2665/MSTRG_3052/MSTRG_3605/MSTRG_5680/MSTRG_5965/MSTRG_6325/MSTRG_6689/MSTRG_7847/MSTRG_798	9
ko00565	Ether lipid metabolism	5/800	22/5594	0.197115	0.508119	0.391925	MSTRG_2292/MSTRG_5461/MSTRG_5602/MSTRG_6951/MSTRG_7749	5
ko00860	Porphyrin and chlorophyll metabolism	9/800	46/5594	0.203079	0.512112	0.395005	MSTRG_10553/MSTRG_3908/MSTRG_6473/MSTRG_7160/MSTRG_7530/MSTRG_8514/MSTRG_8767/MSTRG_9275/MSTRG_9559	9
ko00230	Purine metabolism	27/800	161/5594	0.210819	0.52032	0.401336	MSTRG_10354/MSTRG_10524/MSTRG_10677/MSTRG_10711/MSTRG_10753/MSTRG_115/MSTRG_1280/MSTRG_1853/MSTRG_192/MSTRG_2142/MSTRG_2620/MSTRG_2941/MSTRG_3014/MSTRG_3242/MSTRG_3248/MSTRG_3768/MSTRG_4871/MSTRG_5141/MSTRG_6/MSTRG_6047/MSTRG_648/MSTRG_670/MSTRG_7642/MSTRG_7980/MSTRG_8451/MSTRG_9171/MSTRG_9948	27
ko00600	Sphingolipid metabolism	5/800	23/5594	0.22434	0.536111	0.413515	MSTRG_10556/MSTRG_4251/MSTRG_8037/MSTRG_8732/MSTRG_9730	5
ko00790	Folate biosynthesis	6/800	29/5594	0.226461	0.536111	0.413515	MSTRG_10469/MSTRG_2492/MSTRG_2662/MSTRG_4047/MSTRG_6121/MSTRG_9598	6
ko04070	Phosphatidylinositol signaling system	11/800	64/5594	0.303094	0.703178	0.542379	MSTRG_10062/MSTRG_10502/MSTRG_2151/MSTRG_2154/MSTRG_39/MSTRG_4904/MSTRG_538/MSTRG_9418/MSTRG_9480/MSTRG_9535/MSTRG_9677	11
ko04122	Sulfur relay system	3/800	14/5594	0.323362	0.728693	0.562059	MSTRG_2492/MSTRG_3274/MSTRG_3275	3
ko00100	Steroid biosynthesis	6/800	33/5594	0.330405	0.728693	0.562059	MSTRG_2729/MSTRG_2730/MSTRG_3561/MSTRG_7844/MSTRG_8623/MSTRG_9262	6
ko04120	Ubiquitin mediated proteolysis	21/800	132/5594	0.332937	0.728693	0.562059	MSTRG_10179/MSTRG_10596/MSTRG_10843/MSTRG_174/MSTRG_187/MSTRG_2399/MSTRG_2887/MSTRG_2949/MSTRG_3126/MSTRG_3799/MSTRG_5217/MSTRG_5951/MSTRG_6405/MSTRG_6583/MSTRG_7091/MSTRG_7096/MSTRG_71/MSTRG_7671/MSTRG_9198/MSTRG_9233/MSTRG_9307	21
ko00240	Pyrimidine metabolism	24/800	153/5594	0.344008	0.738981	0.569994	MSTRG_10524/MSTRG_10711/MSTRG_1280/MSTRG_1582/MSTRG_1853/MSTRG_192/MSTRG_2662/MSTRG_2941/MSTRG_3242/MSTRG_3488/MSTRG_4871/MSTRG_6/MSTRG_604/MSTRG_6315/MSTRG_648/MSTRG_6524/MSTRG_6575/MSTRG_739/MSTRG_7533/MSTRG_7642/MSTRG_7967/MSTRG_8451/MSTRG_9171/MSTRG_9948	24
ko00511	Other glycan degradation	4/800	22/5594	0.387688	0.785987	0.606252	MSTRG_628/MSTRG_8732/MSTRG_9499/MSTRG_9730	4
ko00650	Butanoate metabolism	4/800	22/5594	0.387688	0.785987	0.606252	MSTRG_1336/MSTRG_6163/MSTRG_622/MSTRG_6749	4
ko00760	Nicotinate and nicotinamide metabolism	4/800	22/5594	0.387688	0.785987	0.606252	MSTRG_1463/MSTRG_2555/MSTRG_8426/MSTRG_9171	4
ko03022	Basal transcription factors	8/800	49/5594	0.402102	0.785987	0.606252	MSTRG_1221/MSTRG_3285/MSTRG_3454/MSTRG_4433/MSTRG_5515/MSTRG_59/MSTRG_7731/MSTRG_8789	8
ko00670	One carbon pool by folate	3/800	16/5594	0.406545	0.785987	0.606252	MSTRG_2662/MSTRG_3507/MSTRG_8098	3
ko00740	Riboflavin metabolism	3/800	16/5594	0.406545	0.785987	0.606252	MSTRG_1361/MSTRG_6005/MSTRG_9598	3
ko00750	Vitamin B6 metabolism	2/800	10/5594	0.429848	0.817416	0.630493	MSTRG_4258/MSTRG_5450	2
ko00903	Limonene and pinene degradation	3/800	17/5594	0.447061	0.836437	0.645165	MSTRG_1100/MSTRG_4342/MSTRG_4344	3
ko00196	Photosynthesis - antenna proteins	2/800	11/5594	0.480896	0.868068	0.669563	MSTRG_10092/MSTRG_1869	2
ko00660	C5-Branched dibasic acid metabolism	2/800	11/5594	0.480896	0.868068	0.669563	MSTRG_622/MSTRG_6749	2
ko00603	Glycosphingolipid biosynthesis - globo and isoglobo series	3/800	18/5594	0.486418	0.868068	0.669563	MSTRG_10556/MSTRG_4251/MSTRG_628	3
ko00360	Phenylalanine metabolism	11/800	74/5594	0.495374	0.870657	0.671559	MSTRG_1346/MSTRG_1352/MSTRG_3513/MSTRG_3567/MSTRG_5524/MSTRG_5791/MSTRG_5977/MSTRG_6163/MSTRG_7256/MSTRG_7417/MSTRG_8854	11
ko03030	DNA replication	11/800	75/5594	0.514376	0.883893	0.681768	MSTRG_10323/MSTRG_1652/MSTRG_1853/MSTRG_3717/MSTRG_4038/MSTRG_4046/MSTRG_495/MSTRG_5025/MSTRG_6515/MSTRG_7742/MSTRG_7890	11
ko03020	RNA polymerase	6/800	40/5594	0.518144	0.883893	0.681768	MSTRG_10711/MSTRG_192/MSTRG_3242/MSTRG_4871/MSTRG_6/MSTRG_9948	6
ko00450	Selenocompound metabolism	2/800	12/5594	0.529023	0.889372	0.685995	MSTRG_3014/MSTRG_5668	2
ko00350	Tyrosine metabolism	13/800	93/5594	0.581489	0.96361	0.743257	MSTRG_1346/MSTRG_1352/MSTRG_3513/MSTRG_4006/MSTRG_4009/MSTRG_52/MSTRG_5296/MSTRG_5524/MSTRG_5791/MSTRG_7256/MSTRG_7417/MSTRG_760/MSTRG_9758	13
ko00780	Biotin metabolism	2/800	14/5594	0.615796	1	0.771325	MSTRG_3203/MSTRG_7653	2
ko03430	Mismatch repair	8/800	62/5594	0.679019	1	0.771325	MSTRG_3717/MSTRG_4038/MSTRG_4046/MSTRG_5025/MSTRG_5182/MSTRG_7742/MSTRG_7890/MSTRG_8787	8
ko03420	Nucleotide excision repair	10/800	77/5594	0.679266	1	0.771325	MSTRG_10179/MSTRG_3717/MSTRG_4038/MSTRG_4046/MSTRG_4433/MSTRG_5025/MSTRG_7742/MSTRG_7890/MSTRG_8906/MSTRG_9198	10
ko00062	Fatty acid elongation	3/800	24/5594	0.688021	1	0.771325	MSTRG_2340/MSTRG_7067/MSTRG_7924	3
ko00563	Glycosylphosphatidylinositol (GPI)-anchor biosynthesis	3/800	24/5594	0.688021	1	0.771325	MSTRG_3331/MSTRG_6785/MSTRG_8458	3
ko03060	Protein export	5/800	40/5594	0.696153	1	0.771325	MSTRG_2025/MSTRG_2315/MSTRG_5017/MSTRG_6109/MSTRG_6700	5
ko00900	Terpenoid backbone biosynthesis	7/800	57/5594	0.72564	1	0.771325	MSTRG_11/MSTRG_4298/MSTRG_6918/MSTRG_7109/MSTRG_7465/MSTRG_7913/MSTRG_8427	7
ko00400	Phenylalanine, tyrosine and tryptophan biosynthesis	4/800	34/5594	0.737158	1	0.771325	MSTRG_5524/MSTRG_7256/MSTRG_7417/MSTRG_8542	4
ko00730	Thiamine metabolism	2/800	18/5594	0.751573	1	0.771325	MSTRG_5141/MSTRG_7465	2
ko00520	Amino sugar and nucleotide sugar metabolism	21/800	165/5594	0.75359	1	0.771325	MSTRG_10049/MSTRG_1028/MSTRG_10677/MSTRG_1326/MSTRG_2325/MSTRG_2561/MSTRG_3023/MSTRG_3132/MSTRG_3133/MSTRG_3496/MSTRG_3566/MSTRG_4620/MSTRG_5582/MSTRG_628/MSTRG_6677/MSTRG_681/MSTRG_7040/MSTRG_7735/MSTRG_8278/MSTRG_9390/MSTRG_9633	21
ko00514	Other types of O-glycan biosynthesis	4/800	37/5594	0.796136	1	0.771325	MSTRG_10707/MSTRG_2330/MSTRG_8489/MSTRG_8834	4
ko01040	Biosynthesis of unsaturated fatty acids	3/800	29/5594	0.805546	1	0.771325	MSTRG_2340/MSTRG_3193/MSTRG_887	3
ko00430	Taurine and hypotaurine metabolism	1/800	11/5594	0.817183	1	0.771325	MSTRG_1336	1
ko03010	Ribosome	39/800	309/5594	0.828927	1	0.771325	MSTRG_10189/MSTRG_10317/MSTRG_10472/MSTRG_10645/MSTRG_10721/MSTRG_10817/MSTRG_1192/MSTRG_1663/MSTRG_1687/MSTRG_1862/MSTRG_2050/MSTRG_2094/MSTRG_2132/MSTRG_217/MSTRG_2176/MSTRG_2257/MSTRG_2657/MSTRG_2977/MSTRG_3038/MSTRG_377/MSTRG_398/MSTRG_4130/MSTRG_4457/MSTRG_4904/MSTRG_5782/MSTRG_5949/MSTRG_6061/MSTRG_6079/MSTRG_6158/MSTRG_6710/MSTRG_6807/MSTRG_7051/MSTRG_722/MSTRG_7439/MSTRG_8081/MSTRG_8364/M…	39
ko00232	Caffeine metabolism	1/800	12/5594	0.843379	1	0.771325	MSTRG_2620	1
ko00604	Glycosphingolipid biosynthesis - ganglio series	1/800	12/5594	0.843379	1	0.771325	MSTRG_628	1
ko02010	ABC transporters	7/800	68/5594	0.872681	1	0.771325	MSTRG_10682/MSTRG_1802/MSTRG_2136/MSTRG_3284/MSTRG_6203/MSTRG_8007/MSTRG_8312	7
ko00531	Glycosaminoglycan degradation	2/800	24/5594	0.877283	1	0.771325	MSTRG_4272/MSTRG_628	2
ko00910	Nitrogen metabolism	2/800	25/5594	0.891383	1	0.771325	MSTRG_1769/MSTRG_9590	2
ko00480	Glutathione metabolism	11/800	105/5594	0.902515	1	0.771325	MSTRG_10390/MSTRG_2941/MSTRG_4221/MSTRG_5041/MSTRG_5946/MSTRG_7074/MSTRG_7698/MSTRG_8503/MSTRG_9329/MSTRG_955/MSTRG_9811	11
ko00960	Tropane, piperidine and pyridine alkaloid biosynthesis	4/800	47/5594	0.919988	1	0.771325	MSTRG_10446/MSTRG_5524/MSTRG_7256/MSTRG_7417	4
ko00950	Isoquinoline alkaloid biosynthesis	3/800	38/5594	0.924284	1	0.771325	MSTRG_5524/MSTRG_7256/MSTRG_7417	3
ko03410	Base excision repair	4/800	48/5594	0.927589	1	0.771325	MSTRG_3717/MSTRG_5752/MSTRG_6691/MSTRG_7213	4
ko00500	Starch and sucrose metabolism	26/800	234/5594	0.939549	1	0.771325	MSTRG_10049/MSTRG_10643/MSTRG_10677/MSTRG_135/MSTRG_1536/MSTRG_3552/MSTRG_3583/MSTRG_3586/MSTRG_366/MSTRG_3765/MSTRG_3799/MSTRG_4810/MSTRG_5673/MSTRG_5675/MSTRG_5747/MSTRG_6062/MSTRG_617/MSTRG_7306/MSTRG_7567/MSTRG_7672/MSTRG_7823/MSTRG_7883/MSTRG_8124/MSTRG_8322/MSTRG_9390/MSTRG_9910	26
ko04145	Phagosome	10/800	104/5594	0.942131	1	0.771325	MSTRG_1056/MSTRG_1086/MSTRG_2179/MSTRG_2727/MSTRG_432/MSTRG_488/MSTRG_603/MSTRG_6109/MSTRG_7847/MSTRG_9306	10
ko00130	Ubiquinone and other terpenoid-quinone biosynthesis	4/800	52/5594	0.951895	1	0.771325	MSTRG_3155/MSTRG_3567/MSTRG_6664/MSTRG_7818	4
ko03440	Homologous recombination	6/800	72/5594	0.956616	1	0.771325	MSTRG_1347/MSTRG_2110/MSTRG_5390/MSTRG_5435/MSTRG_7069/MSTRG_7890	6
ko00073	Cutin, suberine and wax biosynthesis	1/800	26/5594	0.982088	1	0.771325	MSTRG_2153	1
ko00902	Monoterpenoid biosynthesis	1/800	30/5594	0.99037	1	0.771325	MSTRG_4011	1
ko04075	Plant hormone signal transduction	28/800	284/5594	0.991234	1	0.771325	MSTRG_10351/MSTRG_10491/MSTRG_1418/MSTRG_2028/MSTRG_2044/MSTRG_258/MSTRG_2652/MSTRG_3406/MSTRG_3886/MSTRG_457/MSTRG_4801/MSTRG_5227/MSTRG_5428/MSTRG_5979/MSTRG_6076/MSTRG_6613/MSTRG_6750/MSTRG_7607/MSTRG_7656/MSTRG_8032/MSTRG_8118/MSTRG_8227/MSTRG_9063/MSTRG_9107/MSTRG_9465/MSTRG_9636/MSTRG_9907/MSTRG_9971	28
ko00592	alpha-Linolenic acid metabolism	6/800	92/5594	0.994006	1	0.771325	MSTRG_2852/MSTRG_2966/MSTRG_5461/MSTRG_605/MSTRG_8837/MSTRG_887	6
ko00908	Zeatin biosynthesis	3/800	76/5594	0.999293	1	0.771325	MSTRG_3950/MSTRG_4816/MSTRG_8591	3
ko00195	Photosynthesis	3/800	77/5594	0.99938	1	0.771325	MSTRG_439/MSTRG_4943/MSTRG_7217	3
ko04016	MAPK signaling pathway - plant	17/800	223/5594	0.999384	1	0.771325	MSTRG_1028/MSTRG_10351/MSTRG_2000/MSTRG_2044/MSTRG_2652/MSTRG_3886/MSTRG_3903/MSTRG_4244/MSTRG_5102/MSTRG_5415/MSTRG_5979/MSTRG_6897/MSTRG_7607/MSTRG_7642/MSTRG_8227/MSTRG_9636/MSTRG_9901	17
ko00941	Flavonoid biosynthesis	3/800	82/5594	0.999681	1	0.771325	MSTRG_1553/MSTRG_3567/MSTRG_8914	3
ko00904	Diterpenoid biosynthesis	2/800	69/5594	0.99972	1	0.771325	MSTRG_6459/MSTRG_7500	2
ko00590	Arachidonic acid metabolism	4/800	96/5594	0.999727	1	0.771325	MSTRG_4221/MSTRG_4894/MSTRG_5461/MSTRG_8617	4
ko00945	Stilbenoid, diarylheptanoid and gingerol biosynthesis	2/800	71/5594	0.999789	1	0.771325	MSTRG_3567/MSTRG_8914	2
ko04626	Plant-pathogen interaction	20/800	265/5594	0.999816	1	0.771325	MSTRG_10666/MSTRG_10737/MSTRG_10747/MSTRG_10768/MSTRG_3100/MSTRG_3310/MSTRG_3904/MSTRG_4569/MSTRG_4619/MSTRG_5102/MSTRG_5764/MSTRG_6222/MSTRG_6897/MSTRG_7665/MSTRG_8043/MSTRG_81/MSTRG_8336/MSTRG_8950/MSTRG_9636/MSTRG_9951	20
ko00591	Linoleic acid metabolism	3/800	92/5594	0.999917	1	0.771325	MSTRG_2966/MSTRG_5461/MSTRG_8617	3
ko00380	Tryptophan metabolism	11/800	191/5594	0.999957	1	0.771325	MSTRG_1100/MSTRG_4019/MSTRG_4020/MSTRG_4342/MSTRG_4344/MSTRG_6599/MSTRG_8455/MSTRG_8617/MSTRG_8854/MSTRG_9200/MSTRG_9901	11
ko00901	Indole alkaloid biosynthesis	1/800	66/5594	0.999965	1	0.771325	MSTRG_4655	1
ko00040	Pentose and glucuronate interconversions	7/800	153/5594	0.999979	1	0.771325	MSTRG_10774/MSTRG_2607/MSTRG_5599/MSTRG_83/MSTRG_8584/MSTRG_9040/MSTRG_9856	7
ko00909	Sesquiterpenoid and triterpenoid biosynthesis	1/800	74/5594	0.99999	1	0.771325	MSTRG_455	1
ko00460	Cyanoamino acid metabolism	6/800	151/5594	0.999994	1	0.771325	MSTRG_2357/MSTRG_3507/MSTRG_4651/MSTRG_5673/MSTRG_5675/MSTRG_617	6
ko00940	Phenylpropanoid biosynthesis	13/800	424/5594	1	1	0.771325	MSTRG_10141/MSTRG_10142/MSTRG_10149/MSTRG_3567/MSTRG_4342/MSTRG_4344/MSTRG_5673/MSTRG_5675/MSTRG_5977/MSTRG_617/MSTRG_8914/MSTRG_9488/MSTRG_9924	13
