# Supplementary material for: Integrated SMRT and Illumina Sequencing Provide New Insights into Crocin Biosynthesis of Gardenia jasminoides
Source: Int J Mol Sci. 2022 Jun 5;23(11):6321. doi: 10.3390/ijms23116321 (PMC9181021; doi:10.3390/ijms23116321)
Supplement: Supplementary file 1 [file ijms-23-06321-s001.zip › Table S6.xlsx]

## Sheet: Table S6
Cluster	ID	Description	GeneRatio	BgRatio	P value	P.adjust	Qvalue	GeneID	Count	Factor
AUG_vs_JUL	ko00040	Pentose and glucuronate interconversions	24/321	153/5621	4.6777e-06	0.000420993	0.000408683	Gj9A62T83/Gj10A223T67/Gj11A111T42/Gj1A13T76/Gj1A20T78/Gj2A367T85/Gj2A451T67/Gj2P367T13/Gj3A10T71/Gj4P507T10/Gj6A281T22/Gj6P281T5/Gj7A401T162/Gj9A754T69/Gj9A90T130/MSTRG_2244/MSTRG_2607/MSTRG_2609/MSTRG_3735/MSTRG_4207/MSTRG_5599/MSTRG_6755/MSTRG_82/MSTRG_8749	24	0.156863
AUG_vs_JUL	ko00945	Stilbenoid, diarylheptanoid and gingerol biosynthesis	12/321	71/5621	0.000593136	0.0266911	0.0259107	Gj2P73T5/Gj7P411T11/Gj1A515T68/Gj2A217T40/Gj3P26T3/Gj4P80T4/Gj6P330T18/Gj9A406T27/Gj9P406T6/MSTRG_6872/MSTRG_8914/MSTRG_9472	12	0.169014
AUG_vs_JUL	ko03030	DNA replication	12/321	75/5621	0.000985279	0.0295584	0.0286941	Gj1A522T77/Gj2P334T13/Gj2P344T11/Gj4A461T77/Gj4A503T86/Gj6A143T26/Gj9A256T76/Gj9A539T70/Gj9A649T67/Gj9P1052T27/MSTRG_1853/MSTRG_6515	12	0.16
AUG_vs_JUL	ko00941	Flavonoid biosynthesis	12/321	82/5621	0.00218169	0.049088	0.0476526	Gj2P73T5/Gj10A298T133/Gj1A515T68/Gj2A217T40/Gj3P26T3/Gj4P80T4/Gj6P330T18/Gj9A406T27/Gj9P406T6/MSTRG_6872/MSTRG_8914/MSTRG_9472	12	0.146341
AUG_vs_JUL	ko00966	Glucosinolate biosynthesis	9/321	60/5621	0.00645599	0.116208	0.11281	Gj11P263T6/Gj4A390T44/Gj4P13T7/Gj4P15T9/Gj4P17T12/Gj9A335T40/MSTRG_1339/MSTRG_3192/MSTRG_3534	9	0.15
AUG_vs_JUL	ko00940	Phenylpropanoid biosynthesis	36/321	424/5621	0.00955015	0.143252	0.139064	Gj2P73T5/Gj3P29T13/Gj3P30T3/Gj7A363T38/Gj7P363T2/Gj9A997T76/MSTRG_2761/MSTRG_3656/Gj10A248T136/Gj10A296T124/Gj1A515T68/Gj1A523T86/Gj1P21T15/Gj1P21T16/Gj1X450T45/Gj2A108T21/Gj2A217T40/Gj2A426T34/Gj3P26T3/Gj4A173T59/Gj4P80T4/Gj5P358T8/Gj5P76T9/Gj6P330T18/Gj9A1062T111/Gj9A406T27/Gj9P406T6/MSTRG_10238/MSTRG_1050/MSTRG_1096/MSTRG_4678/MSTRG_5977/MSTRG_6872/MSTRG_8914/MSTRG_913/MSTRG_9472	36	0.0849057
AUG_vs_JUL	ko04141	Protein processing in endoplasmic reticulum	20/321	204/5621	0.011988	0.154132	0.149625	Gj11X52T9/Gj4X319T22/Gj9A1051T96/Gj9P580T22/Gj9X216T29/Gj9X222T22/MSTRG_10467/MSTRG_10468/MSTRG_2073/MSTRG_3249/MSTRG_4326/MSTRG_4888/MSTRG_5859/MSTRG_7323/MSTRG_7677/MSTRG_7819/MSTRG_8913/MSTRG_9023/MSTRG_9745/Gj1P103T8	20	0.0980392
AUG_vs_JUL	ko00740	Riboflavin metabolism	3/321	16/5621	0.0594156	0.668426	0.648881	Gj9A226T95/MSTRG_4462/MSTRG_9598	3	0.1875
AUG_vs_JUL	ko00052	Galactose metabolism	6/321	56/5621	0.098044	0.98044	0.951773	Gj9A935T79/Gj9A935T83/MSTRG_2773/MSTRG_4334/MSTRG_5275/Gj2A494T18	6	0.107143
AUG_vs_JUL	ko03440	Homologous recombination	7/321	72/5621	0.115098	0.999989	0.970749	Gj4A503T86/Gj6A143T26/Gj9A955T108/Gj9P61T20/Gj9P910T22/MSTRG_400/MSTRG_7069	7	0.0972222
AUG_vs_JUL	ko00380	Tryptophan metabolism	15/321	191/5621	0.128971	0.999989	0.970749	Gj1P528T12/Gj2A373T107/MSTRG_10007/Gj11A327T121/Gj11P263T6/Gj1A406T23/Gj4A390T44/Gj4P13T7/Gj4P15T9/Gj4P17T12/Gj4P25T8/Gj9A724T165/MSTRG_1339/MSTRG_3192/MSTRG_3534	15	0.078534
AUG_vs_JUL	ko00531	Glycosaminoglycan degradation	3/321	24/5621	0.154512	0.999989	0.970749	Gj9A272T92/Gj9A39T102/MSTRG_1635	3	0.125
AUG_vs_JUL	ko00561	Glycerolipid metabolism	7/321	82/5621	0.186317	0.999989	0.970749	Gj1X424T31/Gj7A401T155/Gj9A62T83/Gj9A651T87/MSTRG_7173/Gj9X937T6/MSTRG_5742	7	0.0853659
AUG_vs_JUL	ko00905	Brassinosteroid biosynthesis	6/321	68/5621	0.190721	0.999989	0.970749	Gj1P484T10/Gj9P1000T8/MSTRG_2619/Gj9A1001T111/Gj9A819T119/Gj9P703T13	6	0.0882353
AUG_vs_JUL	ko00790	Folate biosynthesis	3/321	29/5621	0.228183	0.999989	0.970749	Gj9A226T95/Gj4A20T84/MSTRG_9598	3	0.103448
AUG_vs_JUL	ko01040	Biosynthesis of unsaturated fatty acids	3/321	29/5621	0.228183	0.999989	0.970749	MSTRG_10347/MSTRG_1831/Gj4P29T10	3	0.103448
AUG_vs_JUL	ko00010	Glycolysis / Gluconeogenesis	11/321	150/5621	0.236866	0.999989	0.970749	Gj9A62T83/Gj9A656T84/MSTRG_3997/MSTRG_4955/MSTRG_5275/MSTRG_6395/Gj10P208T11/Gj11P342T9/Gj2A494T18/MSTRG_4003/MSTRG_7421	11	0.0733333
AUG_vs_JUL	ko04145	Phagosome	8/321	104/5621	0.241879	0.999989	0.970749	Gj1A80T113/Gj3P46T2/Gj6A30T37/MSTRG_10709/MSTRG_5245/MSTRG_6958/MSTRG_7718/MSTRG_8369	8	0.0769231
AUG_vs_JUL	ko00360	Phenylalanine metabolism	6/321	74/5621	0.246335	0.999989	0.970749	Gj9A406T27/Gj9P406T6/MSTRG_10238/MSTRG_5977/MSTRG_6872/MSTRG_9472	6	0.0810811
AUG_vs_JUL	ko00592	alpha-Linolenic acid metabolism	7/321	92/5621	0.271311	0.999989	0.970749	MSTRG_4955/Gj10P208T11/Gj2A18T57/Gj8A342T91/Gj8A343T89/Gj8A345T66/Gj8P344T3	7	0.076087
AUG_vs_JUL	ko00730	Thiamine metabolism	2/321	18/5621	0.2747	0.999989	0.970749	MSTRG_6252/MSTRG_3690	2	0.111111
AUG_vs_JUL	ko00053	Ascorbate and aldarate metabolism	5/321	62/5621	0.279028	0.999989	0.970749	Gj9A1032T104/Gj2A389T79/MSTRG_4207/MSTRG_467/MSTRG_473	5	0.0806452
AUG_vs_JUL	ko03410	Base excision repair	4/321	48/5621	0.29291	0.999989	0.970749	Gj11A395T73/Gj9A256T76/Gj9A977T101/Gj9P1052T27	4	0.0833333
AUG_vs_JUL	ko00901	Indole alkaloid biosynthesis	5/321	66/5621	0.324413	0.999989	0.970749	Gj9P139T42/MSTRG_269/Gj1A490T78/Gj1A533T52/MSTRG_272	5	0.0757576
AUG_vs_JUL	ko02010	ABC transporters	5/321	68/5621	0.347424	0.999989	0.970749	Gj10A187T125/Gj1P197T8/Gj6A330T69/Gj7X385T42/Gj9A846T86	5	0.0735294
AUG_vs_JUL	ko00514	Other types of O-glycan biosynthesis	3/321	37/5621	0.354756	0.999989	0.970749	Gj9A132T82/Gj9P132T18/MSTRG_7865	3	0.0810811
AUG_vs_JUL	ko00904	Diterpenoid biosynthesis	5/321	69/5621	0.358969	0.999989	0.970749	Gj2P338T5/Gj3A274T35/Gj8A307T53/Gj9A393T36/Gj9P172T11	5	0.0724638
AUG_vs_JUL	ko00565	Ether lipid metabolism	2/321	22/5621	0.360434	0.999989	0.970749	Gj2A341T95/Gj9A833T102	2	0.0909091
AUG_vs_JUL	ko00760	Nicotinate and nicotinamide metabolism	2/321	22/5621	0.360434	0.999989	0.970749	Gj5A31T22/MSTRG_8426	2	0.0909091
AUG_vs_JUL	ko00564	Glycerophospholipid metabolism	6/321	86/5621	0.367744	0.999989	0.970749	Gj7A401T155/Gj9A651T87/Gj2A341T95/Gj9A833T102/Gj9X937T6/MSTRG_5742	6	0.0697674
AUG_vs_JUL	ko00240	Pyrimidine metabolism	10/321	153/5621	0.376365	0.999989	0.970749	Gj11P329T6/Gj7A165T32/Gj7A73T44/Gj8A348T72/Gj9A195T100/Gj9A256T76/Gj9A539T70/Gj9A979T103/MSTRG_1853/MSTRG_8520	10	0.0653595
AUG_vs_JUL	ko00071	Fatty acid degradation	5/321	72/5621	0.393643	0.999989	0.970749	MSTRG_3997/MSTRG_4955/Gj10P208T11/MSTRG_4003/MSTRG_7421	5	0.0694444
AUG_vs_JUL	ko04016	MAPK signaling pathway - plant	14/321	223/5621	0.396183	0.999989	0.970749	Gj10A285T118/Gj2X399T20/MSTRG_2728/MSTRG_7607/Gj1X229T4/Gj1X535T5/Gj3P317T21/Gj3X336T61/Gj4X346T10/Gj6X49T17/Gj8A42T39/Gj9A824T103/MSTRG_7071/MSTRG_8356	14	0.0627803
AUG_vs_JUL	ko00062	Fatty acid elongation	2/321	24/5621	0.401973	0.999989	0.970749	MSTRG_10347/MSTRG_1831	2	0.0833333
AUG_vs_JUL	ko00030	Pentose phosphate pathway	3/321	40/5621	0.402198	0.999989	0.970749	MSTRG_10242/MSTRG_5275/MSTRG_6395	3	0.075
AUG_vs_JUL	ko00910	Nitrogen metabolism	2/321	25/5621	0.422265	0.999989	0.970749	Gj4P64T11/MSTRG_697	2	0.08
AUG_vs_JUL	ko00908	Zeatin biosynthesis	5/321	76/5621	0.439596	0.999989	0.970749	Gj4P64T16/Gj7P390T4/Gj11A310T64/Gj1A406T23/Gj4P54T3	5	0.0657895
AUG_vs_JUL	ko00073	Cutin, suberine and wax biosynthesis	2/321	26/5621	0.442198	0.999989	0.970749	MSTRG_3099/Gj1A515T68	2	0.0769231
AUG_vs_JUL	ko04626	Plant-pathogen interaction	16/321	265/5621	0.446133	0.999989	0.970749	Gj11A40T38/MSTRG_2073/MSTRG_7677/Gj11A322T73/Gj1P80T8/Gj1X229T4/Gj1X535T5/Gj2P394T10/Gj6X49T17/Gj7P255T7/Gj8P56T9/Gj9A15T87/Gj9P67T12/MSTRG_4980/MSTRG_4984/MSTRG_8356	16	0.0603774
AUG_vs_JUL	ko04075	Plant hormone signal transduction	17/321	284/5621	0.456733	0.999989	0.970749	Gj2X399T20/Gj9A817T155/MSTRG_3698/MSTRG_6076/MSTRG_6750/MSTRG_7607/Gj11A370T77/Gj2A136T9/Gj2A458T65/Gj2A458T66/Gj2A459T58/Gj3X336T61/Gj4P500T18/Gj9A123T92/Gj9A667T116/Gj9A822T71/MSTRG_5371	17	0.0598592
AUG_vs_JUL	ko00520	Amino sugar and nucleotide sugar metabolism	10/321	165/5621	0.470444	0.999989	0.970749	Gj10A285T118/Gj3P101T3/Gj4P462T1/Gj6A334T76/Gj9P1090T16/Gj9P1090T17/MSTRG_2590/MSTRG_2591/MSTRG_4207/MSTRG_4833	10	0.0606061
AUG_vs_JUL	ko00943	Isoflavonoid biosynthesis	5/321	79/5621	0.473542	0.999989	0.970749	Gj7P411T11/Gj9P1000T8/MSTRG_2619/Gj5A118T55/Gj9A1001T111	5	0.0632911
AUG_vs_JUL	ko00232	Caffeine metabolism	1/321	12/5621	0.506556	0.999989	0.970749	Gj1P528T12	1	0.0833333
AUG_vs_JUL	ko00960	Tropane, piperidine and pyridine alkaloid biosynthesis	3/321	47/5621	0.508075	0.999989	0.970749	Gj9A810T81/Gj4A278T62/Gj9P73T26	3	0.0638298
AUG_vs_JUL	ko00902	Monoterpenoid biosynthesis	2/321	30/5621	0.517888	0.999989	0.970749	Gj8A84T55/MSTRG_4695	2	0.0666667
AUG_vs_JUL	ko00480	Glutathione metabolism	6/321	105/5621	0.559911	0.999989	0.970749	Gj11A415T158/Gj1A131T68/MSTRG_6563/Gj9A679T100/Gj9A71T112/MSTRG_8520	6	0.0571429
AUG_vs_JUL	ko00780	Biotin metabolism	1/321	14/5621	0.561423	0.999989	0.970749	Gj4P29T10	1	0.0714286
AUG_vs_JUL	ko00051	Fructose and mannose metabolism	3/321	52/5621	0.577411	0.999989	0.970749	MSTRG_5275/MSTRG_5824/MSTRG_6395	3	0.0576923
AUG_vs_JUL	ko00130	Ubiquinone and other terpenoid-quinone biosynthesis	3/321	52/5621	0.577411	0.999989	0.970749	Gj9A406T27/Gj9P406T6/MSTRG_6872	3	0.0576923
AUG_vs_JUL	ko00500	Starch and sucrose metabolism	13/321	234/5621	0.583545	0.999989	0.970749	Gj10A291T83/Gj10A274T114/Gj1P21T15/Gj1P21T16/Gj2A108T21/Gj2A426T34/Gj4A173T59/Gj4A506T55/Gj5P358T8/Gj9A577T73/MSTRG_10090/MSTRG_10513/MSTRG_10517	13	0.0555556
AUG_vs_JUL	ko00400	Phenylalanine, tyrosine and tryptophan biosynthesis	2/321	34/5621	0.586454	0.999989	0.970749	Gj9A1061T111/Gj10A249T91	2	0.0588235
AUG_vs_JUL	ko00270	Cysteine and methionine metabolism	5/321	90/5621	0.590921	0.999989	0.970749	MSTRG_68/Gj10A26T23/Gj5A57T87/Gj7A217T20/Gj9A606T132	5	0.0555556
AUG_vs_JUL	ko00310	Lysine degradation	3/321	54/5621	0.603377	0.999989	0.970749	Gj4P484T9/Gj8P61T16/Gj9P560T12	3	0.0555556
AUG_vs_JUL	ko00350	Tyrosine metabolism	5/321	93/5621	0.620369	0.999989	0.970749	MSTRG_3997/MSTRG_4955/Gj10P208T11/MSTRG_4003/MSTRG_7421	5	0.0537634
AUG_vs_JUL	ko00460	Cyanoamino acid metabolism	8/321	151/5621	0.639012	0.999989	0.970749	Gj1P21T15/Gj1P21T16/Gj2A108T21/Gj2A426T34/Gj4A173T59/Gj5P358T8/Gj9A335T40/MSTRG_8230	8	0.0529801
AUG_vs_JUL	ko00900	Terpenoid backbone biosynthesis	3/321	57/5621	0.640309	0.999989	0.970749	Gj8A84T55/MSTRG_3690/MSTRG_4695	3	0.0526316
AUG_vs_JUL	ko00590	Arachidonic acid metabolism	5/321	96/5621	0.648532	0.999989	0.970749	Gj1P528T12/Gj5A277T51/Gj9P1000T8/Gj9A679T100/Gj9A949T59	5	0.0520833
AUG_vs_JUL	ko03420	Nucleotide excision repair	4/321	77/5621	0.648909	0.999989	0.970749	Gj4A503T86/Gj6A143T26/Gj9A256T76/Gj9P1052T27	4	0.0519481
AUG_vs_JUL	ko00190	Oxidative phosphorylation	6/321	117/5621	0.666126	0.999989	0.970749	Gj10A256T52/Gj9A832T73/Gj9P625T17/MSTRG_9998/Gj9A943T82/Gj9P613T4	6	0.0512821
AUG_vs_JUL	ko00710	Carbon fixation in photosynthetic organisms	3/321	61/5621	0.685702	0.999989	0.970749	Gj9A656T84/MSTRG_10242/MSTRG_6395	3	0.0491803
AUG_vs_JUL	ko03430	Mismatch repair	3/321	62/5621	0.696359	0.999989	0.970749	Gj4A503T86/Gj6A143T26/Gj9P1052T27	3	0.0483871
AUG_vs_JUL	ko04146	Peroxisome	4/321	82/5621	0.697372	0.999989	0.970749	MSTRG_6879/Gj5A301T32/Gj9A949T59/Gj9P560T12	4	0.0487805
AUG_vs_JUL	ko04144	Endocytosis	7/321	142/5621	0.710351	0.999989	0.970749	MSTRG_8913/Gj11A328T59/Gj2A397T161/Gj3A343T91/Gj7P375T3/Gj9A833T102/Gj9P625T14	7	0.0492958
AUG_vs_JUL	ko00650	Butanoate metabolism	1/321	22/5621	0.726419	0.999989	0.970749	Gj5A301T32	1	0.0454545
AUG_vs_JUL	ko00020	Citrate cycle (TCA cycle)	2/321	45/5621	0.736987	0.999989	0.970749	Gj10A256T52/Gj9A656T84	2	0.0444444
AUG_vs_JUL	ko04130	SNARE interactions in vesicular transport	2/321	45/5621	0.736987	0.999989	0.970749	Gj3A333T56/Gj9X870T33	2	0.0444444
AUG_vs_JUL	ko00591	Linoleic acid metabolism	4/321	92/5621	0.779474	0.999989	0.970749	Gj1P528T12/Gj5A277T51/Gj9P1000T8/Gj2A18T57	4	0.0434783
AUG_vs_JUL	ko00970	Aminoacyl-tRNA biosynthesis	2/321	51/5621	0.797563	0.999989	0.970749	Gj9A195T107/MSTRG_4889	2	0.0392157
AUG_vs_JUL	ko00260	Glycine, serine and threonine metabolism	2/321	55/5621	0.830778	0.999989	0.970749	Gj8A71T50/Gj9P560T12	2	0.0363636
AUG_vs_JUL	ko00061	Fatty acid biosynthesis	1/321	31/5621	0.839252	0.999989	0.970749	Gj4P29T10	1	0.0322581
AUG_vs_JUL	ko00562	Inositol phosphate metabolism	2/321	57/5621	0.845477	0.999989	0.970749	Gj9A1032T104/Gj2A341T95	2	0.0350877
AUG_vs_JUL	ko04136	Autophagy - other	1/321	32/5621	0.848482	0.999989	0.970749	Gj6A319T60	1	0.03125
AUG_vs_JUL	ko04712	Circadian rhythm - plant	1/321	33/5621	0.857185	0.999989	0.970749	MSTRG_2454	1	0.030303
AUG_vs_JUL	ko00630	Glyoxylate and dicarboxylate metabolism	2/321	62/5621	0.87729	0.999989	0.970749	Gj5A111T51/Gj8A71T50	2	0.0322581
AUG_vs_JUL	ko00640	Propanoate metabolism	1/321	37/5621	0.887287	0.999989	0.970749	Gj11P342T9	1	0.027027
AUG_vs_JUL	ko04070	Phosphatidylinositol signaling system	2/321	64/5621	0.888238	0.999989	0.970749	Gj6X49T17/MSTRG_8356	2	0.03125
AUG_vs_JUL	ko00906	Carotenoid biosynthesis	1/321	39/5621	0.899874	0.999989	0.970749	Gj9P175T15	1	0.025641
AUG_vs_JUL	ko00250	Alanine, aspartate and glutamate metabolism	1/321	42/5621	0.916176	0.999989	0.970749	MSTRG_8426	1	0.0238095
AUG_vs_JUL	ko00909	Sesquiterpenoid and triterpenoid biosynthesis	2/321	74/5621	0.930607	0.999989	0.970749	MSTRG_455/MSTRG_4695	2	0.027027
AUG_vs_JUL	ko00860	Porphyrin and chlorophyll metabolism	1/321	46/5621	0.933871	0.999989	0.970749	Gj8P47T6	1	0.0217391
AUG_vs_JUL	ko03022	Basal transcription factors	1/321	49/5621	0.94465	0.999989	0.970749	Gj9X1090T29	1	0.0204082
AUG_vs_JUL	ko00280	Valine, leucine and isoleucine degradation	1/321	53/5621	0.956347	0.999989	0.970749	Gj5A301T32	1	0.0188679
AUG_vs_JUL	ko00620	Pyruvate metabolism	2/321	88/5621	0.965164	0.999989	0.970749	Gj9A656T84/Gj11P342T9	2	0.0227273
AUG_vs_JUL	ko03018	RNA degradation	2/321	101/5621	0.981962	0.999989	0.970749	MSTRG_5275/Gj9P910T22	2	0.019802
AUG_vs_JUL	ko00230	Purine metabolism	4/321	161/5621	0.984845	0.999989	0.970749	Gj9A256T76/Gj9A539T70/MSTRG_1853/MSTRG_8520	4	0.0248447
AUG_vs_JUL	ko03015	mRNA surveillance pathway	1/321	83/5621	0.992684	0.999989	0.970749	Gj8P36T9	1	0.0120482
AUG_vs_JUL	ko03013	Nucleocytoplasmic transport	2/321	158/5621	0.999126	0.999989	0.970749	Gj1X511T37/Gj3P311T8	2	0.0126582
AUG_vs_JUL	ko04120	Ubiquitin mediated proteolysis	1/321	132/5621	0.999613	0.999989	0.970749	Gj9A1046T94	1	0.00757576
AUG_vs_JUL	ko03040	Spliceosome	1/321	167/5621	0.999953	0.999989	0.970749	MSTRG_8913	1	0.00598802
AUG_vs_JUL	ko03010	Ribosome	4/321	309/5621	0.999989	0.999989	0.970749	MSTRG_4767/Gj2P42T9/Gj4A198T10/Gj9P291T3	4	0.012945
SEP_vs_JUL	ko00040	Pentose and glucuronate interconversions	33/624	153/5621	0.000110722	0.0124009	0.0116549	Gj2A367T80/Gj9A62T83/MSTRG_3261/Gj10A223T67/Gj11A111T42/Gj11A425T108/Gj1A13T76/Gj1A20T78/Gj2A367T85/Gj2A451T67/Gj2P367T13/Gj3A10T71/Gj4P507T10/Gj6A281T22/Gj6P281T5/Gj7A401T162/Gj9A754T69/Gj9A90T130/MSTRG_10774/MSTRG_2244/MSTRG_2607/MSTRG_2609/MSTRG_3735/MSTRG_3736/MSTRG_4207/MSTRG_5599/MSTRG_6253/MSTRG_6254/MSTRG_6755/MSTRG_805/MSTRG_83/MSTRG_8749/MSTRG_9229	33	0.215686
SEP_vs_JUL	ko00940	Phenylpropanoid biosynthesis	66/624	424/5621	0.00221074	0.0953905	0.0896527	Gj10P303T18/Gj2P379T10/Gj3P29T13/Gj3P30T3/Gj7A363T38/Gj7P363T2/Gj9A997T76/MSTRG_2761/MSTRG_3656/MSTRG_3704/MSTRG_5538/MSTRG_8900/MSTRG_9924/Gj10A296T124/Gj11A392T102/Gj1A523T86/Gj1P21T15/Gj1P21T16/Gj1P21T17/Gj1P21T18/Gj1P437T8/Gj1P437T9/Gj1P448T8/Gj1X438T57/Gj1X450T45/Gj2A108T21/Gj2A112T27/Gj2A217T40/Gj2A426T32/Gj2A426T34/Gj2A431T35/Gj2P318T17/Gj2P423T6/Gj3P26T3/Gj3P304T13/Gj4A11T96/Gj4A173T59/Gj…	66	0.15566
SEP_vs_JUL	ko00905	Brassinosteroid biosynthesis	16/624	68/5621	0.0025551	0.0953905	0.0896527	Gj1A486T57/Gj1P484T10/Gj9P1000T8/MSTRG_1143/MSTRG_2619/MSTRG_315/MSTRG_491/MSTRG_497/Gj1A434T56/Gj7X275T7/Gj7X391T17/Gj9A682T136/Gj9A833T108/Gj9P1001T10/Gj9P1001T6/Gj9P703T13	16	0.235294
SEP_vs_JUL	ko00908	Zeatin biosynthesis	16/624	76/5621	0.00811889	0.227329	0.213655	Gj4P55T1/Gj4P55T4/Gj4P64T16/Gj7P390T4/MSTRG_763/Gj10A305T62/Gj10A305T63/Gj11A310T64/Gj1A406T23/Gj4P53T6/Gj7A394T85/Gj9A4T94/Gj9A9T94/Gj9X4T83/MSTRG_3287/MSTRG_3950	16	0.210526
SEP_vs_JUL	ko00520	Amino sugar and nucleotide sugar metabolism	27/624	165/5621	0.0240226	0.337628	0.317319	Gj10A285T118/Gj11P368T11/Gj3A329T50/Gj9A1019T81/Gj2A417T60/Gj2A417T62/Gj3A297T86/Gj3P101T3/Gj4P462T1/Gj6A334T76/Gj7P31T2/Gj9A887T106/Gj9P1090T16/Gj9P1090T17/Gj9P156T16/Gj9P803T10/MSTRG_1027/MSTRG_2590/MSTRG_2591/MSTRG_3496/MSTRG_4207/MSTRG_4498/MSTRG_4499/MSTRG_4502/MSTRG_4504/MSTRG_4506/MSTRG_4833	27	0.163636
SEP_vs_JUL	ko00500	Starch and sucrose metabolism	36/624	234/5621	0.0251046	0.337628	0.317319	MSTRG_10643/MSTRG_3552/MSTRG_3682/MSTRG_5307/MSTRG_7672/MSTRG_8703/Gj10A267T119/Gj10A274T114/Gj11A313T85/Gj11P349T10/Gj1P21T15/Gj1P21T16/Gj1P21T17/Gj1P21T18/Gj2A108T21/Gj2A112T27/Gj2A426T32/Gj2A426T34/Gj2A431T35/Gj2P318T17/Gj2P423T6/Gj4A173T59/Gj5A116T47/Gj5P358T8/Gj9A44T104/Gj9A524T111/Gj9A577T73/Gj9A866T98/Gj9P283T25/MSTRG_10090/MSTRG_10513/MSTRG_10517/MSTRG_1536/MSTRG_3864/MSTRG_4691/MSTRG_7609	36	0.153846
SEP_vs_JUL	ko00943	Isoflavonoid biosynthesis	15/624	79/5621	0.025334	0.337628	0.317319	Gj2A370T89/Gj2P370T20/Gj7P411T11/Gj9P1000T8/MSTRG_2264/MSTRG_2619/MSTRG_315/MSTRG_3225/Gj5A118T55/Gj7A411T61/Gj9P1001T10/Gj9P1001T6/Gj9P999T10/Gj9P999T16/MSTRG_7480	15	0.189873
SEP_vs_JUL	ko04141	Protein processing in endoplasmic reticulum	32/624	204/5621	0.0261516	0.337628	0.317319	Gj11X52T9/Gj8P32T3/Gj8P349T20/Gj9A1051T96/Gj9A280T133/Gj9E1051T1/Gj9X216T105/Gj9X216T29/Gj9X222T22/MSTRG_10467/MSTRG_10468/MSTRG_10737/MSTRG_10811/MSTRG_2073/MSTRG_3249/MSTRG_4326/MSTRG_4888/MSTRG_5143/MSTRG_5859/MSTRG_5878/MSTRG_7677/MSTRG_7819/MSTRG_8913/MSTRG_9023/MSTRG_9218/Gj11X275T11/Gj1P103T8/Gj5A355T34/Gj9A208T126/MSTRG_10759/MSTRG_4450/MSTRG_9838	32	0.156863
SEP_vs_JUL	ko00966	Glucosinolate biosynthesis	12/624	60/5621	0.0297695	0.337628	0.317319	Gj3A33T42/Gj11P263T6/Gj4P13T7/Gj4P15T18/Gj4P15T9/Gj4P17T12/Gj4P17T21/Gj5P46T6/Gj9A335T40/MSTRG_1339/MSTRG_3192/MSTRG_3534	12	0.2
SEP_vs_JUL	ko00380	Tryptophan metabolism	30/624	191/5621	0.0301453	0.337628	0.317319	Gj1P528T12/Gj2A373T107/Gj3A33T42/Gj7X358T26/Gj9A974T89/MSTRG_10007/MSTRG_2279/MSTRG_315/MSTRG_3225/MSTRG_5538/Gj11A327T121/Gj11P263T6/Gj1A406T23/Gj1P21T18/Gj4P13T7/Gj4P15T18/Gj4P15T9/Gj4P17T12/Gj4P17T21/Gj4P25T8/Gj5P46T6/Gj6A313T64/Gj7A16T41/Gj7A339T84/Gj9A724T165/Gj9A862T103/Gj9P862T14/MSTRG_1339/MSTRG_3192/MSTRG_3534	30	0.157068
SEP_vs_JUL	ko00052	Galactose metabolism	11/624	56/5621	0.0411505	0.418987	0.393785	Gj9A14T102/Gj9A935T79/Gj9A935T83/MSTRG_10643/MSTRG_2773/MSTRG_4334/MSTRG_5275/Gj11A98T27/Gj2A494T18/Gj9P283T25/MSTRG_1536	11	0.196429
SEP_vs_JUL	ko00945	Stilbenoid, diarylheptanoid and gingerol biosynthesis	13/624	71/5621	0.0464865	0.433874	0.407776	Gj7P411T11/Gj2A217T40/Gj3P26T3/Gj5X352T5/Gj6A330T71/Gj6P330T18/Gj6X329T39/Gj7A411T61/Gj9A406T27/Gj9P406T6/Gj9X1057T72/MSTRG_4595/MSTRG_7480	13	0.183099
SEP_vs_JUL	ko00010	Glycolysis / Gluconeogenesis	23/624	150/5621	0.066276	0.515595	0.484582	Gj9A14T102/Gj9A523T22/Gj9A62T83/Gj9A656T84/MSTRG_3614/MSTRG_3997/MSTRG_4007/MSTRG_4955/MSTRG_5275/MSTRG_5296/MSTRG_5538/MSTRG_5776/MSTRG_6395/Gj10P208T11/Gj11P329T5/Gj11P342T9/Gj2A391T89/Gj2A494T18/Gj3P108T10/Gj7A246T80/Gj9A542T106/MSTRG_5232/MSTRG_7421	23	0.153333
SEP_vs_JUL	ko03030	DNA replication	13/624	75/5621	0.0674315	0.515595	0.484582	Gj10A298T143/Gj1A522T77/Gj2P334T13/Gj2P344T11/Gj4A461T77/Gj4A503T86/Gj6A143T26/Gj9A539T70/Gj9A649T67/Gj9P1052T27/Gj9P798T18/MSTRG_1853/MSTRG_6515	13	0.173333
SEP_vs_JUL	ko00030	Pentose phosphate pathway	8/624	40/5621	0.0690529	0.515595	0.484582	Gj9A14T102/MSTRG_10242/MSTRG_3614/MSTRG_5275/MSTRG_6395/Gj3P108T10/Gj7A246T80/Gj9A355T53	8	0.2
SEP_vs_JUL	ko00904	Diterpenoid biosynthesis	12/624	69/5621	0.0753631	0.527542	0.49581	Gj11A100T82/Gj2A374T120/MSTRG_6351/Gj2P338T5/Gj7A376T64/Gj8A307T53/Gj9A393T36/Gj9P172T11/Gj9P384T6/Gj9P973T5/MSTRG_10670/MSTRG_6459	12	0.173913
SEP_vs_JUL	ko04075	Plant hormone signal transduction	39/624	284/5621	0.0908512	0.598549	0.562546	Gj2X399T20/Gj6X336T49/Gj8P6T2/Gj9A817T155/Gj9X287T29/MSTRG_3406/MSTRG_3698/MSTRG_5601/MSTRG_5785/MSTRG_6076/MSTRG_6750/MSTRG_7607/MSTRG_7996/Gj10X271T46/Gj11A278T80/Gj11A370T77/Gj11A418T109/Gj11P278T7/Gj11P326T8/Gj2A136T9/Gj2A458T65/Gj2A458T66/Gj2A459T58/Gj2X354T45/Gj4A93T33/Gj4A94T73/Gj7A400T89/Gj7P400T12/Gj8A153T31/Gj8A279T51/Gj9A123T92/Gj9A667T116/Gj9A994T59/Gj9P862T8/Gj9X147T37/Gj9X645T58/MST…	39	0.137324
SEP_vs_JUL	ko00062	Fatty acid elongation	5/624	24/5621	0.119473	0.678469	0.637659	MSTRG_10347/MSTRG_1831/MSTRG_3049/Gj11A433T101/Gj9A226T92	5	0.208333
SEP_vs_JUL	ko00531	Glycosaminoglycan degradation	5/624	24/5621	0.119473	0.678469	0.637659	Gj11A404T65/Gj2A417T60/Gj2A417T62/Gj9A272T92/Gj9A39T102	5	0.208333
SEP_vs_JUL	ko00061	Fatty acid biosynthesis	6/624	31/5621	0.121979	0.678469	0.637659	MSTRG_610/MSTRG_9434/Gj11A368T72/Gj2P394T11/Gj4P29T10/MSTRG_6900	6	0.193548
SEP_vs_JUL	ko00730	Thiamine metabolism	4/624	18/5621	0.13109	0.678469	0.637659	MSTRG_2805/MSTRG_5666/MSTRG_6252/MSTRG_3690	4	0.222222
SEP_vs_JUL	ko00710	Carbon fixation in photosynthetic organisms	10/624	61/5621	0.133271	0.678469	0.637659	Gj9A656T84/MSTRG_10242/MSTRG_10273/MSTRG_1194/MSTRG_2921/MSTRG_6395/MSTRG_7417/Gj3P108T10/Gj9A297T101/MSTRG_5232	10	0.163934
SEP_vs_JUL	ko00232	Caffeine metabolism	3/624	12/5621	0.140318	0.683285	0.642186	Gj1P528T12/MSTRG_315/Gj1P21T18	3	0.25
SEP_vs_JUL	ko00480	Glutathione metabolism	15/624	105/5621	0.183768	0.836437	0.786125	Gj10P274T22/Gj11A415T151/Gj11A415T157/Gj1A131T68/Gj1A135T35/MSTRG_1721/MSTRG_6563/MSTRG_920/Gj6P39T19/Gj7A407T110/Gj9A679T100/Gj9A71T112/Gj9X778T41/MSTRG_8520/MSTRG_9329	15	0.142857
SEP_vs_JUL	ko00360	Phenylalanine metabolism	11/624	74/5621	0.193334	0.836437	0.786125	Gj7X358T26/MSTRG_3704/MSTRG_7417/MSTRG_8900/Gj9A406T27/Gj9A608T69/Gj9A862T103/Gj9P406T6/Gj9P685T23/Gj9P862T14/MSTRG_10238	11	0.148649
SEP_vs_JUL	ko00941	Flavonoid biosynthesis	12/624	82/5621	0.194173	0.836437	0.786125	MSTRG_8739/Gj10A298T133/Gj2A217T40/Gj3P26T3/Gj5X352T5/Gj6A330T71/Gj6P330T18/Gj6X329T39/Gj9A406T27/Gj9P406T6/Gj9X1057T72/MSTRG_4595	12	0.146341
SEP_vs_JUL	ko01040	Biosynthesis of unsaturated fatty acids	5/624	29/5621	0.213721	0.859092	0.807417	MSTRG_10347/MSTRG_1831/MSTRG_610/Gj11A433T101/Gj4P29T10	5	0.172414
SEP_vs_JUL	ko00591	Linoleic acid metabolism	13/624	92/5621	0.216736	0.859092	0.807417	Gj1P528T12/Gj5A277T51/Gj9P1000T8/MSTRG_2638/MSTRG_315/Gj1A41T66/Gj1P21T18/Gj2A15T48/Gj2A18T57/Gj2P15T11/Gj6A313T64/Gj7A339T84/MSTRG_1910	13	0.141304
SEP_vs_JUL	ko00511	Other glycan degradation	4/624	22/5621	0.222443	0.859092	0.807417	Gj10A289T110/Gj2A417T60/Gj2A417T62/MSTRG_10672	4	0.181818
SEP_vs_JUL	ko00740	Riboflavin metabolism	3/624	16/5621	0.258907	0.929427	0.873521	Gj9A226T95/MSTRG_4462/MSTRG_9598	3	0.1875
SEP_vs_JUL	ko00960	Tropane, piperidine and pyridine alkaloid biosynthesis	7/624	47/5621	0.262288	0.929427	0.873521	Gj6X306T112/Gj6X306T92/MSTRG_7417/Gj2A411T71/Gj4A278T62/Gj9P724T14/Gj9P73T26	7	0.148936
SEP_vs_JUL	ko04016	MAPK signaling pathway - plant	28/624	223/5621	0.269751	0.929427	0.873521	Gj10A285T118/Gj2X399T20/Gj4P423T8/Gj9A1019T81/Gj9X287T29/MSTRG_5601/MSTRG_5785/MSTRG_7607/MSTRG_7996/Gj10X271T46/Gj11A306T84/Gj11P308T7/Gj11X333T27/Gj1P114T0/Gj1X229T4/Gj1X535T5/Gj3P317T21/Gj4X346T10/Gj6X49T17/Gj8A42T39/Gj8P27T1/Gj9A1088T88/Gj9A824T103/Gj9P831T19/MSTRG_1027/MSTRG_2785/MSTRG_7071/MSTRG_7309	28	0.125561
SEP_vs_JUL	ko00071	Fatty acid degradation	10/624	72/5621	0.273849	0.929427	0.873521	Gj9A523T22/MSTRG_3997/MSTRG_4007/MSTRG_4955/MSTRG_5296/MSTRG_5538/MSTRG_9434/Gj10P208T11/Gj2P394T11/MSTRG_7421	10	0.138889
SEP_vs_JUL	ko00603	Glycosphingolipid biosynthesis - globo and isoglobo series	3/624	18/5621	0.322448	1	0.93985	Gj11A98T27/Gj2A417T60/Gj2A417T62	3	0.166667
SEP_vs_JUL	ko00196	Photosynthesis - antenna proteins	2/624	11/5621	0.349514	1	0.93985	MSTRG_4865/MSTRG_5373	2	0.181818
SEP_vs_JUL	ko00051	Fructose and mannose metabolism	7/624	52/5621	0.354568	1	0.93985	Gj9A14T102/MSTRG_5275/MSTRG_5824/MSTRG_6395/Gj3P108T10/Gj7A246T80/MSTRG_1124	7	0.134615
SEP_vs_JUL	ko00130	Ubiquinone and other terpenoid-quinone biosynthesis	7/624	52/5621	0.354568	1	0.93985	MSTRG_3704/MSTRG_8900/Gj4P82T6/Gj9A406T27/Gj9A608T69/Gj9P406T6/Gj9P685T23	7	0.134615
SEP_vs_JUL	ko04145	Phagosome	13/624	104/5621	0.368283	1	0.93985	Gj11A286T32/MSTRG_3262/Gj1A257T29/Gj1A80T113/Gj3P46T2/Gj6A30T37/MSTRG_10709/MSTRG_5245/MSTRG_6958/MSTRG_7718/MSTRG_8369/MSTRG_9838/MSTRG_9954	13	0.125
SEP_vs_JUL	ko00053	Ascorbate and aldarate metabolism	8/624	62/5621	0.382389	1	0.93985	Gj3A329T50/Gj9A1032T104/MSTRG_5538/MSTRG_920/MSTRG_4207/MSTRG_467/MSTRG_473/MSTRG_9329	8	0.129032
SEP_vs_JUL	ko00604	Glycosphingolipid biosynthesis - ganglio series	2/624	12/5621	0.391354	1	0.93985	Gj2A417T60/Gj2A417T62	2	0.166667
SEP_vs_JUL	ko00790	Folate biosynthesis	4/624	29/5621	0.404567	1	0.93985	Gj9A226T95/Gj4A20T84/Gj4A20T88/MSTRG_9598	4	0.137931
SEP_vs_JUL	ko03440	Homologous recombination	9/624	72/5621	0.406123	1	0.93985	Gj2A431T37/Gj4A503T86/Gj6A143T26/Gj9A879T104/Gj9A955T108/Gj9P61T20/Gj9P910T22/MSTRG_400/MSTRG_7069	9	0.125
SEP_vs_JUL	ko00460	Cyanoamino acid metabolism	18/624	151/5621	0.411171	1	0.93985	Gj1P21T15/Gj1P21T16/Gj1P21T17/Gj1P21T18/Gj2A108T21/Gj2A112T27/Gj2A426T32/Gj2A426T34/Gj2A431T35/Gj2P318T17/Gj2P423T6/Gj4A173T59/Gj5A116T47/Gj5P358T8/Gj9A335T40/Gj9A44T104/MSTRG_3864/MSTRG_8230	18	0.119205
SEP_vs_JUL	ko03410	Base excision repair	6/624	48/5621	0.444934	1	0.93985	Gj11A395T73/Gj11A51T48/Gj1A522T79/Gj9A977T101/Gj9P1052T27/Gj9P798T18	6	0.125
SEP_vs_JUL	ko00592	alpha-Linolenic acid metabolism	11/624	92/5621	0.445186	1	0.93985	MSTRG_4955/Gj10P208T11/Gj1A41T66/Gj2A15T48/Gj2A18T57/Gj2P15T11/Gj8A342T87/Gj8A342T91/Gj8A343T89/MSTRG_1910/MSTRG_5395	11	0.119565
SEP_vs_JUL	ko00565	Ether lipid metabolism	3/624	22/5621	0.448154	1	0.93985	Gj2A341T95/Gj9A568T59/Gj9A833T102	3	0.136364
SEP_vs_JUL	ko00901	Indole alkaloid biosynthesis	8/624	66/5621	0.452825	1	0.93985	Gj7X358T26/MSTRG_269/Gj1A490T78/Gj1A533T52/Gj1A90T54/Gj1P89T3/Gj2A35T102/MSTRG_274	8	0.121212
SEP_vs_JUL	ko00350	Tyrosine metabolism	11/624	93/5621	0.459982	1	0.93985	Gj1P47T8/Gj7X358T26/Gj9A523T22/MSTRG_3997/MSTRG_4007/MSTRG_4955/MSTRG_5296/MSTRG_6146/MSTRG_7417/Gj10P208T11/MSTRG_7421	11	0.11828
SEP_vs_JUL	ko00965	Betalain biosynthesis	2/624	14/5621	0.471022	1	0.93985	Gj10A60T31/Gj7X358T26	2	0.142857
SEP_vs_JUL	ko00590	Arachidonic acid metabolism	11/624	96/5621	0.503962	1	0.93985	Gj1P528T12/Gj5A277T51/Gj9P1000T8/MSTRG_2638/MSTRG_315/MSTRG_4894/Gj2A0T68/Gj6A313T64/Gj7A339T84/Gj9A679T100/Gj9A949T59	11	0.114583
SEP_vs_JUL	ko00620	Pyruvate metabolism	10/624	88/5621	0.519374	1	0.93985	Gj9A656T84/MSTRG_10273/MSTRG_2921/MSTRG_4417/MSTRG_5538/MSTRG_5996/Gj11P329T5/Gj11P342T9/Gj9A297T101/MSTRG_5232	10	0.113636
SEP_vs_JUL	ko00400	Phenylalanine, tyrosine and tryptophan biosynthesis	4/624	34/5621	0.531108	1	0.93985	Gj9A1061T111/MSTRG_7417/Gj10A249T91/Gj9X253T28	4	0.117647
SEP_vs_JUL	ko00910	Nitrogen metabolism	3/624	25/5621	0.535995	1	0.93985	Gj9A101T98/Gj9A90T127/Gj9P699T28	3	0.12
SEP_vs_JUL	ko04626	Plant-pathogen interaction	29/624	265/5621	0.563931	1	0.93985	Gj11A40T38/Gj4P423T8/Gj6P40T5/MSTRG_10737/MSTRG_2073/MSTRG_3049/MSTRG_7677/Gj11A306T84/Gj11A322T73/Gj11P308T7/Gj11X333T27/Gj1P114T0/Gj1P510T22/Gj1X229T4/Gj1X535T5/Gj2P394T10/Gj6X49T17/Gj7P255T7/Gj7X256T37/Gj7X374T37/Gj8P56T9/Gj9A1088T88/Gj9A15T87/Gj9A47T78/Gj9P961T28/Gj9X716T21/MSTRG_1571/MSTRG_2785/MSTRG_4984	29	0.109434
SEP_vs_JUL	ko00514	Other types of O-glycan biosynthesis	4/624	37/5621	0.600342	1	0.93985	Gj9A132T82/Gj9P132T18/Gj2A382T100/MSTRG_7865	4	0.108108
SEP_vs_JUL	ko00562	Inositol phosphate metabolism	6/624	57/5621	0.618298	1	0.93985	Gj9A1032T104/MSTRG_9677/Gj2A341T95/Gj3A324T65/Gj9A686T81/Gj9P1055T20	6	0.105263
SEP_vs_JUL	ko00330	Arginine and proline metabolism	7/624	67/5621	0.626262	1	0.93985	MSTRG_5538/MSTRG_7417/MSTRG_8267/MSTRG_8271/MSTRG_9549/Gj9A862T103/Gj9P862T14	7	0.104478
SEP_vs_JUL	ko03420	Nucleotide excision repair	8/624	77/5621	0.633716	1	0.93985	MSTRG_10179/Gj10A298T143/Gj4A503T86/Gj6A143T26/Gj7X352T54/Gj7X353T46/Gj9P1052T27/Gj9P798T18	8	0.103896
SEP_vs_JUL	ko00240	Pyrimidine metabolism	16/624	153/5621	0.640393	1	0.93985	Gj4A30T74/Gj7P372T3/MSTRG_4837/Gj11P329T6/Gj1A525T27/Gj4X124T38/Gj7A165T32/Gj8A348T72/Gj9A195T100/Gj9A4T91/Gj9A539T70/Gj9A979T103/Gj9P798T18/MSTRG_1853/MSTRG_648/MSTRG_8520	16	0.104575
SEP_vs_JUL	ko02010	ABC transporters	7/624	68/5621	0.642173	1	0.93985	MSTRG_8007/Gj1P197T8/Gj4P127T2/Gj6A330T69/Gj7X385T42/Gj9X1039T56/Gj9X111T81	7	0.102941
SEP_vs_JUL	ko00902	Monoterpenoid biosynthesis	3/624	30/5621	0.662862	1	0.93985	Gj11P386T18/Gj2A381T122/MSTRG_4695	3	0.1
SEP_vs_JUL	ko00270	Cysteine and methionine metabolism	9/624	90/5621	0.68129	1	0.93985	Gj6P321T12/MSTRG_5449/MSTRG_6654/MSTRG_7417/MSTRG_8271/Gj10A26T23/Gj5A57T87/Gj7A217T20/Gj9A606T132	9	0.1
SEP_vs_JUL	ko03430	Mismatch repair	6/624	62/5621	0.700098	1	0.93985	Gj10A298T143/Gj1A187T30/Gj4A503T86/Gj6A143T26/Gj9A778T101/Gj9P1052T27	6	0.0967742
SEP_vs_JUL	ko00561	Glycerolipid metabolism	8/624	82/5621	0.704011	1	0.93985	Gj1X424T31/Gj9A62T83/Gj9A651T87/MSTRG_5538/Gj11A98T27/Gj7P183T2/Gj9A937T20/Gj9X937T6	8	0.097561
SEP_vs_JUL	ko04712	Circadian rhythm - plant	3/624	33/5621	0.725913	1	0.93985	MSTRG_4155/MSTRG_615/MSTRG_8739	3	0.0909091
SEP_vs_JUL	ko00660	C5-Branched dibasic acid metabolism	1/624	11/5621	0.72627	1	0.93985	MSTRG_6749	1	0.0909091
SEP_vs_JUL	ko04070	Phosphatidylinositol signaling system	6/624	64/5621	0.729304	1	0.93985	MSTRG_9677/Gj3A324T65/Gj6X49T17/Gj9A686T81/Gj9P1055T20/MSTRG_2785	6	0.09375
SEP_vs_JUL	ko00310	Lysine degradation	5/624	54/5621	0.731227	1	0.93985	MSTRG_5538/MSTRG_6305/Gj1A504T57/Gj4P484T9/Gj9P560T12	5	0.0925926
SEP_vs_JUL	ko00600	Sphingolipid metabolism	2/624	23/5621	0.742056	1	0.93985	Gj11A98T27/Gj9A815T123	2	0.0869565
SEP_vs_JUL	ko00020	Citrate cycle (TCA cycle)	4/624	45/5621	0.75189	1	0.93985	Gj10A256T52/Gj9A656T84/MSTRG_6305/MSTRG_5232	4	0.0888889
SEP_vs_JUL	ko04130	SNARE interactions in vesicular transport	4/624	45/5621	0.75189	1	0.93985	Gj3A333T56/Gj7P378T16/Gj9P48T16/Gj9X870T33	4	0.0888889
SEP_vs_JUL	ko00640	Propanoate metabolism	3/624	37/5621	0.795148	1	0.93985	MSTRG_3721/Gj11P329T5/Gj11P342T9	3	0.0810811
SEP_vs_JUL	ko00073	Cutin, suberine and wax biosynthesis	2/624	26/5621	0.801451	1	0.93985	MSTRG_3099/MSTRG_9161	2	0.0769231
SEP_vs_JUL	ko00780	Biotin metabolism	1/624	14/5621	0.807841	1	0.93985	Gj4P29T10	1	0.0714286
SEP_vs_JUL	ko00950	Isoquinoline alkaloid biosynthesis	3/624	38/5621	0.809988	1	0.93985	Gj1P47T8/Gj7X358T26/MSTRG_7417	3	0.0789474
SEP_vs_JUL	ko00906	Carotenoid biosynthesis	3/624	39/5621	0.823911	1	0.93985	Gj7A60T35/MSTRG_6992/MSTRG_967	3	0.0769231
SEP_vs_JUL	ko03020	RNA polymerase	3/624	40/5621	0.836954	1	0.93985	Gj7P372T3/MSTRG_4837/Gj9A4T91	3	0.075
SEP_vs_JUL	ko00920	Sulfur metabolism	2/624	29/5621	0.848389	1	0.93985	MSTRG_5449/Gj4P2T21	2	0.0689655
SEP_vs_JUL	ko00290	Valine, leucine and isoleucine biosynthesis	1/624	17/5621	0.865131	1	0.93985	MSTRG_6749	1	0.0588235
SEP_vs_JUL	ko00903	Limonene and pinene degradation	1/624	17/5621	0.865131	1	0.93985	MSTRG_5538	1	0.0588235
SEP_vs_JUL	ko04144	Endocytosis	12/624	142/5621	0.878627	1	0.93985	MSTRG_5143/MSTRG_8913/MSTRG_9677/Gj11A328T59/Gj11P381T15/Gj2A397T161/Gj3A343T91/Gj7P375T3/Gj9A568T59/Gj9A833T102/Gj9P625T14/MSTRG_10461	12	0.084507
SEP_vs_JUL	ko00900	Terpenoid backbone biosynthesis	4/624	57/5621	0.891257	1	0.93985	MSTRG_9294/MSTRG_3690/MSTRG_4695/MSTRG_6297	4	0.0701754
SEP_vs_JUL	ko00100	Steroid biosynthesis	2/624	33/5621	0.895279	1	0.93985	Gj7P183T2/Gj9A258T75	2	0.0606061
SEP_vs_JUL	ko00513	Various types of N-glycan biosynthesis	2/624	33/5621	0.895279	1	0.93985	Gj2A417T60/Gj2A417T62	2	0.0606061
SEP_vs_JUL	ko00860	Porphyrin and chlorophyll metabolism	3/624	46/5621	0.898919	1	0.93985	MSTRG_5051/Gj3A327T59/Gj8P47T6	3	0.0652174
SEP_vs_JUL	ko04146	Peroxisome	6/624	82/5621	0.905611	1	0.93985	MSTRG_6879/MSTRG_9434/Gj2A0T68/Gj2P394T11/Gj9A949T59/Gj9P560T12	6	0.0731707
SEP_vs_JUL	ko00190	Oxidative phosphorylation	9/624	117/5621	0.914994	1	0.93985	Gj10A256T52/Gj9P625T17/MSTRG_5296/MSTRG_9997/MSTRG_9998/Gj4P127T2/Gj9A943T82/Gj9P612T17/Gj9P613T4	9	0.0769231
SEP_vs_JUL	ko00230	Purine metabolism	13/624	161/5621	0.919424	1	0.93985	Gj11A90T79/Gj7P372T3/MSTRG_4837/MSTRG_5666/Gj1A525T27/Gj4P2T21/Gj9A4T91/Gj9A539T70/Gj9P578T5/Gj9P798T18/MSTRG_1853/MSTRG_648/MSTRG_8520	13	0.0807453
SEP_vs_JUL	ko00630	Glyoxylate and dicarboxylate metabolism	4/624	62/5621	0.925208	1	0.93985	Gj5A111T51/MSTRG_4417/MSTRG_4676/Gj8A71T50	4	0.0645161
SEP_vs_JUL	ko00650	Butanoate metabolism	1/624	22/5621	0.925274	1	0.93985	MSTRG_6749	1	0.0454545
SEP_vs_JUL	ko00760	Nicotinate and nicotinamide metabolism	1/624	22/5621	0.925274	1	0.93985	Gj5A31T22	1	0.0454545
SEP_vs_JUL	ko00909	Sesquiterpenoid and triterpenoid biosynthesis	5/624	74/5621	0.925559	1	0.93985	Gj4A437T65/Gj4P437T7/Gj9A441T53/MSTRG_455/MSTRG_4695	5	0.0675676
SEP_vs_JUL	ko00564	Glycerophospholipid metabolism	6/624	86/5621	0.927351	1	0.93985	Gj9A651T87/Gj2A341T95/Gj9A568T59/Gj9A833T102/Gj9A937T20/Gj9X937T6	6	0.0697674
SEP_vs_JUL	ko00340	Histidine metabolism	1/624	26/5621	0.953426	1	0.93985	MSTRG_5538	1	0.0384615
SEP_vs_JUL	ko00770	Pantothenate and CoA biosynthesis	1/624	29/5621	0.967338	1	0.93985	MSTRG_6749	1	0.0344828
SEP_vs_JUL	ko03018	RNA degradation	6/624	101/5621	0.974668	1	0.93985	Gj9A14T102/MSTRG_5275/MSTRG_7744/Gj9A51T68/Gj9P910T22/MSTRG_7251	6	0.0594059
SEP_vs_JUL	ko00220	Arginine biosynthesis	1/624	32/5621	0.977099	1	0.93985	MSTRG_7417	1	0.03125
SEP_vs_JUL	ko04136	Autophagy - other	1/624	32/5621	0.977099	1	0.93985	Gj6A319T60	1	0.03125
SEP_vs_JUL	ko00195	Photosynthesis	4/624	77/5621	0.977588	1	0.93985	MSTRG_4705/MSTRG_5054/MSTRG_815/Gj4P127T2	4	0.0519481
SEP_vs_JUL	ko00410	beta-Alanine metabolism	2/624	49/5621	0.978098	1	0.93985	MSTRG_3721/MSTRG_5538	2	0.0408163
SEP_vs_JUL	ko00970	Aminoacyl-tRNA biosynthesis	2/624	51/5621	0.982116	1	0.93985	Gj9A195T107/MSTRG_4889	2	0.0392157
SEP_vs_JUL	ko00280	Valine, leucine and isoleucine degradation	2/624	53/5621	0.985415	1	0.93985	MSTRG_3721/MSTRG_5538	2	0.0377358
SEP_vs_JUL	ko03015	mRNA surveillance pathway	4/624	83/5621	0.986548	1	0.93985	Gj10A256T57/Gj8P36T9/Gj9X194T33/MSTRG_1337	4	0.0481928
SEP_vs_JUL	ko00260	Glycine, serine and threonine metabolism	2/624	55/5621	0.98812	1	0.93985	Gj8A71T50/Gj9P560T12	2	0.0363636
SEP_vs_JUL	ko03060	Protein export	1/624	40/5621	0.991123	1	0.93985	Gj8P32T3	1	0.025
SEP_vs_JUL	ko00250	Alanine, aspartate and glutamate metabolism	1/624	42/5621	0.992997	1	0.93985	MSTRG_7417	1	0.0238095
SEP_vs_JUL	ko03008	Ribosome biogenesis in eukaryotes	3/624	76/5621	0.993093	1	0.93985	Gj10A129T14/Gj2A48T22/MSTRG_7251	3	0.0394737
SEP_vs_JUL	ko03050	Proteasome	1/624	49/5621	0.996949	1	0.93985	Gj9A982T76	1	0.0204082
SEP_vs_JUL	ko04120	Ubiquitin mediated proteolysis	6/624	132/5621	0.997827	1	0.93985	MSTRG_10179/MSTRG_4270/Gj5A283T18/Gj9A1046T94/Gj9P605T14/MSTRG_10759	6	0.0454545
SEP_vs_JUL	ko03040	Spliceosome	7/624	167/5621	0.999636	1	0.93985	Gj7X225T8/MSTRG_4158/MSTRG_5143/MSTRG_6967/MSTRG_8913/Gj5A135T26/Gj8A349T68	7	0.0419162
SEP_vs_JUL	ko03013	Nucleocytoplasmic transport	3/624	158/5621	0.999999	1	0.93985	Gj3P311T8/Gj9A751T47/Gj9A751T48	3	0.0189873
SEP_vs_JUL	ko03010	Ribosome	5/624	309/5621	1	1	0.93985	MSTRG_4767/MSTRG_5105/Gj2P42T9/Gj4A198T10/Gj5X331T56	5	0.0161812
SEP_vs_AUG	ko00040	Pentose and glucuronate interconversions	5/46	153/5621	0.00780426	0.273149	0.271095	MSTRG_3261/Gj1A13T76/Gj2A367T85/Gj2A451T67/Gj9A15T90	5	0.0326797
SEP_vs_AUG	ko00240	Pyrimidine metabolism	4/46	153/5621	0.0355554	0.566901	0.562639	Gj7A64T51/Gj7A73T41/Gj7A73T44/Gj9P938T19	4	0.0261438
SEP_vs_AUG	ko04075	Plant hormone signal transduction	5/46	284/5621	0.0805603	0.566901	0.562639	Gj9A822T71/Gj9X180T57/Gj2A136T9/Gj9P862T8/MSTRG_2430	5	0.0176056
SEP_vs_AUG	ko00901	Indole alkaloid biosynthesis	2/46	66/5621	0.101128	0.566901	0.562639	MSTRG_272/Gj1A533T52	2	0.030303
SEP_vs_AUG	ko04016	MAPK signaling pathway - plant	4/46	223/5621	0.108001	0.566901	0.562639	Gj9X180T57/Gj8P27T1/Gj9A1088T88/Gj9X642T38	4	0.0179372
SEP_vs_AUG	ko00945	Stilbenoid, diarylheptanoid and gingerol biosynthesis	2/46	71/5621	0.114241	0.566901	0.562639	Gj1A515T68/MSTRG_7480	2	0.028169
SEP_vs_AUG	ko00908	Zeatin biosynthesis	2/46	76/5621	0.12777	0.566901	0.562639	MSTRG_763/Gj10A305T63	2	0.0263158
SEP_vs_AUG	ko00940	Phenylpropanoid biosynthesis	6/46	424/5621	0.129577	0.566901	0.562639	Gj1A515T68/MSTRG_1096/Gj1P437T8/Gj7X381T25/Gj9A877T116/MSTRG_4913	6	0.0141509
SEP_vs_AUG	ko00910	Nitrogen metabolism	1/46	25/5621	0.186064	0.655578	0.650649	MSTRG_697	1	0.04
SEP_vs_AUG	ko00073	Cutin, suberine and wax biosynthesis	1/46	26/5621	0.192755	0.655578	0.650649	Gj1A515T68	1	0.0384615
SEP_vs_AUG	ko00100	Steroid biosynthesis	1/46	33/5621	0.238106	0.655578	0.650649	Gj9A258T75	1	0.030303
SEP_vs_AUG	ko04712	Circadian rhythm - plant	1/46	33/5621	0.238106	0.655578	0.650649	MSTRG_2454	1	0.030303
SEP_vs_AUG	ko00640	Propanoate metabolism	1/46	37/5621	0.262892	0.655578	0.650649	MSTRG_3721	1	0.027027
SEP_vs_AUG	ko00030	Pentose phosphate pathway	1/46	40/5621	0.280962	0.655578	0.650649	Gj7A246T80	1	0.025
SEP_vs_AUG	ko03020	RNA polymerase	1/46	40/5621	0.280962	0.655578	0.650649	Gj9P938T19	1	0.025
SEP_vs_AUG	ko00410	beta-Alanine metabolism	1/46	49/5621	0.332611	0.66032	0.655355	MSTRG_3721	1	0.0204082
SEP_vs_AUG	ko00051	Fructose and mannose metabolism	1/46	52/5621	0.349007	0.66032	0.655355	Gj7A246T80	1	0.0192308
SEP_vs_AUG	ko00280	Valine, leucine and isoleucine degradation	1/46	53/5621	0.354384	0.66032	0.655355	MSTRG_3721	1	0.0188679
SEP_vs_AUG	ko00260	Glycine, serine and threonine metabolism	1/46	55/5621	0.365009	0.66032	0.655355	Gj8A71T50	1	0.0181818
SEP_vs_AUG	ko00520	Amino sugar and nucleotide sugar metabolism	2/46	165/5621	0.393175	0.66032	0.655355	MSTRG_1231/MSTRG_4506	2	0.0121212
SEP_vs_AUG	ko00630	Glyoxylate and dicarboxylate metabolism	1/46	62/5621	0.400864	0.66032	0.655355	Gj8A71T50	1	0.016129
SEP_vs_AUG	ko02010	ABC transporters	1/46	68/5621	0.430015	0.66032	0.655355	Gj7X385T42	1	0.0147059
SEP_vs_AUG	ko00904	Diterpenoid biosynthesis	1/46	69/5621	0.434737	0.66032	0.655355	MSTRG_10670	1	0.0144928
SEP_vs_AUG	ko00943	Isoflavonoid biosynthesis	1/46	79/5621	0.479898	0.66032	0.655355	MSTRG_7480	1	0.0126582
SEP_vs_AUG	ko00561	Glycerolipid metabolism	1/46	82/5621	0.492744	0.66032	0.655355	Gj7A401T155	1	0.0121951
SEP_vs_AUG	ko00941	Flavonoid biosynthesis	1/46	82/5621	0.492744	0.66032	0.655355	Gj1A515T68	1	0.0121951
SEP_vs_AUG	ko00564	Glycerophospholipid metabolism	1/46	86/5621	0.50939	0.66032	0.655355	Gj7A401T155	1	0.0116279
SEP_vs_AUG	ko00500	Starch and sucrose metabolism	2/46	234/5621	0.577013	0.678344	0.673243	MSTRG_10513/MSTRG_10517	2	0.00854701
SEP_vs_AUG	ko04145	Phagosome	1/46	104/5621	0.577918	0.678344	0.673243	Gj11A286T32	1	0.00961538
SEP_vs_AUG	ko00480	Glutathione metabolism	1/46	105/5621	0.581437	0.678344	0.673243	Gj7P407T30	1	0.00952381
SEP_vs_AUG	ko04626	Plant-pathogen interaction	2/46	265/5621	0.645881	0.72922	0.723738	MSTRG_4980/Gj9A1088T88	2	0.00754717
SEP_vs_AUG	ko00010	Glycolysis / Gluconeogenesis	1/46	150/5621	0.713292	0.760472	0.754754	Gj7A246T80	1	0.00666667
SEP_vs_AUG	ko03013	Nucleocytoplasmic transport	1/46	158/5621	0.732031	0.760472	0.754754	Gj9A751T49	1	0.00632911
SEP_vs_AUG	ko00230	Purine metabolism	1/46	161/5621	0.738744	0.760472	0.754754	Gj9P938T19	1	0.00621118
SEP_vs_AUG	ko04141	Protein processing in endoplasmic reticulum	1/46	204/5621	0.818677	0.818677	0.812521	Gj9A580T82	1	0.00490196
NOV_vs_JUL	ko00908	Zeatin biosynthesis	30/798	76/5621	4.18999e-08	4.77658e-06	4.45462e-06	Gj10A170T23/Gj4P52T0/Gj4P55T1/Gj4P55T4/Gj4P55T5/Gj4P56T4/Gj4P64T16/Gj7P390T4/Gj7X249T18/Gj9A104T114/MSTRG_3290/MSTRG_3293/Gj10A305T62/Gj11A234T87/Gj11A310T64/Gj11E377T5/Gj11X236T18/Gj1A406T23/Gj4A51T95/Gj4A52T69/Gj4P53T4/Gj4P53T6/Gj7P394T12/Gj9A104T115/Gj9A9T94/Gj9X279T42/Gj9X4T83/MSTRG_10073/MSTRG_3287/MSTRG_3950	30	0.394737
NOV_vs_JUL	ko00040	Pentose and glucuronate interconversions	41/798	153/5621	2.50529e-05	0.00142801	0.00133176	Gj2A367T83/Gj4A36T56/Gj5P355T5/Gj9A62T83/Gj9X152T64/MSTRG_3261/Gj10A223T67/Gj11A111T42/Gj11A19T26/Gj11A432T84/Gj1A13T76/Gj1A20T78/Gj1P176T1/Gj2A367T85/Gj2A451T67/Gj2P367T13/Gj3A10T71/Gj4P507T10/Gj6P281T5/Gj7A33T91/Gj7A34T74/Gj7A401T162/Gj9A137T116/Gj9A754T69/Gj9A90T130/Gj9A92T116/MSTRG_10206/MSTRG_2244/MSTRG_2607/MSTRG_3735/MSTRG_3736/MSTRG_4207/MSTRG_4380/MSTRG_5599/MSTRG_6253/MSTRG_6254/MSTRG_6…	41	0.267974
NOV_vs_JUL	ko00380	Tryptophan metabolism	44/798	191/5621	0.000568728	0.0216117	0.0201549	Gj1P528T12/Gj2A373T107/Gj3A35T106/Gj7X358T26/Gj9A974T89/MSTRG_10007/MSTRG_1342/MSTRG_2279/MSTRG_315/MSTRG_3225/MSTRG_4282/MSTRG_4361/MSTRG_5536/MSTRG_5538/Gj11A234T87/Gj11A327T121/Gj11P263T6/Gj11X236T18/Gj1A406T23/Gj1A94T61/Gj2A307T38/Gj2A307T39/Gj4P13T7/Gj4P15T18/Gj4P15T9/Gj4P16T9/Gj4P17T12/Gj4P17T21/Gj4P25T8/Gj4P387T6/Gj5A357T42/Gj5A46T63/Gj6A313T59/Gj6A314T60/Gj7A16T41/Gj9A317T16/Gj9A724T165/G…	44	0.230366
NOV_vs_JUL	ko00904	Diterpenoid biosynthesis	20/798	69/5621	0.00104358	0.0297419	0.0277372	Gj10P198T7/Gj11A100T82/Gj2A374T120/MSTRG_6351/Gj1A280T10/Gj2P338T5/Gj6A324T103/Gj7A339T83/Gj7A376T64/Gj7P375T12/Gj7P92T2/Gj8A307T53/Gj9A387T47/Gj9A393T36/Gj9P172T11/Gj9P384T6/Gj9P387T5/Gj9P973T5/MSTRG_6459/MSTRG_7500	20	0.289855
NOV_vs_JUL	ko00940	Phenylpropanoid biosynthesis	80/798	424/5621	0.00339318	0.0773645	0.0721497	Gj10P303T18/Gj1P448T9/Gj2P334T9/Gj3P30T3/Gj4A482T70/Gj4P381T5/Gj7A361T86/Gj7A361T88/Gj7A363T38/Gj7P363T2/Gj7X361T66/Gj7X381T25/MSTRG_10149/MSTRG_1096/MSTRG_2761/MSTRG_3656/MSTRG_3704/MSTRG_5536/MSTRG_5538/MSTRG_7122/MSTRG_8218/MSTRG_8900/MSTRG_9924/Gj10A296T124/Gj11A392T102/Gj11P88T6/Gj11X302T4/Gj1A523T86/Gj1P21T15/Gj1P21T16/Gj1P21T17/Gj1P437T9/Gj1P448T8/Gj1X438T57/Gj1X450T45/Gj2A379T86/Gj2A426T3…	80	0.188679
NOV_vs_JUL	ko00500	Starch and sucrose metabolism	48/798	234/5621	0.0044029	0.0836552	0.0780164	Gj2P334T9/Gj4A482T70/Gj4P381T5/Gj8A394T125/Gj9P283T22/MSTRG_10643/MSTRG_135/MSTRG_3682/MSTRG_5307/MSTRG_6062/MSTRG_7672/MSTRG_8703/MSTRG_8762/MSTRG_9910/Gj10A267T119/Gj11P349T10/Gj1P21T15/Gj1P21T16/Gj1P21T17/Gj2A426T32/Gj2A426T34/Gj2A431T35/Gj2P100T2/Gj2P141T7/Gj2P318T17/Gj2P423T6/Gj2P427T3/Gj4A173T59/Gj5A116T47/Gj5A358T102/Gj5P358T8/Gj7A245T60/Gj8A379T53/Gj8A391T80/Gj9A1029T121/Gj9A577T73/Gj9P27…	48	0.205128
NOV_vs_JUL	ko00052	Galactose metabolism	15/798	56/5621	0.0094726	0.154268	0.14387	Gj9A935T83/Gj9P283T22/MSTRG_10643/MSTRG_2773/MSTRG_3585/MSTRG_4251/MSTRG_4334/MSTRG_5275/MSTRG_6493/Gj11A98T27/Gj2A494T18/Gj9P283T25/Gj9P657T11/MSTRG_1536/MSTRG_6400	15	0.267857
NOV_vs_JUL	ko00943	Isoflavonoid biosynthesis	19/798	79/5621	0.0127726	0.18138	0.169154	Gj2A370T89/Gj2P370T20/Gj7P411T11/Gj9P1000T8/MSTRG_2264/MSTRG_2619/MSTRG_315/MSTRG_3225/MSTRG_3867/MSTRG_789/Gj5A118T55/Gj9A1000T72/Gj9A1001T111/Gj9A999T66/Gj9P1001T10/Gj9P1001T6/Gj9P999T10/Gj9P999T16/MSTRG_7480	19	0.240506
NOV_vs_JUL	ko00062	Fatty acid elongation	8/798	24/5621	0.0143195	0.18138	0.169154	Gj9A1039T109/MSTRG_10347/MSTRG_1831/MSTRG_3049/Gj11A433T101/Gj4A137T96/Gj9A226T92/Gj9P1033T14	8	0.333333
NOV_vs_JUL	ko00966	Glucosinolate biosynthesis	14/798	60/5621	0.0381834	0.400456	0.373463	Gj3A35T106/MSTRG_1342/Gj11P263T6/Gj4P13T7/Gj4P15T18/Gj4P15T9/Gj4P16T9/Gj4P17T12/Gj4P17T21/Gj4P387T6/Gj5A46T63/Gj9A335T40/MSTRG_1339/MSTRG_3192	14	0.233333
NOV_vs_JUL	ko04141	Protein processing in endoplasmic reticulum	38/798	204/5621	0.0440921	0.400456	0.373463	Gj11X52T9/Gj4X319T22/Gj5P32T4/Gj8P32T3/Gj9A1051T96/Gj9A280T133/Gj9E1051T1/Gj9X216T105/Gj9X216T29/Gj9X280T111/MSTRG_10467/MSTRG_10468/MSTRG_1055/MSTRG_10811/MSTRG_119/MSTRG_2073/MSTRG_3249/MSTRG_4326/MSTRG_4888/MSTRG_5143/MSTRG_5859/MSTRG_5878/MSTRG_7323/MSTRG_7677/MSTRG_7819/MSTRG_8913/MSTRG_9023/MSTRG_9218/Gj11A308T52/Gj11X275T11/Gj1P103T8/Gj4P10T15/Gj5A77T93/Gj9A1071T122/Gj9A208T126/Gj9A580T82/…	38	0.186275
NOV_vs_JUL	ko00330	Arginine and proline metabolism	15/798	67/5621	0.0454942	0.400456	0.373463	MSTRG_4282/MSTRG_5536/MSTRG_5538/MSTRG_7417/MSTRG_8267/MSTRG_8271/Gj1A94T61/Gj2A307T38/Gj2A307T39/Gj4A487T101/Gj9A73T94/Gj9A862T103/Gj9P862T14/MSTRG_3664/MSTRG_5524	15	0.223881
NOV_vs_JUL	ko00010	Glycolysis / Gluconeogenesis	29/798	150/5621	0.0479312	0.400456	0.373463	Gj9A523T22/Gj9A62T83/Gj9A70T135/MSTRG_3585/MSTRG_3614/MSTRG_3997/MSTRG_4282/MSTRG_4955/MSTRG_5275/MSTRG_5296/MSTRG_5536/MSTRG_5538/MSTRG_5776/MSTRG_6395/MSTRG_8050/Gj10P208T11/Gj11P329T5/Gj11P342T9/Gj2A391T89/Gj2A494T18/Gj5A335T63/Gj7A33T91/Gj7A34T74/Gj9A542T106/Gj9A705T71/Gj9P657T11/MSTRG_3527/MSTRG_3998/MSTRG_7421	29	0.193333
NOV_vs_JUL	ko00905	Brassinosteroid biosynthesis	15/798	68/5621	0.0510383	0.400456	0.373463	Gj1A486T57/Gj1P484T10/Gj9P1000T8/MSTRG_1143/MSTRG_2619/MSTRG_315/MSTRG_491/MSTRG_497/MSTRG_789/Gj11P398T4/Gj7X275T7/Gj9A1000T72/Gj9A1001T111/Gj9P1001T10/Gj9P1001T6	15	0.220588
NOV_vs_JUL	ko00360	Phenylalanine metabolism	16/798	74/5621	0.0526915	0.400456	0.373463	Gj3P320T22/Gj7X358T26/MSTRG_3704/MSTRG_4282/MSTRG_7122/MSTRG_7417/MSTRG_8900/Gj1A94T61/Gj2A307T38/Gj2A307T39/Gj9A406T27/Gj9A608T69/Gj9A862T103/Gj9P406T6/Gj9P862T14/MSTRG_5524	16	0.216216
NOV_vs_JUL	ko00565	Ether lipid metabolism	6/798	22/5621	0.0804558	0.573248	0.534608	Gj2A341T95/Gj2A404T29/Gj9A568T59/Gj9A833T102/MSTRG_3545/MSTRG_3938	6	0.272727
NOV_vs_JUL	ko01040	Biosynthesis of unsaturated fatty acids	7/798	29/5621	0.106325	0.713004	0.664944	Gj5A256T33/MSTRG_10347/MSTRG_1831/MSTRG_3193/Gj11A433T101/Gj4P29T10/Gj9P1033T14	7	0.241379
NOV_vs_JUL	ko00902	Monoterpenoid biosynthesis	7/798	30/5621	0.122619	0.740754	0.690823	Gj11A310T67/Gj11P386T18/Gj1A460T130/Gj2P381T21/Gj2P381T28/MSTRG_2324/MSTRG_4695	7	0.233333
NOV_vs_JUL	ko00520	Amino sugar and nucleotide sugar metabolism	29/798	165/5621	0.126581	0.740754	0.690823	Gj10A285T118/Gj11P368T11/Gj3A329T50/Gj9A1019T81/MSTRG_2814/Gj2A417T60/Gj2A417T62/Gj3A297T86/Gj4P462T1/Gj4X490T72/Gj6A334T76/Gj7P29T1/Gj7P31T2/Gj8A378T66/Gj8A391T80/Gj9P1090T16/Gj9P1090T17/Gj9P657T11/Gj9P803T10/Gj9X388T4/MSTRG_2590/MSTRG_2591/MSTRG_4207/MSTRG_4498/MSTRG_4499/MSTRG_4502/MSTRG_4504/MSTRG_4506/MSTRG_4833	29	0.175758
NOV_vs_JUL	ko00270	Cysteine and methionine metabolism	17/798	90/5621	0.129957	0.740754	0.690823	Gj6P321T12/MSTRG_2357/MSTRG_5449/MSTRG_6654/MSTRG_68/MSTRG_7417/MSTRG_8271/Gj10A26T23/Gj3P305T10/Gj4A487T101/Gj5A57T87/Gj7A217T20/Gj9A606T132/Gj9A917T73/MSTRG_3664/MSTRG_5524/MSTRG_6892	17	0.188889
NOV_vs_JUL	ko00100	Steroid biosynthesis	7/798	33/5621	0.178385	0.931247	0.868476	MSTRG_9547/Gj1P272T1/Gj7P183T2/Gj9A258T75/Gj9A96T68/Gj9MP96T15/MSTRG_474	7	0.212121
NOV_vs_JUL	ko00906	Carotenoid biosynthesis	8/798	39/5621	0.179714	0.931247	0.868476	Gj7A60T35/Gj9A881T92/Gj9P175T15/MSTRG_8209/MSTRG_9242/MSTRG_967/Gj5A357T42/MSTRG_8744	8	0.205128
NOV_vs_JUL	ko04626	Plant-pathogen interaction	43/798	265/5621	0.188257	0.933102	0.870206	Gj11A40T38/Gj11P308T9/Gj1P492T4/Gj4P423T8/Gj5A256T33/Gj6P40T5/Gj6X303T8/MSTRG_2073/MSTRG_3049/MSTRG_765/MSTRG_7677/Gj10A231T121/Gj11A306T84/Gj11A310T68/Gj11A322T73/Gj11P205T1/Gj11P308T7/Gj1P100T0/Gj1P114T0/Gj1P510T22/Gj1P80T8/Gj1X229T4/Gj2P394T10/Gj4A137T96/Gj4A139T41/Gj6A242T54/Gj6X49T17/Gj7P255T7/Gj8A1T110/Gj8P56T9/Gj9A15T87/Gj9A212T106/Gj9A742T143/Gj9A788T105/Gj9A794T71/Gj9P46T14/Gj9P961T28/Gj…	43	0.162264
NOV_vs_JUL	ko00071	Fatty acid degradation	13/798	72/5621	0.214573	0.94112	0.877683	Gj9A523T22/MSTRG_3997/MSTRG_4282/MSTRG_4955/MSTRG_5296/MSTRG_5536/MSTRG_5538/Gj10P208T11/Gj2P394T11/Gj5A335T63/MSTRG_3998/MSTRG_6495/MSTRG_7421	13	0.180556
NOV_vs_JUL	ko00960	Tropane, piperidine and pyridine alkaloid biosynthesis	9/798	47/5621	0.215315	0.94112	0.877683	Gj3P320T22/MSTRG_7417/MSTRG_8979/Gj2A411T71/Gj9P724T14/Gj9P73T26/Gj9P810T21/Gj9P811T23/MSTRG_5524	9	0.191489
NOV_vs_JUL	ko00480	Glutathione metabolism	18/798	105/5621	0.227455	0.94112	0.877683	Gj10P274T22/Gj11A415T151/Gj11A415T156/Gj1A131T68/Gj1A135T35/Gj7A407T112/Gj7P407T28/MSTRG_1721/MSTRG_4148/MSTRG_920/MSTRG_9919/Gj3P338T15/Gj6P39T19/Gj6P39T9/Gj9A679T100/Gj9A71T112/Gj9P311T13/MSTRG_8520	18	0.171429
NOV_vs_JUL	ko00460	Cyanoamino acid metabolism	25/798	151/5621	0.230641	0.94112	0.877683	Gj2P334T9/Gj4A482T70/Gj4P381T5/MSTRG_2357/MSTRG_4135/Gj1P21T15/Gj1P21T16/Gj1P21T17/Gj2A426T32/Gj2A426T34/Gj2A431T35/Gj2P100T2/Gj2P141T7/Gj2P318T17/Gj2P423T6/Gj2P427T3/Gj4A173T59/Gj5A116T47/Gj5A358T102/Gj5P358T8/Gj9A335T40/MSTRG_3864/MSTRG_5675/MSTRG_617/MSTRG_8230	25	0.165563
NOV_vs_JUL	ko00350	Tyrosine metabolism	16/798	93/5621	0.239954	0.94112	0.877683	Gj3P320T22/Gj7X358T26/Gj9A523T22/MSTRG_3997/MSTRG_4282/MSTRG_4955/MSTRG_5296/MSTRG_6146/MSTRG_7417/Gj10P208T11/Gj5A335T63/Gj7A409T56/Gj7P409T5/MSTRG_3998/MSTRG_5524/MSTRG_7421	16	0.172043
NOV_vs_JUL	ko00603	Glycosphingolipid biosynthesis - globo and isoglobo series	4/798	18/5621	0.245984	0.94112	0.877683	MSTRG_4251/Gj11A98T27/Gj2A417T60/Gj2A417T62	4	0.222222
NOV_vs_JUL	ko00531	Glycosaminoglycan degradation	5/798	24/5621	0.247663	0.94112	0.877683	Gj11A404T65/Gj1P477T17/Gj2A417T60/Gj2A417T62/Gj9A272T92	5	0.208333
NOV_vs_JUL	ko03030	DNA replication	13/798	75/5621	0.260805	0.946788	0.882969	Gj1A522T77/Gj4A461T77/Gj4A503T86/Gj6A143T26/Gj9A256T76/Gj9A539T70/Gj9A649T67/Gj9P1052T27/Gj9P798T18/MSTRG_1853/MSTRG_495/MSTRG_6152/MSTRG_6515	13	0.173333
NOV_vs_JUL	ko00514	Other types of O-glycan biosynthesis	7/798	37/5621	0.265765	0.946788	0.882969	Gj9A132T82/Gj9P132T18/Gj2A382T100/Gj9A1083T100/Gj9A1083T98/MSTRG_2330/MSTRG_7865	7	0.189189
NOV_vs_JUL	ko00562	Inositol phosphate metabolism	10/798	57/5621	0.284849	0.969938	0.904559	MSTRG_10019/MSTRG_9677/Gj2A233T16/Gj2A341T95/Gj2A404T29/Gj3A277T24/Gj9A443T77/Gj9A686T81/Gj9P1055T20/MSTRG_3938	10	0.175439
NOV_vs_JUL	ko00950	Isoquinoline alkaloid biosynthesis	7/798	38/5621	0.28928	0.969938	0.904559	Gj3P320T22/Gj7X358T26/MSTRG_7417/Gj7A409T56/Gj7P28T0/Gj7P409T5/MSTRG_5524	7	0.184211
NOV_vs_JUL	ko00030	Pentose phosphate pathway	7/798	40/5621	0.337558	1	0.932595	Gj9A70T135/MSTRG_10242/MSTRG_3585/MSTRG_3614/MSTRG_5275/MSTRG_6230/MSTRG_6395	7	0.175
NOV_vs_JUL	ko04016	MAPK signaling pathway - plant	34/798	223/5621	0.352321	1	0.932595	Gj10A285T118/Gj10X258T19/Gj11P308T9/Gj1P492T4/Gj4P423T8/Gj5A256T33/Gj9A1019T81/Gj9X287T29/MSTRG_291/MSTRG_5785/MSTRG_7607/MSTRG_765/MSTRG_865/Gj11A306T84/Gj11A310T68/Gj11P205T1/Gj11P308T7/Gj1P100T0/Gj1P114T0/Gj1X229T4/Gj4X346T10/Gj6X49T17/Gj8A42T39/Gj9A1077T92/Gj9A158T115/Gj9A788T105/Gj9A824T103/Gj9P831T19/Gj9P915T20/MSTRG_10659/MSTRG_10663/MSTRG_2785/MSTRG_286/MSTRG_7071	34	0.152466
NOV_vs_JUL	ko00561	Glycerolipid metabolism	13/798	82/5621	0.379162	1	0.932595	Gj1X424T31/Gj9A62T83/Gj9A651T87/MSTRG_4251/MSTRG_4282/MSTRG_4463/MSTRG_5536/MSTRG_5538/Gj11A98T27/Gj7A33T91/Gj7A34T74/Gj7P183T2/Gj9X937T6	13	0.158537
NOV_vs_JUL	ko04145	Phagosome	16/798	104/5621	0.405305	1	0.932595	Gj11A286T32/Gj9P667T27/MSTRG_3262/Gj1A257T29/Gj1A80T113/Gj3P46T2/Gj6A30T37/Gj9P21T15/MSTRG_10709/MSTRG_3429/MSTRG_5245/MSTRG_6958/MSTRG_7718/MSTRG_8369/MSTRG_9838/MSTRG_9954	16	0.153846
NOV_vs_JUL	ko00600	Sphingolipid metabolism	4/798	23/5621	0.416307	1	0.932595	MSTRG_4251/Gj11A98T27/Gj1A8T85/Gj9A815T123	4	0.173913
NOV_vs_JUL	ko04070	Phosphatidylinositol signaling system	10/798	64/5621	0.42451	1	0.932595	Gj5A256T33/MSTRG_10019/MSTRG_765/MSTRG_9677/Gj2A233T16/Gj3A277T24/Gj6X49T17/Gj9A686T81/Gj9P1055T20/MSTRG_2785	10	0.15625
NOV_vs_JUL	ko00591	Linoleic acid metabolism	14/798	92/5621	0.433902	1	0.932595	Gj1P528T12/Gj5A277T51/Gj9P1000T8/MSTRG_2638/MSTRG_315/MSTRG_4361/Gj2A15T48/Gj2P15T11/Gj5P338T5/Gj6A313T59/Gj6A314T60/MSTRG_1910/MSTRG_3545/MSTRG_9195	14	0.152174
NOV_vs_JUL	ko00903	Limonene and pinene degradation	3/798	17/5621	0.442034	1	0.932595	MSTRG_4282/MSTRG_5536/MSTRG_5538	3	0.176471
NOV_vs_JUL	ko00051	Fructose and mannose metabolism	8/798	52/5621	0.462446	1	0.932595	Gj5P355T5/Gj9A70T135/MSTRG_3585/MSTRG_5275/MSTRG_5332/MSTRG_6395/Gj8A391T80/Gj9P657T11	8	0.153846
NOV_vs_JUL	ko00901	Indole alkaloid biosynthesis	10/798	66/5621	0.464992	1	0.932595	Gj7X358T26/MSTRG_269/MSTRG_273/Gj1A490T78/Gj1A533T52/Gj1P89T3/Gj6A335T104/Gj9A804T99/Gj9X804T77/MSTRG_274	10	0.151515
NOV_vs_JUL	ko00196	Photosynthesis - antenna proteins	2/798	11/5621	0.476795	1	0.932595	MSTRG_4865/MSTRG_5373	2	0.181818
NOV_vs_JUL	ko00730	Thiamine metabolism	3/798	18/5621	0.481244	1	0.932595	MSTRG_5666/MSTRG_6252/MSTRG_3690	3	0.166667
NOV_vs_JUL	ko00220	Arginine biosynthesis	5/798	32/5621	0.484069	1	0.932595	MSTRG_7417/MSTRG_933/Gj11A196T58/Gj11X149T27/MSTRG_5524	5	0.15625
NOV_vs_JUL	ko00710	Carbon fixation in photosynthetic organisms	9/798	61/5621	0.50608	1	0.932595	Gj9A70T135/MSTRG_10242/MSTRG_10273/MSTRG_1194/MSTRG_2921/MSTRG_6395/MSTRG_7417/Gj9A705T71/MSTRG_5524	9	0.147541
NOV_vs_JUL	ko00310	Lysine degradation	8/798	54/5621	0.507346	1	0.932595	MSTRG_4282/MSTRG_5536/MSTRG_5538/MSTRG_6305/Gj4P484T9/Gj6P17T3/Gj9P560T12/MSTRG_4120	8	0.148148
NOV_vs_JUL	ko00073	Cutin, suberine and wax biosynthesis	4/798	26/5621	0.515371	1	0.932595	Gj3A343T94/Gj3A347T74/MSTRG_3099/MSTRG_7695	4	0.153846
NOV_vs_JUL	ko00232	Caffeine metabolism	2/798	12/5621	0.524803	1	0.932595	Gj1P528T12/MSTRG_315	2	0.166667
NOV_vs_JUL	ko00604	Glycosphingolipid biosynthesis - ganglio series	2/798	12/5621	0.524803	1	0.932595	Gj2A417T60/Gj2A417T62	2	0.166667
NOV_vs_JUL	ko00053	Ascorbate and aldarate metabolism	9/798	62/5621	0.526824	1	0.932595	Gj3A329T50/MSTRG_4282/MSTRG_5536/MSTRG_5538/MSTRG_920/Gj9A443T77/MSTRG_4207/MSTRG_467/MSTRG_473	9	0.145161
NOV_vs_JUL	ko03410	Base excision repair	7/798	48/5621	0.532347	1	0.932595	Gj11A395T73/Gj11A51T48/Gj4P476T12/Gj9A256T76/Gj9A977T101/Gj9P1052T27/Gj9P798T18	7	0.145833
NOV_vs_JUL	ko04144	Endocytosis	20/798	142/5621	0.55302	1	0.932595	Gj11X149T23/MSTRG_233/MSTRG_5143/MSTRG_8188/MSTRG_8913/MSTRG_9677/Gj10P285T22/Gj11A328T59/Gj11P381T15/Gj2A233T16/Gj2A397T161/Gj3A343T91/Gj3A52T63/Gj4A25T91/Gj7P375T3/Gj9A568T59/Gj9A833T102/Gj9P625T14/Gj9P90T20/MSTRG_10461	20	0.140845
NOV_vs_JUL	ko00592	alpha-Linolenic acid metabolism	13/798	92/5621	0.553484	1	0.932595	MSTRG_4955/MSTRG_593/Gj10P208T11/Gj2A15T48/Gj2P15T11/Gj8A342T87/Gj8A342T91/MSTRG_1549/MSTRG_1910/MSTRG_3545/MSTRG_5395/MSTRG_8733/MSTRG_9195	13	0.141304
NOV_vs_JUL	ko00250	Alanine, aspartate and glutamate metabolism	6/798	42/5621	0.560852	1	0.932595	MSTRG_6924/MSTRG_7417/MSTRG_7527/MSTRG_933/MSTRG_5524/MSTRG_6892	6	0.142857
NOV_vs_JUL	ko00945	Stilbenoid, diarylheptanoid and gingerol biosynthesis	10/798	71/5621	0.56318	1	0.932595	Gj7P411T11/Gj3P26T3/Gj5X352T5/Gj6A330T71/Gj6P330T18/Gj6X329T39/Gj9A406T27/Gj9P406T6/MSTRG_4595/MSTRG_7480	10	0.140845
NOV_vs_JUL	ko03440	Homologous recombination	10/798	72/5621	0.581967	1	0.932595	Gj2A431T37/Gj4A503T86/Gj5A94T21/Gj6A143T26/Gj9A955T108/Gj9P61T20/Gj9P910T22/MSTRG_400/MSTRG_6152/MSTRG_7069	10	0.138889
NOV_vs_JUL	ko00790	Folate biosynthesis	4/798	29/5621	0.60589	1	0.932595	Gj9A226T95/MSTRG_10469/Gj4A20T84/Gj4A20T88	4	0.137931
NOV_vs_JUL	ko00965	Betalain biosynthesis	2/798	14/5621	0.611517	1	0.932595	Gj10A60T31/Gj7X358T26	2	0.142857
NOV_vs_JUL	ko00590	Arachidonic acid metabolism	13/798	96/5621	0.6186	1	0.932595	Gj1P528T12/Gj5A277T51/Gj9P1000T8/MSTRG_2638/MSTRG_315/MSTRG_4361/MSTRG_4894/Gj2A0T68/Gj5P338T5/Gj6A313T59/Gj6A314T60/Gj9A679T100/MSTRG_3545	13	0.135417
NOV_vs_JUL	ko00130	Ubiquinone and other terpenoid-quinone biosynthesis	7/798	52/5621	0.621403	1	0.932595	MSTRG_3704/MSTRG_8900/Gj4A84T81/Gj4A87T86/Gj9A406T27/Gj9A608T69/Gj9P406T6	7	0.134615
NOV_vs_JUL	ko00511	Other glycan degradation	3/798	22/5621	0.622831	1	0.932595	Gj2A417T60/Gj2A417T62/MSTRG_10672	3	0.136364
NOV_vs_JUL	ko00260	Glycine, serine and threonine metabolism	7/798	55/5621	0.681613	1	0.932595	Gj3P320T22/MSTRG_4135/MSTRG_7527/Gj8A71T50/Gj9P560T12/MSTRG_6892/MSTRG_9094	7	0.127273
NOV_vs_JUL	ko04712	Circadian rhythm - plant	4/798	33/5621	0.709117	1	0.932595	MSTRG_2454/MSTRG_4155/MSTRG_615/Gj6A63T33	4	0.121212
NOV_vs_JUL	ko00900	Terpenoid backbone biosynthesis	7/798	57/5621	0.718202	1	0.932595	MSTRG_1165/MSTRG_9294/Gj10P303T15/Gj9X56T74/MSTRG_3690/MSTRG_4695/MSTRG_6297	7	0.122807
NOV_vs_JUL	ko00400	Phenylalanine, tyrosine and tryptophan biosynthesis	4/798	34/5621	0.731589	1	0.932595	Gj9A1061T111/MSTRG_7417/Gj10A249T91/MSTRG_5524	4	0.117647
NOV_vs_JUL	ko00340	Histidine metabolism	3/798	26/5621	0.735574	1	0.932595	MSTRG_4282/MSTRG_5536/MSTRG_5538	3	0.115385
NOV_vs_JUL	ko00941	Flavonoid biosynthesis	10/798	82/5621	0.746029	1	0.932595	Gj1A15T70/MSTRG_7191/Gj3P26T3/Gj5X352T5/Gj6A330T71/Gj6P330T18/Gj6X329T39/Gj9A406T27/Gj9P406T6/MSTRG_4595	10	0.121951
NOV_vs_JUL	ko02010	ABC transporters	8/798	68/5621	0.768742	1	0.932595	MSTRG_2136/Gj1P197T8/Gj6A330T69/Gj7X385T42/Gj9A16T107/Gj9X1039T56/Gj9X111T81/Gj9X973T41	8	0.117647
NOV_vs_JUL	ko00195	Photosynthesis	9/798	77/5621	0.783922	1	0.932595	Gj11A407T92/Gj1X511T45/Gj9X488T2/MSTRG_10193/MSTRG_10310/MSTRG_4705/MSTRG_5054/MSTRG_7282/MSTRG_815	9	0.116883
NOV_vs_JUL	ko04075	Plant hormone signal transduction	36/798	284/5621	0.798254	1	0.932595	Gj10X258T19/Gj2P354T13/Gj6X336T49/Gj8P6T2/Gj9A829T57/Gj9X287T29/Gj9X988T61/MSTRG_10080/MSTRG_10805/MSTRG_291/MSTRG_3698/MSTRG_457/MSTRG_5785/MSTRG_6750/MSTRG_7607/MSTRG_865/Gj11A370T77/Gj11P326T8/Gj1P32T11/Gj2A136T9/Gj2A43T57/Gj2A458T65/Gj2A458T66/Gj2X354T45/Gj4A93T33/Gj7P400T12/Gj9A158T115/Gj9A176T58/Gj9A273T69/Gj9A667T116/Gj9A994T59/Gj9X147T37/Gj9X645T58/MSTRG_3705/MSTRG_5855/MSTRG_6586	36	0.126761
NOV_vs_JUL	ko00920	Sulfur metabolism	3/798	29/5621	0.80128	1	0.932595	MSTRG_2357/MSTRG_5449/Gj4P2T21	3	0.103448
NOV_vs_JUL	ko00660	C5-Branched dibasic acid metabolism	1/798	11/5621	0.814717	1	0.932595	MSTRG_6087	1	0.0909091
NOV_vs_JUL	ko00061	Fatty acid biosynthesis	3/798	31/5621	0.83702	1	0.932595	Gj2P394T11/Gj4P29T10/MSTRG_6495	3	0.0967742
NOV_vs_JUL	ko00760	Nicotinate and nicotinamide metabolism	2/798	22/5621	0.840731	1	0.932595	MSTRG_9625/Gj5A31T22	2	0.0909091
NOV_vs_JUL	ko00410	beta-Alanine metabolism	5/798	49/5621	0.84473	1	0.932595	Gj3P320T22/MSTRG_3721/MSTRG_4282/MSTRG_5536/MSTRG_5538	5	0.102041
NOV_vs_JUL	ko00944	Flavone and flavonol biosynthesis	1/798	13/5621	0.863683	1	0.932595	MSTRG_7191	1	0.0769231
NOV_vs_JUL	ko03420	Nucleotide excision repair	8/798	77/5621	0.873442	1	0.932595	Gj4A503T86/Gj6A143T26/Gj7X352T54/Gj7X353T46/Gj9A256T76/Gj9P1052T27/Gj9P798T18/MSTRG_6152	8	0.103896
NOV_vs_JUL	ko00564	Glycerophospholipid metabolism	9/798	86/5621	0.879222	1	0.932595	Gj9A651T87/Gj2A341T95/Gj2A404T29/Gj9A568T59/Gj9A833T102/Gj9P352T5/Gj9X937T6/MSTRG_3545/MSTRG_3938	9	0.104651
NOV_vs_JUL	ko00780	Biotin metabolism	1/798	14/5621	0.883081	1	0.932595	Gj4P29T10	1	0.0714286
NOV_vs_JUL	ko00910	Nitrogen metabolism	2/798	25/5621	0.888788	1	0.932595	MSTRG_933/Gj9A101T98	2	0.08
NOV_vs_JUL	ko00280	Valine, leucine and isoleucine degradation	5/798	53/5621	0.889579	1	0.932595	MSTRG_3721/MSTRG_4282/MSTRG_5536/MSTRG_5538/MSTRG_6892	5	0.0943396
NOV_vs_JUL	ko00630	Glyoxylate and dicarboxylate metabolism	6/798	62/5621	0.891654	1	0.932595	Gj5A111T51/MSTRG_4135/MSTRG_7527/MSTRG_933/Gj8A71T50/MSTRG_9094	6	0.0967742
NOV_vs_JUL	ko00240	Pyrimidine metabolism	17/798	153/5621	0.892979	1	0.932595	Gj2A12T125/MSTRG_4837/Gj11P329T6/Gj1A525T27/Gj7A165T32/Gj8A348T72/Gj9A195T100/Gj9A256T76/Gj9A4T91/Gj9A539T70/Gj9A801T119/Gj9A979T103/Gj9P798T18/Gj9X582T16/MSTRG_1853/MSTRG_648/MSTRG_8520	17	0.111111
NOV_vs_JUL	ko00620	Pyruvate metabolism	9/798	88/5621	0.894908	1	0.932595	MSTRG_10273/MSTRG_2921/MSTRG_4282/MSTRG_5536/MSTRG_5538/MSTRG_5996/MSTRG_8050/Gj11P329T5/Gj11P342T9	9	0.102273
NOV_vs_JUL	ko00860	Porphyrin and chlorophyll metabolism	4/798	46/5621	0.908596	1	0.932595	MSTRG_5051/MSTRG_7760/Gj8P47T6/Gj9A174T87	4	0.0869565
NOV_vs_JUL	ko00640	Propanoate metabolism	3/798	37/5621	0.912874	1	0.932595	MSTRG_3721/Gj11P329T5/Gj11P342T9	3	0.0810811
NOV_vs_JUL	ko00670	One carbon pool by folate	1/798	16/5621	0.913995	1	0.932595	MSTRG_4135	1	0.0625
NOV_vs_JUL	ko00740	Riboflavin metabolism	1/798	16/5621	0.913995	1	0.932595	Gj9A226T95	1	0.0625
NOV_vs_JUL	ko00909	Sesquiterpenoid and triterpenoid biosynthesis	7/798	74/5621	0.916891	1	0.932595	Gj1A27T43/Gj9A360T34/MSTRG_9547/Gj5A48T34/Gj5P338T5/MSTRG_144/MSTRG_4695	7	0.0945946
NOV_vs_JUL	ko00290	Valine, leucine and isoleucine biosynthesis	1/798	17/5621	0.92624	1	0.932595	MSTRG_6087	1	0.0588235
NOV_vs_JUL	ko03020	RNA polymerase	3/798	40/5621	0.937247	1	0.932595	Gj2A12T125/MSTRG_4837/Gj9A4T91	3	0.075
NOV_vs_JUL	ko03430	Mismatch repair	5/798	62/5621	0.951707	1	0.932595	Gj1A187T30/Gj4A503T86/Gj6A143T26/Gj9P1052T27/MSTRG_6152	5	0.0806452
NOV_vs_JUL	ko04136	Autophagy - other	2/798	32/5621	0.95354	1	0.932595	Gj10A240T28/Gj6A319T60	2	0.0625
NOV_vs_JUL	ko00190	Oxidative phosphorylation	11/798	117/5621	0.955464	1	0.932595	Gj10A256T52/Gj9A832T73/Gj9P625T17/MSTRG_10193/MSTRG_5295/MSTRG_5296/MSTRG_7282/MSTRG_8391/MSTRG_9997/Gj2A355T116/Gj9A943T82	11	0.0940171
NOV_vs_JUL	ko00513	Various types of N-glycan biosynthesis	2/798	33/5621	0.959119	1	0.932595	Gj2A417T60/Gj2A417T62	2	0.0606061
NOV_vs_JUL	ko00020	Citrate cycle (TCA cycle)	3/798	45/5621	0.964341	1	0.932595	Gj10A256T52/MSTRG_6305/MSTRG_8050	3	0.0666667
NOV_vs_JUL	ko00650	Butanoate metabolism	1/798	22/5621	0.965793	1	0.932595	MSTRG_6087	1	0.0454545
NOV_vs_JUL	ko03013	Nucleocytoplasmic transport	15/798	158/5621	0.971917	1	0.932595	Gj1X511T37/Gj9A63T83/Gj9A820T113/MSTRG_7579/Gj1A368T6/Gj1A368T7/Gj1X370T1/Gj3P311T8/Gj4A460T68/Gj9A751T47/Gj9A751T48/Gj9P987T12/MSTRG_6032/MSTRG_6313/MSTRG_7399	15	0.0949367
NOV_vs_JUL	ko04120	Ubiquitin mediated proteolysis	12/798	132/5621	0.972052	1	0.932595	Gj5P32T4/Gj6A235T39/MSTRG_1055/MSTRG_187/MSTRG_4270/MSTRG_5969/Gj5A283T18/Gj5A77T93/Gj5X284T3/Gj9A1046T94/Gj9A449T32/Gj9P605T14	12	0.0909091
NOV_vs_JUL	ko03050	Proteasome	3/798	49/5621	0.977631	1	0.932595	Gj9A982T76/MSTRG_3952/MSTRG_8261	3	0.0612245
NOV_vs_JUL	ko04146	Peroxisome	6/798	82/5621	0.982277	1	0.932595	MSTRG_6879/MSTRG_7527/Gj2A0T68/Gj2P394T11/Gj9P560T12/MSTRG_6495	6	0.0731707
NOV_vs_JUL	ko03060	Protein export	2/798	40/5621	0.983592	1	0.932595	Gj8P32T3/MSTRG_7030	2	0.05
NOV_vs_JUL	ko00230	Purine metabolism	14/798	161/5621	0.988136	1	0.932595	Gj11A90T79/Gj2A12T125/Gj2P334T9/MSTRG_4837/MSTRG_5666/Gj1A525T27/Gj4P2T21/Gj9A256T76/Gj9A4T91/Gj9A539T70/Gj9P798T18/MSTRG_1853/MSTRG_648/MSTRG_8520	14	0.0869565
NOV_vs_JUL	ko03008	Ribosome biogenesis in eukaryotes	5/798	76/5621	0.988299	1	0.932595	Gj10A129T14/Gj9A820T113/Gj2A48T22/Gj2A51T18/MSTRG_7251	5	0.0657895
NOV_vs_JUL	ko00770	Pantothenate and CoA biosynthesis	1/798	29/5621	0.988348	1	0.932595	MSTRG_6087	1	0.0344828
NOV_vs_JUL	ko04130	SNARE interactions in vesicular transport	2/798	45/5621	0.991585	1	0.932595	Gj3A333T56/Gj9X870T33	2	0.0444444
NOV_vs_JUL	ko03022	Basal transcription factors	2/798	49/5621	0.995104	1	0.932595	Gj9X1090T29/Gj11X306T45	2	0.0408163
NOV_vs_JUL	ko03018	RNA degradation	6/798	101/5621	0.997518	1	0.932595	MSTRG_3585/MSTRG_5275/Gj9A51T68/Gj9P910T22/MSTRG_6032/MSTRG_7251	6	0.0594059
NOV_vs_JUL	ko03015	mRNA surveillance pathway	4/798	83/5621	0.998503	1	0.932595	Gj10A256T57/MSTRG_1503/MSTRG_1337/MSTRG_6032	4	0.0481928
NOV_vs_JUL	ko03040	Spliceosome	9/798	167/5621	0.999935	1	0.932595	MSTRG_5143/MSTRG_6290/MSTRG_6967/MSTRG_8913/Gj4A460T68/Gj5A135T26/Gj8A349T68/MSTRG_1310/MSTRG_1316	9	0.0538922
NOV_vs_JUL	ko03010	Ribosome	13/798	309/5621	1	1	0.932595	Gj7A165T30/Gj8A356T56/MSTRG_2556/MSTRG_5105/MSTRG_865/Gj2P42T9/Gj4A198T10/Gj5X331T56/Gj8X370T46/MSTRG_2257/MSTRG_7037/MSTRG_8367/MSTRG_9698	13	0.0420712
NOV_vs_AUG	ko00943	Isoflavonoid biosynthesis	13/322	79/5621	0.000476462	0.0250303	0.0222733	Gj1A132T90/Gj1A132T91/Gj2A370T89/Gj3A318T80/Gj7A383T93/MSTRG_2264/MSTRG_3225/MSTRG_3867/MSTRG_789/Gj9A999T66/Gj9P1001T10/Gj9P999T3/MSTRG_7480	13	0.164557
NOV_vs_AUG	ko00940	Phenylpropanoid biosynthesis	41/322	424/5621	0.000516088	0.0250303	0.0222733	Gj1A515T68/Gj1P448T9/Gj2A217T40/Gj2P334T9/Gj4A482T70/Gj4P381T5/Gj5A385T56/Gj7A361T86/Gj7A361T88/Gj7X361T66/MSTRG_10238/MSTRG_10821/MSTRG_1096/MSTRG_3656/MSTRG_5536/MSTRG_5538/MSTRG_5977/MSTRG_6872/MSTRG_7122/MSTRG_8218/MSTRG_8914/MSTRG_9472/Gj10A265T43/Gj11X302T4/Gj2P141T7/Gj2P427T3/Gj2P73T5/Gj3P29T13/Gj3P53T11/Gj5A116T47/Gj5A358T102/Gj5X352T5/Gj7P28T0/Gj8X387T40/Gj9A608T69/Gj9A983T109/MSTRG_130/…	41	0.0966981
NOV_vs_AUG	ko00360	Phenylalanine metabolism	12/322	74/5621	0.00089553	0.0289555	0.0257661	Gj2A309T35/Gj7X358T26/MSTRG_10238/MSTRG_5977/MSTRG_6872/MSTRG_7122/MSTRG_9472/Gj1A94T61/Gj2A307T38/Gj2A307T39/Gj9A608T69/MSTRG_5524	12	0.162162
NOV_vs_AUG	ko00902	Monoterpenoid biosynthesis	7/322	30/5621	0.00122847	0.0297905	0.0265092	Gj11P386T18/Gj1A460T130/Gj2P381T21/Gj2P381T28/MSTRG_2320/MSTRG_2324/MSTRG_4695	7	0.233333
NOV_vs_AUG	ko00380	Tryptophan metabolism	21/322	191/5621	0.00281353	0.0545824	0.0485703	Gj1A132T90/Gj1A132T91/Gj2A309T35/Gj4A390T44/Gj5A357T45/Gj7X358T26/MSTRG_1342/MSTRG_3225/MSTRG_4361/MSTRG_5536/MSTRG_5538/Gj1A94T61/Gj2A307T38/Gj2A307T39/Gj4P14T12/Gj4P16T9/Gj5A355T33/Gj6A313T59/Gj6A314T60/MSTRG_1788/MSTRG_7467	21	0.109948
NOV_vs_AUG	ko00908	Zeatin biosynthesis	11/322	76/5621	0.00368968	0.0593646	0.0528258	Gj10A170T23/Gj4P52T0/Gj4P56T4/MSTRG_3290/Gj11E377T5/Gj4P53T4/Gj7P394T12/Gj9A104T115/Gj9A9T94/MSTRG_10073/MSTRG_3950	11	0.144737
NOV_vs_AUG	ko00330	Arginine and proline metabolism	10/322	67/5621	0.00442702	0.0593646	0.0528258	Gj2A309T35/MSTRG_5536/MSTRG_5538/Gj1A94T61/Gj2A307T38/Gj2A307T39/Gj9A73T94/MSTRG_2541/MSTRG_3664/MSTRG_5524	10	0.149254
NOV_vs_AUG	ko00905	Brassinosteroid biosynthesis	10/322	68/5621	0.00493394	0.0593646	0.0528258	Gj1A132T90/Gj1A132T91/Gj1A486T57/MSTRG_491/MSTRG_497/MSTRG_789/MSTRG_9191/Gj11A399T90/Gj9P1001T10/Gj9P999T3	10	0.147059
NOV_vs_AUG	ko00906	Carotenoid biosynthesis	7/322	39/5621	0.00595745	0.0593646	0.0528258	Gj5A357T45/Gj7A60T35/MSTRG_6992/MSTRG_7229/MSTRG_8209/Gj5A355T33/MSTRG_8744	7	0.179487
NOV_vs_AUG	ko00040	Pentose and glucuronate interconversions	17/322	153/5621	0.00622206	0.0593646	0.0528258	Gj2A367T83/Gj4A36T56/Gj9A275T111/MSTRG_2609/MSTRG_3261/Gj10P293T13/Gj11A432T84/Gj2A367T80/Gj2A367T85/Gj2A451T67/Gj4P507T10/Gj6P18T6/Gj7A33T91/MSTRG_2244/MSTRG_2836/MSTRG_6755/MSTRG_82	17	0.111111
NOV_vs_AUG	ko00945	Stilbenoid, diarylheptanoid and gingerol biosynthesis	10/322	71/5621	0.00673207	0.0593646	0.0528258	Gj1A515T68/Gj2A217T40/Gj5A385T56/Gj7A383T93/MSTRG_6872/MSTRG_8914/MSTRG_9472/Gj2P73T5/Gj5X352T5/MSTRG_7480	10	0.140845
NOV_vs_AUG	ko00100	Steroid biosynthesis	6/322	33/5621	0.010032	0.0810917	0.0721598	MSTRG_9547/Gj1P272T1/Gj9A258T75/Gj9A96T68/Gj9MP96T15/MSTRG_474	6	0.181818
NOV_vs_AUG	ko00500	Starch and sucrose metabolism	22/322	234/5621	0.0141833	0.105829	0.0941726	Gj2P334T9/Gj4A482T70/Gj4P381T5/MSTRG_135/MSTRG_3682/MSTRG_7672/MSTRG_8762/MSTRG_886/Gj2P141T7/Gj2P427T3/Gj5A116T47/Gj5A358T102/Gj8A379T53/Gj9A1029T121/Gj9A1092T71/Gj9P272T16/Gj9P283T25/Gj9P657T11/MSTRG_10517/MSTRG_3765/MSTRG_3864/MSTRG_617	22	0.0940171
NOV_vs_AUG	ko00901	Indole alkaloid biosynthesis	8/322	66/5621	0.0335897	0.232729	0.207095	Gj1A88T18/Gj7X358T26/Gj9X805T31/MSTRG_272/MSTRG_273/Gj1A533T52/Gj6A335T104/MSTRG_274	8	0.121212
NOV_vs_AUG	ko00941	Flavonoid biosynthesis	9/322	82/5621	0.043718	0.28271	0.25157	Gj1A515T68/Gj2A217T40/Gj5A385T56/MSTRG_6872/MSTRG_7191/MSTRG_8914/MSTRG_9472/Gj2P73T5/Gj5X352T5	9	0.109756
NOV_vs_AUG	ko00591	Linoleic acid metabolism	9/322	92/5621	0.0793562	0.481097	0.428106	Gj1A132T90/Gj1A132T91/MSTRG_2638/MSTRG_4361/Gj2P15T11/Gj4P66T17/Gj6A313T59/Gj6A314T60/MSTRG_1910	9	0.0978261
NOV_vs_AUG	ko00310	Lysine degradation	6/322	54/5621	0.0865667	0.48181	0.428741	Gj8P61T16/MSTRG_5536/MSTRG_5538/Gj6P17T3/Gj6X279T18/MSTRG_4120	6	0.111111
NOV_vs_AUG	ko00520	Amino sugar and nucleotide sugar metabolism	14/322	165/5621	0.0894081	0.48181	0.428741	Gj11P368T11/Gj7P29T1/Gj7P30T4/Gj7P31T2/Gj8A378T66/Gj9P657T11/Gj9X388T4/MSTRG_1231/MSTRG_2590/MSTRG_4498/MSTRG_4502/MSTRG_4504/MSTRG_4506/MSTRG_8299	14	0.0848485
NOV_vs_AUG	ko00052	Galactose metabolism	6/322	56/5621	0.0991592	0.506234	0.450474	MSTRG_4121/MSTRG_6493/MSTRG_837/Gj9A935T79/Gj9P283T25/Gj9P657T11	6	0.107143
NOV_vs_AUG	ko00562	Inositol phosphate metabolism	6/322	57/5621	0.1058	0.513132	0.456612	MSTRG_10019/MSTRG_4904/Gj2A233T16/Gj2A404T29/Gj9A443T77/MSTRG_3938	6	0.105263
NOV_vs_AUG	ko00565	Ether lipid metabolism	3/322	22/5621	0.128414	0.593151	0.527817	Gj2A404T29/Gj9A833T102/MSTRG_3938	3	0.136364
NOV_vs_AUG	ko00232	Caffeine metabolism	2/322	12/5621	0.147924	0.622689	0.554102	Gj1A132T90/Gj1A132T91	2	0.166667
NOV_vs_AUG	ko00450	Selenocompound metabolism	2/322	12/5621	0.147924	0.622689	0.554102	MSTRG_3014/MSTRG_5668	2	0.166667
NOV_vs_AUG	ko04070	Phosphatidylinositol signaling system	6/322	64/5621	0.158327	0.622689	0.554102	Gj5A256T33/MSTRG_10019/MSTRG_4904/MSTRG_765/Gj2A233T16/Gj4P152T3	6	0.09375
NOV_vs_AUG	ko00950	Isoquinoline alkaloid biosynthesis	4/322	38/5621	0.170655	0.622689	0.554102	Gj7X358T26/Gj7P28T0/Gj7P409T5/MSTRG_5524	4	0.105263
NOV_vs_AUG	ko00590	Arachidonic acid metabolism	8/322	96/5621	0.183196	0.622689	0.554102	Gj1A132T90/Gj1A132T91/MSTRG_2638/MSTRG_4361/MSTRG_7714/Gj4P66T17/Gj6A313T59/Gj6A314T60	8	0.0833333
NOV_vs_AUG	ko00073	Cutin, suberine and wax biosynthesis	3/322	26/5621	0.184249	0.622689	0.554102	Gj1A515T68/MSTRG_7695/MSTRG_9161	3	0.115385
NOV_vs_AUG	ko00280	Valine, leucine and isoleucine degradation	5/322	53/5621	0.185051	0.622689	0.554102	Gj5A301T32/MSTRG_3721/MSTRG_5536/MSTRG_5538/MSTRG_6758	5	0.0943396
NOV_vs_AUG	ko00561	Glycerolipid metabolism	7/322	82/5621	0.188325	0.622689	0.554102	MSTRG_4463/MSTRG_5536/MSTRG_5538/Gj4P152T3/Gj7A33T91/Gj7A401T155/MSTRG_7173	7	0.0853659
NOV_vs_AUG	ko02010	ABC transporters	6/322	68/5621	0.192584	0.622689	0.554102	Gj9A962T115/Gj9P543T4/MSTRG_2136/Gj10A187T125/Gj7X385T42/Gj9X973T41	6	0.0882353
NOV_vs_AUG	ko00904	Diterpenoid biosynthesis	6/322	69/5621	0.201563	0.630696	0.561227	Gj1A280T10/Gj6A324T103/Gj7A339T83/Gj7P375T12/Gj7P92T2/Gj9P384T6	6	0.0869565
NOV_vs_AUG	ko00564	Glycerophospholipid metabolism	7/322	86/5621	0.221205	0.654937	0.582798	MSTRG_9147/Gj2A404T29/Gj4P152T3/Gj7A401T155/Gj9A833T102/Gj9P352T5/MSTRG_3938	7	0.0813953
NOV_vs_AUG	ko00071	Fatty acid degradation	6/322	72/5621	0.22937	0.654937	0.582798	MSTRG_5536/MSTRG_5538/MSTRG_6758/Gj10P208T11/MSTRG_3998/MSTRG_9434	6	0.0833333
NOV_vs_AUG	ko00920	Sulfur metabolism	3/322	29/5621	0.229566	0.654937	0.582798	MSTRG_2357/MSTRG_3014/Gj4P2T21	3	0.103448
NOV_vs_AUG	ko00010	Glycolysis / Gluconeogenesis	11/322	150/5621	0.239933	0.664958	0.591715	MSTRG_4121/MSTRG_5536/MSTRG_5538/MSTRG_5854/MSTRG_837/Gj10P208T11/Gj3P333T19/Gj7A33T91/Gj9P657T11/MSTRG_3527/MSTRG_3998	11	0.0733333
NOV_vs_AUG	ko00903	Limonene and pinene degradation	2/322	17/5621	0.254176	0.684863	0.609428	MSTRG_5536/MSTRG_5538	2	0.117647
NOV_vs_AUG	ko04075	Plant hormone signal transduction	19/322	284/5621	0.27177	0.699133	0.622126	Gj2P354T13/Gj8P6T2/Gj9A525T8/Gj9A822T71/Gj9P55T13/Gj9X613T14/Gj9X988T61/MSTRG_10805/MSTRG_457/MSTRG_9465/Gj1P32T11/Gj2A136T9/Gj9A158T115/Gj9A176T58/Gj9X147T37/Gj9X864T91/Gj9X966T43/MSTRG_2430/MSTRG_6586	19	0.0669014
NOV_vs_AUG	ko00592	alpha-Linolenic acid metabolism	7/322	92/5621	0.273887	0.699133	0.622126	Gj8A345T66/MSTRG_593/MSTRG_6758/Gj10P208T11/Gj2P15T11/MSTRG_1549/MSTRG_1910	7	0.076087
NOV_vs_AUG	ko00410	beta-Alanine metabolism	4/322	49/5621	0.308007	0.766068	0.681688	MSTRG_3721/MSTRG_5536/MSTRG_5538/MSTRG_2541	4	0.0816327
NOV_vs_AUG	ko00051	Fructose and mannose metabolism	4/322	52/5621	0.347732	0.84325	0.750369	MSTRG_5332/MSTRG_5854/MSTRG_837/Gj9P657T11	4	0.0769231
NOV_vs_AUG	ko00460	Cyanoamino acid metabolism	10/322	151/5621	0.364423	0.862172	0.767207	Gj2P334T9/Gj4A482T70/Gj4P381T5/MSTRG_2357/Gj2P141T7/Gj2P427T3/Gj5A116T47/Gj5A358T102/MSTRG_3864/MSTRG_617	10	0.0662252
NOV_vs_AUG	ko00531	Glycosaminoglycan degradation	2/322	24/5621	0.403513	0.892217	0.793942	MSTRG_1635/Gj1P477T17	2	0.0833333
NOV_vs_AUG	ko00030	Pentose phosphate pathway	3/322	40/5621	0.404156	0.892217	0.793942	MSTRG_5854/MSTRG_6230/MSTRG_837	3	0.075
NOV_vs_AUG	ko00270	Cysteine and methionine metabolism	6/322	90/5621	0.412239	0.892217	0.793942	Gj6P321T12/MSTRG_2357/MSTRG_5668/Gj3P305T10/MSTRG_3664/MSTRG_5524	6	0.0666667
NOV_vs_AUG	ko00900	Terpenoid backbone biosynthesis	4/322	57/5621	0.413915	0.892217	0.793942	MSTRG_6091/MSTRG_909/Gj10P303T15/MSTRG_4695	4	0.0701754
NOV_vs_AUG	ko00910	Nitrogen metabolism	2/322	25/5621	0.423844	0.892698	0.79437	MSTRG_933/MSTRG_697	2	0.08
NOV_vs_AUG	ko00340	Histidine metabolism	2/322	26/5621	0.44381	0.892698	0.79437	MSTRG_5536/MSTRG_5538	2	0.0769231
NOV_vs_AUG	ko00750	Vitamin B6 metabolism	1/322	10/5621	0.445895	0.892698	0.79437	MSTRG_9147	1	0.1
NOV_vs_AUG	ko00966	Glucosinolate biosynthesis	4/322	60/5621	0.452984	0.892698	0.79437	Gj4A390T44/MSTRG_1342/Gj4P14T12/Gj4P16T9	4	0.0666667
NOV_vs_AUG	ko00710	Carbon fixation in photosynthetic organisms	4/322	61/5621	0.465826	0.892698	0.79437	MSTRG_10273/MSTRG_3718/MSTRG_5854/MSTRG_5524	4	0.0655738
NOV_vs_AUG	ko00053	Ascorbate and aldarate metabolism	4/322	62/5621	0.47856	0.892698	0.79437	Gj10A289T101/MSTRG_5536/MSTRG_5538/Gj9A443T77	4	0.0645161
NOV_vs_AUG	ko00630	Glyoxylate and dicarboxylate metabolism	4/322	62/5621	0.47856	0.892698	0.79437	MSTRG_3718/MSTRG_933/Gj8A71T50/MSTRG_9094	4	0.0645161
NOV_vs_AUG	ko00860	Porphyrin and chlorophyll metabolism	3/322	46/5621	0.495624	0.899813	0.800702	MSTRG_5051/MSTRG_7760/Gj9A174T87	3	0.0652174
NOV_vs_AUG	ko01040	Biosynthesis of unsaturated fatty acids	2/322	29/5621	0.501294	0.899813	0.800702	Gj5A256T33/MSTRG_6758	2	0.0689655
NOV_vs_AUG	ko00960	Tropane, piperidine and pyridine alkaloid biosynthesis	3/322	47/5621	0.510203	0.899813	0.800702	MSTRG_8979/Gj9P810T21/MSTRG_5524	3	0.0638298
NOV_vs_AUG	ko00944	Flavone and flavonol biosynthesis	1/322	13/5621	0.535936	0.928318	0.826067	MSTRG_7191	1	0.0769231
NOV_vs_AUG	ko00220	Arginine biosynthesis	2/322	32/5621	0.554824	0.93532	0.832298	MSTRG_933/MSTRG_5524	2	0.0625
NOV_vs_AUG	ko00965	Betalain biosynthesis	1/322	14/5621	0.562582	0.93532	0.832298	Gj7X358T26	1	0.0714286
NOV_vs_AUG	ko04712	Circadian rhythm - plant	2/322	33/5621	0.571743	0.93532	0.832298	MSTRG_2454/MSTRG_4155	2	0.0606061
NOV_vs_AUG	ko00130	Ubiquinone and other terpenoid-quinone biosynthesis	3/322	52/5621	0.579571	0.93532	0.832298	MSTRG_6872/Gj4A87T86/Gj9A608T69	3	0.0576923
NOV_vs_AUG	ko00400	Phenylalanine, tyrosine and tryptophan biosynthesis	2/322	34/5621	0.588191	0.93532	0.832298	Gj9A699T127/MSTRG_5524	2	0.0588235
NOV_vs_AUG	ko00260	Glycine, serine and threonine metabolism	3/322	55/5621	0.618108	0.959471	0.853788	MSTRG_4516/Gj8A71T50/MSTRG_9094	3	0.0545455
NOV_vs_AUG	ko00350	Tyrosine metabolism	5/322	93/5621	0.623161	0.959471	0.853788	Gj7X358T26/Gj10P208T11/Gj7P409T5/MSTRG_3998/MSTRG_5524	5	0.0537634
NOV_vs_AUG	ko00730	Thiamine metabolism	1/322	18/5621	0.654756	0.992067	0.882794	MSTRG_909	1	0.0555556
NOV_vs_AUG	ko04626	Plant-pathogen interaction	14/322	265/5621	0.664787	0.992067	0.882794	Gj2P371T14/Gj5A256T33/Gj6P280T16/Gj6P40T5/Gj6X303T8/MSTRG_4980/MSTRG_765/Gj10A231T121/Gj1P100T0/Gj4A137T96/Gj9A212T106/Gj9A794T71/Gj9P46T14/MSTRG_1405	14	0.0528302
NOV_vs_AUG	ko04146	Peroxisome	4/322	82/5621	0.699733	0.99977	0.889649	Gj5A301T32/MSTRG_6758/Gj9X1073T39/MSTRG_9434	4	0.0487805
NOV_vs_AUG	ko00250	Alanine, aspartate and glutamate metabolism	2/322	42/5621	0.702948	0.99977	0.889649	MSTRG_933/MSTRG_5524	2	0.047619
NOV_vs_AUG	ko00230	Purine metabolism	8/322	161/5621	0.712441	0.99977	0.889649	Gj2P334T9/Gj9P816T14/MSTRG_3014/Gj1A525T27/Gj3P333T19/Gj4P2T21/Gj9P938T19/MSTRG_648	8	0.0496894
NOV_vs_AUG	ko00480	Glutathione metabolism	5/322	105/5621	0.727359	0.99977	0.889649	Gj10A289T101/Gj7P407T28/MSTRG_7714/Gj3P338T15/Gj9A202T94	5	0.047619
NOV_vs_AUG	ko00650	Butanoate metabolism	1/322	22/5621	0.727554	0.99977	0.889649	Gj5A301T32	1	0.0454545
NOV_vs_AUG	ko00600	Sphingolipid metabolism	1/322	23/5621	0.743223	0.99977	0.889649	Gj1A8T85	1	0.0434783
NOV_vs_AUG	ko00620	Pyruvate metabolism	4/322	88/5621	0.751184	0.99977	0.889649	MSTRG_10273/MSTRG_5536/MSTRG_5538/Gj3P333T19	4	0.0454545
NOV_vs_AUG	ko00062	Fatty acid elongation	1/322	24/5621	0.757993	0.99977	0.889649	Gj4A137T96	1	0.0416667
NOV_vs_AUG	ko00909	Sesquiterpenoid and triterpenoid biosynthesis	3/322	74/5621	0.805262	0.99977	0.889649	MSTRG_9547/Gj4P66T17/MSTRG_4695	3	0.0405405
NOV_vs_AUG	ko00061	Fatty acid biosynthesis	1/322	31/5621	0.840192	0.99977	0.889649	MSTRG_9434	1	0.0322581
NOV_vs_AUG	ko03015	mRNA surveillance pathway	3/322	83/5621	0.862854	0.99977	0.889649	MSTRG_1503/Gj9A183T84/MSTRG_6032	3	0.0361446
NOV_vs_AUG	ko00514	Other types of O-glycan biosynthesis	1/322	37/5621	0.888074	0.99977	0.889649	Gj9A1083T98	1	0.027027
NOV_vs_AUG	ko00640	Propanoate metabolism	1/322	37/5621	0.888074	0.99977	0.889649	MSTRG_3721	1	0.027027
NOV_vs_AUG	ko03020	RNA polymerase	1/322	40/5621	0.906344	0.99977	0.889649	Gj9P938T19	1	0.025
NOV_vs_AUG	ko03060	Protein export	1/322	40/5621	0.906344	0.99977	0.889649	Gj3X329T22	1	0.025
NOV_vs_AUG	ko04144	Endocytosis	5/322	142/5621	0.916921	0.99977	0.889649	Gj1A80T111/Gj2A233T16/Gj3A52T63/Gj4A25T91/Gj9A833T102	5	0.0352113
NOV_vs_AUG	ko03440	Homologous recombination	2/322	72/5621	0.924414	0.99977	0.889649	Gj9P620T7/MSTRG_6152	2	0.0277778
NOV_vs_AUG	ko04130	SNARE interactions in vesicular transport	1/322	45/5621	0.930427	0.99977	0.889649	Gj6A295T72	1	0.0222222
NOV_vs_AUG	ko03018	RNA degradation	3/322	101/5621	0.935034	0.99977	0.889649	MSTRG_837/MSTRG_6032/MSTRG_7744	3	0.029703
NOV_vs_AUG	ko04145	Phagosome	3/322	104/5621	0.94293	0.99977	0.889649	Gj11A286T32/Gj9P667T27/MSTRG_3262	3	0.0288462
NOV_vs_AUG	ko00240	Pyrimidine metabolism	5/322	153/5621	0.944191	0.99977	0.889649	Gj7A64T51/Gj1A525T27/Gj9P938T19/Gj9X582T16/MSTRG_648	5	0.0326797
NOV_vs_AUG	ko03022	Basal transcription factors	1/322	49/5621	0.945162	0.99977	0.889649	Gj11X306T45	1	0.0204082
NOV_vs_AUG	ko04016	MAPK signaling pathway - plant	8/322	223/5621	0.947875	0.99977	0.889649	Gj5A256T33/Gj9A525T8/MSTRG_765/Gj1P100T0/Gj9A1077T92/Gj9A158T115/MSTRG_10659/MSTRG_10663	8	0.0358744
NOV_vs_AUG	ko03430	Mismatch repair	1/322	62/5621	0.974728	0.99977	0.889649	MSTRG_6152	1	0.016129
NOV_vs_AUG	ko04141	Protein processing in endoplasmic reticulum	6/322	204/5621	0.979849	0.99977	0.889649	MSTRG_119/Gj11A308T52/Gj4P10T15/Gj9A580T82/MSTRG_4791/MSTRG_4868	6	0.0294118
NOV_vs_AUG	ko03013	Nucleocytoplasmic transport	4/322	158/5621	0.983113	0.99977	0.889649	Gj1A368T6/Gj1X370T1/Gj9P987T12/MSTRG_6032	4	0.0253165
NOV_vs_AUG	ko03030	DNA replication	1/322	75/5621	0.988375	0.99977	0.889649	MSTRG_6152	1	0.0133333
NOV_vs_AUG	ko03008	Ribosome biogenesis in eukaryotes	1/322	76/5621	0.98905	0.99977	0.889649	Gj2A48T22	1	0.0131579
NOV_vs_AUG	ko00195	Photosynthesis	1/322	77/5621	0.989686	0.99977	0.889649	Gj11A407T92	1	0.012987
NOV_vs_AUG	ko03420	Nucleotide excision repair	1/322	77/5621	0.989686	0.99977	0.889649	MSTRG_6152	1	0.012987
NOV_vs_AUG	ko04120	Ubiquitin mediated proteolysis	2/322	132/5621	0.996518	0.99977	0.889649	Gj9P605T14/MSTRG_4791	2	0.0151515
NOV_vs_AUG	ko03010	Ribosome	6/322	309/5621	0.99977	0.99977	0.889649	Gj7A165T30/Gj9P291T3/MSTRG_4904/Gj8X370T46/Gj9P135T24/MSTRG_2257	6	0.0194175
NOV_vs_SEP	ko00940	Phenylpropanoid biosynthesis	18/87	424/5621	6.42076e-05	0.00327459	0.003109	Gj1P21T18/Gj4A482T70/Gj4P381T5/Gj5P368T9/Gj7A361T86/Gj7A361T88/Gj7X361T66/Gj7X381T25/MSTRG_8218/MSTRG_9054/Gj2A379T86/Gj2P379T10/Gj3P53T11/Gj5A358T102/Gj8X387T40/MSTRG_130/MSTRG_208/MSTRG_617	18	0.0424528
NOV_vs_SEP	ko00500	Starch and sucrose metabolism	10/87	234/5621	0.00307992	0.078538	0.0745665	Gj1P21T18/Gj4A482T70/Gj4P381T5/Gj5P368T9/MSTRG_7672/Gj5A358T102/Gj9P272T16/Gj9P283T25/MSTRG_3765/MSTRG_617	10	0.042735
NOV_vs_SEP	ko00073	Cutin, suberine and wax biosynthesis	3/87	26/5621	0.00720014	0.116434	0.110547	MSTRG_10286/MSTRG_7695/MSTRG_9161	3	0.115385
NOV_vs_SEP	ko00040	Pentose and glucuronate interconversions	7/87	153/5621	0.00913211	0.116434	0.110547	Gj11A425T108/Gj2A367T83/Gj4A36T56/MSTRG_2609/MSTRG_3261/Gj11A432T84/Gj2A367T80	7	0.0457516
NOV_vs_SEP	ko00460	Cyanoamino acid metabolism	6/87	151/5621	0.0288766	0.294542	0.279647	Gj1P21T18/Gj4A482T70/Gj4P381T5/Gj5P368T9/Gj5A358T102/MSTRG_617	6	0.0397351
NOV_vs_SEP	ko00380	Tryptophan metabolism	6/87	191/5621	0.074547	0.5136	0.487629	Gj1P21T18/Gj1A94T61/Gj2A307T39/Gj6A313T59/Gj6A314T60/MSTRG_1788	6	0.0314136
NOV_vs_SEP	ko00901	Indole alkaloid biosynthesis	3/87	66/5621	0.0817602	0.5136	0.487629	Gj6A335T104/Gj9A804T99/MSTRG_274	3	0.0454545
NOV_vs_SEP	ko00330	Arginine and proline metabolism	3/87	67/5621	0.0846746	0.5136	0.487629	Gj1A94T61/Gj2A307T39/Gj9A73T94	3	0.0447761
NOV_vs_SEP	ko00904	Diterpenoid biosynthesis	3/87	69/5621	0.0906354	0.5136	0.487629	MSTRG_10670/Gj1A280T10/Gj6A324T103	3	0.0434783
NOV_vs_SEP	ko00591	Linoleic acid metabolism	3/87	92/5621	0.170004	0.740714	0.703258	Gj1P21T18/Gj6A313T59/Gj6A314T60	3	0.0326087
NOV_vs_SEP	ko00232	Caffeine metabolism	1/87	12/5621	0.170863	0.740714	0.703258	Gj1P21T18	1	0.0833333
NOV_vs_SEP	ko04144	Endocytosis	4/87	142/5621	0.176897	0.740714	0.703258	Gj1A80T111/Gj2A233T16/Gj3A52T63/Gj4A25T91	4	0.028169
NOV_vs_SEP	ko00051	Fructose and mannose metabolism	2/87	52/5621	0.192031	0.740714	0.703258	Gj8A395T113/MSTRG_5332	2	0.0384615
NOV_vs_SEP	ko00310	Lysine degradation	2/87	54/5621	0.203333	0.740714	0.703258	Gj6P17T3/MSTRG_4120	2	0.037037
NOV_vs_SEP	ko00562	Inositol phosphate metabolism	2/87	57/5621	0.220422	0.749436	0.711539	Gj2A233T16/Gj9A443T77	2	0.0350877
NOV_vs_SEP	ko00905	Brassinosteroid biosynthesis	2/87	68/5621	0.283763	0.840692	0.79818	Gj9A833T108/Gj11A399T90	2	0.0294118
NOV_vs_SEP	ko00360	Phenylalanine metabolism	2/87	74/5621	0.318257	0.840692	0.79818	Gj1A94T61/Gj2A307T39	2	0.027027
NOV_vs_SEP	ko00909	Sesquiterpenoid and triterpenoid biosynthesis	2/87	74/5621	0.318257	0.840692	0.79818	Gj9A360T34/Gj9A441T53	2	0.027027
NOV_vs_SEP	ko03030	DNA replication	2/87	75/5621	0.323976	0.840692	0.79818	Gj1A475T70/MSTRG_6152	2	0.0266667
NOV_vs_SEP	ko00908	Zeatin biosynthesis	2/87	76/5621	0.329683	0.840692	0.79818	MSTRG_10073/MSTRG_763	2	0.0263158
NOV_vs_SEP	ko01040	Biosynthesis of unsaturated fatty acids	1/87	29/5621	0.364601	0.866666	0.822841	MSTRG_3199	1	0.0344828
NOV_vs_SEP	ko00061	Fatty acid biosynthesis	1/87	31/5621	0.38422	0.866666	0.822841	MSTRG_9434	1	0.0322581
NOV_vs_SEP	ko00514	Other types of O-glycan biosynthesis	1/87	37/5621	0.439554	0.866666	0.822841	Gj9A1083T98	1	0.027027
NOV_vs_SEP	ko00590	Arachidonic acid metabolism	2/87	96/5621	0.440077	0.866666	0.822841	Gj6A313T59/Gj6A314T60	2	0.0208333
NOV_vs_SEP	ko04016	MAPK signaling pathway - plant	4/87	223/5621	0.455561	0.866666	0.822841	Gj8P27T1/Gj9A552T71/MSTRG_10659/MSTRG_10663	4	0.0179372
NOV_vs_SEP	ko00906	Carotenoid biosynthesis	1/87	39/5621	0.456884	0.866666	0.822841	MSTRG_8744	1	0.025641
NOV_vs_SEP	ko03018	RNA degradation	2/87	101/5621	0.466193	0.866666	0.822841	MSTRG_6032/MSTRG_7744	2	0.019802
NOV_vs_SEP	ko04130	SNARE interactions in vesicular transport	1/87	45/5621	0.505756	0.866666	0.822841	Gj6A295T72	1	0.0222222
NOV_vs_SEP	ko00960	Tropane, piperidine and pyridine alkaloid biosynthesis	1/87	47/5621	0.52106	0.866666	0.822841	Gj9P810T21	1	0.0212766
NOV_vs_SEP	ko00260	Glycine, serine and threonine metabolism	1/87	55/5621	0.57773	0.866666	0.822841	MSTRG_9094	1	0.0181818
NOV_vs_SEP	ko00052	Galactose metabolism	1/87	56/5621	0.58433	0.866666	0.822841	Gj9P283T25	1	0.0178571
NOV_vs_SEP	ko00900	Terpenoid backbone biosynthesis	1/87	57/5621	0.590828	0.866666	0.822841	Gj10P303T15	1	0.0175439
NOV_vs_SEP	ko00053	Ascorbate and aldarate metabolism	1/87	62/5621	0.621844	0.866666	0.822841	Gj9A443T77	1	0.016129
NOV_vs_SEP	ko00630	Glyoxylate and dicarboxylate metabolism	1/87	62/5621	0.621844	0.866666	0.822841	MSTRG_9094	1	0.016129
NOV_vs_SEP	ko03430	Mismatch repair	1/87	62/5621	0.621844	0.866666	0.822841	MSTRG_6152	1	0.016129
NOV_vs_SEP	ko04070	Phosphatidylinositol signaling system	1/87	64/5621	0.633589	0.866666	0.822841	Gj2A233T16	1	0.015625
NOV_vs_SEP	ko00071	Fatty acid degradation	1/87	72/5621	0.677069	0.866666	0.822841	MSTRG_9434	1	0.0138889
NOV_vs_SEP	ko03440	Homologous recombination	1/87	72/5621	0.677069	0.866666	0.822841	MSTRG_6152	1	0.0138889
NOV_vs_SEP	ko00240	Pyrimidine metabolism	2/87	153/5621	0.69107	0.866666	0.822841	Gj1A525T27/Gj9X582T16	2	0.0130719
NOV_vs_SEP	ko03420	Nucleotide excision repair	1/87	77/5621	0.701612	0.866666	0.822841	MSTRG_6152	1	0.012987
NOV_vs_SEP	ko04146	Peroxisome	1/87	82/5621	0.724309	0.866666	0.822841	MSTRG_9434	1	0.0121951
NOV_vs_SEP	ko03015	mRNA surveillance pathway	1/87	83/5621	0.728639	0.866666	0.822841	MSTRG_6032	1	0.0120482
NOV_vs_SEP	ko00564	Glycerophospholipid metabolism	1/87	86/5621	0.74123	0.866666	0.822841	MSTRG_6336	1	0.0116279
NOV_vs_SEP	ko00270	Cysteine and methionine metabolism	1/87	90/5621	0.757124	0.866666	0.822841	Gj8A71T53	1	0.0111111
NOV_vs_SEP	ko00592	alpha-Linolenic acid metabolism	1/87	92/5621	0.764706	0.866666	0.822841	MSTRG_593	1	0.0108696
NOV_vs_SEP	ko04626	Plant-pathogen interaction	3/87	265/5621	0.785684	0.871084	0.827035	Gj6X303T8/Gj9A552T71/Gj9P46T14	3	0.0113208
NOV_vs_SEP	ko04075	Plant hormone signal transduction	3/87	284/5621	0.823866	0.893982	0.848775	Gj11A382T122/Gj2P354T13/Gj9P862T8	3	0.0105634
NOV_vs_SEP	ko03013	Nucleocytoplasmic transport	1/87	158/5621	0.917911	0.945174	0.897379	MSTRG_6032	1	0.00632911
NOV_vs_SEP	ko00230	Purine metabolism	1/87	161/5621	0.921771	0.945174	0.897379	Gj1A525T27	1	0.00621118
NOV_vs_SEP	ko00520	Amino sugar and nucleotide sugar metabolism	1/87	165/5621	0.926641	0.945174	0.897379	Gj8A378T66	1	0.00606061
NOV_vs_SEP	ko04141	Protein processing in endoplasmic reticulum	1/87	204/5621	0.960895	0.960895	0.912304	Gj11A308T52	1	0.00490196
