# Supplementary material for: Integrated SMRT and Illumina Sequencing Provide New Insights into Crocin Biosynthesis of Gardenia jasminoides
Source: Int J Mol Sci. 2022 Jun 5;23(11):6321. doi: 10.3390/ijms23116321 (PMC9181021; doi:10.3390/ijms23116321)
Supplement: Supplementary file 1 [file ijms-23-06321-s001.zip › Table S7.xlsx]

## Sheet: Table S7 AUG vs JUL
Name	AUG	JUL	BaseMean	log2FC	lfcSE	Stat	Pvalue	FDR	Threshold
MSTRG_10163	134.971	6.25642	46.3211	4.45425	0.841523	5.29308	1.20273e-07	6.62842e-06	Up
MSTRG_10242	31.7675	2.61967	38.4366	3.59677	0.853465	4.21432	2.50537e-05	0.000673191	Up
MSTRG_1117	5903.86	455.415	17751.9	3.69647	0.795605	4.64611	3.38255e-06	0.000122665	Up
MSTRG_124	203.262	11.0362	173.194	4.20795	1.09825	3.83151	0.000127361	0.00259632	Up
MSTRG_162	396.846	39.0409	300.506	3.34865	0.936686	3.57499	0.000350235	0.00590009	Up
MSTRG_1929	756.766	8.16008	732.044	6.54009	0.959265	6.81781	9.24371e-12	1.18684e-09	Up
MSTRG_2198	1.50178	0	81.8193	15.9768	4.29813	3.71715	0.000201486	0.00375365	Up
MSTRG_2302	37.5288	3.16626	34.7533	3.56093	1.06957	3.3293	0.000870634	0.0123317	Up
MSTRG_2389	57.6798	10.6645	250.002	2.43782	0.746869	3.26406	0.00109829	0.0146478	Up
MSTRG_3006	135.754	28.7033	710.626	2.24329	0.646409	3.47039	0.000519707	0.0081268	Up
MSTRG_3074	13284	432.329	5441.49	4.94149	1.64379	3.00617	0.00264563	0.0292422	Up
MSTRG_3254	1874.32	17.4906	1792.03	6.74616	1.1724	5.75412	8.70922e-09	6.24985e-07	Up
MSTRG_3315	2210.04	168.579	2092.43	3.71204	0.677685	5.47753	4.31308e-08	2.65411e-06	Up
MSTRG_3508	44.5766	0	26.9624	8.0941	1.9611	4.12732	3.67022e-05	0.000923503	Up
MSTRG_3715	69.0862	1.27433	103.009	5.82293	1.14892	5.06817	4.01656e-07	1.91577e-05	Up
MSTRG_3797	37.9576	1.78137	38.6437	4.31846	1.03284	4.18116	2.90019e-05	0.000761197	Up
MSTRG_4426	11.736	0	14.411	6.17128	1.61613	3.81856	0.000134234	0.00271128	Up
MSTRG_4476	9.94915	2.34754	15.617	2.07165	0.731071	2.83372	0.004601	0.0440675	Up
MSTRG_4539	561.752	7.42958	497.461	6.25166	0.951874	6.56774	5.10855e-11	5.67025e-09	Up
MSTRG_4787	379.578	6.46735	524.434	5.88434	1.05364	5.5848	2.3397e-08	1.52678e-06	Up
MSTRG_5126	3680.29	135.128	2484.94	4.76811	0.935016	5.09949	3.40566e-07	1.65768e-05	Up
MSTRG_5377	73.8526	6.77284	180.181	3.44739	1.00513	3.42979	0.000604058	0.00921527	Up
MSTRG_5604	14.9931	2.03778	13.5884	2.86536	0.962375	2.97738	0.00290723	0.0312751	Up
MSTRG_5686	5635.65	236.711	13142.4	4.57367	0.853442	5.35909	8.36443e-08	4.79904e-06	Up
MSTRG_580	530.337	85.5864	377.873	2.63325	0.783294	3.36176	0.000774476	0.0112172	Up
MSTRG_5824	80.0506	12.3991	46.849	2.69667	0.841019	3.20643	0.00134394	0.017172	Up
MSTRG_5864	254.341	15.4042	585.507	4.04621	0.993191	4.07395	4.62228e-05	0.00112493	Up
MSTRG_6076	999.737	78.5114	995.192	3.67216	0.698034	5.26071	1.43498e-07	7.75673e-06	Up
MSTRG_6115	45.6126	7.40724	19.5438	2.63401	0.915262	2.87788	0.00400358	0.0395133	Up
MSTRG_6224	10.8644	1.25669	46.444	3.19614	1.06359	3.00505	0.00265539	0.0293092	Up
MSTRG_6702	734322	23491.1	351936	4.96623	1.62818	3.05018	0.00228705	0.0261301	Up
MSTRG_6750	252.501	53.5502	217.505	2.23929	0.537313	4.16757	3.07868e-05	0.000797468	Up
MSTRG_7607	279.292	42.5261	219.686	2.71654	0.714125	3.80401	0.000142371	0.00283941	Up
MSTRG_7743	210.239	10.3535	411.659	4.35705	1.07952	4.03611	5.43453e-05	0.0012919	Up
MSTRG_7875	4080.98	0.619523	12649.9	12.7477	1.19186	10.6956	1.06681e-26	1.49059e-23	Up
MSTRG_793	6.57527	0	51.6423	5.36253	1.42752	3.75654	0.000172279	0.00332155	Up
MSTRG_8877	160.55	35.8825	122.022	2.15767	0.585072	3.68788	0.000226133	0.00414136	Up
MSTRG_9659	19.0778	4.03834	17.993	2.19635	0.769395	2.85465	0.00430847	0.0418052	Up
MSTRG_10023	36.0347	836.262	238.936	-4.53869	1.10206	-4.11837	3.8157e-05	0.000951544	Down
MSTRG_10027	140.623	594.92	243.746	-2.08114	0.648601	-3.20866	0.00133357	0.0170512	Down
MSTRG_10515	3.36718	238.493	60.7053	-6.14969	0.972368	-6.32444	2.5415e-10	2.39557e-08	Down
MSTRG_10536	9.14457	292.838	75.4955	-5.00509	1.41841	-3.52865	0.000417679	0.00679424	Down
MSTRG_10662	84.3083	495.524	151.745	-2.55771	0.713749	-3.58349	0.000339031	0.00575215	Down
MSTRG_1223	0.375445	18.6783	4.76344	-5.81365	2.06453	-2.81597	0.00486295	0.0458735	Down
MSTRG_1227	0.532972	60.9158	16.126	-6.69665	1.44453	-4.63586	3.55456e-06	0.00012754	Down
MSTRG_1228	4.24821	446.502	112.688	-6.67869	0.924331	-7.22544	4.995e-13	8.12645e-11	Down
MSTRG_1397	1.33243	70.6975	18.0075	-5.67852	1.84182	-3.0831	0.00204856	0.0238644	Down
MSTRG_1424	193.351	1446.56	432.092	-2.90345	0.710334	-4.08745	4.36144e-05	0.00107022	Down
MSTRG_1853	3.52008	45.1887	15.0089	-3.6064	0.824511	-4.37399	1.21996e-05	0.000368351	Down
MSTRG_2454	24.4147	113.033	405.447	-2.20174	0.702134	-3.13578	0.00171399	0.0208781	Down
MSTRG_2538	2.83677	274.417	70.5082	-6.61177	1.00219	-6.5973	4.18726e-11	4.71374e-09	Down
MSTRG_2607	0	43.0976	10.7744	-7.98229	1.90066	-4.19974	2.67222e-05	0.000712382	Down
MSTRG_2999	1.04526	18.5544	5.54794	-4.24695	1.36846	-3.10346	0.00191273	0.0226929	Down
MSTRG_3227	0.266486	31.9325	8.42369	-6.5857	1.79908	-3.6606	0.000251627	0.00450833	Down
MSTRG_3327	17.535	84.4484	43.4296	-2.28071	0.758616	-3.0064	0.00264357	0.0292331	Down
MSTRG_4372	26.6646	325.958	90.8921	-3.61026	1.24712	-2.89487	0.00379311	0.0379839	Down
MSTRG_4445	0.669812	15.9767	4.16164	-4.64652	1.6532	-2.81062	0.00494464	0.0464229	Down
MSTRG_455	99.64	679.877	287.337	-2.76824	0.669475	-4.13494	3.55054e-05	0.000896238	Down
MSTRG_4599	37.2363	333.476	100.069	-3.16141	1.03518	-3.05398	0.00225825	0.0258507	Down
MSTRG_4672	29.798	802.473	232.264	-4.75034	1.01466	-4.68171	2.84489e-06	0.000104282	Down
MSTRG_4841	280.905	1143.52	439.853	-2.02719	0.272155	-7.44868	9.42816e-14	1.72267e-11	Down
MSTRG_4852	0.669812	32.656	9.95345	-5.69477	1.38033	-4.12565	3.69685e-05	0.000928238	Down
MSTRG_4889	286.609	1489.82	617.062	-2.37899	0.522034	-4.55715	5.18519e-06	0.000176452	Down
MSTRG_5267	11.4159	262.017	68.7298	-4.52453	0.730558	-6.19326	5.89339e-10	5.24291e-08	Down
MSTRG_5293	1734.51	11131.6	8831.52	-2.68208	0.800355	-3.35112	0.000804864	0.0115586	Down
MSTRG_5483	26.5923	842.277	234.725	-4.98601	0.825335	-6.0412	1.52972e-09	1.26164e-07	Down
MSTRG_5599	0.799458	93.926	24.6319	-6.78626	1.64795	-4.118	3.82172e-05	0.000951544	Down
MSTRG_5957	23.9246	702.725	183.554	-4.87417	1.21081	-4.02555	5.68416e-05	0.00134478	Down
MSTRG_5977	76.0013	610.826	375.811	-3.00952	0.542714	-5.5453	2.93443e-08	1.86867e-06	Down
MSTRG_62	2.29917	103.379	28.1299	-5.4421	0.924498	-5.88655	3.94348e-09	3.0216e-07	Down
MSTRG_6515	156.47	1386.9	468.331	-3.14657	0.423903	-7.42286	1.14617e-13	2.07825e-11	Down
MSTRG_6529	4.2756	52.3863	14.2563	-3.61665	1.22862	-2.94366	0.00324354	0.0340449	Down
MSTRG_6930	0.560853	22.9901	6.61024	-5.29361	1.8395	-2.87775	0.00400527	0.0395133	Down
MSTRG_6952	293.24	1980.76	1100.13	-2.75512	0.466611	-5.90454	3.53631e-09	2.73609e-07	Down
MSTRG_7069	6.49162	101.869	33.1495	-3.9444	0.909688	-4.33599	1.45103e-05	0.000424986	Down
MSTRG_7179	72.459	778.345	245.096	-3.42492	1.05663	-3.24138	0.00118952	0.0155759	Down
MSTRG_7249	47.6093	376.778	131.644	-2.98236	0.603681	-4.9403	7.80038e-07	3.44391e-05	Down
MSTRG_7454	3.0475	15.3815	7.32102	-2.32914	0.828442	-2.81147	0.00493151	0.0463546	Down
MSTRG_7463	1.28386	27.2603	8.01554	-4.43941	1.42616	-3.11283	0.00185302	0.0221625	Down
MSTRG_7758	204.489	879.972	334.965	-2.10584	0.662018	-3.18094	0.00146796	0.0184489	Down
MSTRG_7941	0	190.34	48.2218	-10.1253	1.38318	-7.32029	2.47438e-13	4.19814e-11	Down
MSTRG_8128	41.5324	201.349	64.167	-2.27911	0.769668	-2.96116	0.00306486	0.0325122	Down
MSTRG_820	114.513	465.938	155.761	-2.02484	0.695365	-2.91191	0.00359223	0.0365736	Down
MSTRG_8232	0.532972	54.4737	15.0876	-6.54905	1.567	-4.17935	2.92342e-05	0.000765601	Down
MSTRG_8265	16.9825	162.39	59.6651	-3.26505	0.68733	-4.75034	2.03078e-06	7.84345e-05	Down
MSTRG_8370	81.5777	332.092	187.883	-2.02509	0.413413	-4.89847	9.65872e-07	4.11539e-05	Down
MSTRG_8386	49.732	987.159	262.565	-4.31353	1.51685	-2.84374	0.00445878	0.0429828	Down
MSTRG_8426	61.4792	266.17	153.623	-2.11415	0.720118	-2.93584	0.00332644	0.0347157	Down
MSTRG_8548	44.7749	179.376	84.9203	-2.00966	0.61403	-3.2729	0.0010645	0.0142934	Down
MSTRG_8738	27.6408	238.61	70.5147	-3.10913	0.721003	-4.31223	1.61618e-05	0.000464758	Down
MSTRG_8914	10.9501	92.2307	142.877	-3.06353	0.973661	-3.1464	0.00165292	0.0202903	Down
MSTRG_8927	142.351	989.25	851.84	-2.79779	0.700504	-3.99396	6.4978e-05	0.00149906	Down
MSTRG_953	24.3856	125.109	40.5183	-2.35369	0.506006	-4.65151	3.29514e-06	0.000119861	Down
MSTRG_9548	25.7062	173.78	77.2993	-2.75201	0.937946	-2.93408	0.00334534	0.0348059	Down
MSTRG_9598	216.671	1295.93	592.743	-2.5803	0.708677	-3.64101	0.000271568	0.00482105	Down
MSTRG_9781	0	9.19096	4.39868	-5.75186	1.594	-3.60845	0.000308029	0.0053445	Down

## Sheet: Table S7 SEP vs JUL
Name	SEP	JUL	BaseMean	log2FC	lfcSE	Stat	Pvalue	FDR	Threshold
MSTRG_10179	404.581	99.8631	245.51	2.01437	0.397878	5.06279	4.13157e-07	1.08999e-05	Up
MSTRG_10242	54.983	2.61967	38.4366	4.38362	0.904995	4.84381	1.27374e-06	2.87942e-05	Up
MSTRG_10273	354.547	65.1859	263.124	2.44227	0.82346	2.96586	0.0030184	0.0178951	Up
MSTRG_10342	1032.02	127.639	687.201	3.01371	0.750504	4.01558	5.93002e-05	0.000760628	Up
MSTRG_10426	405.707	59.5965	242.004	2.76824	0.490333	5.64563	1.64578e-08	6.38137e-07	Up
MSTRG_10450	32.5391	3.54895	26.8623	3.1974	1.26467	2.52824	0.0114635	0.0499416	Up
MSTRG_10603	374.143	78.1714	387.699	2.25932	0.62224	3.63094	0.000282386	0.00274405	Up
MSTRG_10643	6.62725	0	3.73888	5.34117	1.93764	2.75654	0.00584172	0.0297946	Up
MSTRG_10737	454.487	53.469	197.863	3.09062	0.695848	4.44151	8.93314e-06	0.000156651	Up
MSTRG_1117	23724.6	455.415	17751.9	5.70308	1.05448	5.40843	6.35799e-08	2.09787e-06	Up
MSTRG_1136	29.4244	1.27241	15.408	4.41625	1.10928	3.98119	6.8571e-05	0.000853661	Up
MSTRG_124	277.182	11.0362	173.194	4.655	1.10497	4.21279	2.52236e-05	0.000376069	Up
MSTRG_1271	25658.6	61.5136	10996.3	8.70474	1.57041	5.54297	2.97385e-08	1.0691e-06	Up
MSTRG_1404	2936.49	526.339	1942.93	2.47984	0.819208	3.02712	0.00246899	0.0152308	Up
MSTRG_1464	45.2903	3.47368	19.1305	3.69842	0.961081	3.84819	0.000118994	0.00135663	Up
MSTRG_1552	70.7247	11.7934	58.506	2.58168	0.996552	2.59062	0.00958044	0.0435727	Up
MSTRG_162	424.293	39.0409	300.506	3.44499	0.94947	3.62833	0.000285257	0.00275903	Up
MSTRG_1919	26.3848	5.49532	16.3722	2.30839	0.784225	2.94353	0.0032449	0.0189439	Up
MSTRG_1929	1631.84	8.16008	732.044	7.64975	0.861009	8.88464	6.4128e-19	2.1398e-16	Up
MSTRG_1981	69.4741	8.36989	45.1381	3.05616	0.997958	3.06241	0.00219562	0.0139604	Up
MSTRG_2088	2498.08	488.808	1423.71	2.35368	0.746384	3.15344	0.00161356	0.0110509	Up
MSTRG_2106	51.6066	12.5039	34.3779	2.03595	0.766877	2.65485	0.00793429	0.0377756	Up
MSTRG_2113	638.424	154.224	386.059	2.049	0.364775	5.61714	1.9414e-08	7.33553e-07	Up
MSTRG_2250	430.214	95.5869	264.508	2.17066	0.751272	2.88931	0.00386091	0.021637	Up
MSTRG_2262	4695.25	986.373	3482.58	2.251	0.685931	3.28168	0.00103192	0.00770627	Up
MSTRG_2302	76.1911	3.16626	34.7533	4.57798	0.974385	4.69833	2.62297e-06	5.40824e-05	Up
MSTRG_2367	63.6965	15.229	46.3238	2.06297	0.578105	3.5685	0.000359029	0.00332646	Up
MSTRG_2389	436.412	10.6645	250.002	5.35563	1.08815	4.92176	8.57674e-07	2.04213e-05	Up
MSTRG_2490	1190.04	280.601	784.288	2.08436	0.526137	3.96162	7.44421e-05	0.00091426	Up
MSTRG_2795	928.37	186.471	611.622	2.31508	0.491491	4.71033	2.47321e-06	5.12174e-05	Up
MSTRG_2921	524.769	27.2036	263.053	4.26915	0.736985	5.79272	6.92573e-09	2.98866e-07	Up
MSTRG_3006	1326.7	28.7033	710.626	5.53131	1.06641	5.18684	2.13892e-07	6.14965e-06	Up
MSTRG_3121	1012.55	160.013	446.821	2.66202	0.343801	7.7429	9.71712e-15	1.47569e-12	Up
MSTRG_3254	2876.6	17.4906	1792.03	7.36402	1.197	6.15208	7.64748e-10	4.12044e-08	Up
MSTRG_3273	36.1111	4.67743	21.0511	2.94576	0.880972	3.34376	0.000826524	0.00645605	Up
MSTRG_3315	3519.24	168.579	2092.43	4.38316	0.675417	6.48957	8.60833e-11	5.68078e-09	Up
MSTRG_3406	1836.04	387.608	1097.53	2.24418	0.536098	4.18614	2.83744e-05	0.000416847	Up
MSTRG_3508	60.5449	0	26.9624	8.53645	1.90497	4.48114	7.42447e-06	0.000133252	Up
MSTRG_3552	1020.57	234.833	666.665	2.11967	0.627983	3.37536	0.000737194	0.00589034	Up
MSTRG_3614	936.196	222.525	644.715	2.07241	0.503588	4.11528	3.86709e-05	0.000533888	Up
MSTRG_3715	123.741	1.27433	103.009	6.65622	1.23045	5.40957	6.31763e-08	2.08746e-06	Up
MSTRG_3721	4227.44	23.3881	3476.01	7.49648	1.87244	4.00359	6.23894e-05	0.000791257	Up
MSTRG_3797	45.61	1.78137	38.6437	4.58409	1.06615	4.29967	1.71054e-05	0.000270343	Up
MSTRG_4040	884.234	169.945	629.766	2.37893	0.767952	3.09776	0.00194992	0.0127471	Up
MSTRG_4158	79.3348	16.7496	37.3158	2.24231	0.843004	2.65991	0.00781626	0.0373765	Up
MSTRG_4205	1982.71	112.431	1244.17	4.14072	1.02184	4.05222	5.07346e-05	0.000671433	Up
MSTRG_4306	318.861	66.4612	206.028	2.26339	0.589798	3.83757	0.000124256	0.00140446	Up
MSTRG_4371	1179.12	249.523	736.14	2.23979	0.437016	5.12518	2.9725e-07	8.16008e-06	Up
MSTRG_4377	35.471	2.03778	22.7442	4.116	1.15327	3.56899	0.000358358	0.00332155	Up
MSTRG_4426	37.7298	0	14.411	7.85165	1.43698	5.46401	4.65493e-08	1.59608e-06	Up
MSTRG_4476	22.4283	2.34754	15.617	3.25717	0.846352	3.84848	0.000118852	0.00135567	Up
MSTRG_4490	1262.7	234.777	682.702	2.42654	0.755444	3.21207	0.0013178	0.00938102	Up
MSTRG_4539	792.648	7.42958	497.461	6.74823	0.962839	7.00868	2.40574e-12	2.26168e-10	Up
MSTRG_468	439.222	74.1756	239.889	2.56477	0.585775	4.37842	1.19542e-05	0.00020021	Up
MSTRG_4721	173.317	21.024	96.9258	3.03925	0.795508	3.82052	0.000133173	0.00149117	Up
MSTRG_4787	832.087	6.46735	524.434	7.01532	1.12571	6.23189	4.60835e-10	2.62443e-08	Up
MSTRG_4811	18.0106	3.36739	14.5524	2.43546	0.959162	2.53915	0.0111121	0.0489145	Up
MSTRG_4892	31.0971	5.27697	24.5758	2.55726	0.852823	2.99858	0.0027124	0.0164557	Up
MSTRG_4894	367.862	86.7341	245.09	2.08281	0.498084	4.18164	2.89417e-05	0.000421649	Up
MSTRG_4961	433.074	82.472	283.283	2.39369	0.441204	5.42536	5.78384e-08	1.9343e-06	Up
MSTRG_5126	2030.95	135.128	2484.94	3.91044	0.911339	4.29087	1.77976e-05	0.00027979	Up
MSTRG_5143	4054.21	941.2	2792.64	2.10681	0.430951	4.88874	1.01482e-06	2.36401e-05	Up
MSTRG_5283	6306.42	1533.22	2685.33	2.04027	0.623528	3.27214	0.00106736	0.00791202	Up
MSTRG_5296	98.0176	13.268	101.086	2.89188	0.978918	2.95416	0.00313517	0.0184398	Up
MSTRG_5377	229.062	6.77284	180.181	5.0795	1.17691	4.31596	1.58907e-05	0.000254027	Up
MSTRG_5414	52.4913	12.9062	34.6009	2.02288	0.555399	3.64222	0.0002703	0.00264834	Up
MSTRG_5479	1576.14	207.592	824.934	2.9248	0.743644	3.93307	8.38683e-05	0.00100808	Up
MSTRG_5604	10.5877	2.03778	13.5884	2.36777	0.923782	2.56313	0.0103735	0.0463869	Up
MSTRG_564	212.443	28.1308	244.314	2.91726	1.12089	2.60263	0.00925118	0.042483	Up
MSTRG_5651	963.403	70.138	477.674	3.77955	0.939485	4.02301	5.746e-05	0.000739829	Up
MSTRG_5686	30627.5	236.711	13142.4	7.01579	0.924234	7.59092	3.17645e-14	4.40077e-12	Up
MSTRG_5757	833.217	34.0054	821.591	4.61506	1.38917	3.32217	0.000893198	0.00688602	Up
MSTRG_580	562.064	85.5864	377.873	2.71697	0.789894	3.43966	0.000582447	0.00491059	Up
MSTRG_5824	70.6379	12.3991	46.849	2.5147	0.877759	2.86491	0.00417131	0.0229927	Up
MSTRG_5864	1225.19	15.4042	585.507	6.31388	1.0958	5.76191	8.31695e-09	3.51851e-07	Up
MSTRG_5996	1183.09	276.494	855.958	2.09716	0.396955	5.28311	1.27011e-07	3.83313e-06	Up
MSTRG_6052	585.786	143.557	339.877	2.02805	0.503661	4.02661	5.65857e-05	0.000730955	Up
MSTRG_6076	1501.1	78.5114	995.192	4.25836	0.724392	5.87852	4.13939e-09	1.87149e-07	Up
MSTRG_6139	20.5829	4.58452	11.7047	2.14591	0.662857	3.23737	0.00120638	0.00873484	Up
MSTRG_6167	32.1334	0.508962	17.1398	5.86608	1.74013	3.37105	0.000748828	0.0059652	Up
MSTRG_6224	59.933	1.25669	46.444	5.6111	1.41532	3.96455	7.35342e-05	0.000904987	Up
MSTRG_6333	565.812	91.4986	415.184	2.62973	0.840193	3.12992	0.00174857	0.0117286	Up
MSTRG_6654	269.974	9.14863	118.402	4.88401	1.06307	4.59425	4.34303e-06	8.39925e-05	Up
MSTRG_6702	641531	23491.1	351936	4.77133	1.66815	2.86026	0.00423297	0.0232622	Up
MSTRG_6749	1438.33	294.356	953.48	2.2895	0.59261	3.86342	0.000111812	0.00129084	Up
MSTRG_6750	252.603	53.5502	217.505	2.2394	0.546238	4.09968	4.13713e-05	0.000567204	Up
MSTRG_6786	719.883	124.178	524.577	2.53491	0.794555	3.19035	0.001421	0.0099985	Up
MSTRG_6906	101.014	13.0301	82.79	2.95335	1.10512	2.67243	0.00753041	0.036305	Up
MSTRG_6967	224.04	17.9977	102.268	3.63389	0.832155	4.36684	1.26058e-05	0.000209281	Up
MSTRG_7366	693.387	169.573	460.931	2.03113	0.594718	3.41529	0.00063715	0.00525217	Up
MSTRG_7417	165.372	17.4131	135.111	3.24602	1.0909	2.97554	0.00292472	0.0174577	Up
MSTRG_7607	282.575	42.5261	219.686	2.73348	0.726602	3.762	0.000168559	0.00180448	Up
MSTRG_7672	49.2275	0	1851.67	20.8081	3.49863	5.94749	2.7229e-09	1.29017e-07	Up
MSTRG_7697	565.778	60.1536	211.456	3.23646	0.628966	5.14568	2.66553e-07	7.42931e-06	Up
MSTRG_7743	415.053	10.3535	411.659	5.33514	1.21334	4.39708	1.09715e-05	0.000186193	Up
MSTRG_7744	3277.89	550.545	1324.1	2.5738	0.796921	3.22968	0.00123927	0.00892387	Up
MSTRG_7794	938.173	229.34	575.911	2.0324	0.343051	5.92448	3.13281e-09	1.4496e-07	Up
MSTRG_7875	15752	0.619523	12649.9	14.6808	1.44389	10.1675	2.76879e-24	2.62382e-21	Up
MSTRG_793	89.6192	0	51.6423	9.10186	1.90855	4.76899	1.85154e-06	4.00227e-05	Up
MSTRG_7979	531.826	130.187	367.846	2.03207	0.430835	4.71659	2.39828e-06	4.98838e-05	Up
MSTRG_8007	378.649	69.9575	203.612	2.43493	0.905915	2.68781	0.00719222	0.0351176	Up
MSTRG_8097	458.679	114.304	307.185	2.00448	0.518867	3.86318	0.000111919	0.00129088	Up
MSTRG_8255	54.9189	2.84079	78.9099	4.29378	1.33271	3.22185	0.00127365	0.00912152	Up
MSTRG_8373	80854.7	830.711	21525.4	6.60498	0.664625	9.9379	2.84779e-23	1.87408e-20	Up
MSTRG_8572	6.21457	0	6.18723	5.2493	1.86696	2.81169	0.00492826	0.0261313	Up
MSTRG_8670	98.8618	8.01863	52.4724	3.61466	1.14907	3.14572	0.00165679	0.0112823	Up
MSTRG_8741	16.0386	1.63703	7.30531	3.36894	1.09378	3.08009	0.00206935	0.0133184	Up
MSTRG_8877	184.543	35.8825	122.022	2.35766	0.570288	4.13416	3.56249e-05	0.000499107	Up
MSTRG_8892	75.7722	13.6358	50.644	2.47888	0.794736	3.11913	0.00181389	0.0120639	Up
MSTRG_9050	122.158	13.592	62.4716	3.16638	1.11482	2.84026	0.00450773	0.0244881	Up
MSTRG_9218	414.726	55.0807	219.013	2.91303	0.748376	3.89246	9.92315e-05	0.00116611	Up
MSTRG_9283	242.048	53.3534	164.418	2.18283	0.571758	3.81775	0.000134677	0.00150643	Up
MSTRG_9536	247.536	33.3212	158.691	2.89302	0.849093	3.40719	0.000656362	0.005375	Up
MSTRG_9659	19.015	4.03834	17.993	2.18633	0.773202	2.82763	0.00468941	0.0252492	Up
MSTRG_967	726.775	100.63	456.362	2.8526	0.905796	3.14927	0.00163677	0.0111686	Up
MSTRG_9677	103.169	13.5629	81.0338	2.93084	0.830911	3.52726	0.000419889	0.00378236	Up
MSTRG_9798	30.067	1.58217	17.6951	4.20203	1.47659	2.84576	0.0044305	0.0241516	Up
MSTRG_9906	2266.26	398.263	1288.61	2.50837	0.707756	3.54411	0.000393936	0.00359366	Up
MSTRG_9924	3744.35	581.882	2448.57	2.68599	0.826711	3.24901	0.00115808	0.00845261	Up
MSTRG_9997	41.7356	1.0732	30.6649	5.23575	1.62039	3.23117	0.00123285	0.00889116	Up
MSTRG_10023	6.21457	836.262	238.936	-7.08	0.820787	-8.62587	6.36089e-18	1.75228e-15	Down
MSTRG_10027	111.043	594.92	243.746	-2.42092	0.658424	-3.67684	0.000236137	0.00237047	Down
MSTRG_10045	178.083	964.265	472.709	-2.43639	0.719813	-3.38476	0.000712416	0.00573102	Down
MSTRG_1020	159.959	641.396	297.322	-2.0033	0.60785	-3.29571	0.00098173	0.00739366	Down
MSTRG_10201	118.627	708.656	430.88	-2.57811	0.771979	-3.33961	0.000838951	0.00653803	Down
MSTRG_10257	25.124	128.474	61.9075	-2.35656	0.494779	-4.76286	1.90872e-06	4.10341e-05	Down
MSTRG_1029	91.8507	404.602	159.901	-2.13959	0.644864	-3.3179	0.00090697	0.00696952	Down
MSTRG_10515	0.620597	238.493	60.7053	-8.50661	1.53715	-5.53401	3.12996e-08	1.11507e-06	Down
MSTRG_10530	0.726893	22.1356	7.00561	-4.97229	1.87734	-2.64859	0.00808294	0.0382374	Down
MSTRG_10536	0	292.838	75.4955	-10.6101	2.39873	-4.42322	9.72416e-06	0.000168157	Down
MSTRG_1059	8.31319	88.6245	39.3685	-3.40695	0.767401	-4.4396	9.01263e-06	0.000157578	Down
MSTRG_10630	4.94055	23.0198	12.1441	-2.20298	0.691253	-3.18693	0.00143791	0.0100905	Down
MSTRG_10662	9.30974	495.524	151.745	-5.73786	0.961564	-5.96721	2.4134e-09	1.16211e-07	Down
MSTRG_10760	11.6897	63.8118	32.8696	-2.44503	0.75975	-3.2182	0.00128996	0.0092105	Down
MSTRG_10774	7.37839	70.1019	27.0708	-3.25787	1.03127	-3.1591	0.00158256	0.0109053	Down
MSTRG_10823	365.771	2070.97	834.962	-2.50126	0.602978	-4.14817	3.35144e-05	0.000474024	Down
MSTRG_1107	97.7613	1194.39	374.762	-3.61062	1.15258	-3.13265	0.00173236	0.0116529	Down
MSTRG_1109	10.2367	216.147	77.6589	-4.40233	0.839984	-5.24097	1.59734e-07	4.71265e-06	Down
MSTRG_1150	32.5181	568.107	192.1	-4.12819	0.92796	-4.44867	8.64031e-06	0.000152078	Down
MSTRG_1223	0	18.6783	4.76344	-6.63871	2.06587	-3.21352	0.0013112	0.00934434	Down
MSTRG_1227	0.726893	60.9158	16.126	-6.45478	1.43732	-4.49084	7.09428e-06	0.0001282	Down
MSTRG_1228	0	446.502	112.688	-11.2186	1.92424	-5.83015	5.53777e-09	2.46145e-07	Down
MSTRG_1311	15.3516	136.431	50.7701	-3.15235	0.954213	-3.30361	0.000954474	0.00723328	Down
MSTRG_1337	47.5484	589.467	234.877	-3.63177	0.828711	-4.38243	1.17363e-05	0.000197196	Down
MSTRG_1395	189.328	2268.42	888.229	-3.5826	1.04381	-3.43224	0.000598615	0.00501123	Down
MSTRG_1397	0	70.6975	18.0075	-8.55935	2.21762	-3.8597	0.000113527	0.00130719	Down
MSTRG_1424	35.0004	1446.56	432.092	-5.36853	0.873811	-6.14381	8.05631e-10	4.31814e-08	Down
MSTRG_1536	4.2629	122.536	41.5653	-4.86422	0.970832	-5.01036	5.4328e-07	1.38396e-05	Down
MSTRG_1716	115.42	573.039	356.606	-2.31114	0.81822	-2.82459	0.00473404	0.0254145	Down
MSTRG_175	141.443	1810.8	693.972	-3.67831	1.01452	-3.62567	0.000288215	0.00278244	Down
MSTRG_1822	0.673745	19.388	12.7152	-4.83708	1.37234	-3.52469	0.000423981	0.00381342	Down
MSTRG_1853	4.63416	45.1887	15.0089	-3.27351	0.836625	-3.91275	9.12502e-05	0.00107929	Down
MSTRG_2181	28.1403	177.375	77.6907	-2.65508	0.954324	-2.78216	0.00539981	0.0280788	Down
MSTRG_2246	9802.4	46742.4	24293	-2.25351	0.748306	-3.01149	0.00259972	0.0158614	Down
MSTRG_2345	24.9122	114.481	61.5643	-2.20501	0.586404	-3.76023	0.00016976	0.0018108	Down
MSTRG_2481	10.8073	3183.19	835.699	-8.19975	2.18443	-3.75372	0.000174232	0.00184686	Down
MSTRG_2538	1.04111	274.417	70.5082	-8.06454	1.13922	-7.079	1.45203e-12	1.43933e-10	Down
MSTRG_2607	0	43.0976	10.7744	-7.84555	1.93491	-4.05474	5.01907e-05	0.000665026	Down
MSTRG_2678	0	10.443	2.85691	-5.7996	2.01193	-2.88261	0.003944	0.0220163	Down
MSTRG_2999	1.00437	18.5544	5.54794	-4.1953	1.38423	-3.03079	0.00243915	0.0150956	Down
MSTRG_3002	34.7519	244.003	94.8596	-2.81236	0.834069	-3.37185	0.000746643	0.005951	Down
MSTRG_3009	161.738	686.151	286.328	-2.08383	0.579286	-3.59725	0.000321601	0.00304186	Down
MSTRG_3178	125.247	655.156	285.175	-2.3865	0.484469	-4.92601	8.39242e-07	2.00025e-05	Down
MSTRG_3227	0.363447	31.9325	8.42369	-6.44895	1.7974	-3.58793	0.000333314	0.00312858	Down
MSTRG_3496	232.886	1016.15	511.153	-2.12469	0.436406	-4.86862	1.12382e-06	2.5749e-05	Down
MSTRG_3880	78.3249	3687.61	1023.89	-5.55701	1.63386	-3.40115	0.000671037	0.00546775	Down
MSTRG_3928	0.363447	43.9175	15.1584	-6.91176	1.50864	-4.58144	4.61788e-06	8.90896e-05	Down
MSTRG_3950	569.368	15856.3	5282.98	-4.79944	1.77134	-2.70949	0.00673868	0.0333778	Down
MSTRG_4111	9.35897	37.796	18.9131	-2.02363	0.748502	-2.70358	0.00685973	0.0338429	Down
MSTRG_4117	2.02124	45.9742	14.3315	-4.50518	1.61961	-2.78165	0.00540838	0.0280925	Down
MSTRG_4119	31.6028	266.161	109.868	-3.07361	0.753368	-4.07983	4.50688e-05	0.000607352	Down
MSTRG_4340	0.694072	13.8531	7.29679	-4.33572	1.70994	-2.53559	0.0112257	0.0492313	Down
MSTRG_4372	0.694072	325.958	90.8921	-8.897	1.4325	-6.21083	5.27047e-10	2.94487e-08	Down
MSTRG_4441	2.79269	6936.69	2169.1	-11.271	2.92059	-3.85914	0.000113786	0.0013086	Down
MSTRG_4445	0	15.9767	4.16164	-6.41358	1.72031	-3.72815	0.00019289	0.00200629	Down
MSTRG_455	155.57	679.877	287.337	-2.12813	0.736353	-2.89009	0.00385131	0.0215919	Down
MSTRG_4574	67.5404	288.046	162.473	-2.08907	0.586998	-3.55891	0.000372395	0.00343034	Down
MSTRG_4599	25.1999	333.476	100.069	-3.72482	1.15305	-3.23041	0.00123614	0.00890946	Down
MSTRG_46	19.5903	82.574	43.607	-2.07013	0.575806	-3.59518	0.000324166	0.00305846	Down
MSTRG_4672	23.1027	802.473	232.264	-5.11612	0.991457	-5.1602	2.46684e-07	6.91036e-06	Down
MSTRG_4828	1.24119	109.061	29.0351	-6.42892	2.11809	-3.03525	0.00240336	0.0149404	Down
MSTRG_4841	169.296	1143.52	439.853	-2.75509	0.38123	-7.22684	4.94365e-13	5.22858e-11	Down
MSTRG_4852	3.02561	32.656	9.95345	-3.42553	1.16773	-2.93349	0.00335173	0.019391	Down
MSTRG_4889	233.472	1489.82	617.062	-2.67333	0.488044	-5.47764	4.31041e-08	1.49077e-06	Down
MSTRG_4928	10.4493	64.4519	26.1849	-2.63581	0.595294	-4.42775	9.52215e-06	0.000165146	Down
MSTRG_5267	0.694072	262.017	68.7298	-8.57835	1.62946	-5.26455	1.40534e-07	4.20377e-06	Down
MSTRG_5355	200.455	963.763	435.627	-2.26573	0.44567	-5.08387	3.69817e-07	9.87748e-06	Down
MSTRG_5483	28.8929	842.277	234.725	-4.86679	0.84318	-5.77194	7.83637e-09	3.35111e-07	Down
MSTRG_5599	0.620597	93.926	24.6319	-7.17333	1.72485	-4.15882	3.19899e-05	0.000456275	Down
MSTRG_5957	2.73955	702.725	183.554	-8.00552	1.45525	-5.50112	3.77395e-08	1.3219e-06	Down
MSTRG_601	0.310298	42.1312	12.5869	-6.84982	1.71264	-3.99956	6.34604e-05	0.000802263	Down
MSTRG_6106	47.0372	266.66	104.428	-2.50287	0.667611	-3.74899	0.000177547	0.00187445	Down
MSTRG_62	1.96809	103.379	28.1299	-5.68969	0.955084	-5.95727	2.56485e-09	1.22662e-07	Down
MSTRG_6200	21.2723	131.273	61.6867	-2.62369	0.864845	-3.03372	0.00241562	0.0150049	Down
MSTRG_6352	3.49535	30.0588	12.4429	-3.12509	0.760126	-4.11128	3.93468e-05	0.000541326	Down
MSTRG_6459	55.13	360.453	186.983	-2.7091	0.60729	-4.46096	8.1593e-06	0.000144579	Down
MSTRG_648	0.657335	37.3412	15.042	-5.81099	2.08218	-2.79082	0.00525755	0.0275141	Down
MSTRG_6515	132.773	1386.9	468.331	-3.38488	0.40779	-8.30056	1.03619e-16	2.29424e-14	Down
MSTRG_6529	0.363447	52.3863	14.2563	-7.16553	2.04638	-3.50156	0.000462538	0.00408271	Down
MSTRG_6778	0.967633	33.3096	10.5895	-5.08084	1.82087	-2.79033	0.0052654	0.0275431	Down
MSTRG_6900	3.71968	22.3803	9.83178	-2.58944	0.784975	-3.29875	0.000971149	0.00734126	Down
MSTRG_6930	0	22.9901	6.61024	-6.94191	1.8014	-3.85362	0.000116384	0.00133329	Down
MSTRG_7065	214.162	953.233	421.316	-2.15374	0.352013	-6.11835	9.45477e-10	4.98871e-08	Down
MSTRG_7069	7.39872	101.869	33.1495	-3.79411	0.939177	-4.03983	5.34899e-05	0.000697814	Down
MSTRG_7147	323.521	2456.65	969.179	-2.92452	0.998151	-2.92994	0.00339025	0.0195612	Down
MSTRG_7179	23.3217	778.345	245.096	-5.06051	0.935046	-5.41204	6.23106e-08	2.06751e-06	Down
MSTRG_7249	66.2233	376.778	131.644	-2.51079	0.564635	-4.44676	8.71747e-06	0.000153095	Down
MSTRG_7454	2.97246	15.3815	7.32102	-2.34748	0.843914	-2.78166	0.00540821	0.0280925	Down
MSTRG_7463	0	27.2603	8.01554	-7.1835	1.49454	-4.80651	1.53589e-06	3.3754e-05	Down
MSTRG_7741	9.18311	49.7137	19.5609	-2.43791	0.961273	-2.53613	0.0112085	0.0491923	Down
MSTRG_7758	98.5991	879.972	334.965	-3.15693	0.656417	-4.80933	1.51435e-06	3.34129e-05	Down
MSTRG_7941	1.75159	190.34	48.2218	-6.79171	0.976015	-6.95861	3.4365e-12	3.1074e-10	Down
MSTRG_8125	10.9996	53.6536	26.8834	-2.28374	0.901544	-2.53314	0.0113046	0.049486	Down
MSTRG_8128	11.3466	201.349	64.167	-4.14781	1.22864	-3.37594	0.000735627	0.00587981	Down
MSTRG_820	31.6466	465.938	155.761	-3.87792	1.05184	-3.68678	0.000227108	0.00229637	Down
MSTRG_8220	7.24317	86.0089	36.2999	-3.55403	0.636597	-5.58287	2.36587e-08	8.81287e-07	Down
MSTRG_8232	0.347036	54.4737	15.0876	-7.22181	1.61299	-4.47729	7.55974e-06	0.000135373	Down
MSTRG_8265	28.9931	162.39	59.6651	-2.48528	0.726728	-3.41982	0.000626627	0.00518527	Down
MSTRG_83	0	26.5454	7.86818	-7.14553	2.0822	-3.43173	0.00059975	0.00501896	Down
MSTRG_8386	12.6324	987.159	262.565	-6.2846	1.79549	-3.50021	0.000464884	0.00409884	Down
MSTRG_845	71.5806	390.667	177.826	-2.45027	0.54237	-4.51772	6.25092e-06	0.000115156	Down
MSTRG_8518	339.137	1403.45	664.516	-2.0491	0.31984	-6.40665	1.48754e-10	9.3727e-09	Down
MSTRG_8548	39.9081	179.376	84.9203	-2.16534	0.606285	-3.57149	0.00035496	0.0032952	Down
MSTRG_855	395.05	2463.11	1119.76	-2.64035	0.665382	-3.96816	7.24289e-05	0.000893705	Down
MSTRG_8738	4.64666	238.61	70.5147	-5.67235	0.84523	-6.71101	1.93283e-11	1.48671e-09	Down
MSTRG_8812	6.97037	31.0678	14.9705	-2.16648	0.81683	-2.6523	0.00799445	0.0379552	Down
MSTRG_8971	39.5072	228.334	109.9	-2.53047	0.719309	-3.51792	0.000434947	0.00387978	Down
MSTRG_9158	36.2823	561.607	200.376	-3.95276	0.892679	-4.42798	9.51203e-06	0.000165091	Down
MSTRG_923	4.90772	293.489	96.3785	-5.89667	1.59142	-3.70528	0.00021116	0.00215536	Down
MSTRG_9272	63.0758	894.483	413.888	-3.82564	0.703265	-5.43983	5.33312e-08	1.79981e-06	Down
MSTRG_9329	171.471	750.943	383.357	-2.13112	0.528829	-4.02989	5.58028e-05	0.000723208	Down
MSTRG_9351	28.5655	174.537	76.3315	-2.6111	0.609981	-4.28063	1.86367e-05	0.000290475	Down
MSTRG_9405	617.391	4629.26	1943.4	-2.90639	0.562915	-5.1631	2.42895e-07	6.85051e-06	Down
MSTRG_947	0	24.3119	6.07797	-7.02007	2.75503	-2.54809	0.0108315	0.0479822	Down
MSTRG_953	4.12378	125.109	40.5183	-4.93142	0.766537	-6.43338	1.24798e-10	7.96924e-09	Down
MSTRG_9530	46.5136	204.338	111.766	-2.13389	0.669367	-3.18793	0.00143297	0.0100618	Down
MSTRG_9598	234.908	1295.93	592.743	-2.46397	0.73961	-3.33145	0.000863959	0.00669985	Down
MSTRG_9637	107.701	465.863	241.786	-2.11399	0.483003	-4.37676	1.20456e-05	0.000201534	Down

## Sheet: Table S7 NOV vs JUL
Name	NOV	JUL	BaseMean	log2FC	lfcSE	Stat	Pvalue	FDR	Threshold
MSTRG_1003	1573.66	302.276	658.306	2.38045	0.682428	3.4882	0.000486279	0.00305685	Up
MSTRG_10149	1167.04	152.404	559.203	2.93418	0.351635	8.34439	7.1582e-17	1.50404e-14	Up
MSTRG_10168	165.434	21.1032	73.6238	2.97009	0.740884	4.00884	6.10171e-05	0.000546278	Up
MSTRG_10239	1989.09	492.575	1115.62	2.01379	0.642998	3.13188	0.00173691	0.00864921	Up
MSTRG_10242	64.3763	2.61967	38.4366	4.6122	0.880259	5.23959	1.60933e-07	3.40253e-06	Up
MSTRG_10273	540.56	65.1859	263.124	3.05046	0.689568	4.42372	9.7015e-06	0.000116042	Up
MSTRG_10342	1254.45	127.639	687.201	3.29495	0.688876	4.78309	1.72624e-06	2.63406e-05	Up
MSTRG_1035	19.5768	2.07541	9.15099	3.25101	0.910436	3.57083	0.000355854	0.0023463	Up
MSTRG_10426	268.111	59.5965	242.004	2.17047	0.540704	4.01415	5.96595e-05	0.000535335	Up
MSTRG_10450	62.9395	3.54895	26.8623	4.14929	1.13137	3.6675	0.000244934	0.00172719	Up
MSTRG_10469	31.7493	6.48265	16.6576	2.30894	0.864979	2.66936	0.00759965	0.027936	Up
MSTRG_10549	15.9538	1.80329	6.26525	3.15358	1.28342	2.45716	0.0140039	0.045127	Up
MSTRG_10603	845.698	78.1714	387.699	3.43573	0.359214	9.56457	1.12672e-21	7.03992e-19	Up
MSTRG_10643	7.41986	0	3.73888	5.50324	1.91582	2.87252	0.00407212	0.0170339	Up
MSTRG_10736	2358.59	328.238	1063.47	2.84551	0.606082	4.69493	2.66694e-06	3.8029e-05	Up
MSTRG_10765	1454.28	342.192	877.535	2.08729	0.550077	3.79453	0.000147921	0.0011457	Up
MSTRG_1117	40923.7	455.415	17751.9	6.48965	0.933198	6.9542	3.54566e-12	2.78757e-10	Up
MSTRG_1136	19.8717	1.27241	15.408	3.86023	1.18471	3.25838	0.00112049	0.00605184	Up
MSTRG_124	201.294	11.0362	173.194	4.19331	1.10132	3.80753	0.000140359	0.0010966	Up
MSTRG_1271	17896	61.5136	10996.3	8.18491	1.60383	5.10337	3.3366e-07	6.41464e-06	Up
MSTRG_135	153.911	34.2575	77.6581	2.1683	0.65305	3.32027	0.000899316	0.00504548	Up
MSTRG_1404	3652.93	526.339	1942.93	2.79476	0.747911	3.73676	0.000186408	0.00138265	Up
MSTRG_1420	119.971	17.0876	47.798	2.81242	0.45698	6.15437	7.53785e-10	3.19591e-08	Up
MSTRG_1475	48.6522	9.55365	25.6611	2.36153	0.397942	5.93435	2.95019e-09	1.0581e-07	Up
MSTRG_1551	63.8672	15.6889	40.3149	2.03147	0.71205	2.85299	0.00433104	0.0178651	Up
MSTRG_1552	131.049	11.7934	58.506	3.4704	0.84072	4.12789	3.66106e-05	0.000355229	Up
MSTRG_1606	386.486	70.356	228.607	2.45647	0.979843	2.50701	0.0121758	0.0405059	Up
MSTRG_162	341.844	39.0409	300.506	3.13319	0.936859	3.34436	0.000824723	0.00471387	Up
MSTRG_1696	1274.15	260.587	809.592	2.28967	0.502705	4.55471	5.24591e-06	6.82486e-05	Up
MSTRG_187	2811.8	686.905	1627.76	2.03359	0.358556	5.67162	1.41453e-08	4.15146e-07	Up
MSTRG_1929	531.406	8.16008	732.044	6.03052	0.901683	6.68808	2.26123e-11	1.46689e-09	Up
MSTRG_1961	886.56	43.1995	311.258	4.35944	1.23137	3.54033	0.000399631	0.00258964	Up
MSTRG_1981	84.8752	8.36989	45.1381	3.34564	0.942014	3.55158	0.000382931	0.00249504	Up
MSTRG_2002	98.3615	11.5953	48.5992	3.09361	1.0048	3.07883	0.00207813	0.00997395	Up
MSTRG_2088	2182.96	488.808	1423.71	2.15916	0.774262	2.78866	0.00529261	0.0209437	Up
MSTRG_2106	51.9567	12.5039	34.3779	2.0481	0.761589	2.68925	0.00716129	0.0266302	Up
MSTRG_2136	9694.67	1879.39	4117.12	2.36694	0.763015	3.10209	0.00192161	0.00937238	Up
MSTRG_2198	325.775	0	81.8193	10.9641	1.89409	5.78856	7.09934e-09	2.28401e-07	Up
MSTRG_2214	197.668	26.4314	92.8011	2.90317	0.741279	3.91644	8.98678e-05	0.000759876	Up
MSTRG_2250	401.906	95.5869	264.508	2.07259	0.759239	2.72982	0.00633691	0.0241543	Up
MSTRG_2262	6416.83	986.373	3482.58	2.70166	0.588527	4.59056	4.42068e-06	5.91324e-05	Up
MSTRG_2302	22.127	3.16626	34.7533	2.79161	1.00368	2.78137	0.00541305	0.0213279	Up
MSTRG_2357	20.6389	2.07541	7.63012	3.32115	0.863521	3.84605	0.000120036	0.000962194	Up
MSTRG_2367	77.8124	15.229	46.3238	2.35272	0.503465	4.67305	2.96765e-06	4.17176e-05	Up
MSTRG_2389	495.251	10.6645	250.002	5.53819	1.05075	5.27069	1.35914e-07	2.93364e-06	Up
MSTRG_2454	975.041	113.033	405.447	3.10918	1.2009	2.58904	0.00962432	0.0336738	Up
MSTRG_2478	9866.05	1903.08	4308.97	2.37415	0.625064	3.79824	0.000145726	0.00113145	Up
MSTRG_2490	1156.89	280.601	784.288	2.04373	0.527584	3.87376	0.000107168	0.000878316	Up
MSTRG_2569	123.258	20.7103	57.0023	2.56901	0.602198	4.26605	1.98962e-05	0.000214238	Up
MSTRG_2708	35.2097	6.74857	19.6486	2.3733	0.961633	2.46799	0.0135874	0.0440839	Up
MSTRG_2742	282.565	27.5906	121.258	3.35188	0.552818	6.06326	1.33386e-09	5.26076e-08	Up
MSTRG_2754	22.5103	3.67481	9.8793	2.64127	0.738361	3.57721	0.000347287	0.00229555	Up
MSTRG_2795	762.152	186.471	611.622	2.03043	0.515721	3.93706	8.2486e-05	0.000708306	Up
MSTRG_2810	8.55949	0.254481	3.53291	4.75355	1.77957	2.67118	0.00755862	0.0278412	Up
MSTRG_2911	60.6153	13.8707	36.639	2.13101	0.490936	4.34071	1.42026e-05	0.000160572	Up
MSTRG_2921	396.9	27.2036	263.053	3.86635	0.807051	4.79071	1.66194e-06	2.55567e-05	Up
MSTRG_3006	1351.35	28.7033	710.626	5.55787	1.05043	5.29102	1.21633e-07	2.66414e-06	Up
MSTRG_3193	83.2171	14.5746	35.5156	2.50733	0.815156	3.07589	0.00209877	0.0100507	Up
MSTRG_3244	540.455	103.846	238.732	2.37913	0.665169	3.57672	0.000347927	0.00229787	Up
MSTRG_3254	2399.7	17.4906	1792.03	7.10254	1.18849	5.97612	2.28513e-09	8.49073e-08	Up
MSTRG_3273	31.3374	4.67743	21.0511	2.74371	0.911718	3.00939	0.00261777	0.0119803	Up
MSTRG_3315	2471.87	168.579	2092.43	3.87352	0.692445	5.59398	2.21926e-08	6.11391e-07	Up
MSTRG_3393	363.347	71.5473	203.742	2.34358	0.50155	4.67267	2.97305e-06	4.17688e-05	Up
MSTRG_3508	2.72806	0	26.9624	4.03697	1.47226	2.74202	0.00610628	0.0234446	Up
MSTRG_3585	58.3237	7.61155	31.8199	2.93642	0.945738	3.1049	0.00190344	0.0093144	Up
MSTRG_3614	934.257	222.525	644.715	2.06921	0.497723	4.15735	3.21967e-05	0.000319585	Up
MSTRG_3707	13.3763	1.76565	6.2802	2.91783	0.9425	3.09584	0.00196254	0.00953842	Up
MSTRG_3715	217.933	1.27433	103.009	7.47919	1.15014	6.50287	7.87996e-11	4.32087e-09	Up
MSTRG_3721	9646.58	23.3881	3476.01	8.68653	1.75577	4.94742	7.52032e-07	1.29575e-05	Up
MSTRG_3732	142.611	30.3952	70.6223	2.23455	0.727327	3.07228	0.00212432	0.0101444	Up
MSTRG_3775	17.1605	1.12849	6.81806	3.90353	1.48393	2.63053	0.00852526	0.0306226	Up
MSTRG_3797	69.2257	1.78137	38.6437	5.17952	1.01238	5.11617	3.11801e-07	6.05322e-06	Up
MSTRG_3952	8.56548	1.0732	4.0499	2.91317	1.08337	2.68898	0.00716708	0.0266453	Up
MSTRG_4040	1120.47	169.945	629.766	2.72042	0.705163	3.85785	0.000114389	0.000926305	Up
MSTRG_4059	176.375	29.3006	80.3274	2.58708	0.927004	2.7908	0.00525784	0.0208409	Up
MSTRG_4205	2582.43	112.431	1244.17	4.52203	0.94943	4.76289	1.90843e-06	2.86783e-05	Up
MSTRG_4251	5.50565	0	2.83215	5.07087	1.98797	2.55078	0.0107482	0.0367187	Up
MSTRG_4300	2808.07	683.166	1704.98	2.03884	0.476502	4.27878	1.87923e-05	0.000203924	Up
MSTRG_4306	302.334	66.4612	206.028	2.18639	0.597338	3.66022	0.000252002	0.00176863	Up
MSTRG_4377	46.7233	2.03778	22.7442	4.5142	1.08179	4.1729	3.00749e-05	0.000301295	Up
MSTRG_4426	8.17819	0	14.411	5.64023	1.56728	3.59874	0.000319764	0.00215014	Up
MSTRG_4476	27.743	2.34754	15.617	3.55704	0.796996	4.46306	8.07969e-06	9.87319e-05	Up
MSTRG_4490	942.933	234.777	682.702	2.00532	0.817253	2.45373	0.0141384	0.0454553	Up
MSTRG_4539	628.014	7.42958	497.461	6.41234	0.961083	6.67199	2.52358e-11	1.61317e-09	Up
MSTRG_457	146.898	24.245	66.7864	2.60208	0.550009	4.73098	2.23433e-06	3.28482e-05	Up
MSTRG_4658	138.323	28.1953	81.9633	2.28899	0.63729	3.59176	0.000328449	0.00219672	Up
MSTRG_4708	160.672	30.8509	72.6162	2.38189	0.803256	2.96529	0.00302399	0.0134483	Up
MSTRG_4721	143.797	21.024	96.9258	2.76983	0.831943	3.32935	0.000870482	0.0049139	Up
MSTRG_4787	879.603	6.46735	524.434	7.09569	1.10541	6.41909	1.37095e-10	7.0001e-09	Up
MSTRG_4800	96.1368	10.8288	36.5637	3.14339	0.792504	3.9664	7.29665e-05	0.000638336	Up
MSTRG_4811	24.8151	3.36739	14.5524	2.90447	0.914177	3.17714	0.00148737	0.0076121	Up
MSTRG_4892	47.8084	5.27697	24.5758	3.17833	0.74821	4.24791	2.15771e-05	0.000229734	Up
MSTRG_4894	367.89	86.7341	245.09	2.08288	0.492711	4.22739	2.36417e-05	0.000248264	Up
MSTRG_4961	351.391	82.472	283.283	2.09214	0.473431	4.41911	9.91099e-06	0.000118012	Up
MSTRG_5126	4093.38	135.128	2484.94	4.92157	0.928078	5.30296	1.13938e-07	2.52352e-06	Up
MSTRG_5143	4057.28	941.2	2792.64	2.10789	0.424648	4.96387	6.91039e-07	1.20553e-05	Up
MSTRG_5292	172.217	36.6858	103.338	2.2322	0.5929	3.76488	0.000166626	0.00126195	Up
MSTRG_5295	31.6342	6.22624	14.3565	2.34627	0.777953	3.01596	0.00256168	0.0117697	Up
MSTRG_5296	238.25	13.268	101.086	4.17523	0.814651	5.12517	2.97268e-07	5.79477e-06	Up
MSTRG_5297	229.905	55.9704	128.498	2.03321	0.614881	3.30668	0.00094409	0.00524585	Up
MSTRG_5377	411.036	6.77284	180.181	5.92313	1.07091	5.53093	3.18537e-08	8.31103e-07	Up
MSTRG_5479	1029.14	207.592	824.934	2.30977	0.814103	2.8372	0.00455113	0.0185857	Up
MSTRG_5559	44.1063	8.3193	17.6876	2.4116	0.96283	2.5047	0.0122554	0.0407079	Up
MSTRG_5604	26.735	2.03778	13.5884	3.70378	0.874774	4.23398	2.29589e-05	0.000241949	Up
MSTRG_564	636.877	28.1308	244.314	4.50169	0.930051	4.84027	1.29664e-06	2.06758e-05	Up
MSTRG_5651	695.141	70.138	477.674	3.3088	0.993276	3.3312	0.000864736	0.00488844	Up
MSTRG_5686	16069.7	236.711	13142.4	6.08525	1.02739	5.92301	3.16111e-09	1.12357e-07	Up
MSTRG_5757	2220.54	34.0054	821.591	6.02933	1.19688	5.03755	4.71529e-07	8.6294e-06	Up
MSTRG_5805	16.7845	3.36546	8.19041	2.28425	0.710277	3.216	0.00129993	0.00683744	Up
MSTRG_5864	847.09	15.4042	585.507	5.78143	1.14022	5.07044	3.96904e-07	7.43779e-06	Up
MSTRG_5939	89.7659	19.8186	56.1045	2.17315	0.551971	3.93707	8.24835e-05	0.000708306	Up
MSTRG_5996	1183.23	276.494	855.958	2.09725	0.391654	5.35486	8.56227e-08	1.9699e-06	Up
MSTRG_6010	48.2103	2.36753	16.1443	4.34891	1.75212	2.48209	0.0130614	0.0426864	Up
MSTRG_6062	8.44313	0.654812	4.32014	3.7888	1.4267	2.65565	0.0079156	0.028865	Up
MSTRG_6167	30.8341	0.508962	17.1398	5.80707	1.74296	3.33174	0.000863059	0.00488012	Up
MSTRG_6173	492.535	68.4863	208.163	2.84418	0.692144	4.10923	3.96974e-05	0.000380823	Up
MSTRG_6224	113.722	1.25669	46.444	6.54312	1.262	5.18472	2.16342e-07	4.42049e-06	Up
MSTRG_6256	1608.94	330.371	907.844	2.28392	0.504437	4.52766	5.96408e-06	7.64606e-05	Up
MSTRG_6333	621.239	91.4986	415.184	2.76454	0.82249	3.36119	0.000776087	0.00448228	Up
MSTRG_6335	36.5305	7.59156	17.9881	2.26417	0.619779	3.65319	0.000259006	0.0018071	Up
MSTRG_654	1479.14	367.318	750.664	2.00977	0.553174	3.63315	0.000279977	0.00192905	Up
MSTRG_6610	615.643	78.762	262.225	2.96657	0.589511	5.03226	4.84738e-07	8.83957e-06	Up
MSTRG_6654	174.469	9.14863	118.402	4.25418	1.15302	3.68961	0.0002246	0.00160526	Up
MSTRG_6712	48.9374	1.32769	17.041	5.1373	1.22007	4.21065	2.54639e-05	0.000263897	Up
MSTRG_6750	311.365	53.5502	217.505	2.54084	0.53174	4.77834	1.76746e-06	2.68489e-05	Up
MSTRG_6786	999.755	124.178	524.577	3.00863	0.705079	4.26709	1.98043e-05	0.000213442	Up
MSTRG_686	12.5997	1.9115	6.22312	2.79297	0.916392	3.04778	0.00230536	0.0108303	Up
MSTRG_6906	195.012	13.0301	82.79	3.90136	0.939888	4.15088	3.31198e-05	0.000327107	Up
MSTRG_6967	128.583	17.9977	102.268	2.83361	0.958165	2.95733	0.00310316	0.0137302	Up
MSTRG_7417	314.882	17.4131	135.111	4.17534	0.949856	4.39576	1.10384e-05	0.00012968	Up
MSTRG_7527	61.1451	13.6215	33.3886	2.14763	0.694018	3.09449	0.00197154	0.00957266	Up
MSTRG_7607	274.35	42.5261	219.686	2.69109	0.718259	3.74668	0.000179191	0.0013379	Up
MSTRG_7637	530.864	105.771	289.584	2.32894	0.478643	4.86571	1.14046e-06	1.85212e-05	Up
MSTRG_7672	7357.14	0	1851.67	15.4612	2.63029	5.87812	4.14952e-09	1.41555e-07	Up
MSTRG_7713	29.2852	4.25711	13.6465	2.7593	0.636866	4.33262	1.47342e-05	0.00016572	Up
MSTRG_7743	1010.99	10.3535	411.659	6.6228	1.05517	6.27654	3.46183e-10	1.61482e-08	Up
MSTRG_782	564.269	138.406	260.156	2.0276	0.720852	2.81278	0.0049115	0.0198053	Up
MSTRG_7875	30765.9	0.619523	12649.9	15.6545	1.30343	12.0103	3.13853e-33	1.06454e-29	Up
MSTRG_7904	463.609	66.464	217.179	2.79979	0.826257	3.38853	0.000702695	0.00413297	Up
MSTRG_793	110.375	0	51.6423	9.40255	1.85235	5.07602	3.85425e-07	7.28595e-06	Up
MSTRG_7960	9275.7	2205.27	5526.31	2.07252	0.47373	4.37489	1.21496e-05	0.000140923	Up
MSTRG_8033	18.0674	2.34754	7.18044	2.94318	1.0023	2.93644	0.00332007	0.0144958	Up
MSTRG_8209	376.449	37.8789	162.61	3.31368	0.896551	3.69603	0.000218999	0.00157566	Up
MSTRG_8255	242.915	2.84079	78.9099	6.45664	0.937653	6.88596	5.73973e-12	4.35394e-10	Up
MSTRG_8261	833.963	204.849	498.761	2.02693	0.352397	5.75184	8.82794e-09	2.75068e-07	Up
MSTRG_8391	981.348	192.456	528.342	2.35088	0.557904	4.21377	2.51147e-05	0.000261305	Up
MSTRG_8572	15.2643	0	6.18723	6.54941	1.68741	3.88133	0.000103885	0.000855254	Up
MSTRG_87	53.7703	2.38283	21.9292	4.50376	1.0643	4.23165	2.31984e-05	0.00024404	Up
MSTRG_8892	72.141	13.6358	50.644	2.40774	0.797418	3.01943	0.00253255	0.0116532	Up
MSTRG_9050	98.6808	13.592	62.4716	2.85833	1.15109	2.48315	0.0130227	0.0425883	Up
MSTRG_9079	68.3188	9.15525	31.0947	2.90341	1.1646	2.49305	0.0126651	0.0416549	Up
MSTRG_9218	237.499	55.0807	219.013	2.10842	0.813693	2.59118	0.00956487	0.03353	Up
MSTRG_9242	465.515	111.441	260.389	2.06207	0.595627	3.46202	0.00053614	0.00330073	Up
MSTRG_9283	242.114	53.3534	164.418	2.18354	0.565973	3.85803	0.000114303	0.00092593	Up
MSTRG_9401	986.423	194.894	557.82	2.33813	0.571713	4.08969	4.31947e-05	0.000407715	Up
MSTRG_9483	149.309	23.8766	73.9643	2.63998	0.581245	4.54194	5.57395e-06	7.20035e-05	Up
MSTRG_9536	292.829	33.3212	158.691	3.13558	0.797734	3.93061	8.47309e-05	0.000725484	Up
MSTRG_960	8415.54	1497.59	4133.62	2.49045	0.642299	3.87739	0.000105581	0.000867407	Up
MSTRG_9622	6.69481	0	2.17092	5.36136	1.76935	3.03014	0.00244442	0.0113311	Up
MSTRG_9659	29.841	4.03834	17.993	2.82523	0.723875	3.90292	9.50375e-05	0.000795934	Up
MSTRG_967	842.408	100.63	456.362	3.06567	0.860417	3.563	0.000366635	0.00240936	Up
MSTRG_9673	356.739	56.356	153.861	2.6638	0.761551	3.49786	0.000469012	0.00296741	Up
MSTRG_9677	170.289	13.5629	81.0338	3.65574	0.683214	5.35079	8.75695e-08	1.99727e-06	Up
MSTRG_9792	134.421	17.8982	59.1922	2.90475	1.02428	2.8359	0.00456961	0.0186452	Up
MSTRG_9796	508.901	66.2848	286.564	2.94116	1.185	2.48199	0.0130651	0.0426926	Up
MSTRG_9798	36.7742	1.58217	17.6951	4.48987	1.42766	3.14492	0.00166132	0.00833046	Up
MSTRG_984	91.5251	5.94942	32.2165	3.94899	0.851862	4.63571	3.55707e-06	4.88748e-05	Up
MSTRG_9906	2019.39	398.263	1288.61	2.34197	0.733606	3.19241	0.00141092	0.00729043	Up
MSTRG_9910	226.456	48.5593	114.508	2.21923	0.408874	5.42766	5.70975e-08	1.37213e-06	Up
MSTRG_9924	4470.29	581.882	2448.57	2.94169	0.772462	3.8082	0.000139984	0.00109438	Up
MSTRG_9997	71.5609	1.0732	30.6649	6.0083	1.53283	3.91975	8.86396e-05	0.000752169	Up
MSTRG_10023	77.231	836.262	238.936	-3.43575	0.924909	-3.71469	0.000203454	0.00148414	Down
MSTRG_10024	32.9541	249.451	135.542	-2.92301	0.854914	-3.41907	0.000628349	0.00376454	Down
MSTRG_10027	128.399	594.92	243.746	-2.2124	0.657131	-3.36676	0.000760577	0.00440663	Down
MSTRG_10045	156.778	964.265	472.709	-2.62069	0.676452	-3.87417	0.00010699	0.000877161	Down
MSTRG_1011	9.64693	302.021	256.219	-4.97401	0.947362	-5.25038	1.51785e-07	3.22634e-06	Down
MSTRG_10116	49.0332	294.003	151.222	-2.5861	0.481123	-5.37513	7.65271e-08	1.79721e-06	Down
MSTRG_10200	13.7895	55.6625	59.3847	-2.00745	0.552906	-3.63073	0.000282625	0.00194278	Down
MSTRG_1029	32.7184	404.602	159.901	-3.62943	0.410699	-8.83719	9.81552e-19	3.28239e-16	Down
MSTRG_10389	50.0282	224.785	273.926	-2.16807	0.852788	-2.54233	0.0110115	0.0374189	Down
MSTRG_10466	0.680851	16.5839	8.27569	-4.52979	1.69667	-2.66981	0.00758945	0.0279071	Down
MSTRG_10515	0.340425	238.493	60.7053	-9.20066	1.57604	-5.83784	5.28804e-09	1.756e-07	Down
MSTRG_10536	0	292.838	75.4955	-10.4585	2.38558	-4.38406	1.16487e-05	0.000135722	Down
MSTRG_10547	41.0837	185.8	108.528	-2.17716	0.745901	-2.91883	0.00351349	0.0151785	Down
MSTRG_10552	8.27392	59.6771	36.6473	-2.83743	0.875581	-3.24063	0.00119268	0.00636535	Down
MSTRG_1059	18.1662	88.6245	39.3685	-2.28402	0.912587	-2.5028	0.0123216	0.0408704	Down
MSTRG_1065	40.2845	232.146	183.903	-2.53077	0.584368	-4.33078	1.4858e-05	0.000167033	Down
MSTRG_10662	17.8371	495.524	151.745	-4.79904	1.07504	-4.46406	8.04214e-06	9.83743e-05	Down
MSTRG_10760	14.1961	63.8118	32.8696	-2.17307	0.800111	-2.71597	0.00660828	0.0249762	Down
MSTRG_10823	252.813	2070.97	834.962	-3.03442	0.504244	-6.01776	1.76852e-09	6.79945e-08	Down
MSTRG_1107	16.4179	1194.39	374.762	-6.19225	0.805289	-7.68947	1.47749e-14	1.99319e-12	Down
MSTRG_1109	19.4797	216.147	77.6589	-3.47384	0.964574	-3.60142	0.000316481	0.00213108	Down
MSTRG_1150	36.7017	568.107	192.1	-3.95256	0.94157	-4.19784	2.69468e-05	0.000276013	Down
MSTRG_1223	0	18.6783	4.76344	-6.48715	2.06719	-3.13815	0.00170016	0.0084965	Down
MSTRG_1227	2.32812	60.9158	16.126	-4.72818	1.09713	-4.3096	1.63551e-05	0.00018095	Down
MSTRG_1228	0	446.502	112.688	-11.067	1.91731	-5.77216	7.82605e-09	2.48083e-07	Down
MSTRG_1291	9.99135	88.6604	50.7476	-3.15355	1.15889	-2.72118	0.00650494	0.0246484	Down
MSTRG_1311	9.18948	136.431	50.7701	-3.89701	0.869333	-4.48276	7.3685e-06	9.13968e-05	Down
MSTRG_1337	42.3018	589.467	234.877	-3.79889	0.787519	-4.82387	1.40802e-06	2.21542e-05	Down
MSTRG_1392	192.436	1176.88	754.396	-2.61213	0.934706	-2.7946	0.00519641	0.0206698	Down
MSTRG_1395	215.645	2268.42	888.229	-3.39455	1.05406	-3.22045	0.00127988	0.00674844	Down
MSTRG_1397	0	70.6975	18.0075	-8.40778	2.2159	-3.79431	0.000148057	0.00114618	Down
MSTRG_1424	53.4567	1446.56	432.092	-4.75712	0.949572	-5.00975	5.44994e-07	9.81031e-06	Down
MSTRG_1510	38.25	198.609	147.633	-2.37764	0.591839	-4.01738	5.88486e-05	0.000528858	Down
MSTRG_1536	13.2679	122.536	41.5653	-3.21103	1.12892	-2.84434	0.0044504	0.0182529	Down
MSTRG_154	31.3689	176.796	86.0309	-2.49667	0.73619	-3.39134	0.000695528	0.00410386	Down
MSTRG_1632	27.892	152.687	67.1726	-2.45775	0.6761	-3.63519	0.000277778	0.00191612	Down
MSTRG_1716	110.721	573.039	356.606	-2.3714	0.798091	-2.97134	0.00296499	0.0132501	Down
MSTRG_1853	6.69281	45.1887	15.0089	-2.75	0.781979	-3.51672	0.00043692	0.00279995	Down
MSTRG_2046	23.3763	173.703	156.43	-2.89988	0.631104	-4.59494	4.32873e-06	5.80989e-05	Down
MSTRG_2181	16.8038	177.375	77.6907	-3.40735	0.846993	-4.02288	5.74909e-05	0.000518029	Down
MSTRG_2246	10955	46742.4	24293	-2.09314	0.761983	-2.74696	0.00601508	0.0232108	Down
MSTRG_2257	0.736368	12.8838	7.63634	-4.107	1.35555	-3.02976	0.00244745	0.0113407	Down
MSTRG_2316	0	52.4519	21.7207	-7.97692	1.97719	-4.03447	5.47263e-05	0.000497079	Down
MSTRG_2330	1.13231	13.2527	5.19868	-3.54733	1.45292	-2.44151	0.014626	0.0466499	Down
MSTRG_2481	0	3183.19	835.699	-13.9008	1.94909	-7.13192	9.89758e-13	8.608e-11	Down
MSTRG_2538	3.73736	274.417	70.5082	-6.19436	0.948321	-6.53193	6.49288e-11	3.64445e-09	Down
MSTRG_2607	0	43.0976	10.7744	-7.69399	1.90857	-4.03128	5.54746e-05	0.000502656	Down
MSTRG_2695	0	43.6893	25.0349	-7.71306	2.61604	-2.94837	0.00319456	0.0140721	Down
MSTRG_290	90.087	367.48	187.115	-2.02957	0.586643	-3.45963	0.000540912	0.00332717	Down
MSTRG_2920	24.9823	146.485	88.7353	-2.55358	0.586569	-4.35342	1.34032e-05	0.000153507	Down
MSTRG_297	26.014	281.59	154.785	-3.43906	1.12461	-3.05801	0.00222815	0.0105405	Down
MSTRG_2999	1.58776	18.5544	5.54794	-3.57896	1.30828	-2.73561	0.00622641	0.0238019	Down
MSTRG_3002	14.245	244.003	94.8596	-4.09748	0.601495	-6.81216	9.61459e-12	6.93858e-10	Down
MSTRG_3009	117.273	686.151	286.328	-2.5491	0.544869	-4.67837	2.89168e-06	4.0843e-05	Down
MSTRG_3074	51.7779	432.329	5441.49	-3.06233	0.970893	-3.15413	0.00160975	0.00811473	Down
MSTRG_3178	117.504	655.156	285.175	-2.47694	0.461948	-5.36195	8.23282e-08	1.91451e-06	Down
MSTRG_3227	1.13231	31.9325	8.42369	-4.8173	1.57206	-3.06432	0.00218163	0.0103701	Down
MSTRG_3232	0.791884	11.2406	6.27241	-3.88793	1.40762	-2.76206	0.00574372	0.022393	Down
MSTRG_3281	28.3963	147.513	93.0474	-2.38005	0.620678	-3.8346	0.00012577	0.00100005	Down
MSTRG_3547	0	55.147	202.852	-8.04836	1.67304	-4.81063	1.50457e-06	2.34249e-05	Down
MSTRG_3661	5.77991	37.3695	16.4883	-2.67784	1.05159	-2.54646	0.0108822	0.0370459	Down
MSTRG_3765	71.943	335.055	319.874	-2.21451	0.48044	-4.60934	4.03949e-06	5.46805e-05	Down
MSTRG_3880	32.4002	3687.61	1023.89	-6.82987	1.51515	-4.50771	6.553e-06	8.28476e-05	Down
MSTRG_3928	3.28989	43.9175	15.1584	-3.73067	1.43429	-2.60106	0.0092937	0.0327581	Down
MSTRG_3945	553.518	2759.04	1390.23	-2.31785	0.324044	-7.1529	8.49617e-13	7.67013e-11	Down
MSTRG_3950	39.3523	15856.3	5282.98	-8.65295	1.40688	-6.15045	7.72636e-10	3.26193e-08	Down
MSTRG_4117	0	45.9742	14.3315	-7.78558	1.58456	-4.91339	8.95135e-07	1.50412e-05	Down
MSTRG_4119	35.0567	266.161	109.868	-2.92608	0.771355	-3.79342	0.000148585	0.00114876	Down
MSTRG_4126	16.4667	259.711	1637.18	-3.98242	0.764589	-5.20857	1.90301e-07	3.93924e-06	Down
MSTRG_4220	29.3228	199.829	110.837	-2.76571	0.587194	-4.71005	2.47661e-06	3.56809e-05	Down
MSTRG_4372	10.2523	325.958	90.8921	-4.99133	1.49632	-3.33573	0.000850749	0.00482545	Down
MSTRG_4399	25.7257	118.061	60.4973	-2.2021	0.756301	-2.91167	0.00359499	0.0154434	Down
MSTRG_4441	0.397939	6936.69	2169.1	-14.0627	2.84542	-4.94221	7.72437e-07	1.32898e-05	Down
MSTRG_4445	0	15.9767	4.16164	-6.26203	1.73001	-3.61966	0.000294995	0.00201614	Down
MSTRG_4599	4.36335	333.476	100.069	-6.28394	0.883562	-7.11205	1.14333e-12	9.87129e-11	Down
MSTRG_4672	73.6841	802.473	232.264	-3.44549	0.885531	-3.89087	9.98862e-05	0.00082952	Down
MSTRG_4828	0	109.061	29.0351	-9.03337	2.02573	-4.45931	8.22236e-06	0.00010032	Down
MSTRG_4841	165.691	1143.52	439.853	-2.78541	0.370961	-7.50863	5.97512e-14	6.7879e-12	Down
MSTRG_4852	3.46243	32.656	9.95345	-3.24327	1.14966	-2.82106	0.00478651	0.0193869	Down
MSTRG_4921	119.735	522.383	929.139	-2.12584	0.44039	-4.82717	1.38488e-06	2.18479e-05	Down
MSTRG_4928	11.115	64.4519	26.1849	-2.52674	0.610615	-4.13803	3.50303e-05	0.000342556	Down
MSTRG_4945	10.1506	41.3356	20.2603	-2.0171	0.807898	-2.49672	0.0125347	0.0413522	Down
MSTRG_495	23.7001	111.731	61.5489	-2.24176	0.546964	-4.09855	4.15754e-05	0.000395008	Down
MSTRG_5246	74.3835	343.179	162.246	-2.20643	0.526803	-4.18833	2.8101e-05	0.000285373	Down
MSTRG_5257	32.9884	178.517	135.473	-2.43794	0.53178	-4.58448	4.55114e-06	6.05365e-05	Down
MSTRG_5265	2.32613	42.1452	43.5647	-4.18825	1.50818	-2.77702	0.00548606	0.0215844	Down
MSTRG_5267	0.791884	262.017	68.7298	-8.40943	1.63896	-5.13097	2.88256e-07	5.64692e-06	Down
MSTRG_5355	179.501	963.763	435.627	-2.42423	0.402387	-6.02463	1.69499e-09	6.54375e-08	Down
MSTRG_5483	41.1386	842.277	234.725	-4.3544	0.814564	-5.34569	9.00754e-08	2.04852e-06	Down
MSTRG_5524	1.53025	19.5963	11.033	-3.69349	1.00834	-3.66294	0.000249341	0.00175306	Down
MSTRG_5578	0	6.16627	2.59298	-4.88877	1.74247	-2.80565	0.00502147	0.0201325	Down
MSTRG_5599	3.18152	93.926	24.6319	-4.90166	1.35231	-3.62465	0.000289355	0.00198215	Down
MSTRG_5675	19.714	183.077	84.0303	-3.21205	0.639246	-5.02475	5.04095e-07	9.14341e-06	Down
MSTRG_5695	229.173	3091.33	2629.28	-3.75388	0.603039	-6.22494	4.8174e-10	2.16628e-08	Down
MSTRG_5798	0	13.6755	3.89199	-6.0385	1.8339	-3.29272	0.000992234	0.00546857	Down
MSTRG_5957	4.82813	702.725	183.554	-7.18302	1.49555	-4.80292	1.5637e-06	2.42373e-05	Down
MSTRG_6004	2.66855	17.0414	9.41721	-2.6879	1.01104	-2.65856	0.00784758	0.0286824	Down
MSTRG_601	1.52825	42.1312	12.5869	-4.79099	1.62561	-2.94719	0.00320676	0.014105	Down
MSTRG_6017	118.635	693.226	327.605	-2.54591	0.457105	-5.56963	2.55284e-08	6.86433e-07	Down
MSTRG_6106	25.9112	266.66	104.428	-3.35486	0.531333	-6.31404	2.71846e-10	1.31342e-08	Down
MSTRG_617	4.93716	21.5611	19.6071	-2.13377	0.590437	-3.61388	0.000301654	0.00204985	Down
MSTRG_62	4.87366	103.379	28.1299	-4.40504	0.800767	-5.50102	3.77594e-08	9.61126e-07	Down
MSTRG_6200	13.3856	131.273	61.6867	-3.29153	0.752753	-4.37266	1.2274e-05	0.000142296	Down
MSTRG_6352	6.69481	30.0588	12.4429	-2.15923	0.797433	-2.70772	0.00677469	0.0254834	Down
MSTRG_6382	79.9015	664.422	387.336	-3.05771	0.349814	-8.74097	2.31118e-18	6.8593e-16	Down
MSTRG_6400	6.29753	28.2191	12.3707	-2.18187	0.898183	-2.4292	0.0151321	0.0478214	Down
MSTRG_6459	77.0933	360.453	186.983	-2.22443	0.707962	-3.14202	0.00167787	0.00840101	Down
MSTRG_648	0	37.3412	15.042	-7.48792	2.02508	-3.69758	0.000217662	0.00156699	Down
MSTRG_6492	5.21608	21.1693	11.2126	-2.00694	0.666573	-3.01084	0.00260525	0.0119299	Down
MSTRG_6495	58.6076	279.073	181.038	-2.25149	0.808634	-2.78431	0.00536424	0.0211742	Down
MSTRG_6515	197.184	1386.9	468.331	-2.81373	0.39417	-7.13836	9.44508e-13	8.3366e-11	Down
MSTRG_6529	0	52.3863	14.2563	-7.97577	1.97623	-4.03585	5.44053e-05	0.000494543	Down
MSTRG_6741	70.8544	384.85	271.215	-2.44194	0.509587	-4.792	1.65125e-06	2.54087e-05	Down
MSTRG_6778	0.340425	33.3096	10.5895	-6.3618	1.87684	-3.38963	0.000699869	0.00412128	Down
MSTRG_6892	32.3693	133.961	94.6326	-2.04696	0.570963	-3.5851	0.000336949	0.00223907	Down
MSTRG_7019	10.9511	56.8366	33.6073	-2.37934	0.914774	-2.60101	0.009295	0.0327581	Down
MSTRG_7065	233.034	953.233	421.316	-2.0314	0.360609	-5.63325	1.76842e-08	5.02846e-07	Down
MSTRG_7069	16.8387	101.869	33.1495	-2.60054	0.779443	-3.33641	0.000848684	0.00481651	Down
MSTRG_7111	298.326	1283.32	606.803	-2.10409	0.388811	-5.41161	6.24618e-08	1.49499e-06	Down
MSTRG_7126	37.9577	175.573	80.0591	-2.20858	0.44124	-5.00539	5.57494e-07	1.00125e-05	Down
MSTRG_7147	133.496	2456.65	969.179	-4.20206	0.793967	-5.29249	1.20663e-07	2.64534e-06	Down
MSTRG_7179	106.257	778.345	245.096	-2.87281	0.996685	-2.88237	0.00394696	0.0166275	Down
MSTRG_7249	35.9667	376.778	131.644	-3.39409	0.571985	-5.93388	2.95864e-09	1.05953e-07	Down
MSTRG_7354	241.18	1505.5	898.69	-2.64244	0.642072	-4.11549	3.86355e-05	0.000371236	Down
MSTRG_7399	0.397939	6.66186	2.92225	-4.03373	1.66585	-2.42142	0.0154599	0.048592	Down
MSTRG_7407	0.397939	9.60851	4.55024	-4.5616	1.73866	-2.62363	0.00869988	0.0310852	Down
MSTRG_7430	0.680851	39.6772	15.4498	-5.77362	1.53118	-3.77069	0.000162796	0.00123926	Down
MSTRG_7463	3.51795	27.2603	8.01554	-2.97245	1.00242	-2.96528	0.00302406	0.0134483	Down
MSTRG_750	0.680851	86.9516	50.8838	-6.88923	1.3403	-5.14008	2.74625e-07	5.42013e-06	Down
MSTRG_7500	1.75764	63.5646	23.6208	-5.1455	1.50202	-3.42572	0.000613181	0.00368763	Down
MSTRG_7543	4.58476	123.789	51.475	-4.7618	1.02179	-4.66026	3.15803e-06	4.40771e-05	Down
MSTRG_7724	36.5059	245.204	125.222	-2.74605	0.740247	-3.70964	0.000207557	0.00150658	Down
MSTRG_7726	3.85438	43.2587	17.9239	-3.50498	0.782978	-4.47648	7.58843e-06	9.35958e-05	Down
MSTRG_7741	3.23038	49.7137	19.5609	-3.91058	0.842421	-4.64207	3.44936e-06	4.75598e-05	Down
MSTRG_7758	156.8	879.972	334.965	-2.48782	0.706301	-3.52233	0.000427776	0.00275174	Down
MSTRG_7871	1.13231	94.8692	44.3394	-6.39093	1.71574	-3.72489	0.000195401	0.00143591	Down
MSTRG_7895	106.552	475.772	293.514	-2.15826	0.608041	-3.54952	0.000385928	0.00251238	Down
MSTRG_7941	0.795878	190.34	48.2218	-7.95757	1.37908	-5.77021	7.9171e-09	2.49752e-07	Down
MSTRG_8107	1.52825	45.1549	19.363	-4.89927	0.996486	-4.91654	8.80865e-07	1.48454e-05	Down
MSTRG_8108	23.4794	142.431	86.8823	-2.59922	0.484921	-5.36008	8.31833e-08	1.92873e-06	Down
MSTRG_8128	2.44049	201.349	64.167	-6.3137	0.981896	-6.43011	1.27507e-10	6.56705e-09	Down
MSTRG_8129	16.3893	110.625	52.8168	-2.75938	0.585341	-4.71415	2.42726e-06	3.50977e-05	Down
MSTRG_8137	27.228	151.872	82.6879	-2.47679	0.651071	-3.80418	0.000142276	0.00110893	Down
MSTRG_8165	53.0325	882.53	318.055	-4.05813	1.04347	-3.88908	0.000100626	0.000834787	Down
MSTRG_820	10.9485	465.938	155.761	-5.40331	0.819886	-6.59032	4.38891e-11	2.57299e-09	Down
MSTRG_8220	14.2945	86.0089	36.2999	-2.58919	0.800819	-3.23317	0.00122425	0.00651441	Down
MSTRG_8232	4.99667	54.4737	15.0876	-3.45725	0.860235	-4.01896	5.84548e-05	0.000525518	Down
MSTRG_8265	30.2952	162.39	59.6651	-2.42189	0.716776	-3.37886	0.000727871	0.00425451	Down
MSTRG_83	0	26.5454	7.86818	-6.994	2.1093	-3.31579	0.000913844	0.00510167	Down
MSTRG_8318	184.96	1140.46	666.643	-2.62454	0.516271	-5.08364	3.70266e-07	7.02735e-06	Down
MSTRG_8386	0.736368	987.159	262.565	-10.3722	1.68646	-6.15028	7.73477e-10	3.26193e-08	Down
MSTRG_8414	80.8516	385.099	230.533	-2.25204	0.479677	-4.6949	2.66735e-06	3.8029e-05	Down
MSTRG_8421	68.4217	286.602	177.208	-2.06461	0.602671	-3.42576	0.000613087	0.00368763	Down
MSTRG_845	93.2715	390.667	177.826	-2.065	0.592763	-3.48369	0.000494549	0.00309981	Down
MSTRG_855	331.345	2463.11	1119.76	-2.89394	0.601053	-4.81478	1.47364e-06	2.30189e-05	Down
MSTRG_8655	17.5924	83.5543	61.8568	-2.2489	0.622696	-3.61155	0.000304373	0.00206527	Down
MSTRG_8738	11.1612	238.61	70.5147	-4.42236	0.971511	-4.55205	5.31263e-06	6.90409e-05	Down
MSTRG_8784	2.38763	83.2646	45.9688	-5.15282	1.20432	-4.27861	1.88065e-05	0.000203985	Down
MSTRG_8805	983.929	4397.88	2677.35	-2.16014	0.691796	-3.12251	0.00179315	0.00888084	Down
MSTRG_8953	0	58.4602	82.5179	-8.13408	2.49005	-3.26663	0.00108835	0.00591321	Down
MSTRG_8971	48.1383	228.334	109.9	-2.24889	0.756009	-2.97469	0.00293286	0.0131263	Down
MSTRG_9072	0	1729.95	1265.32	-13.021	1.38499	-9.40151	5.37847e-21	3.00989e-18	Down
MSTRG_9091	128.719	531.76	371.189	-2.04372	0.426345	-4.79359	1.63819e-06	2.52533e-05	Down
MSTRG_9135	0.738364	14.7833	5.95728	-4.31468	1.55535	-2.7741	0.00553549	0.021731	Down
MSTRG_9158	46.1684	561.607	200.376	-3.60392	0.930992	-3.87106	0.000108365	0.000885531	Down
MSTRG_9162	23.7048	145.868	77.4057	-2.61972	0.692052	-3.78543	0.000153441	0.00118092	Down
MSTRG_9183	9.25632	59.4836	37.4629	-2.68136	0.72183	-3.71468	0.000203465	0.00148414	Down
MSTRG_923	1.3617	293.489	96.3785	-7.6941	1.49074	-5.16127	2.45284e-07	4.93123e-06	Down
MSTRG_9272	128.765	894.483	413.888	-2.79646	0.900105	-3.10681	0.00189117	0.00926318	Down
MSTRG_9351	33.3713	174.537	76.3315	-2.38569	0.641309	-3.72003	0.000199203	0.00146023	Down
MSTRG_9405	636.168	4629.26	1943.4	-2.8632	0.565514	-5.063	4.12709e-07	7.65393e-06	Down
MSTRG_947	0	24.3119	6.07797	-6.86852	2.73418	-2.51209	0.0120017	0.0400613	Down
MSTRG_953	8.45445	125.109	40.5183	-3.88055	0.901275	-4.30563	1.66515e-05	0.000183375	Down
MSTRG_9530	46.972	204.338	111.766	-2.1223	0.667221	-3.18081	0.00146865	0.00753268	Down
MSTRG_9532	1.47473	21.1274	13.9576	-3.82283	1.14479	-3.33934	0.00083979	0.00477584	Down
MSTRG_9790	57.231	320.211	388.449	-2.48329	0.527838	-4.70465	2.54305e-06	3.65053e-05	Down

## Sheet: Table S7 SEP vs AUG
Name	SEP	AUG	BaseMean	log2FC	lfcSE	Stat	Pvalue	FDR	Threshold
MSTRG_1464	45.2903	4.33136	19.1305	3.39207	1.00392	3.37883	0.000727962	0.0495462	Up
MSTRG_2454	509.298	24.4147	405.447	4.37911	1.05579	4.14772	3.35805e-05	0.00574172	Up
MSTRG_3334	78.647	17.9874	47.7405	2.13455	0.620934	3.43765	0.000586795	0.0426261	Up
MSTRG_3721	4227.44	6.63773	3476.01	9.31762	1.77387	5.25271	1.49881e-07	6.70672e-05	Up
MSTRG_8373	80854.7	2856.2	21525.4	4.8231	0.678213	7.11148	1.14808e-12	4.02421e-09	Up
MSTRG_1228	0	4.24821	112.688	-18.8181	3.9456	-4.76938	1.84791e-06	0.000555192	Down
MSTRG_2198	0	1.50178	81.8193	-17.4094	4.29814	-4.05045	5.1119e-05	0.00814458	Down
MSTRG_4441	2.79269	1736.54	2169.1	-9.27147	2.73216	-3.39346	0.000690163	0.0479037	Down
MSTRG_9272	63.0758	569.226	413.888	-3.17356	0.855002	-3.71176	0.000205825	0.0218899	Down

## Sheet: Table S7 NOV vs AUG
Name	NOV	AUG	BaseMean	log2FC	lfcSE	Stat	Pvalue	FDR	Threshold
MSTRG_1003	1573.66	349.388	658.306	2.17097	0.706136	3.07443	0.00210903	0.0213124	Up
MSTRG_10168	165.434	28.9742	73.6238	2.50959	0.821011	3.0567	0.00223786	0.0222487	Up
MSTRG_10273	540.56	92.2026	263.124	2.552	0.805849	3.16684	0.00154103	0.0169244	Up
MSTRG_10736	2358.59	458.337	1063.47	2.36327	0.709331	3.33168	0.000863223	0.0110569	Up
MSTRG_1271	17896	368.985	10996.3	5.59985	1.87055	2.99369	0.00275627	0.0259759	Up
MSTRG_135	153.911	36.6096	77.6581	2.06846	0.678616	3.04805	0.00230328	0.0226193	Up
MSTRG_1404	3652.93	655.941	1942.93	2.47734	0.828745	2.98927	0.00279645	0.0262665	Up
MSTRG_1420	119.971	17.2799	47.798	2.79915	0.462043	6.0582	1.37652e-09	1.65662e-07	Up
MSTRG_1552	131.049	20.4571	58.506	2.67981	0.966984	2.77131	0.00558311	0.0428013	Up
MSTRG_1641	27.6113	4.89015	12.4094	2.47242	0.880154	2.80908	0.00496839	0.0394233	Up
MSTRG_1712	17.4019	2.0048	7.74525	3.06643	0.962929	3.18448	0.00145013	0.0162053	Up
MSTRG_1961	886.56	18.7528	311.258	5.55999	1.10529	5.03034	4.89607e-07	2.79285e-05	Up
MSTRG_2136	9694.67	1937.03	4117.12	2.32334	0.784486	2.96161	0.00306039	0.0278335	Up
MSTRG_2198	325.775	1.50178	81.8193	7.84262	1.6832	4.65935	3.1721e-06	0.000134021	Up
MSTRG_2357	20.6389	4.1232	7.63012	2.34476	0.794251	2.95216	0.0031556	0.02861	Up
MSTRG_2446	338.767	80.3882	159.103	2.07775	0.513003	4.05018	5.11788e-05	0.00125841	Up
MSTRG_2454	975.041	24.4147	405.447	5.31484	0.898202	5.9172	3.27467e-09	3.37083e-07	Up
MSTRG_2478	9866.05	2142.74	4308.97	2.20306	0.656382	3.35637	0.000789722	0.0104402	Up
MSTRG_2565	31.8909	7.27759	16.0006	2.12486	0.632112	3.36151	0.000775163	0.0103219	Up
MSTRG_2569	123.258	25.7603	57.0023	2.25901	0.66213	3.41172	0.000645535	0.00897959	Up
MSTRG_2586	2860.24	650.99	1492.74	2.13541	0.423513	5.04213	4.60373e-07	2.6394e-05	Up
MSTRG_3014	2261.99	460.969	1062.67	2.29495	0.712764	3.21979	0.00128284	0.0148676	Up
MSTRG_302	23.6366	2.91785	10.1117	3.06931	0.718986	4.26894	1.96405e-05	0.00060268	Up
MSTRG_3047	88.5583	22.0868	44.6109	2.0234	0.490469	4.12544	3.70031e-05	0.000972126	Up
MSTRG_3135	32.1705	6.98066	14.9416	2.19781	0.640769	3.42996	0.000603661	0.00852276	Up
MSTRG_3244	540.455	78.0785	238.732	2.7875	0.604199	4.61354	3.95861e-06	0.000160657	Up
MSTRG_3283	23.3643	0.750891	11.2456	5.14981	1.45185	3.54708	0.000389531	0.00608332	Up
MSTRG_3625	18.379	2.00224	10.2681	3.14508	0.965206	3.25845	0.00112021	0.0134651	Up
MSTRG_3718	13.3963	0	3.98162	6.29542	1.91713	3.28378	0.00102426	0.0125925	Up
MSTRG_3721	9646.58	6.63773	3476.01	10.5082	1.65509	6.34906	2.16637e-10	3.10504e-08	Up
MSTRG_3881	5.77458	0	3.22932	5.07856	1.83967	2.76058	0.00576984	0.043671	Up
MSTRG_41	76.7196	8.0471	42.5229	3.23602	0.96482	3.35401	0.000796491	0.010499	Up
MSTRG_4294	10.2001	0	4.46617	5.90678	1.8275	3.23217	0.00122853	0.0144002	Up
MSTRG_4516	126.724	30.3721	70.4157	2.05436	0.464367	4.42401	9.68874e-06	0.000338076	Up
MSTRG_457	146.898	35.5504	66.7864	2.04502	0.638051	3.2051	0.00135015	0.0153646	Up
MSTRG_4708	160.672	17.1891	72.6162	3.22181	0.670183	4.80736	1.52935e-06	7.18542e-05	Up
MSTRG_4800	96.1368	16.3421	36.5637	2.55127	0.838335	3.04326	0.00234033	0.0228839	Up
MSTRG_4904	809.948	113.534	405.318	2.83416	0.446762	6.34379	2.24185e-10	3.19301e-08	Up
MSTRG_5293	14971.4	1734.51	8831.52	3.10963	0.790695	3.93278	8.39699e-05	0.00184083	Up
MSTRG_5444	38169.4	3433.87	15393.2	3.47448	1.05129	3.30499	0.000949809	0.0118705	Up
MSTRG_5537	836.129	172.378	424.639	2.27781	0.361465	6.30161	2.94561e-10	4.11767e-08	Up
MSTRG_5668	57.8507	13.6618	33.7057	2.07967	0.709576	2.93086	0.00338027	0.0300784	Up
MSTRG_5854	119.77	19.0012	63.6984	2.66668	0.822838	3.24084	0.0011918	0.0140549	Up
MSTRG_5977	576.587	76.0013	375.811	2.92588	0.574209	5.0955	3.47831e-07	2.07289e-05	Up
MSTRG_6173	492.535	65.3985	208.163	2.91245	0.693533	4.19945	2.67566e-05	0.000754584	Up
MSTRG_6610	615.643	100.998	262.225	2.60578	0.671919	3.87811	0.000105272	0.00220023	Up
MSTRG_6906	195.012	22.1035	82.79	3.13573	1.07192	2.92534	0.00344078	0.030509	Up
MSTRG_6952	1385.74	293.24	1100.13	2.2401	0.584402	3.83315	0.000126514	0.00252427	Up
MSTRG_6983	142.378	31.029	68.579	2.19559	0.704557	3.11626	0.00183158	0.019301	Up
MSTRG_7009	36.6349	8.7975	23.3203	2.0474	0.488239	4.19343	2.74766e-05	0.000772963	Up
MSTRG_7448	40.2835	9.71054	23.0356	2.06295	0.702375	2.9371	0.00331294	0.0297102	Up
MSTRG_7672	7357.14	0.294367	1851.67	14.4359	2.40359	6.00598	1.90184e-09	2.12163e-07	Up
MSTRG_782	564.269	138.328	260.156	2.02631	0.736039	2.75299	0.00590531	0.0443609	Up
MSTRG_8209	376.449	30.7493	162.61	3.60832	0.863794	4.17729	2.94998e-05	0.00081669	Up
MSTRG_8255	242.915	14.9643	78.9099	4.01752	1.28704	3.12151	0.00179924	0.019064	Up
MSTRG_8266	631.355	103.175	263.132	2.60839	0.339943	7.67304	1.67969e-14	7.1479e-12	Up
MSTRG_837	279.254	56.1877	143.088	2.31113	0.400586	5.76937	7.95681e-09	7.29514e-07	Up
MSTRG_8914	404.278	10.9501	142.877	5.18636	0.676085	7.67116	1.70444e-14	7.1479e-12	Up
MSTRG_8927	1785.39	142.351	851.84	3.65003	0.557995	6.54134	6.09705e-11	1.12255e-08	Up
MSTRG_9079	68.3188	5.24027	31.0947	3.68763	1.09806	3.35832	0.000784184	0.0103973	Up
MSTRG_9465	46.0109	7.78524	20.3514	2.54666	0.639241	3.98388	6.78001e-05	0.00157155	Up
MSTRG_9483	149.309	37.2661	73.9643	2.00047	0.709705	2.81873	0.00482133	0.0385673	Up
MSTRG_960	8415.54	1504.14	4133.62	2.48407	0.658676	3.7713	0.000162396	0.00306725	Up
MSTRG_9781	6.69281	0	4.39868	5.29785	1.68862	3.13739	0.00170459	0.0183383	Up
MSTRG_9792	134.421	11.1984	59.1922	3.57867	0.952848	3.75576	0.000172819	0.00322377	Up
MSTRG_9798	36.7742	2.357	17.6951	3.99662	1.47071	2.71747	0.00657824	0.0475793	Up
MSTRG_984	91.5251	5.13338	32.2165	4.15156	0.8396	4.94469	7.62668e-07	4.04482e-05	Up
MSTRG_1011	9.64693	589.899	256.219	-5.9415	0.823759	-7.21267	5.48666e-13	1.5728e-10	Down
MSTRG_10200	13.7895	95.956	59.3847	-2.79576	0.548746	-5.09481	3.49087e-07	2.07492e-05	Down
MSTRG_10389	50.0282	514.173	273.926	-3.36149	0.853688	-3.9376	8.22991e-05	0.00181652	Down
MSTRG_10531	358.081	1570.62	874.243	-2.13322	0.606235	-3.51881	0.000433491	0.00661958	Down
MSTRG_10552	8.27392	57.9653	36.6473	-2.79479	0.896068	-3.11895	0.00181494	0.0191703	Down
MSTRG_1065	40.2845	276.1	183.903	-2.78257	0.574468	-4.84373	1.27425e-06	6.15282e-05	Down
MSTRG_1107	16.4179	190.482	374.762	-3.5398	1.20492	-2.93779	0.00330561	0.029665	Down
MSTRG_1228	0	4.24821	112.688	-18.6716	3.96726	-4.70642	2.52107e-06	0.000111291	Down
MSTRG_1392	192.436	1333.11	754.396	-2.79189	0.931966	-2.99569	0.00273821	0.0258804	Down
MSTRG_1510	38.25	241.166	147.633	-2.65646	0.555322	-4.78364	1.7215e-06	8.02161e-05	Down
MSTRG_1716	110.721	627.245	356.606	-2.50178	0.789387	-3.16927	0.00152822	0.0168082	Down
MSTRG_1752	5.44348	25.7819	18.372	-2.21721	0.762302	-2.90857	0.00363083	0.0316124	Down
MSTRG_181	191.255	931.479	452.173	-2.28369	0.377886	-6.04332	1.50976e-09	1.78073e-07	Down
MSTRG_2046	23.3763	255.198	156.43	-3.45561	0.615201	-5.61704	1.94252e-08	1.64758e-06	Down
MSTRG_2257	0.736368	10.1346	7.63634	-3.75936	1.38381	-2.71668	0.00659408	0.0476358	Down
MSTRG_2316	0	30.397	21.7207	-7.19074	2.13707	-3.36477	0.00076608	0.0102357	Down
MSTRG_2481	0	148.795	835.699	-9.48189	2.47663	-3.82855	0.000128901	0.00256061	Down
MSTRG_2541	0.736368	10.2115	4.91877	-3.78215	1.396	-2.70928	0.00674293	0.0484404	Down
MSTRG_2695	0	45.4188	25.0349	-7.77072	2.66896	-2.91152	0.0035968	0.0314491	Down
MSTRG_2920	24.9823	105.724	88.7353	-2.08443	0.649441	-3.20957	0.00132934	0.0152272	Down
MSTRG_297	26.014	249.174	154.785	-3.26223	1.16875	-2.79122	0.00525094	0.041088	Down
MSTRG_3002	14.245	86.4384	94.8596	-2.60176	0.924008	-2.81573	0.00486668	0.0388242	Down
MSTRG_3074	51.7779	13284	5441.49	-8.00354	1.37015	-5.84137	5.17729e-09	4.98914e-07	Down
MSTRG_3281	28.3963	118.799	93.0474	-2.06848	0.668854	-3.09258	0.00198428	0.0204347	Down
MSTRG_3547	0	666.225	202.852	-11.6444	1.47486	-7.89525	2.89745e-15	1.52595e-12	Down
MSTRG_3765	71.943	406.062	319.874	-2.4931	0.510468	-4.88396	1.03977e-06	5.22097e-05	Down
MSTRG_3950	39.3523	4666.86	5282.98	-6.88874	1.61362	-4.26911	1.96251e-05	0.00060268	Down
MSTRG_4117	0	9.33047	14.3315	-5.48777	2.00304	-2.73972	0.00614916	0.0455674	Down
MSTRG_4126	16.4667	2316.24	1637.18	-7.13761	1.22211	-5.84041	5.20724e-09	4.99674e-07	Down
MSTRG_4220	29.3228	151.956	110.837	-2.3722	0.678249	-3.49754	0.000469575	0.00705172	Down
MSTRG_4441	0.397939	1736.54	2169.1	-12.1226	2.72525	-4.44825	8.65746e-06	0.000309727	Down
MSTRG_4921	119.735	1607.35	929.139	-3.74675	0.639134	-5.86222	4.56712e-09	4.48882e-07	Down
MSTRG_5257	32.9884	199.647	135.473	-2.5985	0.520584	-4.99152	5.99071e-07	3.28488e-05	Down
MSTRG_5410	55.2284	243.342	171.942	-2.14027	0.43308	-4.94196	7.73392e-07	4.08257e-05	Down
MSTRG_5524	1.53025	15.803	11.033	-3.38074	1.05075	-3.21746	0.00129329	0.0149276	Down
MSTRG_5695	229.173	5214.08	2629.28	-4.50818	0.486433	-9.26784	1.89962e-20	2.38993e-17	Down
MSTRG_6115	4.60073	45.6126	19.5438	-3.31862	0.868357	-3.82172	0.000132522	0.00260965	Down
MSTRG_617	4.93716	27.558	19.6071	-2.4772	0.581706	-4.25851	2.05796e-05	0.000627248	Down
MSTRG_6200	13.3856	80.8159	61.6867	-2.59254	0.905838	-2.86203	0.00420939	0.0351756	Down
MSTRG_6382	79.9015	464.212	387.336	-2.53978	0.457336	-5.55343	2.80122e-08	2.29842e-06	Down
MSTRG_648	0	22.1695	15.042	-6.73253	2.1638	-3.11144	0.0018618	0.0195313	Down
MSTRG_6702	8400.32	734322	351936	-6.44979	1.5274	-4.22271	2.4138e-05	0.000706239	Down
MSTRG_6741	70.8544	381.228	271.215	-2.42843	0.520294	-4.66741	3.05014e-06	0.000130821	Down
MSTRG_7101	68.6049	323.344	227.136	-2.23639	0.567039	-3.94397	8.01435e-05	0.00178109	Down
MSTRG_7147	133.496	963.049	969.179	-2.85085	1.02542	-2.78017	0.00543305	0.0420064	Down
MSTRG_7312	29.6765	146.829	76.1376	-2.3079	0.483593	-4.7724	1.82041e-06	8.39612e-05	Down
MSTRG_7354	241.18	1082.35	898.69	-2.166	0.701681	-3.08687	0.00202275	0.0206898	Down
MSTRG_750	0.680851	93.4291	50.8838	-6.99205	1.33431	-5.24022	1.60389e-07	1.04673e-05	Down
MSTRG_7543	4.58476	45.6963	51.475	-3.31991	1.19133	-2.78673	0.00532435	0.0414633	Down
MSTRG_7744	242.271	1225.68	1324.1	-2.33882	0.854224	-2.73795	0.0061824	0.045709	Down
MSTRG_7871	1.13231	76.5381	44.3394	-6.08002	1.7746	-3.42614	0.000612228	0.0086115	Down
MSTRG_8107	1.52825	16.7836	19.363	-3.45934	1.15984	-2.9826	0.00285811	0.0266138	Down
MSTRG_8108	23.4794	119.187	86.8823	-2.34116	0.545769	-4.28965	1.78955e-05	0.000560528	Down
MSTRG_8128	2.44049	41.5324	64.167	-4.05858	1.40881	-2.88086	0.00396594	0.0337578	Down
MSTRG_8177	144.542	1731.84	1166.19	-3.58295	0.851424	-4.20819	2.57428e-05	0.000734222	Down
MSTRG_820	10.9485	114.513	155.761	-3.38254	1.18122	-2.86359	0.00418864	0.035054	Down
MSTRG_8318	184.96	976.226	666.643	-2.40029	0.581794	-4.12566	3.69669e-05	0.000972126	Down
MSTRG_8386	0.736368	49.732	262.565	-6.06466	2.15005	-2.82071	0.00479174	0.0383984	Down
MSTRG_8679	55.5362	247.672	152.238	-2.15475	0.39388	-5.47058	4.48561e-08	3.47881e-06	Down
MSTRG_8784	2.38763	67.8503	45.9688	-4.85545	1.26236	-3.84631	0.000119909	0.00241374	Down
MSTRG_8805	983.929	4107.06	2677.35	-2.06142	0.727171	-2.83486	0.00458462	0.0372394	Down
MSTRG_8953	0	230.865	82.5179	-10.1151	2.45519	-4.11989	3.79059e-05	0.000991245	Down
MSTRG_9072	0	2144.2	1265.32	-13.3307	1.37956	-9.66305	4.32772e-22	7.53889e-19	Down
MSTRG_9183	9.25632	48.9619	37.4629	-2.39621	0.764229	-3.13545	0.00171588	0.018451	Down
MSTRG_923	1.3617	85.7555	96.3785	-5.93271	1.77355	-3.3451	0.000822536	0.0107176	Down
MSTRG_9532	1.47473	28.1282	13.9576	-4.23642	1.06254	-3.98706	6.68983e-05	0.00155702	Down
MSTRG_9790	57.231	358.895	388.449	-2.64802	0.571919	-4.63005	3.65576e-06	0.000150798	Down
MSTRG_9959	10.2161	125.246	51.7217	-3.59598	0.513508	-7.00276	2.50966e-12	5.85915e-10	Down
MSTRG_9979	2.89195	13.2611	8.05951	-2.16457	0.747202	-2.8969	0.00376871	0.0324757	Down

## Sheet: Table S7 NOV vs SEP
Name	NOV	SEP	BaseMean	log2FC	lfcSE	Stat	Pvalue	FDR	Threshold
MSTRG_10169	547.695	54.7953	259.127	3.3226	0.965294	3.44206	0.000577304	0.0203243	Up
MSTRG_1822	22.6855	0.673745	12.7152	5.06927	1.34605	3.76603	0.000165866	0.00786708	Up
MSTRG_2198	325.775	0	81.8193	10.7638	2.01046	5.35391	8.60722e-08	1.65783e-05	Up
MSTRG_6036	204.198	29.9051	93.425	2.76943	0.554979	4.99016	6.03299e-07	8.56607e-05	Up
MSTRG_7672	7357.14	49.2275	1851.67	7.22426	1.07312	6.73203	1.67313e-11	1.00162e-08	Up
MSTRG_8266	631.355	151.741	263.132	2.05667	0.397635	5.17225	2.31294e-07	3.79493e-05	Up
MSTRG_1011	9.64693	123.309	256.219	-3.68485	0.778168	-4.73529	2.18745e-06	0.00025693	Down
MSTRG_10200	13.7895	72.1307	59.3847	-2.38336	0.594298	-4.01037	6.06232e-05	0.0037094	Down
MSTRG_1065	40.2845	187.082	183.903	-2.21946	0.565316	-3.92604	8.6354e-05	0.00474626	Down
MSTRG_2046	23.3763	173.442	156.43	-2.89917	0.634168	-4.57162	4.83969e-06	0.000505657	Down
MSTRG_3074	51.7779	7997.84	5441.49	-7.2715	1.43504	-5.06712	4.03887e-07	5.96406e-05	Down
MSTRG_3547	0	90.0366	202.852	-8.7573	1.76853	-4.95174	7.35536e-07	9.99517e-05	Down
MSTRG_3765	71.943	466.437	319.874	-2.69241	0.485874	-5.54136	3.00127e-08	6.51745e-06	Down
MSTRG_4126	16.4667	3956.3	1637.18	-7.91033	1.09467	-7.22621	4.96662e-13	4.01388e-10	Down
MSTRG_4921	119.735	1467.09	929.139	-3.61495	0.655528	-5.51456	3.49651e-08	7.4469e-06	Down
MSTRG_5265	2.32613	107.8	43.5647	-5.5463	1.42326	-3.8969	9.74329e-05	0.00518264	Down
MSTRG_5283	1102.19	6306.42	2685.33	-2.5164	0.586631	-4.28959	1.79007e-05	0.00147948	Down
MSTRG_5695	229.173	1982.52	2629.28	-3.11322	0.495072	-6.28843	3.2069e-10	1.34024e-07	Down
MSTRG_617	4.93716	24.3721	19.6071	-2.31782	0.593922	-3.90257	9.51764e-05	0.00511689	Down
MSTRG_6336	14.4029	75.0556	43.6179	-2.37577	0.667954	-3.55678	0.000375424	0.0147702	Down
MSTRG_6382	79.9015	340.806	387.336	-2.09508	0.363013	-5.77136	7.86324e-09	1.95698e-06	Down
MSTRG_6702	8400.32	641531	351936	-6.2549	1.52671	-4.09698	4.18578e-05	0.00282668	Down
MSTRG_7101	68.6049	309.935	227.136	-2.17647	0.565951	-3.84569	0.000120216	0.00607939	Down
MSTRG_750	0.680851	22.4736	50.8838	-4.92203	1.14133	-4.31255	1.61383e-05	0.00134385	Down
MSTRG_7697	68.9933	565.778	211.456	-3.03731	0.658822	-4.6102	4.02273e-06	0.000441107	Down
MSTRG_7744	242.271	3277.89	1324.1	-3.75786	0.566782	-6.63018	3.35278e-11	1.81132e-08	Down
MSTRG_8177	144.542	2333.42	1166.19	-4.01312	0.760297	-5.27835	1.30349e-07	2.32842e-05	Down
MSTRG_8373	1559.99	80854.7	21525.4	-5.69575	0.788524	-7.2233	5.07398e-13	4.01388e-10	Down
MSTRG_8655	17.5924	77.4317	61.8568	-2.13704	0.628659	-3.39936	0.000675444	0.0229113	Down
MSTRG_8784	2.38763	30.3726	45.9688	-3.70484	1.15335	-3.21223	0.00131709	0.0368818	Down
MSTRG_9072	0	1187.11	1265.32	-12.478	1.36386	-9.14903	5.74484e-20	1.27248e-16	Down
MSTRG_9254	157.037	892.316	473.306	-2.50597	0.476783	-5.25599	1.47232e-07	2.58825e-05	Down
MSTRG_9710	6.00597	46.2736	23.1508	-2.94491	0.775024	-3.79977	0.000144829	0.00705044	Down
MSTRG_9790	57.231	817.46	388.449	-3.83526	0.374024	-10.254	1.13489e-24	6.28445e-21	Down
