# Supplementary material for: Integrated SMRT and Illumina Sequencing Provide New Insights into Crocin Biosynthesis of Gardenia jasminoides
Source: Int J Mol Sci. 2022 Jun 5;23(11):6321. doi: 10.3390/ijms23116321 (PMC9181021; doi:10.3390/ijms23116321)
Supplement: Supplementary file 1 [file ijms-23-06321-s001.zip › Table S8.xlsx]

## Sheet: Table S8
Tissue	JUL	AUG	SEP	NOV	τ score
Gj10A100T40	0.0729044	0	0	0	1
Gj10A111T44	0.0467268	0	0	0	1
Gj10A120T23	0	0.0772553	0	0	1
Gj10A123T17	0	0.13691	0	0	1
Gj10A133T18	0	0	0.196968	0	1
Gj10A134T67	0	0	0.0390839	0	1
Gj10A13T53	0.036894	0	0	0	1
Gj10A147T94	0	0	0	0.303582	1
Gj10A156T33	0	0	0	0.0616348	1
Gj10A159T52	0	0.021676	0	0	1
Gj10A159T53	0	0	0	0.0101134	1
Gj10A160T54	0.0753914	0	0	0	1
Gj10A192T39	0	0.0600987	0	0	1
Gj10A197T67	0	0.0456368	0	0	1
Gj10A198T40	0	0	0.0368994	0	1
Gj10A1T36	0.0265419	0	0	0	1
Gj10A208T109	0	0.0292762	0	0	1
Gj10A213T82	0.043327	0	0	0	1
Gj10A21T22	0	0.0669733	0	0	1
Gj10A21T23	0	0.322537	0	0	1
Gj10A227T74	0	0	0	0.0631245	1
Gj10A227T77	0	0.0384633	0	0	1
Gj10A230T25	0	0	0.0199839	0	1
Gj10A231T120	0.0244519	0	0	0	1
Gj10A232T69	0	0	0	0.264483	1
Gj10A232T72	0.044632	0	0	0	1
Gj10A239T59	0	0.0414627	0	0	1
Gj10A248T127	0	0.419329	0	0	1
Gj10A251T59	0	0	0.0241211	0	1
Gj10A252T49	0.794334	0	0	0	1
Gj10A256T56	0	0.0300623	0	0	1
Gj10A258T62	0	0.0388498	0	0	1
Gj10A259T48	0	0	0.0436991	0	1
Gj10A265T38	0.0453144	0	0	0	1
Gj10A273T113	0	0	0.0157413	0	1
Gj10A274T105	0	0	0	0.022569	1
Gj10A284T91	0.096414	0	0	0	1
Gj10A29T17	0	0.0313046	0	0	1
Gj10A48T34	1.50703	0	0	0	1
Gj10A51T9	0	0	0.0373405	0	1
Gj10A59T49	0	0.235608	0	0	1
Gj10E188T2	0.0201347	0	0	0	1
Gj10E22T0	0	0	0	0.494781	1
Gj10E262T1	0	0	0	0.0702968	1
Gj10E40T0	0	0	0.508205	0	1
Gj10P117T4	0.0200812	0	0	0	1
Gj10P134T11	0	0.0301296	0	0	1
Gj10P13T0	0	0.00823447	0	0	1
Gj10P146T2	0	0	0	0.0172965	1
Gj10P148T5	0	0.210206	0	0	1
Gj10P163T6	0	0.0182108	0	0	1
Gj10P17T1	0	0.0811683	0	0	1
Gj10P190T8	0.0827811	0	0	0	1
Gj10P199T6	0	0	0	0.0739328	1
Gj10P205T10	0.381444	0	0	0	1
Gj10P213T6	0.107651	0	0	0	1
Gj10P213T8	0.0765424	0	0	0	1
Gj10P222T10	0	0	0.08189	0	1
Gj10P229T0	0	0.325585	0	0	1
Gj10P230T3	0	0.435195	0	0	1
Gj10P231T16	0.0443675	0	0	0	1
Gj10P233T1	0	0.0284801	0	0	1
Gj10P247T12	0	0.0407296	0	0	1
Gj10P252T4	0	0	0.0184497	0	1
Gj10P280T27	0.0882013	0	0	0	1
Gj10P285T17	0	0.0308324	0	0	1
Gj10P37T0	0.0837165	0	0	0	1
Gj10P38T0	0	0	0.0578547	0	1
Gj10P42T4	0	0	0	0.109676	1
Gj10P46T2	0.172551	0	0	0	1
Gj10P5T8	0	0.25108	0	0	1
Gj10P61T1	0	0	0	0.133084	1
Gj10P66T8	0	0.0688404	0	0	1
Gj10P75T1	0	0	0	0.0206656	1
Gj10P92T1	0.00701601	0	0	0	1
Gj10P97T0	2.24134	0	0	0	1
Gj10X105T6	0	0	0.0984839	0	1
Gj10X112T8	0	0.461934	0	0	1
Gj10X113T9	0	0	0.0660032	0	1
Gj10X117T37	0.637326	0	0	0	1
Gj10X128T5	0	0	0.130173	0	1
Gj10X130T24	0	0	0	0.0630603	1
Gj10X130T31	0.557059	0	0	0	1
Gj10X136T10	0	0.0430423	0	0	1
Gj10X147T64	0	0	0	0.357342	1
Gj10X150T30	0	0.1067	0	0	1
Gj10X157T19	0.0911551	0	0	0	1
Gj10X159T22	0.094986	0	0	0	1
Gj10X160T12	0.120696	0	0	0	1
Gj10X160T50	0.151925	0	0	0	1
Gj10X160T7	0.0879566	0	0	0	1
Gj10X162T24	0.103197	0	0	0	1
Gj10X165T22	0	0	0	0.348237	1
Gj10X172T3	0.362771	0	0	0	1
Gj10X182T11	0.477479	0	0	0	1
Gj10X184T39	0.235204	0	0	0	1
Gj10X185T65	0	0	0	0.0715555	1
Gj10X186T54	0	0	0	0.134003	1
Gj10X187T71	0	0.0977511	0	0	1
Gj10X190T27	0.16995	0	0	0	1
Gj10X197T10	0	0.164689	0	0	1
Gj10X199T24	0	0.18831	0	0	1
Gj10X201T40	0	0	0.859857	0	1
Gj10X203T12	0	0.37552	0	0	1
Gj10X205T21	0.11418	0	0	0	1
Gj10X20T6	0	0.378622	0	0	1
Gj10X215T19	0	0	0	0.0745757	1
Gj10X216T22	0.384415	0	0	0	1
Gj10X216T9	0	0.0740891	0	0	1
Gj10X219T63	0	0.172175	0	0	1
Gj10X221T88	0	0	0	0.0437561	1
Gj10X226T11	0.0748375	0	0	0	1
Gj10X227T54	0	0	0.0451867	0	1
Gj10X234T21	0.18231	0	0	0	1
Gj10X235T9	0.164642	0	0	0	1
Gj10X236T13	0	0	0	0.0160004	1
Gj10X240T12	0	0	0	0.111379	1
Gj10X240T16	0	0	0	0.0249779	1
Gj10X241T17	0	0.00920455	0	0	1
Gj10X242T30	0	0.125218	0	0	1
Gj10X243T22	0.112664	0	0	0	1
Gj10X246T38	0.068601	0	0	0	1
Gj10X252T39	10.5249	0	0	0	1
Gj10X256T22	0.228749	0	0	0	1
Gj10X256T28	0	0	0	0.0720689	1
Gj10X259T25	0.133131	0	0	0	1
Gj10X260T17	0	0.210436	0	0	1
Gj10X266T53	0	0	0.207338	0	1
Gj10X270T24	0	0.0245965	0	0	1
Gj10X275T29	0.470018	0	0	0	1
Gj10X33T20	0	0.47573	0	0	1
Gj10X66T19	0.859004	0	0	0	1
Gj10X8T6	0.167745	0	0	0	1
Gj10X91T12	0.0705611	0	0	0	1
Gj11A102T49	0	0.0792438	0	0	1
Gj11A111T42	0.8985	0	0	0	1
Gj11A111T43	0.281299	0	0	0	1
Gj11A118T13	0	0.0946555	0	0	1
Gj11A120T5	0	0.122166	0	0	1
Gj11A136T36	0.765791	0	0	0	1
Gj11A136T37	0.040388	0	0	0	1
Gj11A136T38	0.0417276	0	0	0	1
Gj11A152T26	0	0.270561	0	0	1
Gj11A183T19	0	0	0	0.327838	1
Gj11A193T37	0	0	0.0902306	0	1
Gj11A201T27	0	0	0	0.01115	1
Gj11A210T54	0	0.0600987	0	0	1
Gj11A213T22	0.329285	0	0	0	1
Gj11A221T8	0	0.0658757	0	0	1
Gj11A228T49	0	0.0172498	0	0	1
Gj11A233T32	0.215403	0	0	0	1
Gj11A235T44	0	0.20569	0	0	1
Gj11A238T43	0.0816409	0	0	0	1
Gj11A243T34	0	0	0	0.0303582	1
Gj11A253T74	0.862328	0	0	0	1
Gj11A277T44	0.322586	0	0	0	1
Gj11A282T47	0	0	0	0.0355343	1
Gj11A282T48	0	0	0	0.0379381	1
Gj11A285T26	0.0547927	0	0	0	1
Gj11A287T33	0	0	0	0.0476456	1
Gj11A290T119	0.111412	0	0	0	1
Gj11A291T56	0.202567	0	0	0	1
Gj11A292T68	0.20314	0	0	0	1
Gj11A292T72	0	0.0123482	0	0	1
Gj11A297T37	0	0	0	0.330826	1
Gj11A299T50	0.0327104	0	0	0	1
Gj11A299T57	0.0887834	0	0	0	1
Gj11A304T82	0.150962	0	0	0	1
Gj11A30T11	0.220379	0	0	0	1
Gj11A318T100	0.14855	0	0	0	1
Gj11A320T81	0	0.0638402	0	0	1
Gj11A321T63	0.0678472	0	0	0	1
Gj11A322T73	0.970145	0	0	0	1
Gj11A324T79	0	0	0.160346	0	1
Gj11A327T118	0	0	0.167257	0	1
Gj11A327T120	0	0.0391293	0	0	1
Gj11A327T123	0	0	0	0.0484531	1
Gj11A328T56	0.113967	0	0	0	1
Gj11A334T108	0.0319333	0	0	0	1
Gj11A336T94	0.621342	0	0	0	1
Gj11A336T95	0	0	0	0.126993	1
Gj11A337T122	0.0917512	0	0	0	1
Gj11A339T57	0.0976883	0	0	0	1
Gj11A339T59	0.0171518	0	0	0	1
Gj11A343T16	0.0721062	0	0	0	1
Gj11A346T85	0.0103985	0	0	0	1
Gj11A350T97	0	0	0	0.0242266	1
Gj11A353T64	0.0664044	0	0	0	1
Gj11A357T48	0	0.132925	0	0	1
Gj11A359T42	0	0	0.0278942	0	1
Gj11A370T77	1.17714	0	0	0	1
Gj11A372T72	0	0.0423356	0	0	1
Gj11A377T56	0.364663	0	0	0	1
Gj11A378T82	0	0.0116284	0	0	1
Gj11A399T83	0.103236	0	0	0	1
Gj11A408T87	3.3549	0	0	0	1
Gj11A420T119	0	0	0.0129812	0	1
Gj11A427T66	0	0	0.0389936	0	1
Gj11A427T70	0.0117322	0	0	0	1
Gj11A429T48	0.0196884	0	0	0	1
Gj11A431T92	0	0.00880982	0	0	1
Gj11A44T32	0	0	0.0344576	0	1
Gj11A54T60	0	0	0.0853527	0	1
Gj11A71T49	0.0677952	0	0	0	1
Gj11A72T34	0.0225463	0	0	0	1
Gj11A78T5	0.692202	0	0	0	1
Gj11A82T48	0	0.0102019	0	0	1
Gj11A8T21	0	0.0122452	0	0	1
Gj11A95T44	2.78604	0	0	0	1
Gj11E214T0	0	0.0610944	0	0	1
Gj11E255T1	0.91373	0	0	0	1
Gj11E332T0	0	0	0.0852042	0	1
Gj11P102T10	0	0.174154	0	0	1
Gj11P102T8	0	0.393787	0	0	1
Gj11P118T4	0.749783	0	0	0	1
Gj11P128T1	0.021735	0	0	0	1
Gj11P150T1	0	0	0	0.0297151	1
Gj11P163T0	0.0215636	0	0	0	1
Gj11P193T4	0	0	0.0264013	0	1
Gj11P1T0	0.123949	0	0	0	1
Gj11P201T4	0	0	0.135346	0	1
Gj11P215T1	1.04431	0	0	0	1
Gj11P217T2	0	0.00968761	0	0	1
Gj11P232T8	0.0165747	0	0	0	1
Gj11P253T9	0.0195228	0	0	0	1
Gj11P267T14	0	0	0.0203868	0	1
Gj11P274T4	0	0.026378	0	0	1
Gj11P277T3	0.0503167	0	0	0	1
Gj11P279T15	0	0	0	0.0637018	1
Gj11P305T9	0.0686684	0	0	0	1
Gj11P328T3	0.0545776	0	0	0	1
Gj11P339T3	0.089226	0	0	0	1
Gj11P341T6	0	0	0.0253523	0	1
Gj11P354T7	0	0	0	0.0337003	1
Gj11P363T21	0.22366	0	0	0	1
Gj11P365T10	0.0559149	0	0	0	1
Gj11P365T13	0	0	0	0.228699	1
Gj11P368T12	0	0.0126684	0	0	1
Gj11P378T16	0	0	0	0.169871	1
Gj11P382T16	0	0	0	0.0579473	1
Gj11P392T15	0	0.478881	0	0	1
Gj11P406T20	0.0531105	0	0	0	1
Gj11P41T3	0.0865156	0	0	0	1
Gj11P51T2	0	0.0350344	0	0	1
Gj11P54T5	0.309438	0	0	0	1
Gj11P58T0	0	0.0232109	0	0	1
Gj11P65T2	0.206582	0	0	0	1
Gj11P67T7	0	0	0.0964245	0	1
Gj11P72T5	0.0627937	0	0	0	1
Gj11P89T1	0	0	0	0.0175382	1
Gj11P95T2	0.536165	0	0	0	1
Gj11P95T3	0	0	0	0.285886	1
Gj11P96T0	0	0	0	1.89353	1
Gj11X113T1	0.047493	0	0	0	1
Gj11X119T1	0	0.0426362	0	0	1
Gj11X135T7	1.19818	0	0	0	1
Gj11X141T2	0.114595	0	0	0	1
Gj11X165T9	0	0.06277	0	0	1
Gj11X16T6	0.189972	0	0	0	1
Gj11X181T8	0	0.162298	0	0	1
Gj11X192T3	1.23469	0	0	0	1
Gj11X192T5	0	0	0	0.113555	1
Gj11X201T12	0.064276	0	0	0	1
Gj11X207T17	0.448973	0	0	0	1
Gj11X207T20	0.0911551	0	0	0	1
Gj11X216T14	0	0.215126	0	0	1
Gj11X223T5	0	0.338055	0	0	1
Gj11X227T16	0.063062	0	0	0	1
Gj11X229T9	0	0	0.156208	0	1
Gj11X22T48	0	0	0.170408	0	1
Gj11X232T19	1.23577	0	0	0	1
Gj11X232T23	2.20948	0	0	0	1
Gj11X235T31	0	0	0	0.0404538	1
Gj11X235T40	0	0.0378785	0	0	1
Gj11X236T15	0.664758	0	0	0	1
Gj11X237T29	0	0	0	0.0670016	1
Gj11X241T4	0	0.163353	0	0	1
Gj11X24T14	0.048763	0	0	0	1
Gj11X253T23	0.608916	0	0	0	1
Gj11X265T31	0.0589827	0	0	0	1
Gj11X267T25	0	0.155499	0	0	1
Gj11X267T27	0	0.250394	0	0	1
Gj11X273T25	0.0698937	0	0	0	1
Gj11X275T17	4.28056	0	0	0	1
Gj11X276T33	0	0	0	0.0569072	1
Gj11X280T59	0	0	0	0.292519	1
Gj11X282T27	0	0	0	0.0726797	1
Gj11X289T23	0.328911	0	0	0	1
Gj11X291T47	0	0.0184773	0	0	1
Gj11X292T57	0	0.203251	0	0	1
Gj11X293T44	0.258601	0	0	0	1
Gj11X293T49	0.348348	0	0	0	1
Gj11X295T46	1.67684	0	0	0	1
Gj11X296T13	0	0	0.0628704	0	1
Gj11X297T19	0.405968	0	0	0	1
Gj11X301T25	0.0364663	0	0	0	1
Gj11X302T3	8.54272	0	0	0	1
Gj11X305T18	0	0.631309	0	0	1
Gj11X307T30	0	0	0.305624	0	1
Gj11X314T29	0	0	0	0.174118	1
Gj11X319T18	0.100515	0	0	0	1
Gj11X320T34	0	0	0.213178	0	1
Gj11X320T61	0	0	0	0.146507	1
Gj11X320T63	0	0.0742717	0	0	1
Gj11X324T53	0	0	0	0.625735	1
Gj11X325T12	0.0629207	0	0	0	1
Gj11X328T20	0.238739	0	0	0	1
Gj11X329T7	2.19523	0	0	0	1
Gj11X330T17	0	0.709916	0	0	1
Gj11X331T26	0.0338306	0	0	0	1
Gj11X333T53	1.13983	0	0	0	1
Gj11X340T42	0	0	0	0.0357777	1
Gj11X341T27	0.140962	0	0	0	1
Gj11X344T7	0	0	0	0.307268	1
Gj11X350T68	0	0.311685	0	0	1
Gj11X350T69	0.097036	0	0	0	1
Gj11X356T53	0	0.420492	0	0	1
Gj11X357T40	0.0651108	0	0	0	1
Gj11X358T49	0	0	0	0.113814	1
Gj11X369T32	0	0.0147387	0	0	1
Gj11X387T15	0	0.036406	0	0	1
Gj11X389T21	0	0.648326	0	0	1
Gj11X406T57	0.0479541	0	0	0	1
Gj11X418T75	17.9216	0	0	0	1
Gj11X428T45	0.227713	0	0	0	1
Gj11X429T30	0.14691	0	0	0	1
Gj11X429T32	0.083042	0	0	0	1
Gj11X436T39	0.0394766	0	0	0	1
Gj11X43T34	1.09965	0	0	0	1
Gj11X58T23	0	0	0.121196	0	1
Gj11X59T16	0	0	0	0.349624	1
Gj11X66T17	0.322586	0	0	0	1
Gj11X82T11	0.0706131	0	0	0	1
Gj11X93T4	0	0.0807042	0	0	1
Gj11X95T29	0.655002	0	0	0	1
Gj1A100T40	0	0	0	0.0348626	1
Gj1A113T24	0	0	0.0395462	0	1
Gj1A123T13	0.0504008	0	0	0	1
Gj1A126T17	0	0	0	0.0228091	1
Gj1A140T49	0	0	0.0600799	0	1
Gj1A148T10	0	0	0	0.0432413	1
Gj1A149T96	0.185474	0	0	0	1
Gj1A181T38	0.0649904	0	0	0	1
Gj1A182T55	0.025009	0	0	0	1
Gj1A185T31	0	0.0525516	0	0	1
Gj1A18T92	0.226609	0	0	0	1
Gj1A191T22	0.147441	0	0	0	1
Gj1A194T30	0.105091	0	0	0	1
Gj1A199T5	0.0350596	0	0	0	1
Gj1A238T26	0.0283353	0	0	0	1
Gj1A243T13	0.290639	0	0	0	1
Gj1A248T28	0.031531	0	0	0	1
Gj1A262T4	0	0.130616	0	0	1
Gj1A27T45	0.445768	0	0	0	1
Gj1A307T51	0	0	0	0.0233049	1
Gj1A311T37	0	0	0.696268	0	1
Gj1A317T18	0	0	0.0442097	0	1
Gj1A32T102	0.0180371	0	0	0	1
Gj1A338T33	0.0695672	0	0	0	1
Gj1A338T34	0	0	0	0.0484531	1
Gj1A338T35	0	0	0	0.149244	1
Gj1A33T42	0.0105993	0	0	0	1
Gj1A366T9	0.192682	0	0	0	1
Gj1A36T59	0	0.111591	0	0	1
Gj1A386T11	0.0670038	0	0	0	1
Gj1A398T19	0.0639872	0	0	0	1
Gj1A401T65	0.00801073	0	0	0	1
Gj1A40T39	0	0.0173158	0	0	1
Gj1A418T45	0	0	0	0.0322575	1
Gj1A418T47	0	0	0	0.0907352	1
Gj1A422T44	0	0	0	0.0398162	1
Gj1A432T37	0.0667469	0	0	0	1
Gj1A432T38	0.089264	0	0	0	1
Gj1A432T39	0	0	0	0.0400757	1
Gj1A435T15	0	0	0	0.0725493	1
Gj1A449T48	0.0501353	0	0	0	1
Gj1A450T83	0.747828	0	0	0	1
Gj1A450T85	0.0360741	0	0	0	1
Gj1A452T80	0	0.0135765	0	0	1
Gj1A460T124	0.0245241	0	0	0	1
Gj1A462T71	0.109762	0	0	0	1
Gj1A463T46	0.0545776	0	0	0	1
Gj1A464T72	0.220024	0	0	0	1
Gj1A478T100	0.195756	0	0	0	1
Gj1A47T48	0	0.163199	0	0	1
Gj1A480T84	0	0	0.0362346	0	1
Gj1A490T74	0.0297247	0	0	0	1
Gj1A491T64	0.0924153	0	0	0	1
Gj1A495T12	0	0	0.0909525	0	1
Gj1A499T27	0.550817	0	0	0	1
Gj1A503T59	0.0261337	0	0	0	1
Gj1A509T69	0.071757	0	0	0	1
Gj1A523T86	2.10693	0	0	0	1
Gj1A526T43	0.128851	0	0	0	1
Gj1A529T127	0.0120765	0	0	0	1
Gj1A537T82	0.0269906	0	0	0	1
Gj1A540T37	0.0822278	0	0	0	1
Gj1A56T59	0.0260992	0	0	0	1
Gj1A70T72	0.332168	0	0	0	1
Gj1A71T40	0	0.068591	0	0	1
Gj1A74T50	0	0.247157	0	0	1
Gj1A85T47	0	0	0.02253	0	1
Gj1A92T22	0.139789	0	0	0	1
Gj1A94T60	0.294424	0	0	0	1
Gj1E480T3	0.0700606	0	0	0	1
Gj1E98T1	0	0.062956	0	0	1
Gj1P103T5	0	0.0318307	0	0	1
Gj1P107T5	0	0.0714535	0	0	1
Gj1P127T4	0	0.280506	0	0	1
Gj1P12T15	0.306996	0	0	0	1
Gj1P132T2	0	0.0320527	0	0	1
Gj1P137T2	0	0	0	0.0367856	1
Gj1P173T1	0.0786436	0	0	0	1
Gj1P180T8	0	0.0525516	0	0	1
Gj1P233T1	1.63058	0	0	0	1
Gj1P249T5	0.0182331	0	0	0	1
Gj1P249T6	0.0759408	0	0	0	1
Gj1P25T18	0	0.105594	0	0	1
Gj1P266T1	0.0837707	0	0	0	1
Gj1P295T0	0	0	0.0194474	0	1
Gj1P29T9	0	0	0.0609662	0	1
Gj1P325T0	0	0.26778	0	0	1
Gj1P335T2	0.0139331	0	0	0	1
Gj1P356T1	0	0	0	0.104124	1
Gj1P363T3	0	0	0.020646	0	1
Gj1P395T6	0	0	0	0.0290719	1
Gj1P400T0	0.0312612	0	0	0	1
Gj1P404T7	0	0.0244956	0	0	1
Gj1P408T4	0.106168	0	0	0	1
Gj1P434T8	0	0	0.0554583	0	1
Gj1P437T6	0.0695672	0	0	0	1
Gj1P451T6	0	0	0	0.0251132	1
Gj1P456T0	0	0	0	0.0293706	1
Gj1P456T3	0.0415065	0	0	0	1
Gj1P458T4	0	0	0.172476	0	1
Gj1P472T15	0	0	0.0371943	0	1
Gj1P478T9	0.0209771	0	0	0	1
Gj1P47T5	0.983528	0	0	0	1
Gj1P47T6	0.465645	0	0	0	1
Gj1P480T8	0.0158849	0	0	0	1
Gj1P482T4	0.097526	0	0	0	1
Gj1P486T3	0	0.0129721	0	0	1
Gj1P487T12	0.043395	0	0	0	1
Gj1P48T12	0	0.0427772	0	0	1
Gj1P499T3	0	0	0	0.291879	1
Gj1P49T7	0	0	0	0.592145	1
Gj1P505T11	0.0612207	0	0	0	1
Gj1P525T6	0.275511	0	0	0	1
Gj1P532T7	0	0.0319395	0	0	1
Gj1P532T8	0.0574334	0	0	0	1
Gj1P533T7	0	0.0177003	0	0	1
Gj1P70T10	0	0.189627	0	0	1
Gj1P71T2	6.43989	0	0	0	1
Gj1P76T7	0	0.0396442	0	0	1
Gj1P78T3	0.100802	0	0	0	1
Gj1P80T9	0.0603399	0	0	0	1
Gj1P85T13	0.130222	0	0	0	1
Gj1P85T14	0.517985	0	0	0	1
Gj1P89T2	0	0	0.0798763	0	1
Gj1P92T1	0.633644	0	0	0	1
Gj1P92T2	1.80817	0	0	0	1
Gj1P93T5	0	0.0315655	0	0	1
Gj1X109T6	0	0	0	0.0243642	1
Gj1X110T4	0	0	0	0.140594	1
Gj1X115T6	0.265419	0	0	0	1
Gj1X123T15	0	0	0	0.028398	1
Gj1X124T4	0.0371117	0	0	0	1
Gj1X125T15	0.48763	0	0	0	1
Gj1X128T20	1.87079	0	0	0	1
Gj1X135T9	0	0.178399	0	0	1
Gj1X137T20	0.0742234	0	0	0	1
Gj1X138T41	0.485247	0	0	0	1
Gj1X13T51	0	0	0	0.0599735	1
Gj1X147T14	0	0	0	0.0655669	1
Gj1X149T65	0.323453	0	0	0	1
Gj1X175T6	0.0557059	0	0	0	1
Gj1X184T9	8.59127	0	0	0	1
Gj1X189T39	0	0	0	0.816781	1
Gj1X190T24	0	0	0.0787871	0	1
Gj1X192T5	0	0	0.0310347	0	1
Gj1X201T1	0	0	0	0.0300204	1
Gj1X210T6	0	0.210206	0	0	1
Gj1X216T29	0	0	0.0362346	0	1
Gj1X219T4	0.135323	0	0	0	1
Gj1X220T10	0	0	0	0.0803623	1
Gj1X226T1	0	0.0742717	0	0	1
Gj1X230T18	0.260443	0	0	0	1
Gj1X238T7	0.0563318	0	0	0	1
Gj1X249T29	0	0.11837	0	0	1
Gj1X254T28	0	0	0	0.0553409	1
Gj1X254T3	0.119019	0	0	0	1
Gj1X259T2	0	0.107457	0	0	1
Gj1X261T4	0	0	0	0.100536	1
Gj1X262T2	0.048675	0	0	0	1
Gj1X264T5	0	0.151914	0	0	1
Gj1X26T62	0	1.00602	0	0	1
Gj1X275T8	0.0398329	0	0	0	1
Gj1X276T19	0.259962	0	0	0	1
Gj1X300T1	0	0.108224	0	0	1
Gj1X31T23	0.482425	0	0	0	1
Gj1X326T19	0.204567	0	0	0	1
Gj1X329T9	0.213235	0	0	0	1
Gj1X32T54	0	0	0	0.50268	1
Gj1X334T7	0.252248	0	0	0	1
Gj1X348T14	0	0.0255936	0	0	1
Gj1X351T2	0.0547555	0	0	0	1
Gj1X356T9	0	0.120518	0	0	1
Gj1X365T2	0	0.0548964	0	0	1
Gj1X371T0	0	0	0	0.186439	1
Gj1X382T3	0	0	0.0442097	0	1
Gj1X390T12	0.965643	0	0	0	1
Gj1X395T28	0	0.0946964	0	0	1
Gj1X403T1	0	0	0	0.276652	1
Gj1X404T8	0	0.11837	0	0	1
Gj1X410T20	0	0.12554	0	0	1
Gj1X421T34	0	0.892407	0	0	1
Gj1X425T15	0	0	0	0.0842508	1
Gj1X426T29	0	0.115434	0	0	1
Gj1X426T32	0.378922	0	0	0	1
Gj1X426T36	0	0.37662	0	0	1
Gj1X436T28	0	0	0.0176592	0	1
Gj1X437T10	0.210558	0	0	0	1
Gj1X438T25	0.017732	0	0	0	1
Gj1X438T45	0.107818	0	0	0	1
Gj1X444T3	0	0	0.110738	0	1
Gj1X451T59	0	0.0695298	0	0	1
Gj1X454T26	0	0.0293632	0	0	1
Gj1X457T16	1.59571	0	0	0	1
Gj1X457T49	0.116218	0	0	0	1
Gj1X458T23	0	0	0	0.234964	1
Gj1X468T12	0.585459	0	0	0	1
Gj1X469T24	0.0388646	0	0	0	1
Gj1X469T3	0	0	0.0686261	0	1
Gj1X469T39	0	0	0.0492419	0	1
Gj1X471T24	0.068601	0	0	0	1
Gj1X471T28	0.773033	0	0	0	1
Gj1X472T17	0	0.0565351	0	0	1
Gj1X478T45	0	0	0.133492	0	1
Gj1X480T11	0.156357	0	0	0	1
Gj1X483T59	0.3828	0	0	0	1
Gj1X483T62	0.167745	0	0	0	1
Gj1X486T28	0	0.223596	0	0	1
Gj1X492T29	0.0759626	0	0	0	1
Gj1X494T14	0.235204	0	0	0	1
Gj1X49T24	0	0	0	0.118717	1
Gj1X51T30	0	0.124547	0	0	1
Gj1X521T43	0.0411606	0	0	0	1
Gj1X525T12	0	0.145687	0	0	1
Gj1X525T13	0	0.631309	0	0	1
Gj1X528T18	0	0.0517516	0	0	1
Gj1X531T31	0	0	0.0452776	0	1
Gj1X534T26	0.107962	0	0	0	1
Gj1X534T5	0	0.0169859	0	0	1
Gj1X535T45	0.131131	0	0	0	1
Gj1X535T57	0	0.109341	0	0	1
Gj1X536T12	0	0	0	0.0315302	1
Gj1X537T74	0.0759888	0	0	0	1
Gj1X70T45	0	0.0538028	0	0	1
Gj1X71T29	0	0.156455	0	0	1
Gj1X75T39	0.0495165	0	0	0	1
Gj1X85T42	0.343532	0	0	0	1
Gj1X92T18	0.191816	0	0	0	1
Gj1X97T14	0.0551874	0	0	0	1
Gj1X98T18	0.0635397	0	0	0	1
Gj1X99T12	0.519924	0	0	0	1
Gj2A101T31	0	0	0	0.0498617	1
Gj2A110T21	0.731328	0	0	0	1
Gj2A112T28	0.735637	0	0	0	1
Gj2A11T51	0	0.0190344	0	0	1
Gj2A127T16	0.0850667	0	0	0	1
Gj2A153T18	0	0.31385	0	0	1
Gj2A158T4	0	0	0.0259865	0	1
Gj2A159T21	0.0369482	0	0	0	1
Gj2A160T18	0	0	0	0.0454115	1
Gj2A187T19	0.0990619	0	0	0	1
Gj2A188T35	0.541791	0	0	0	1
Gj2A202T20	0	0	0	0.0257318	1
Gj2A20T58	0	0	0	0.0368504	1
Gj2A241T40	0.0269545	0	0	0	1
Gj2A249T28	0.0796657	0	0	0	1
Gj2A249T29	0.0725061	0	0	0	1
Gj2A259T11	0.0151943	0	0	0	1
Gj2A260T12	0	0	0.0743846	0	1
Gj2A270T35	0.544849	0	0	0	1
Gj2A284T27	0.0495165	0	0	0	1
Gj2A295T30	0.0153394	0	0	0	1
Gj2A302T5	0	0.0648326	0	0	1
Gj2A307T40	0	0	0	0.0246797	1
Gj2A318T95	0	0.0216109	0	0	1
Gj2A31T53	0	0.0711722	0	0	1
Gj2A326T24	0.0476211	0	0	0	1
Gj2A330T15	0	0.0670417	0	0	1
Gj2A343T70	0	0.048559	0	0	1
Gj2A358T82	0.0328482	0	0	0	1
Gj2A359T69	0.00986915	0	0	0	1
Gj2A361T40	0	0.0299543	0	0	1
Gj2A362T74	0	0.140291	0	0	1
Gj2A369T109	0	0	0	0.0481433	1
Gj2A36T81	0.0989512	0	0	0	1
Gj2A381T124	0	0.129657	0	0	1
Gj2A386T119	0.44971	0	0	0	1
Gj2A397T158	0.202346	0	0	0	1
Gj2A401T78	0	0.0379785	0	0	1
Gj2A403T58	0	0	0.0755419	0	1
Gj2A410T33	0	0	0.120308	0	1
Gj2A413T60	0	0	0	0.0131245	1
Gj2A425T40	0	0.00876818	0	0	1
Gj2A426T32	1.23822	0	0	0	1
Gj2A426T34	1.77715	0	0	0	1
Gj2A427T28	0.156183	0	0	0	1
Gj2A428T70	0.0833721	0	0	0	1
Gj2A429T88	0.0807825	0	0	0	1
Gj2A429T91	0.056643	0	0	0	1
Gj2A434T121	0	0	0.0230849	0	1
Gj2A437T21	0.191445	0	0	0	1
Gj2A438T26	1.8346	0	0	0	1
Gj2A445T8	0	0	0	0.0924485	1
Gj2A470T38	0.285693	0	0	0	1
Gj2A475T61	0	0	0.0693522	0	1
Gj2A487T51	0	0.0237232	0	0	1
Gj2A490T17	0	0.0757447	0	0	1
Gj2A492T40	0	0	0	0.0684272	1
Gj2A501T105	0	0	0	0.032344	1
Gj2A55T37	0	0	0	0.440758	1
Gj2A59T95	0	0.0053275	0	0	1
Gj2A83T47	0	0.0525516	0	0	1
Gj2A8T22	0.0233628	0	0	0	1
Gj2A94T22	0.105407	0	0	0	1
Gj2A99T39	0	0	0	0.0599735	1
Gj2E125T0	0	0.0950128	0	0	1
Gj2E150T1	0	0.0274629	0	0	1
Gj2E311T2	1.21295	0	0	0	1
Gj2E412T0	0	0.0648326	0	0	1
Gj2E456T3	0	0	0	0.107717	1
Gj2E54T0	0.0877002	0	0	0	1
Gj2P0T15	0	0	0	0.219477	1
Gj2P11T9	0.0288846	0	0	0	1
Gj2P139T1	0	0	0	0.0900612	1
Gj2P141T1	0.722077	0	0	0	1
Gj2P14T7	0	0	0	0.0745757	1
Gj2P153T2	0	0	0.0463983	0	1
Gj2P160T2	0	0.180858	0	0	1
Gj2P167T6	0	0	0.0672063	0	1
Gj2P167T7	0.0403206	0	0	0	1
Gj2P171T8	0	0	0.0919027	0	1
Gj2P198T4	0.216495	0	0	0	1
Gj2P206T6	0.0177785	0	0	0	1
Gj2P21T9	0.0712819	0	0	0	1
Gj2P222T8	0	0	0.0326567	0	1
Gj2P24T1	0	0	0	0.0474973	1
Gj2P27T6	0	0.0146249	0	0	1
Gj2P281T5	0	0	0	0.0662875	1
Gj2P28T2	0	0	0	0.0487776	1
Gj2P292T2	0	0	0	0.00792662	1
Gj2P296T4	0.178959	0	0	0	1
Gj2P29T7	0	0.0749635	0	0	1
Gj2P30T2	0.268023	0	0	0	1
Gj2P317T6	0.0699562	0	0	0	1
Gj2P328T1	0	0	0.0489694	0	1
Gj2P332T3	2.40335	0	0	0	1
Gj2P350T12	0.114275	0	0	0	1
Gj2P352T13	0	0	0	0.027065	1
Gj2P354T12	0	0	0	0.0609309	1
Gj2P356T11	0	0.0272255	0	0	1
Gj2P360T9	0.0296356	0	0	0	1
Gj2P369T12	0.601775	0	0	0	1
Gj2P36T14	1.1246	0	0	0	1
Gj2P36T15	0.558364	0	0	0	1
Gj2P36T17	0	0	0.0283156	0	1
Gj2P36T9	0	0.0538028	0	0	1
Gj2P382T15	0.0190267	0	0	0	1
Gj2P386T16	0	0.0203102	0	0	1
Gj2P386T17	0.109399	0	0	0	1
Gj2P390T22	0	0	0.238559	0	1
Gj2P403T9	0.337424	0	0	0	1
Gj2P40T1	0	0	0.242581	0	1
Gj2P410T1	0	0.0443082	0	0	1
Gj2P413T6	0.525455	0	0	0	1
Gj2P424T11	0.185964	0	0	0	1
Gj2P425T2	0.0195507	0	0	0	1
Gj2P426T6	0.111412	0	0	0	1
Gj2P428T6	0	0	0	0.0243642	1
Gj2P429T7	0.122737	0	0	0	1
Gj2P43T12	0.0509203	0	0	0	1
Gj2P459T4	0.179493	0	0	0	1
Gj2P45T2	0.152816	0	0	0	1
Gj2P462T6	0.293758	0	0	0	1
Gj2P46T15	0.0361519	0	0	0	1
Gj2P473T4	0.0754088	0	0	0	1
Gj2P481T8	0	0.175292	0	0	1
Gj2P484T7	0	0	0	0.0271399	1
Gj2P487T4	0.786889	0	0	0	1
Gj2P492T3	0.188762	0	0	0	1
Gj2P492T5	0.0704298	0	0	0	1
Gj2P494T2	0.179341	0	0	0	1
Gj2P49T3	0	0	0.0437965	0	1
Gj2P55T8	0.0885976	0	0	0	1
Gj2P59T12	0	0	0	0.0271399	1
Gj2P64T12	1.23086	0	0	0	1
Gj2P64T3	0.0681889	0	0	0	1
Gj2P73T10	0	0	0.0710394	0	1
Gj2P73T4	0.437024	0	0	0	1
Gj2P78T15	0	0	0	0.0360245	1
Gj2P93T0	0.272001	0	0	0	1
Gj2P93T1	1.60885	0	0	0	1
Gj2X11T18	0.586844	0	0	0	1
Gj2X124T18	0	0	0	0.714684	1
Gj2X127T15	0	1.23052	0	0	1
Gj2X132T5	0	0	0.0493287	0	1
Gj2X132T6	0	0.0386516	0	0	1
Gj2X134T5	0.125183	0	0	0	1
Gj2X135T6	0.104449	0	0	0	1
Gj2X138T0	0	0.109793	0	0	1
Gj2X139T10	0.316277	0	0	0	1
Gj2X143T10	0	0.0534845	0	0	1
Gj2X143T18	0	0.0631309	0	0	1
Gj2X149T4	0.14532	0	0	0	1
Gj2X149T5	0.0468554	0	0	0	1
Gj2X162T3	0	0	0.360082	0	1
Gj2X168T31	0	0	0	0.0370071	1
Gj2X180T10	0.823212	0	0	0	1
Gj2X180T32	0.0417794	0	0	0	1
Gj2X189T5	0.192828	0	0	0	1
Gj2X202T18	0	0	0	0.128003	1
Gj2X207T21	0	0	0.323188	0	1
Gj2X20T35	0.162859	0	0	0	1
Gj2X223T9	0.534776	0	0	0	1
Gj2X249T15	0.652354	0	0	0	1
Gj2X266T2	0	0.105173	0	0	1
Gj2X281T6	0	0	0	0.591345	1
Gj2X285T18	0	0	0	0.178671	1
Gj2X293T13	0	0.0852724	0	0	1
Gj2X294T8	0.683663	0	0	0	1
Gj2X297T9	0	0	0.256058	0	1
Gj2X308T35	0	0	0.0387967	0	1
Gj2X311T33	0.18231	0	0	0	1
Gj2X318T90	0	0	0.161594	0	1
Gj2X319T29	0.0981313	0	0	0	1
Gj2X322T1	0	0.347649	0	0	1
Gj2X330T6	0	0	0.768174	0	1
Gj2X345T45	0.141122	0	0	0	1
Gj2X350T83	0.187975	0	0	0	1
Gj2X353T11	0.247899	0	0	0	1
Gj2X353T13	0.526951	0	0	0	1
Gj2X359T48	0	0	0	2.01072	1
Gj2X35T80	0	0	0.0446308	0	1
Gj2X361T32	8.57526	0	0	0	1
Gj2X362T41	0	0.290465	0	0	1
Gj2X364T57	0.0376957	0	0	0	1
Gj2X380T61	0	0	0.115709	0	1
Gj2X391T28	4.75823	0	0	0	1
Gj2X395T53	0	0.461442	0	0	1
Gj2X399T82	0	0	0.173564	0	1
Gj2X39T30	0	0	0.078588	0	1
Gj2X400T14	0	0	0.106505	0	1
Gj2X404T11	0	0.0572513	0	0	1
Gj2X404T15	0	0.0397712	0	0	1
Gj2X406T9	0	0	0.176839	0	1
Gj2X412T13	0	0.0227107	0	0	1
Gj2X414T35	1.18543	0	0	0	1
Gj2X419T30	0.0731744	0	0	0	1
Gj2X41T17	0.29935	0	0	0	1
Gj2X420T63	0.807665	0	0	0	1
Gj2X421T15	0	0.0651832	0	0	1
Gj2X428T19	0	0	0	0.696473	1
Gj2X428T7	0	0	0	0.621851	1
Gj2X42T43	0.0539089	0	0	0	1
Gj2X435T72	0	0	0	0.403952	1
Gj2X447T13	0.0429502	0	0	0	1
Gj2X447T21	0	0	0.193247	0	1
Gj2X469T12	0	0	0.115709	0	1
Gj2X470T34	0	0	0	0.27226	1
Gj2X477T126	0	0	0	0.887194	1
Gj2X478T9	0.0107713	0	0	0	1
Gj2X479T36	0	0.174824	0	0	1
Gj2X480T60	0	0.0688701	0	0	1
Gj2X481T25	0	0	2.28477	0	1
Gj2X487T7	1.52495	0	0	0	1
Gj2X491T22	0	0	0	0.978188	1
Gj2X492T20	0	0	0.187402	0	1
Gj2X492T29	0	0	0.174016	0	1
Gj2X493T11	6.96174	0	0	0	1
Gj2X495T8	0.716218	0	0	0	1
Gj2X498T30	0.114867	0	0	0	1
Gj2X499T75	0.118968	0	0	0	1
Gj2X500T25	0	0.055844	0	0	1
Gj2X55T29	0	0	0	0.0458206	1
Gj2X58T21	0	0.0378196	0	0	1
Gj2X62T31	0	0	0	0.0615526	1
Gj2X82T3	0.322586	0	0	0	1
Gj2X93T3	0.058652	0	0	0	1
Gj2X9T12	0	0	0.152264	0	1
Gj3A108T57	0	0	0.040945	0	1
Gj3A10T71	25.0209	0	0	0	1
Gj3A117T15	0	0.107357	0	0	1
Gj3A11T73	0	0.0430438	0	0	1
Gj3A139T38	0	0	0.0215955	0	1
Gj3A148T35	0.0357918	0	0	0	1
Gj3A167T13	0	0	0.0982371	0	1
Gj3A167T14	0	0	0.0506218	0	1
Gj3A174T54	0	0	0	0.047122	1
Gj3A176T32	0.0433225	0	0	0	1
Gj3A178T59	0	0	0	0.0366504	1
Gj3A180T50	0	0	0	0.0461086	1
Gj3A183T30	0	0	0	0.063293	1
Gj3A189T28	0.0243815	0	0	0	1
Gj3A19T27	0.01721	0	0	0	1
Gj3A201T19	0.0202158	0	0	0	1
Gj3A214T20	0.272927	0	0	0	1
Gj3A215T24	0.0368642	0	0	0	1
Gj3A21T69	0.666808	0	0	0	1
Gj3A22T42	0.0607771	0	0	0	1
Gj3A23T34	0.262667	0	0	0	1
Gj3A254T31	0.0155813	0	0	0	1
Gj3A265T23	0	0.347649	0	0	1
Gj3A27T42	16.481	0	0	0	1
Gj3A284T86	0	0	0	0.0363383	1
Gj3A286T73	0.0715837	0	0	0	1
Gj3A287T79	0	0	0	0.145359	1
Gj3A292T70	0	0.0697151	0	0	1
Gj3A292T72	0	0.056325	0	0	1
Gj3A299T58	0.805354	0	0	0	1
Gj3A2T88	0	0	0	0.0207656	1
Gj3A300T32	0.528322	0	0	0	1
Gj3A301T34	0	0	0	0.0945905	1
Gj3A302T75	0	0	0.13841	0	1
Gj3A314T79	0	0	0	0.0652944	1
Gj3A31T23	0	0	0.0261801	0	1
Gj3A31T25	0.0455775	0	0	0	1
Gj3A321T74	0.203251	0	0	0	1
Gj3A321T75	0	0.0731893	0	0	1
Gj3A323T66	0.0405181	0	0	0	1
Gj3A323T67	0	0.0864807	0	0	1
Gj3A323T71	0	0	0	0.0567777	1
Gj3A32T12	0	0	0.183866	0	1
Gj3A331T83	0	0.0191306	0	0	1
Gj3A333T60	0	0.0196925	0	0	1
Gj3A340T78	0.131847	0	0	0	1
Gj3A42T51	0	0	0	0.0160904	1
Gj3A42T53	0	0	0	0.00816781	1
Gj3A51T30	0	0.0318307	0	0	1
Gj3A53T75	0	0.119217	0	0	1
Gj3A58T69	0	0.030955	0	0	1
Gj3A60T75	0.0250051	0	0	0	1
Gj3A61T55	0.0522674	0	0	0	1
Gj3A63T44	0	0	0.0882345	0	1
Gj3A7T40	0.18043	0	0	0	1
Gj3A81T64	0.218052	0	0	0	1
Gj3A98T74	0.029326	0	0	0	1
Gj3E144T0	0	0	0	0.0842508	1
Gj3E24T1	0	0.182547	0	0	1
Gj3E308T8	0.451057	0	0	0	1
Gj3P107T7	0	0	0.0344576	0	1
Gj3P107T9	0	0	0	0.0404926	1
Gj3P109T4	0	0	0	0.0144868	1
Gj3P109T6	0.048092	0	0	0	1
Gj3P113T1	0	0.0084362	0	0	1
Gj3P133T1	0	0.211908	0	0	1
Gj3P140T6	0	0	0	0.46101	1
Gj3P146T1	0	0	0	0.0139667	1
Gj3P188T2	0.145273	0	0	0	1
Gj3P201T0	0.0295325	0	0	0	1
Gj3P201T3	0.0621292	0	0	0	1
Gj3P201T4	0.0378488	0	0	0	1
Gj3P203T3	0	0.0952254	0	0	1
Gj3P210T6	0	0	0	0.0454685	1
Gj3P21T10	0.468666	0	0	0	1
Gj3P22T6	0.0367861	0	0	0	1
Gj3P262T8	0	0.0982486	0	0	1
Gj3P284T8	0	0.0688701	0	0	1
Gj3P285T7	0	0	0.01171	0	1
Gj3P287T11	0	0.0341864	0	0	1
Gj3P28T1	0	0.0206671	0	0	1
Gj3P2T20	0.0808634	0	0	0	1
Gj3P300T8	0	0	0	0.404908	1
Gj3P300T9	0	0	0	0.229532	1
Gj3P314T13	0	0.0805579	0	0	1
Gj3P317T25	0.0612843	0	0	0	1
Gj3P329T8	0.200895	0	0	0	1
Gj3P336T10	0	0.245048	0	0	1
Gj3P33T11	0	0.217599	0	0	1
Gj3P341T9	0.308076	0	0	0	1
Gj3P343T17	0.945246	0	0	0	1
Gj3P348T21	0.0180759	0	0	0	1
Gj3P37T3	0	0.0307323	0	0	1
Gj3P39T5	0.142544	0	0	0	1
Gj3P42T5	0.0168757	0	0	0	1
Gj3P47T7	0.0682113	0	0	0	1
Gj3P49T2	0.0187773	0	0	0	1
Gj3P4T9	0	0	0	0.032344	1
Gj3P53T5	0	0.0617585	0	0	1
Gj3P61T4	5.47463	0	0	0	1
Gj3P63T5	0.0206808	0	0	0	1
Gj3P67T1	0.105091	0	0	0	1
Gj3P68T0	0	0	0.428348	0	1
Gj3P6T6	0	0	0	0.172347	1
Gj3P74T2	0	0	0.0487245	0	1
Gj3P81T0	0	0.01216	0	0	1
Gj3P81T1	0	0.2086	0	0	1
Gj3P89T1	0	0.0922223	0	0	1
Gj3P8T8	0	0	0.0879589	0	1
Gj3P90T0	0.0107609	0	0	0	1
Gj3P91T0	0.0172096	0	0	0	1
Gj3P91T2	0	0.0447469	0	0	1
Gj3P98T6	0.0566647	0	0	0	1
Gj3P9T8	0	0.011648	0	0	1
Gj3X129T23	0	0	0.0252689	0	1
Gj3X12T19	0	0	0	0.204195	1
Gj3X12T20	0	0.126207	0	0	1
Gj3X139T27	0.102317	0	0	0	1
Gj3X143T2	1.93093	0	0	0	1
Gj3X147T20	0	0	0	0.133937	1
Gj3X148T15	0.274404	0	0	0	1
Gj3X157T27	0.049924	0	0	0	1
Gj3X162T12	0.0959082	0	0	0	1
Gj3X162T13	0.205803	0	0	0	1
Gj3X164T0	0	0	0.468623	0	1
Gj3X178T51	0	0	0	0.0483662	1
Gj3X192T9	0.0517201	0	0	0	1
Gj3X195T1	0	0.0797443	0	0	1
Gj3X198T24	0.206244	0	0	0	1
Gj3X208T5	0	0	0	0.0372878	1
Gj3X212T17	0	0.180374	0	0	1
Gj3X213T44	0	0.03905	0	0	1
Gj3X214T20	0.996765	0	0	0	1
Gj3X219T0	0.139265	0	0	0	1
Gj3X229T14	0	0	0.0600799	0	1
Gj3X232T6	0	0.0272255	0	0	1
Gj3X234T19	0	0	0	0.191497	1
Gj3X247T11	0	0.0594663	0	0	1
Gj3X248T13	0.084432	0	0	0	1
Gj3X24T22	0.0232979	0	0	0	1
Gj3X251T5	0.0574468	0	0	0	1
Gj3X260T12	0	0	0	0.0533015	1
Gj3X262T40	0	0	0	0.301608	1
Gj3X262T41	0	0	0	0.158289	1
Gj3X267T5	0	0.177233	0	0	1
Gj3X275T53	0	0	0.0946713	0	1
Gj3X279T15	0.0987149	0	0	0	1
Gj3X279T22	0.749655	0	0	0	1
Gj3X284T67	0.22199	0	0	0	1
Gj3X286T33	0.00763094	0	0	0	1
Gj3X286T55	0	0	0	0.0332411	1
Gj3X293T28	0	0.0254218	0	0	1
Gj3X294T16	0	0.0354005	0	0	1
Gj3X297T47	0.60886	0	0	0	1
Gj3X298T14	0	0	0.0910739	0	1
Gj3X299T13	0.238739	0	0	0	1
Gj3X29T76	0	0	0	0.241583	1
Gj3X307T107	0	0.0305472	0	0	1
Gj3X309T21	0.0731744	0	0	0	1
Gj3X30T57	0.238571	0	0	0	1
Gj3X340T27	0	0	0.320556	0	1
Gj3X340T42	0.308705	0	0	0	1
Gj3X347T46	0	0	0	0.0561672	1
Gj3X37T14	0	0	0.0840078	0	1
Gj3X52T26	0.129981	0	0	0	1
Gj3X53T28	0	0.21853	0	0	1
Gj3X53T36	0.169439	0	0	0	1
Gj3X58T13	0	0.541122	0	0	1
Gj3X75T3	0.0544626	0	0	0	1
Gj3X90T4	0.0629924	0	0	0	1
Gj4A109T19	0	0.0545015	0	0	1
Gj4A118T104	6.04062	0	0	0	1
Gj4A118T107	0.293803	0	0	0	1
Gj4A118T122	0.0411737	0	0	0	1
Gj4A12T109	0	0	0.0353997	0	1
Gj4A136T73	0.0381411	0	0	0	1
Gj4A155T48	0	0	0.0210929	0	1
Gj4A156T85	2.97023	0	0	0	1
Gj4A158T29	0	0	0	0.0363398	1
Gj4A167T30	0.563974	0	0	0	1
Gj4A194T22	0.135323	0	0	0	1
Gj4A197T16	0	0.0171842	0	0	1
Gj4A198T10	2.32287	0	0	0	1
Gj4A217T101	0.0222824	0	0	0	1
Gj4A21T34	0	0	0.0317424	0	1
Gj4A221T20	0	0	0	0.161055	1
Gj4A223T14	0.0815628	0	0	0	1
Gj4A253T20	0	0.165851	0	0	1
Gj4A259T18	0	0.22046	0	0	1
Gj4A280T20	0	0	0	0.00930174	1
Gj4A290T7	0.0735723	0	0	0	1
Gj4A292T65	0	0.146591	0	0	1
Gj4A306T3	0	0	0	0.0476456	1
Gj4A309T40	0.0849159	0	0	0	1
Gj4A30T75	0	0.873806	0	0	1
Gj4A318T58	0.307559	0	0	0	1
Gj4A319T54	0.231429	0	0	0	1
Gj4A325T4	0	0	0.0477127	0	1
Gj4A343T38	0	0	0	0.0492885	1
Gj4A347T55	0	0	0.0376556	0	1
Gj4A351T38	0	0	0	0.0536013	1
Gj4A35T82	0.108725	0	0	0	1
Gj4A361T28	0	0.0628245	0	0	1
Gj4A382T24	0.0371374	0	0	0	1
Gj4A385T4	0	0	0	0.135058	1
Gj4A388T40	0	0	0	0.0516161	1
Gj4A389T27	0	0	0	0.0416219	1
Gj4A38T36	0	0	0	0.0154087	1
Gj4A393T26	0.310091	0	0	0	1
Gj4A395T5	0	0.0335208	0	0	1
Gj4A404T48	0.123791	0	0	0	1
Gj4A406T37	0	0.023527	0	0	1
Gj4A406T38	0.0377904	0	0	0	1
Gj4A407T34	0	0	0	0.0492421	1
Gj4A407T35	0.198658	0	0	0	1
Gj4A409T74	0.48146	0	0	0	1
Gj4A421T133	0.153612	0	0	0	1
Gj4A424T53	0.0658231	0	0	0	1
Gj4A425T24	0	0	0	0.153634	1
Gj4A42T80	0	0	0.015179	0	1
Gj4A42T83	0	0.0158295	0	0	1
Gj4A434T35	0	0.128933	0	0	1
Gj4A444T15	0.0945949	0	0	0	1
Gj4A44T84	0.0745551	0	0	0	1
Gj4A44T88	0.580124	0	0	0	1
Gj4A468T63	0	0.0269014	0	0	1
Gj4A46T52	0	0	0.0128457	0	1
Gj4A46T53	0	0	0.0128457	0	1
Gj4A470T43	0	0.107606	0	0	1
Gj4A474T39	0.597055	0	0	0	1
Gj4A481T64	0.296052	0	0	0	1
Gj4A484T55	0	0	0.0314352	0	1
Gj4A491T48	0	0	0	0.0266342	1
Gj4A492T86	0	0.0991843	0	0	1
Gj4A494T72	2.05436	0	0	0	1
Gj4A499T84	0.0397082	0	0	0	1
Gj4A500T110	0	0	0	0.0128003	1
Gj4A507T93	0	0.0655906	0	0	1
Gj4A509T103	0.271044	0	0	0	1
Gj4A509T105	0	0.0291373	0	0	1
Gj4A62T20	0.0744584	0	0	0	1
Gj4A74T26	0.0252004	0	0	0	1
Gj4A87T89	0.0593306	0	0	0	1
Gj4A88T61	0.816122	0	0	0	1
Gj4A9T76	1.65401	0	0	0	1
Gj4E16T0	0.074443	0	0	0	1
Gj4E405T2	0.119424	0	0	0	1
Gj4E53T0	0	0.0192603	0	0	1
Gj4E87T1	0	0	0.0378411	0	1
Gj4P117T12	1.10845	0	0	0	1
Gj4P118T5	0	0	0	0.0172213	1
Gj4P120T14	0	0.0459493	0	0	1
Gj4P125T19	0.0798785	0	0	0	1
Gj4P125T20	0.469075	0	0	0	1
Gj4P130T10	0.91468	0	0	0	1
Gj4P131T4	0	0.114901	0	0	1
Gj4P131T5	0	0.314167	0	0	1
Gj4P138T12	0	0.153562	0	0	1
Gj4P139T2	0.0204217	0	0	0	1
Gj4P15T18	1.07806	0	0	0	1
Gj4P15T9	2.93808	0	0	0	1
Gj4P178T1	0.988809	0	0	0	1
Gj4P17T10	0.875773	0	0	0	1
Gj4P17T9	0.14662	0	0	0	1
Gj4P181T5	0	0	0	0.0615517	1
Gj4P18T10	0	0.0679662	0	0	1
Gj4P19T14	0.432702	0	0	0	1
Gj4P20T17	0.157366	0	0	0	1
Gj4P21T5	2.24174	0	0	0	1
Gj4P23T7	0	0	0.0308917	0	1
Gj4P242T2	0	0	0.0767316	0	1
Gj4P256T2	0.100271	0	0	0	1
Gj4P276T2	0	0	0	0.0127622	1
Gj4P278T5	0.117276	0	0	0	1
Gj4P342T1	0	0	0	0.0214961	1
Gj4P34T9	0	0	0	0.0170841	1
Gj4P356T3	0.109858	0	0	0	1
Gj4P35T8	0	0	0	0.0253734	1
Gj4P382T3	0.107376	0	0	0	1
Gj4P398T1	0.13789	0	0	0	1
Gj4P39T6	4.81723	0	0	0	1
Gj4P401T10	0.206577	0	0	0	1
Gj4P402T7	0.0396326	0	0	0	1
Gj4P406T6	0	0	0	0.0220468	1
Gj4P408T8	0.0504008	0	0	0	1
Gj4P408T9	0.250365	0	0	0	1
Gj4P427T4	0.153156	0	0	0	1
Gj4P42T19	0	0.0394568	0	0	1
Gj4P432T1	0.0953095	0	0	0	1
Gj4P432T4	0.381238	0	0	0	1
Gj4P434T9	0	0	0.0901198	0	1
Gj4P435T5	0	0	0.0378411	0	1
Gj4P436T8	0	0.0846448	0	0	1
Gj4P437T3	0.474135	0	0	0	1
Gj4P441T5	0.147441	0	0	0	1
Gj4P447T14	0.0737205	0	0	0	1
Gj4P454T0	0	0.054781	0	0	1
Gj4P467T9	0.0520837	0	0	0	1
Gj4P470T3	0	0	0.0408603	0	1
Gj4P471T7	0.0787534	0	0	0	1
Gj4P475T3	0	0	0.0976298	0	1
Gj4P47T10	0.155739	0	0	0	1
Gj4P489T9	0.198659	0	0	0	1
Gj4P48T2	0.0190628	0	0	0	1
Gj4P490T8	0.0210735	0	0	0	1
Gj4P490T9	0.105921	0	0	0	1
Gj4P491T16	0.426683	0	0	0	1
Gj4P499T20	0.918549	0	0	0	1
Gj4P499T21	1.55069	0	0	0	1
Gj4P51T7	0.381843	0	0	0	1
Gj4P52T3	0	0.212679	0	0	1
Gj4P53T14	0	0.0548964	0	0	1
Gj4P54T1	0.0561281	0	0	0	1
Gj4P58T6	0	0	0.0640145	0	1
Gj4P61T7	0	0.0578298	0	0	1
Gj4P62T11	0.293689	0	0	0	1
Gj4P62T8	0.378725	0	0	0	1
Gj4P65T7	0	0	0.0414711	0	1
Gj4P70T9	0	0	0	0.0580015	1
Gj4P73T6	0.0530622	0	0	0	1
Gj4P73T7	0.0156185	0	0	0	1
Gj4P78T4	0.0251115	0	0	0	1
Gj4P81T3	2.9824	0	0	0	1
Gj4P90T7	0	0	0	0.122907	1
Gj4P95T8	0	0.0425602	0	0	1
Gj4P95T9	0	0.138093	0	0	1
Gj4X102T35	0.439047	0	0	0	1
Gj4X102T37	0	0.460397	0	0	1
Gj4X102T43	0	0.357191	0	0	1
Gj4X105T4	0	0.0473482	0	0	1
Gj4X108T5	0	0	0.0760569	0	1
Gj4X109T14	0	0	0	0.0621464	1
Gj4X115T49	0.102317	0	0	0	1
Gj4X118T55	0.0875495	0	0	0	1
Gj4X120T18	0	0	0	0.0179418	1
Gj4X120T57	0	0	0	0.437115	1
Gj4X121T12	0	0	0.0540968	0	1
Gj4X121T16	0	0	0.0749608	0	1
Gj4X122T39	0	0	0	0.391362	1
Gj4X127T18	0	0	0.0391926	0	1
Gj4X127T21	0	0	0.0902306	0	1
Gj4X128T22	0.0901854	0	0	0	1
Gj4X131T18	0	0.0711696	0	0	1
Gj4X134T26	0	0	0.590601	0	1
Gj4X136T11	0	0	0.0601538	0	1
Gj4X137T25	0.0134411	0	0	0	1
Gj4X137T93	0	0	0	0.312659	1
Gj4X161T28	0.553005	0	0	0	1
Gj4X162T8	0.36803	0	0	0	1
Gj4X189T1	0	0	0	0.189739	1
Gj4X191T4	0	0	0.0526147	0	1
Gj4X195T2	0	0	0.347128	0	1
Gj4X195T8	0	0.0257677	0	0	1
Gj4X214T6	0	0	0	0.13613	1
Gj4X235T3	0	0	0	0.0893355	1
Gj4X254T7	0	0.075007	0	0	1
Gj4X268T1	0.174734	0	0	0	1
Gj4X278T14	0.811935	0	0	0	1
Gj4X278T26	0.0574334	0	0	0	1
Gj4X290T5	0.493367	0	0	0	1
Gj4X301T6	0	0.258263	0	0	1
Gj4X302T13	0.599089	0	0	0	1
Gj4X304T32	0	0.32889	0	0	1
Gj4X318T53	0.0835588	0	0	0	1
Gj4X318T55	0.245418	0	0	0	1
Gj4X325T3	0	0	0.187402	0	1
Gj4X327T3	1.38777	0	0	0	1
Gj4X32T49	0.151925	0	0	0	1
Gj4X346T3	0.0677504	0	0	0	1
Gj4X348T14	0	0	0	0.111379	1
Gj4X351T20	0.140829	0	0	0	1
Gj4X351T23	0	0.0910149	0	0	1
Gj4X356T20	0.470407	0	0	0	1
Gj4X356T5	0.0866539	0	0	0	1
Gj4X358T15	0	0	0	0.0226884	1
Gj4X358T37	0	0	0	0.110252	1
Gj4X361T11	0.178452	0	0	0	1
Gj4X361T13	0	0	0	0.214405	1
Gj4X365T16	0.33549	0	0	0	1
Gj4X369T27	0.570255	0	0	0	1
Gj4X386T11	0	0	0	0.0735711	1
Gj4X388T31	0.147457	0	0	0	1
Gj4X389T26	0	0.201395	0	0	1
Gj4X403T62	5.86539	0	0	0	1
Gj4X404T34	0	0	0	0.0348626	1
Gj4X406T9	0	0	0.0168267	0	1
Gj4X410T48	0	0.0416248	0	0	1
Gj4X410T50	0	0.0860728	0	0	1
Gj4X414T6	0.388482	0	0	0	1
Gj4X418T29	0.0667469	0	0	0	1
Gj4X418T30	0.065857	0	0	0	1
Gj4X419T8	0	0.11023	0	0	1
Gj4X422T54	0	0.115883	0	0	1
Gj4X427T15	0	0.154606	0	0	1
Gj4X431T1	0.149658	0	0	0	1
Gj4X458T36	0	0.0360748	0	0	1
Gj4X462T24	0.322756	0	0	0	1
Gj4X468T49	0.557059	0	0	0	1
Gj4X471T51	0	0.172175	0	0	1
Gj4X471T55	0	0	0.541384	0	1
Gj4X471T75	0	0.296689	0	0	1
Gj4X474T38	0.0866539	0	0	0	1
Gj4X481T39	0	0	0.407498	0	1
Gj4X485T30	0	0	0.011133	0	1
Gj4X490T78	0	0	0.127051	0	1
Gj4X492T54	0	0	0.037771	0	1
Gj4X492T81	0	0	0.426021	0	1
Gj4X497T56	0.0271389	0	0	0	1
Gj4X501T14	0	0	0	0.866749	1
Gj4X501T15	0.141712	0	0	0	1
Gj4X505T26	0	0.0251685	0	0	1
Gj4X56T73	0.190619	0	0	0	1
Gj4X58T34	0	0.137182	0	0	1
Gj4X92T8	0	0	0.0901198	0	1
Gj5A104T34	0	0	0.0328282	0	1
Gj5A112T37	0.0355343	0	0	0	1
Gj5A119T24	0	0	0.0565742	0	1
Gj5A120T114	0	0.0604828	0	0	1
Gj5A150T44	0.0893986	0	0	0	1
Gj5A164T27	0	0.0301296	0	0	1
Gj5A189T4	0	0	0.0187449	0	1
Gj5A194T16	0	0	0.0459666	0	1
Gj5A20T35	0	0	0	0.249263	1
Gj5A214T33	0	0	0	0.017354	1
Gj5A240T34	0	0.0225468	0	0	1
Gj5A252T11	0.0331495	0	0	0	1
Gj5A261T32	0	0	0.0218983	0	1
Gj5A26T16	1.02332	0	0	0	1
Gj5A277T50	0.192828	0	0	0	1
Gj5A285T12	0	0.623318	0	0	1
Gj5A297T13	0.423399	0	0	0	1
Gj5A306T73	0.10997	0	0	0	1
Gj5A306T79	0	0	0	0.137034	1
Gj5A307T32	0.00854546	0	0	0	1
Gj5A311T30	0.382395	0	0	0	1
Gj5A312T47	0.109762	0	0	0	1
Gj5A316T46	0	0.0244378	0	0	1
Gj5A316T49	0.76175	0	0	0	1
Gj5A319T16	0.0338306	0	0	0	1
Gj5A319T17	0	0.0291373	0	0	1
Gj5A319T18	0	0	0	0.0375835	1
Gj5A321T18	13.908	0	0	0	1
Gj5A323T31	0.0493367	0	0	0	1
Gj5A329T41	0.0441434	0	0	0	1
Gj5A359T42	0.0683742	0	0	0	1
Gj5A359T43	0	0	0	0.162943	1
Gj5A369T41	0.0192368	0	0	0	1
Gj5A373T22	0.127192	0	0	0	1
Gj5A374T82	0.459619	0	0	0	1
Gj5A374T86	0.185223	0	0	0	1
Gj5A375T50	0.0208897	0	0	0	1
Gj5A378T60	0.0579599	0	0	0	1
Gj5A391T92	0	0.0118319	0	0	1
Gj5A54T50	0	0.0210436	0	0	1
Gj5A55T30	0.294913	0	0	0	1
Gj5A66T20	0	0	0	0.0331437	1
Gj5A68T76	0.0524977	0	0	0	1
Gj5A68T77	0.0381257	0	0	0	1
Gj5A68T78	0.109762	0	0	0	1
Gj5A72T78	0.00797266	0	0	0	1
Gj5A72T79	0.319665	0	0	0	1
Gj5A7T109	0	0.0430252	0	0	1
Gj5A82T61	0	0	0.0160719	0	1
Gj5A9T18	0	0.00784235	0	0	1
Gj5E220T0	0	0.227597	0	0	1
Gj5E27T0	0	0	0.0812076	0	1
Gj5P122T4	0	0.0354005	0	0	1
Gj5P122T6	0	0.0218682	0	0	1
Gj5P129T1	0.229251	0	0	0	1
Gj5P133T2	0.0681649	0	0	0	1
Gj5P13T12	0	0	0.0226626	0	1
Gj5P13T3	0.0903339	0	0	0	1
Gj5P13T4	0.0371374	0	0	0	1
Gj5P14T10	0	0	0.00488712	0	1
Gj5P14T5	0.339339	0	0	0	1
Gj5P14T7	0.197595	0	0	0	1
Gj5P17T21	0	0.0170624	0	0	1
Gj5P206T2	0.136256	0	0	0	1
Gj5P229T2	0.412943	0	0	0	1
Gj5P22T21	0	0.0197284	0	0	1
Gj5P23T12	0.0998481	0	0	0	1
Gj5P29T0	0	0	0.0257777	0	1
Gj5P305T10	0.0983045	0	0	0	1
Gj5P305T4	0	0.034435	0	0	1
Gj5P31T6	0.680682	0	0	0	1
Gj5P32T2	0	0.0295388	0	0	1
Gj5P32T5	0	0.127323	0	0	1
Gj5P339T5	0	0	0.043896	0	1
Gj5P363T6	0	0.0688701	0	0	1
Gj5P380T11	0.106168	0	0	0	1
Gj5P388T14	0	0	0	0.0329854	1
Gj5P388T16	0	0.0166062	0	0	1
Gj5P40T7	0.0307578	0	0	0	1
Gj5P47T12	0	0.0215219	0	0	1
Gj5P4T2	0	0.0246766	0	0	1
Gj5P50T1	1.99808	0	0	0	1
Gj5P51T1	0.690693	0	0	0	1
Gj5P51T4	0	0.0100208	0	0	1
Gj5P55T4	0.0780208	0	0	0	1
Gj5P56T1	0.0522243	0	0	0	1
Gj5P57T14	0.882603	0	0	0	1
Gj5P57T15	0	0.141602	0	0	1
Gj5P58T9	0.0308705	0	0	0	1
Gj5P75T6	0.116906	0	0	0	1
Gj5P81T3	0.0393568	0	0	0	1
Gj5P85T3	0	0	0.0426763	0	1
Gj5P86T3	0.258521	0	0	0	1
Gj5P86T5	0	0	0.015179	0	1
Gj5P8T1	0	0	0.336031	0	1
Gj5P91T3	0	0.0327495	0	0	1
Gj5P91T4	0	0.104017	0	0	1
Gj5P91T8	0.391988	0	0	0	1
Gj5P96T5	0	0.0562553	0	0	1
Gj5P96T6	0	0.0971245	0	0	1
Gj5X101T11	0.048675	0	0	0	1
Gj5X107T7	0	0	1.27449	0	1
Gj5X110T9	0	0.12554	0	0	1
Gj5X114T7	0.334866	0	0	0	1
Gj5X126T10	0	0	0	0.326472	1
Gj5X126T23	0	0	0	1.18896	1
Gj5X126T24	0	0	0	0.104907	1
Gj5X129T17	0	0.105103	0	0	1
Gj5X132T27	0	0.0394398	0	0	1
Gj5X133T50	0.26387	0	0	0	1
Gj5X152T1	5.57644	0	0	0	1
Gj5X156T9	0.0641464	0	0	0	1
Gj5X157T4	0	0	0	0.0437561	1
Gj5X157T5	0	0.0985995	0	0	1
Gj5X163T15	0	0	0	0.208005	1
Gj5X16T11	0	0	0.404302	0	1
Gj5X174T7	0.129981	0	0	0	1
Gj5X180T6	0	0	0	0.0549757	1
Gj5X185T22	0	0	0	0.259885	1
Gj5X186T15	0.98637	0	0	0	1
Gj5X18T100	0.506892	0	0	0	1
Gj5X207T3	3.73804	0	0	0	1
Gj5X211T10	0.0726364	0	0	0	1
Gj5X215T26	0	0	0	0.347684	1
Gj5X222T18	0	0.140291	0	0	1
Gj5X222T9	0	0.173334	0	0	1
Gj5X226T21	0.116594	0	0	0	1
Gj5X229T4	0	0	0	0.337003	1
Gj5X237T1	0.192828	0	0	0	1
Gj5X240T12	0.0599089	0	0	0	1
Gj5X252T3	0.0299544	0	0	0	1
Gj5X255T16	0.0595093	0	0	0	1
Gj5X268T6	0.042216	0	0	0	1
Gj5X268T8	0.238997	0	0	0	1
Gj5X275T6	0	0	0	0.0384583	1
Gj5X277T41	0.064276	0	0	0	1
Gj5X282T4	0.3446	0	0	0	1
Gj5X300T14	0	0	0	0.127775	1
Gj5X300T15	0	0	0	0.357342	1
Gj5X301T12	0	0	0	0.111707	1
Gj5X303T35	0.0590651	0	0	0	1
Gj5X315T20	0	0	0	0.0680651	1
Gj5X346T1	0	0	0.901198	0	1
Gj5X350T12	0	0	0	0.0332411	1
Gj5X354T4	0	0.0785989	0	0	1
Gj5X359T8	2.09255	0	0	0	1
Gj5X363T48	0.068601	0	0	0	1
Gj5X366T33	0	0	0	0.402144	1
Gj5X36T26	0.137357	0	0	0	1
Gj5X373T9	0.828971	0	0	0	1
Gj5X375T6	0	0.0418547	0	0	1
Gj5X376T32	0	0.0676403	0	0	1
Gj5X378T18	0.548808	0	0	0	1
Gj5X385T9	0.0706131	0	0	0	1
Gj5X387T18	2.8819	0	0	0	1
Gj5X389T19	0	0.15552	0	0	1
Gj5X392T14	0	0.062096	0	0	1
Gj5X396T2	0.465958	0	0	0	1
Gj5X397T2	0.0942386	0	0	0	1
Gj5X39T51	0	0.0823447	0	0	1
Gj5X45T24	5.66605	0	0	0	1
Gj5X46T34	0	0.043878	0	0	1
Gj5X48T13	0.151978	0	0	0	1
Gj5X58T43	0.0791249	0	0	0	1
Gj5X66T22	0	0	0.192044	0	1
Gj5X67T17	0	0.0278978	0	0	1
Gj5X69T11	0.105091	0	0	0	1
Gj5X7T16	0.472764	0	0	0	1
Gj5X83T7	0	0	0.0473054	0	1
Gj6A103T7	0	0.0623371	0	0	1
Gj6A119T29	0	0	0	0.120792	1
Gj6A119T30	0	0	0	0.736606	1
Gj6A135T24	0.0291561	0	0	0	1
Gj6A143T24	0.00758476	0	0	0	1
Gj6A164T47	0	0	0.027711	0	1
Gj6A166T20	0	0.347881	0	0	1
Gj6A176T36	0	0.0913017	0	0	1
Gj6A181T21	0.0721062	0	0	0	1
Gj6A204T23	0.115539	0	0	0	1
Gj6A205T28	0.190083	0	0	0	1
Gj6A205T29	0.202158	0	0	0	1
Gj6A225T77	0.0259097	0	0	0	1
Gj6A229T10	0	0	0	0.341279	1
Gj6A22T32	0	0.154606	0	0	1
Gj6A241T86	0.0511585	0	0	0	1
Gj6A241T89	0	0	0	0.0138326	1
Gj6A255T3	0.457247	0	0	0	1
Gj6A256T50	0.426436	0	0	0	1
Gj6A262T46	0.208897	0	0	0	1
Gj6A263T45	0.244289	0	0	0	1
Gj6A265T54	1.13272	0	0	0	1
Gj6A273T22	0.0382979	0	0	0	1
Gj6A27T115	0	0	0	0.0319636	1
Gj6A280T115	0	0.0479475	0	0	1
Gj6A284T59	0	0	0.0116864	0	1
Gj6A291T44	0	0.221512	0	0	1
Gj6A297T85	0	0.0870771	0	0	1
Gj6A298T95	0	0	0	0.0369664	1
Gj6A299T21	0	0	0	0.0188903	1
Gj6A301T44	0.0521757	0	0	0	1
Gj6A303T28	0.0783854	0	0	0	1
Gj6A305T53	0.0306104	0	0	0	1
Gj6A311T77	0	0	0.102534	0	1
Gj6A313T62	0	0.0250023	0	0	1
Gj6A314T58	0.0702645	0	0	0	1
Gj6A31T53	2.7384	0	0	0	1
Gj6A321T71	0.0253209	0	0	0	1
Gj6A328T114	0	0.0197323	0	0	1
Gj6A330T68	0.104911	0	0	0	1
Gj6A331T74	0.64356	0	0	0	1
Gj6A334T82	0	0	0.0391926	0	1
Gj6A37T34	0.034064	0	0	0	1
Gj6A37T35	0	0	0.0492167	0	1
Gj6A3T51	0.0669732	0	0	0	1
Gj6A41T71	0	0	0	0.0276652	1
Gj6A47T47	0	0	0.0085332	0	1
Gj6A59T47	0.118687	0	0	0	1
Gj6A61T60	0	0.0132535	0	0	1
Gj6A69T89	0.0354824	0	0	0	1
Gj6A74T22	0.504909	0	0	0	1
Gj6A7T25	0.0366255	0	0	0	1
Gj6A80T16	0	0.010761	0	0	1
Gj6A84T56	0	0	0.133892	0	1
Gj6A92T35	0	0.1497	0	0	1
Gj6A92T36	0	0	0	0.0949946	1
Gj6E231T0	0	0	0.0479949	0	1
Gj6E329T5	0	0.763022	0	0	1
Gj6E6T2	0.0851599	0	0	0	1
Gj6MP6T9	0.0248194	0	0	0	1
Gj6P112T1	0	0.0572513	0	0	1
Gj6P114T3	0	0.0114092	0	0	1
Gj6P15T5	0.0658315	0	0	0	1
Gj6P15T6	0	0.0719782	0	0	1
Gj6P167T4	0.0649904	0	0	0	1
Gj6P16T8	0	0	0	0.072373	1
Gj6P205T4	0.0531105	0	0	0	1
Gj6P211T2	0.0279055	0	0	0	1
Gj6P231T2	0	0	0	0.0482251	1
Gj6P232T0	0	0.0291577	0	0	1
Gj6P238T9	0.0331495	0	0	0	1
Gj6P23T18	0.067639	0	0	0	1
Gj6P246T3	0.0204567	0	0	0	1
Gj6P24T4	0.0737205	0	0	0	1
Gj6P25T2	0	0.0653078	0	0	1
Gj6P265T3	0.0514208	0	0	0	1
Gj6P266T3	0	0.0259442	0	0	1
Gj6P272T6	0	0	0	0.0440806	1
Gj6P274T4	0	0.0268908	0	0	1
Gj6P27T24	0.193835	0	0	0	1
Gj6P280T10	0.531923	0	0	0	1
Gj6P284T6	0	0.0420413	0	0	1
Gj6P289T10	0.148917	0	0	0	1
Gj6P289T3	0	0	0.0378411	0	1
Gj6P294T6	0	0.145687	0	0	1
Gj6P298T5	0	0.357908	0	0	1
Gj6P301T9	0	0.023823	0	0	1
Gj6P302T1	0.0994516	0	0	0	1
Gj6P305T3	0	0.0936428	0	0	1
Gj6P317T5	0.452039	0	0	0	1
Gj6P318T13	0.622549	0	0	0	1
Gj6P325T7	0.049541	0	0	0	1
Gj6P33T10	0.0532646	0	0	0	1
Gj6P33T16	0.0657823	0	0	0	1
Gj6P36T3	0.112256	0	0	0	1
Gj6P3T1	0.21597	0	0	0	1
Gj6P40T1	0	0.0398722	0	0	1
Gj6P43T4	0	0.135923	0	0	1
Gj6P44T2	0.044498	0	0	0	1
Gj6P44T4	0.0349065	0	0	0	1
Gj6P46T3	0.049924	0	0	0	1
Gj6P53T3	0.631478	0	0	0	1
Gj6P55T9	0	0	0.0620694	0	1
Gj6P58T3	0.0414369	0	0	0	1
Gj6P60T6	0	0	0	0.0560536	1
Gj6P6T9	0.0242121	0	0	0	1
Gj6P7T2	0.0187094	0	0	0	1
Gj6P80T6	0	0	0	0.404751	1
Gj6P9T6	0.042216	0	0	0	1
Gj6X0T11	0	0	0	0.100897	1
Gj6X117T14	0	0.0823447	0	0	1
Gj6X118T15	0.0784012	0	0	0	1
Gj6X121T32	0	0.0171396	0	0	1
Gj6X14T45	0.21788	0	0	0	1
Gj6X166T8	0	0.383739	0	0	1
Gj6X167T5	0	0	0	0.138326	1
Gj6X16T106	0	0	0	0.42881	1
Gj6X171T5	0.625913	0	0	0	1
Gj6X181T9	0.145273	0	0	0	1
Gj6X194T5	0.224512	0	0	0	1
Gj6X199T3	0	0	0	0.0644827	1
Gj6X213T21	0	0	0	0.0928024	1
Gj6X21T35	0.082189	0	0	0	1
Gj6X224T3	0.420364	0	0	0	1
Gj6X231T5	0.128759	0	0	0	1
Gj6X238T19	0	0	0.0578547	0	1
Gj6X23T59	0	0	0.609057	0	1
Gj6X244T6	0	0.0772553	0	0	1
Gj6X245T8	0	0	0	0.580394	1
Gj6X247T4	0.0748646	0	0	0	1
Gj6X25T9	0.0352805	0	0	0	1
Gj6X286T15	0	0	0.157963	0	1
Gj6X289T39	0	0.0971245	0	0	1
Gj6X294T27	0	0.218854	0	0	1
Gj6X297T41	0	0.542184	0	0	1
Gj6X302T6	0.30443	0	0	0	1
Gj6X309T21	0	0.213513	0	0	1
Gj6X310T30	0.138484	0	0	0	1
Gj6X311T68	0.0754088	0	0	0	1
Gj6X315T69	0	0.0326539	0	0	1
Gj6X317T46	0	0.105218	0	0	1
Gj6X317T47	0.453364	0	0	0	1
Gj6X324T29	0.536878	0	0	0	1
Gj6X324T67	0.432078	0	0	0	1
Gj6X328T43	0	0.112511	0	0	1
Gj6X328T45	0	0.229567	0	0	1
Gj6X328T46	0	0.276711	0	0	1
Gj6X331T41	0.34658	0	0	0	1
Gj6X338T24	0	0.11307	0	0	1
Gj6X34T21	0.90474	0	0	0	1
Gj6X46T37	0	0	0.223154	0	1
Gj6X56T1	0.349468	0	0	0	1
Gj6X59T12	0.17032	0	0	0	1
Gj6X64T33	0	0.125868	0	0	1
Gj6X70T9	0	0.26366	0	0	1
Gj6X84T52	0	1.88875	0	0	1
Gj6X85T9	0.581279	0	0	0	1
Gj6X92T34	3.2297	0	0	0	1
Gj7A113T20	0	0.0139921	0	0	1
Gj7A11T20	0.00767769	0	0	0	1
Gj7A12T20	0	0.357191	0	0	1
Gj7A169T41	0.106795	0	0	0	1
Gj7A171T38	0	0.00889653	0	0	1
Gj7A174T22	0.0322586	0	0	0	1
Gj7A182T8	0	0	0.0681462	0	1
Gj7A185T18	0.0388919	0	0	0	1
Gj7A192T56	0.11813	0	0	0	1
Gj7A192T61	0	0	0	0.0442072	1
Gj7A198T38	0.0441007	0	0	0	1
Gj7A210T21	0.0200783	0	0	0	1
Gj7A231T32	0	0	0	0.0192107	1
Gj7A232T22	0	0.201812	0	0	1
Gj7A240T2	0	0.044563	0	0	1
Gj7A241T5	0.0498917	0	0	0	1
Gj7A285T79	0.0566705	0	0	0	1
Gj7A292T9	0	0.41583	0	0	1
Gj7A296T59	0.0940814	0	0	0	1
Gj7A296T76	0.0407363	0	0	0	1
Gj7A296T77	0.203668	0	0	0	1
Gj7A313T17	0.0872483	0	0	0	1
Gj7A319T7	0.0230419	0	0	0	1
Gj7A326T43	0.0407148	0	0	0	1
Gj7A335T59	0	0.0115483	0	0	1
Gj7A335T60	0.114208	0	0	0	1
Gj7A343T48	0.0302788	0	0	0	1
Gj7A353T60	0	0	0	0.0258165	1
Gj7A356T49	0	0	0	0.0206464	1
Gj7A368T97	0	0.129257	0	0	1
Gj7A385T156	1.1062	0	0	0	1
Gj7A394T83	0	0	0	0.0587411	1
Gj7A398T78	0	0	0.0431191	0	1
Gj7A399T90	1.72567	0	0	0	1
Gj7A401T161	0	0.0533501	0	0	1
Gj7A402T56	0.260443	0	0	0	1
Gj7A404T94	1.52899	0	0	0	1
Gj7A407T106	0	0	0	1.52259	1
Gj7A409T55	0	0.391473	0	0	1
Gj7A412T56	0.0506272	0	0	0	1
Gj7A412T62	0.244504	0	0	0	1
Gj7A46T27	0	0	0.0344749	0	1
Gj7A51T78	0	0.0517588	0	0	1
Gj7A51T82	0.212313	0	0	0	1
Gj7A57T90	0.56656	0	0	0	1
Gj7A57T92	0.288927	0	0	0	1
Gj7A64T49	0	0	0	0.0446457	1
Gj7A68T28	0.0700606	0	0	0	1
Gj7A68T30	0.110033	0	0	0	1
Gj7A73T42	0	0.0332589	0	0	1
Gj7A74T46	0	0.153911	0	0	1
Gj7A74T48	0	0.0293632	0	0	1
Gj7A75T56	0	0.148961	0	0	1
Gj7A77T43	0	0	0	0.0105273	1
Gj7A78T112	0	0	0	0.103437	1
Gj7E170T0	0	0	0.0573264	0	1
Gj7E171T1	0	0.349441	0	0	1
Gj7E202T1	0	0	0.101509	0	1
Gj7E319T0	0	0	0	0.373111	1
Gj7E320T2	0.716218	0	0	0	1
Gj7P101T0	0.10932	0	0	0	1
Gj7P109T1	0	0	0	0.0274878	1
Gj7P112T2	0.0823212	0	0	0	1
Gj7P12T4	0.0299544	0	0	0	1
Gj7P15T6	0	0.0177417	0	0	1
Gj7P16T5	0.395641	0	0	0	1
Gj7P185T10	0	0.0479475	0	0	1
Gj7P188T2	0	0	0	0.0232417	1
Gj7P217T4	0	0	0.0185549	0	1
Gj7P227T0	0.0411606	0	0	0	1
Gj7P227T2	0.104535	0	0	0	1
Gj7P256T3	0.0199164	0	0	0	1
Gj7P26T2	0	0	0	0.0186439	1
Gj7P295T5	0	0	0	0.329854	1
Gj7P303T8	0	0.294691	0	0	1
Gj7P326T10	0	0.215126	0	0	1
Gj7P327T3	0	0.113636	0	0	1
Gj7P328T4	0	0	0.23047	0	1
Gj7P330T2	0.632026	0	0	0	1
Gj7P342T3	0.149108	0	0	0	1
Gj7P342T4	0.0765779	0	0	0	1
Gj7P343T7	0.186383	0	0	0	1
Gj7P34T3	0	0.0583495	0	0	1
Gj7P34T9	0	0	0	0.0175025	1
Gj7P350T5	0	0.0375655	0	0	1
Gj7P354T15	0.725031	0	0	0	1
Gj7P354T16	0.186034	0	0	0	1
Gj7P357T10	0.0404858	0	0	0	1
Gj7P357T7	0	0.118865	0	0	1
Gj7P363T5	0	0	0	0.0726766	1
Gj7P36T7	0.101283	0	0	0	1
Gj7P384T13	0.453725	0	0	0	1
Gj7P384T7	1.46665	0	0	0	1
Gj7P385T25	0.395788	0	0	0	1
Gj7P394T33	0.181591	0	0	0	1
Gj7P399T11	0	0	0	0.0366504	1
Gj7P412T9	0.0797266	0	0	0	1
Gj7P43T5	0	0	0	0.25437	1
Gj7P48T1	0	0	0.0502315	0	1
Gj7P50T4	0	0	0	0.0199753	1
Gj7P62T5	0.0388646	0	0	0	1
Gj7P64T7	1.76268	0	0	0	1
Gj7P71T2	0	0	0	0.0322414	1
Gj7P72T1	0	0.0146816	0	0	1
Gj7P75T8	0	0	0	0.0414309	1
Gj7P76T2	0.0706131	0	0	0	1
Gj7P79T1	0.135501	0	0	0	1
Gj7P79T5	0	0.095146	0	0	1
Gj7P80T2	0.256752	0	0	0	1
Gj7P81T1	0.0455233	0	0	0	1
Gj7P84T3	0.201603	0	0	0	1
Gj7P86T0	0.151202	0	0	0	1
Gj7P92T8	0.25385	0	0	0	1
Gj7P95T0	0	0	0.0119282	0	1
Gj7X109T9	0	0	0	0.125869	1
Gj7X125T4	0	0	0.0737989	0	1
Gj7X12T16	0.097526	0	0	0	1
Gj7X161T8	0.348054	0	0	0	1
Gj7X170T7	0	0	0	1.6267	1
Gj7X176T33	0	0.0821716	0	0	1
Gj7X177T1	0.245477	0	0	0	1
Gj7X184T11	0.071757	0	0	0	1
Gj7X196T9	0.0317312	0	0	0	1
Gj7X200T9	0	0	0	0.0923461	1
Gj7X203T3	0	0.167111	0	0	1
Gj7X213T4	0.0155323	0	0	0	1
Gj7X215T9	0	0.841745	0	0	1
Gj7X220T5	0.14532	0	0	0	1
Gj7X227T4	0.801076	0	0	0	1
Gj7X238T0	6.54567	0	0	0	1
Gj7X248T4	0.0536878	0	0	0	1
Gj7X249T15	0	0	0.99442	0	1
Gj7X250T14	0.230841	0	0	0	1
Gj7X258T20	0.63546	0	0	0	1
Gj7X258T21	0.0477479	0	0	0	1
Gj7X259T5	0.217224	0	0	0	1
Gj7X263T17	0.103546	0	0	0	1
Gj7X263T5	0	0.0407296	0	0	1
Gj7X266T28	0	0	0.416554	0	1
Gj7X280T12	0	0.102374	0	0	1
Gj7X281T9	0	0.135141	0	0	1
Gj7X287T13	0	0.498187	0	0	1
Gj7X288T34	0.0682113	0	0	0	1
Gj7X293T12	0.0563318	0	0	0	1
Gj7X305T8	0.34064	0	0	0	1
Gj7X309T4	0	0.0236741	0	0	1
Gj7X315T14	0	0	0.0200045	0	1
Gj7X317T30	0	0	0	0.113555	1
Gj7X317T38	0	0.044563	0	0	1
Gj7X326T39	0.0895273	0	0	0	1
Gj7X327T11	0	0.151514	0	0	1
Gj7X327T13	1.05263	0	0	0	1
Gj7X327T15	0	0.0276486	0	0	1
Gj7X32T29	1.25809	0	0	0	1
Gj7X334T44	0.0873671	0	0	0	1
Gj7X337T34	0.143167	0	0	0	1
Gj7X33T45	0.151978	0	0	0	1
Gj7X341T51	0	0.0189393	0	0	1
Gj7X343T14	1.2578	0	0	0	1
Gj7X345T6	0	0.0584293	0	0	1
Gj7X350T58	0.972878	0	0	0	1
Gj7X350T59	0.399597	0	0	0	1
Gj7X358T46	0	0	0.019526	0	1
Gj7X358T50	0	0	0	0.140265	1
Gj7X359T37	0	0	0.0974491	0	1
Gj7X361T86	0.318319	0	0	0	1
Gj7X368T58	0.421944	0	0	0	1
Gj7X371T21	0	0	0.219125	0	1
Gj7X372T22	0	0	0	0.73427	1
Gj7X372T28	0.233187	0	0	0	1
Gj7X375T15	0	0.394398	0	0	1
Gj7X375T18	1.74368	0	0	0	1
Gj7X382T20	0.146815	0	0	0	1
Gj7X390T15	0	0	0.182899	0	1
Gj7X3T50	0	0	0.115709	0	1
Gj7X406T95	0	0	0.0832898	0	1
Gj7X53T13	2.7009	0	0	0	1
Gj7X63T23	0.0230419	0	0	0	1
Gj7X78T103	0	0	0	0.0558533	1
Gj7X78T60	0	0.0565351	0	0	1
Gj7X80T29	0	0.134391	0	0	1
Gj7X82T16	0	0.170545	0	0	1
Gj7X90T0	0.137202	0	0	0	1
Gj7X94T13	0	0	0.109493	0	1
Gj7X96T25	0	0.0800251	0	0	1
Gj7X96T6	0	0.0923867	0	0	1
Gj8A0T63	0	0.128596	0	0	1
Gj8A103T19	0	0.0280582	0	0	1
Gj8A108T1	0.0686785	0	0	0	1
Gj8A10T54	0.274893	0	0	0	1
Gj8A11T62	0	0.0278519	0	0	1
Gj8A141T10	0	0	0.0317427	0	1
Gj8A14T53	0	0.011837	0	0	1
Gj8A155T51	0	0.0642009	0	0	1
Gj8A182T15	0	0.00949337	0	0	1
Gj8A185T56	0.0477225	0	0	0	1
Gj8A18T135	0.0954958	0	0	0	1
Gj8A18T138	0.0403206	0	0	0	1
Gj8A19T18	0.139753	0	0	0	1
Gj8A204T4	0	0.0329379	0	0	1
Gj8A20T123	0	0.0261231	0	0	1
Gj8A23T47	0.200238	0	0	0	1
Gj8A240T15	0	0.0241265	0	0	1
Gj8A249T26	0.0294397	0	0	0	1
Gj8A256T22	0	0.0201761	0	0	1
Gj8A257T32	0	0	0	0.296203	1
Gj8A306T34	0.671812	0	0	0	1
Gj8A324T42	1.97024	0	0	0	1
Gj8A337T8	0.207969	0	0	0	1
Gj8A351T85	0	0.013749	0	0	1
Gj8A361T69	16.5351	0	0	0	1
Gj8A361T70	1.34365	0	0	0	1
Gj8A36T73	0	0.0413973	0	0	1
Gj8A382T92	0	0	0	0.487703	1
Gj8A383T62	10.4921	0	0	0	1
Gj8A385T63	0.0399941	0	0	0	1
Gj8A391T82	0	0.0232362	0	0	1
Gj8A392T56	0.0577104	0	0	0	1
Gj8A395T115	0	0.021939	0	0	1
Gj8A3T72	0	0.0480791	0	0	1
Gj8A45T47	0.232533	0	0	0	1
Gj8A48T40	0	0	0.0197453	0	1
Gj8A61T29	0.0638666	0	0	0	1
Gj8A71T55	0	0.0241265	0	0	1
Gj8A86T67	0.0347836	0	0	0	1
Gj8A86T69	0.0450927	0	0	0	1
Gj8A86T70	0.462059	0	0	0	1
Gj8A88T85	0.215057	0	0	0	1
Gj8A88T86	0.713451	0	0	0	1
Gj8A95T27	0	0	0.0482421	0	1
Gj8A9T103	0	0	0.0293521	0	1
Gj8A9T97	0.0425246	0	0	0	1
Gj8E0T1	0	0	0.0549168	0	1
Gj8E261T0	0	0	0.255613	0	1
Gj8E350T0	0.0726364	0	0	0	1
Gj8P0T12	0	0.0270561	0	0	1
Gj8P117T3	0.0873437	0	0	0	1
Gj8P121T5	0	0.0935273	0	0	1
Gj8P137T0	0	0	0.0812076	0	1
Gj8P142T1	0	0.0242706	0	0	1
Gj8P147T0	0	0.0505047	0	0	1
Gj8P18T11	0	0.109793	0	0	1
Gj8P19T6	0.0535895	0	0	0	1
Gj8P1T10	0.112034	0	0	0	1
Gj8P240T6	0	0	0.0168016	0	1
Gj8P24T4	0	0	0	0.0772631	1
Gj8P250T2	0	0	0	0.0301979	1
Gj8P269T2	0.0263198	0	0	0	1
Gj8P26T11	0	0	0.0108653	0	1
Gj8P27T3	0.115254	0	0	0	1
Gj8P280T7	0.016741	0	0	0	1
Gj8P28T0	0.0634624	0	0	0	1
Gj8P28T3	0	0.0267422	0	0	1
Gj8P300T0	0	0.0308324	0	0	1
Gj8P301T1	0	0.00735506	0	0	1
Gj8P306T6	0.449061	0	0	0	1
Gj8P327T7	0.153156	0	0	0	1
Gj8P333T11	0.19323	0	0	0	1
Gj8P361T14	17.9826	0	0	0	1
Gj8P362T16	0.20907	0	0	0	1
Gj8P37T11	0	0.0849953	0	0	1
Gj8P384T5	0	0	0	0.0461086	1
Gj8P40T5	0.192313	0	0	0	1
Gj8P43T13	0.0212874	0	0	0	1
Gj8P47T5	0.135323	0	0	0	1
Gj8P52T6	0.0931915	0	0	0	1
Gj8P56T6	0	0	0.0620693	0	1
Gj8P5T12	0.136748	0	0	0	1
Gj8P60T12	0.513017	0	0	0	1
Gj8P60T15	0.627833	0	0	0	1
Gj8P60T16	0.132361	0	0	0	1
Gj8P64T14	0.125183	0	0	0	1
Gj8P64T8	0.0149658	0	0	0	1
Gj8P6T4	0	0	0	0.0193158	1
Gj8P80T2	1.04915	0	0	0	1
Gj8P86T11	0.0489037	0	0	0	1
Gj8P88T2	0	0.0259442	0	0	1
Gj8P90T13	0	0.0149718	0	0	1
Gj8P97T2	0.0315813	0	0	0	1
Gj8X101T23	0	0	0	0.0304121	1
Gj8X102T7	0.320428	0	0	0	1
Gj8X103T10	0	0	0.150622	0	1
Gj8X114T10	0.142479	0	0	0	1
Gj8X119T8	2.37419	0	0	0	1
Gj8X120T45	0.049147	0	0	0	1
Gj8X121T12	0.184311	0	0	0	1
Gj8X154T32	0	0.0298598	0	0	1
Gj8X154T6	0.212442	0	0	0	1
Gj8X161T4	0	0.315655	0	0	1
Gj8X172T1	0	0	0	0.0548378	1
Gj8X188T10	0.269415	0	0	0	1
Gj8X189T1	0	0	0.286615	0	1
Gj8X19T7	0	0	0.126655	0	1
Gj8X201T2	0.0997833	0	0	0	1
Gj8X232T9	0	0.809837	0	0	1
Gj8X246T16	0.88474	0	0	0	1
Gj8X246T17	0.0987855	0	0	0	1
Gj8X254T6	0.0516859	0	0	0	1
Gj8X261T5	0	0.120249	0	0	1
Gj8X264T23	0	0.242706	0	0	1
Gj8X267T17	0	0	0	0.186503	1
Gj8X27T8	1.17338	0	0	0	1
Gj8X280T17	0	0	0	0.674006	1
Gj8X281T11	0	0	0.0711272	0	1
Gj8X282T26	0	0	0.0781038	0	1
Gj8X286T11	0.0945949	0	0	0	1
Gj8X294T52	0	0.236639	0	0	1
Gj8X300T24	0	0	0.18539	0	1
Gj8X311T23	0	0	0	0.128344	1
Gj8X311T27	0.168003	0	0	0	1
Gj8X311T30	0	0	0	0.0416321	1
Gj8X312T28	0.214751	0	0	0	1
Gj8X313T2	0.319476	0	0	0	1
Gj8X314T4	0.0919914	0	0	0	1
Gj8X318T16	0	0	0	0.0809076	1
Gj8X329T2	0	0.0591852	0	0	1
Gj8X333T26	0.431585	0	0	0	1
Gj8X339T6	0	0	0	0.242262	1
Gj8X343T26	0.0212438	0	0	0	1
Gj8X343T84	0	0	0	0.290197	1
Gj8X349T24	0.102317	0	0	0	1
Gj8X349T57	0.097526	0	0	0	1
Gj8X350T18	0.147457	0	0	0	1
Gj8X350T38	6.35047	0	0	0	1
Gj8X356T22	0.266988	0	0	0	1
Gj8X357T40	0	0	0.0867993	0	1
Gj8X357T45	0	0.199387	0	0	1
Gj8X360T17	0.390894	0	0	0	1
Gj8X362T50	0.127079	0	0	0	1
Gj8X367T32	0.0822278	0	0	0	1
Gj8X375T34	0.0539089	0	0	0	1
Gj8X388T41	0.0301175	0	0	0	1
Gj8X393T47	0.0530838	0	0	0	1
Gj8X393T48	0.411606	0	0	0	1
Gj8X39T21	0.417794	0	0	0	1
Gj8X400T117	0	0.803484	0	0	1
Gj8X55T25	0	0.039995	0	0	1
Gj8X61T12	0.0479541	0	0	0	1
Gj8X62T10	0	0	0.128029	0	1
Gj8X62T16	0.607771	0	0	0	1
Gj8X62T17	0.143862	0	0	0	1
Gj8X62T19	0	0.0610944	0	0	1
Gj8X65T47	0	0.474884	0	0	1
Gj8X74T37	0	0	0	0.0327336	1
Gj8X90T24	0	0.0339807	0	0	1
Gj8X98T25	0.511508	0	0	0	1
Gj9A1004T78	0.05203	0	0	0	1
Gj9A1018T100	0	0	0	0.0345815	1
Gj9A1018T101	0	0	0.0969643	0	1
Gj9A1018T110	0.49602	0	0	0	1
Gj9A1030T88	0.104449	0	0	0	1
Gj9A1033T108	0.159115	0	0	0	1
Gj9A1035T100	0	0	0.0825994	0	1
Gj9A1035T116	0.7199	0	0	0	1
Gj9A1042T93	0	0	0.0902306	0	1
Gj9A1048T97	0	0.0785989	0	0	1
Gj9A1059T87	0.423605	0	0	0	1
Gj9A1072T99	0	0	0.0248606	0	1
Gj9A1081T125	0	0.0498402	0	0	1
Gj9A1089T125	0	0	0	0.0246443	1
Gj9A112T69	0	0.0949461	0	0	1
Gj9A123T93	0	0	0.00631722	0	1
Gj9A124T90	0.0334805	0	0	0	1
Gj9A126T126	0.0155176	0	0	0	1
Gj9A143T85	0	0	0	0.0495734	1
Gj9A171T80	0.453847	0	0	0	1
Gj9A207T93	0	0.0728259	0	0	1
Gj9A21T92	0	0	0	0.0273962	1
Gj9A258T82	0	0	0.0560052	0	1
Gj9A262T106	0	0	0	0.00610841	1
Gj9A26T93	0	0.0272508	0	0	1
Gj9A288T67	0.163485	0	0	0	1
Gj9A29T94	0	0.0210658	0	0	1
Gj9A2T83	0.0990998	0	0	0	1
Gj9A301T73	0	0.0892214	0	0	1
Gj9A316T91	0.180381	0	0	0	1
Gj9A316T92	0	0	0.0426763	0	1
Gj9A319T83	0.0614338	0	0	0	1
Gj9A331T81	1.43153	0	0	0	1
Gj9A335T40	1.6285	0	0	0	1
Gj9A342T29	0	0	0	0.00928161	1
Gj9A343T56	0.159783	0	0	0	1
Gj9A344T58	0.0609787	0	0	0	1
Gj9A349T75	0	0.0573917	0	0	1
Gj9A357T16	0	0.114416	0	0	1
Gj9A369T48	0	0	0.0222486	0	1
Gj9A371T36	0	0	0.018959	0	1
Gj9A375T20	0.122144	0	0	0	1
Gj9A382T64	0.0293189	0	0	0	1
Gj9A392T27	0.136402	0	0	0	1
Gj9A420T17	0	0	0	0.215434	1
Gj9A432T23	0	0	0	0.0192292	1
Gj9A438T3	0.461257	0	0	0	1
Gj9A444T51	0	0.0159135	0	0	1
Gj9A448T36	0	0.0202665	0	0	1
Gj9A45T71	0.0254931	0	0	0	1
Gj9A467T21	0.0436835	0	0	0	1
Gj9A46T94	0	0.024298	0	0	1
Gj9A511T12	0	0.162759	0	0	1
Gj9A521T52	1.3077	0	0	0	1
Gj9A522T36	0.218334	0	0	0	1
Gj9A522T37	0	0	0.0936798	0	1
Gj9A537T34	0.231461	0	0	0	1
Gj9A543T44	0	0	0	0.0249931	1
Gj9A550T90	0	0.0285337	0	0	1
Gj9A55T58	0	0	0.0457247	0	1
Gj9A565T52	0	0.188138	0	0	1
Gj9A570T81	4.00704	0	0	0	1
Gj9A571T112	0	0.0157827	0	0	1
Gj9A571T113	0.0787135	0	0	0	1
Gj9A577T76	0.260534	0	0	0	1
Gj9A587T113	3.27905	0	0	0	1
Gj9A587T119	0.0425799	0	0	0	1
Gj9A590T82	0.0208849	0	0	0	1
Gj9A595T73	0.101576	0	0	0	1
Gj9A600T101	0.240399	0	0	0	1
Gj9A602T119	0.719857	0	0	0	1
Gj9A604T92	0.102375	0	0	0	1
Gj9A609T77	0	0	0.0342171	0	1
Gj9A609T78	0	0	0	0.0487284	1
Gj9A618T90	0.192116	0	0	0	1
Gj9A619T108	0.147441	0	0	0	1
Gj9A61T111	0.139207	0	0	0	1
Gj9A624T38	0.0919914	0	0	0	1
Gj9A633T37	0	0.144512	0	0	1
Gj9A638T48	0	0	0.067673	0	1
Gj9A654T103	0	0.0332268	0	0	1
Gj9A676T101	0.0920362	0	0	0	1
Gj9A682T134	0.0882013	0	0	0	1
Gj9A703T104	0	0	0.326834	0	1
Gj9A724T174	0	0	0.0374111	0	1
Gj9A726T167	0.0477994	0	0	0	1
Gj9A727T73	12.3327	0	0	0	1
Gj9A727T75	0.173629	0	0	0	1
Gj9A729T102	0.20461	0	0	0	1
Gj9A733T78	0.266599	0	0	0	1
Gj9A735T70	0	0	0	0.0801514	1
Gj9A735T73	0.101283	0	0	0	1
Gj9A740T93	0.101283	0	0	0	1
Gj9A740T98	0	0.253566	0	0	1
Gj9A747T45	0	0	0	0.113555	1
Gj9A74T186	0.0125045	0	0	0	1
Gj9A752T115	0.123812	0	0	0	1
Gj9A754T67	1.06055	0	0	0	1
Gj9A756T93	0.298424	0	0	0	1
Gj9A768T97	0	0	0	0.0722414	1
Gj9A773T88	0.629043	0	0	0	1
Gj9A779T64	0.286689	0	0	0	1
Gj9A779T68	1.3436	0	0	0	1
Gj9A783T89	0.0115254	0	0	0	1
Gj9A799T83	0	0	0.0376404	0	1
Gj9A809T52	1.25932	0	0	0	1
Gj9A810T84	0.24094	0	0	0	1
Gj9A815T111	0.0631217	0	0	0	1
Gj9A815T118	0.0252864	0	0	0	1
Gj9A816T69	0.226098	0	0	0	1
Gj9A817T160	0.0479271	0	0	0	1
Gj9A81T125	0	0	0	0.0141288	1
Gj9A821T85	0.0532523	0	0	0	1
Gj9A821T86	0	0	0	0.0768428	1
Gj9A837T32	0.0297547	0	0	0	1
Gj9A838T51	0.00604768	0	0	0	1
Gj9A839T49	0.713417	0	0	0	1
Gj9A841T87	0	0	0	0.0314672	1
Gj9A843T119	0.97036	0	0	0	1
Gj9A849T96	0	0	0.0183056	0	1
[truncated: 26,394 more rows]
