# Supplementary material for: Integrated SMRT and Illumina Sequencing Provide New Insights into Crocin Biosynthesis of Gardenia jasminoides
Source: Int J Mol Sci. 2022 Jun 5;23(11):6321. doi: 10.3390/ijms23116321 (PMC9181021; doi:10.3390/ijms23116321)
Supplement: Supplementary file 1 [file ijms-23-06321-s001.zip › Table S9.xlsx]

## Sheet: Table S9
Tissue	JUL	AUG	SEP	NOV	τ score
MSTRG_10155	0.0524368	0	0	0	1
MSTRG_10162	0	0	0	0.0164588	1
MSTRG_10443	0.00582717	0	0	0	1
MSTRG_1146	0	0	0	0.00256797	1
MSTRG_1482	0	0	0	0.00521062	1
MSTRG_1621	0	0.00595708	0	0	1
MSTRG_1700	0	0	0	0.00134634	1
MSTRG_1798	0	0.00185985	0	0	1
MSTRG_1810	0	0.0112855	0	0	1
MSTRG_192	0	0	0.00535565	0	1
MSTRG_2036	0	0.00158818	0	0	1
MSTRG_2153	0.0110538	0	0	0	1
MSTRG_229	0	0.0529705	0	0	1
MSTRG_2483	0.00634907	0	0	0	1
MSTRG_2550	0	0	0	0.0169443	1
MSTRG_2607	0.742567	0	0	0	1
MSTRG_2629	0	0	0	0.00791276	1
MSTRG_2904	0	0	0	0.0067956	1
MSTRG_2905	0	0.0010975	0	0	1
MSTRG_321	0	0	0	0.0129168	1
MSTRG_3250	0	0	0	0.00135172	1
MSTRG_337	0	0	0	0.00142683	1
MSTRG_3567	0.0115578	0	0	0	1
MSTRG_4204	0	0	0.00419731	0	1
MSTRG_4637	0	0.00732976	0	0	1
MSTRG_4962	0.00133528	0	0	0	1
MSTRG_6665	0	0.00669824	0	0	1
MSTRG_6999	0	0	0.00434007	0	1
MSTRG_7051	0	0	0.0432417	0	1
MSTRG_7184	0	0	0	0.0025316	1
MSTRG_7318	0	0.00635645	0	0	1
MSTRG_7533	0	0	0.00919469	0	1
MSTRG_7548	0.0177595	0	0	0	1
MSTRG_7574	0	0	0	0.0152389	1
MSTRG_8216	0	0.0125919	0	0	1
MSTRG_8413	0	0.00543062	0	0	1
MSTRG_8617	0	0	0	0.023572	1
MSTRG_9222	0	0	0	0.00467011	1
MSTRG_947	0.674435	0	0	0	1
MSTRG_2198	0	0.050799	0	12.8884	0.998686
MSTRG_7672	0	0.00412232	0.619737	98.8567	0.997896
MSTRG_1228	5.73095	0.0511857	0	0	0.997023
MSTRG_7941	5.16559	0	0.0413973	0.0146853	0.996381
MSTRG_10515	3.22031	0.0387215	0.00654508	0.00445062	0.994854
MSTRG_1223	0.20391	0.00323498	0	0	0.994712
MSTRG_1397	0.74758	0.0126459	0	0	0.994361
MSTRG_2538	1.87941	0.0172868	0.00634067	0.0247631	0.991417
MSTRG_10536	3.65889	0.0951923	0	0	0.991328
MSTRG_4445	1.11682	0.0406989	0	0	0.987853
MSTRG_5599	1.54712	0.012008	0.00811737	0.0380932	0.987457
MSTRG_5957	13.0966	0.387502	0.0444877	0.071932	0.987174
MSTRG_5267	2.45993	0.0923807	0.00576736	0.00714006	0.985733
MSTRG_2481	39.7275	1.69039	0.110959	0	0.984886
MSTRG_1227	0.653574	0.00508664	0.00629306	0.0190744	0.984468
MSTRG_8386	24.4873	0.988675	0.246897	0.0173878	0.982944
MSTRG_3227	0.41066	0.00316799	0.00391935	0.0144588	0.982511
MSTRG_4828	0.704909	0.031433	0.00637665	0	0.982121
MSTRG_1191	0.273497	0.0186747	0	0	0.97724
MSTRG_8373	8.97108	29.1069	726.529	14.106	0.976058
MSTRG_4009	0.0714804	0.00514938	0	0	0.975987
MSTRG_6529	0.367742	0.0256118	0.00207815	0	0.974901
MSTRG_2441	0.144306	0	0	0.0108748	0.97488
MSTRG_62	1.35327	0.0286792	0.0204486	0.0586004	0.973465
MSTRG_8232	0.810714	0.0070428	0.00452971	0.0576757	0.971528
MSTRG_2678	0.134816	0.00740689	0	0.00494304	0.969465
MSTRG_5113	0.00116218	0	0	0.0125518	0.969136
MSTRG_3880	60.5137	4.44418	1.01557	0.502113	0.96716
MSTRG_5483	6.07965	0.176608	0.17718	0.263455	0.966158
MSTRG_4372	5.59252	0.4229	0.0106308	0.16491	0.964331
MSTRG_5798	0.150767	0.00862543	0.00866711	0	0.961768
MSTRG_10023	14.6759	0.543718	0.0890414	1.16311	0.959211
MSTRG_4672	8.33656	0.272034	0.191594	0.618066	0.956749
MSTRG_6930	0.271221	0.00604313	0	0.0321636	0.953044
MSTRG_6918	0	0	0.00974016	0.0688042	0.952812
MSTRG_7463	0.162974	0.00643309	0	0.0168971	0.952282
MSTRG_10413	0	0.0265429	0	0.00386739	0.951432
