# Supplementary material for: Integrated SMRT and Illumina Sequencing Provide New Insights into Crocin Biosynthesis of Gardenia jasminoides
Source: Int J Mol Sci. 2022 Jun 5;23(11):6321. doi: 10.3390/ijms23116321 (PMC9181021; doi:10.3390/ijms23116321)
Supplement: Supplementary file 1 [file ijms-23-06321-s001.zip › Table S10.xlsx]

## Sheet: Table S10
Name	Case Group	Control Group	log2FC	FDR	Threshold
CCD4-4	AUG	JUL	12.7477	1.49059e-23	Up
HMGS02	AUG	JUL	-2.97697	0.0117674	Down
ALDH01	SEP	JUL	2.07241	0.000533888	Up
ALDH09	SEP	JUL	3.38231	0.00274605	Up
CCD4-4	SEP	JUL	14.6808	2.62382e-21	Up
GGPPS02	NOV	JUL	2.41214	0.00666898	Up
ALDH01	NOV	JUL	2.06921	0.000319585	Up
ALDH08	NOV	JUL	2.08635	0.00439142	Up
ALDH09	NOV	JUL	3.89991	3.28044e-05	Up
CCD4-4	NOV	JUL	15.6545	1.06454e-29	Up
PDS01	NOV	JUL	2.06207	0.00330073	Up
GGPPS03	NOV	JUL	-7.63807	2.78724e-06	Down
CCD4-1	NOV	JUL	-6.39093	0.00143591	Down
HMGS02	NOV	AUG	3.4965	0.00110013	Up
ALDH08	NOV	AUG	2.73648	3.23038e-05	Up
ALDH09	NOV	AUG	3.11521	0.0180824	Up
LCYB01	NOV	AUG	2.46041	0.00272449	Up
GGPPS03	NOV	AUG	-6.18714	0.00193588	Down
CCD4-1	NOV	AUG	-6.08002	0.0086115	Down
GGPPS03	NOV	SEP	-5.57149	0.00990822	Down
