# Supplementary material for: Integrated SMRT and Illumina Sequencing Provide New Insights into Crocin Biosynthesis of Gardenia jasminoides
Source: Int J Mol Sci. 2022 Jun 5;23(11):6321. doi: 10.3390/ijms23116321 (PMC9181021; doi:10.3390/ijms23116321)
Supplement: Supplementary file 1 [file ijms-23-06321-s001.zip › Table S11.xlsx]

## Sheet: Table S11 Total
lncRNA	Annotation	Tytpe
MSTRG_7678_1	ALDH01	trans
MSTRG_10413_2	ALDH02	trans
MSTRG_4251_2	ALDH02	trans
MSTRG_9818_1	ALDH02	trans
MSTRG_5041_2	ALDH07	cis
MSTRG_10019_1	ALDH07	trans
MSTRG_1003_1	ALDH07	trans
MSTRG_10568_2	ALDH07	trans
MSTRG_10679_1	ALDH07	trans
MSTRG_1262_1	ALDH07	trans
MSTRG_1475_1	ALDH07	trans
MSTRG_2357_2	ALDH07	trans
MSTRG_2380_1	ALDH07	trans
MSTRG_2478_1	ALDH07	trans
MSTRG_3731_1	ALDH07	trans
MSTRG_6010_1	ALDH07	trans
MSTRG_8037_2	ALDH07	trans
MSTRG_8403_1	ALDH07	trans
MSTRG_8689_1	ALDH07	trans
MSTRG_9344_2	ALDH07	trans
MSTRG_9362_1	ALDH07	trans
MSTRG_5534_2	ALDH08	cis
MSTRG_10019_1	ALDH08	trans
MSTRG_1003_1	ALDH08	trans
MSTRG_10568_2	ALDH08	trans
MSTRG_10679_1	ALDH08	trans
MSTRG_1262_1	ALDH08	trans
MSTRG_1952_1	ALDH08	trans
MSTRG_2357_2	ALDH08	trans
MSTRG_2380_1	ALDH08	trans
MSTRG_2478_1	ALDH08	trans
MSTRG_3731_1	ALDH08	trans
MSTRG_560_1	ALDH08	trans
MSTRG_5978_1	ALDH08	trans
MSTRG_6005_1	ALDH08	trans
MSTRG_6010_1	ALDH08	trans
MSTRG_6300_1	ALDH08	trans
MSTRG_7779_1	ALDH08	trans
MSTRG_8037_2	ALDH08	trans
MSTRG_8403_1	ALDH08	trans
MSTRG_8689_1	ALDH08	trans
MSTRG_8881_1	ALDH08	trans
MSTRG_9344_2	ALDH08	trans
MSTRG_9362_1	ALDH08	trans
MSTRG_5534_2	ALDH09	cis
MSTRG_10028_1	ALDH09	trans
MSTRG_10365_1	ALDH09	trans
MSTRG_1145_1	ALDH09	trans
MSTRG_249_1	ALDH09	trans
MSTRG_3053_1	ALDH09	trans
MSTRG_4097_1	ALDH09	trans
MSTRG_5978_1	ALDH09	trans
MSTRG_6005_1	ALDH09	trans
MSTRG_6185_4	ALDH09	trans
MSTRG_7413_1	ALDH09	trans
MSTRG_7635_1	ALDH09	trans
MSTRG_7779_1	ALDH09	trans
MSTRG_8029_1	ALDH09	trans
MSTRG_8403_1	ALDH09	trans
MSTRG_9198_1	ALDH10	cis
MSTRG_9202_1	ALDH10	cis
MSTRG_9203_1	ALDH10	cis
MSTRG_1095_1	ALDH11	cis
MSTRG_1102_1	ALDH11	cis
MSTRG_1749_1	ALDH11	trans
MSTRG_3513_1	ALDH11	trans
MSTRG_845_2	ALDH11	trans
MSTRG_1755_1	ALDH12	cis
MSTRG_1764_2	ALDH12	cis
MSTRG_2516_1	CCD4-1	trans
MSTRG_9230_1	CCD4-1	trans
MSTRG_9530_1	CCD4-1	trans
MSTRG_9590_2	CCD4-1	trans
MSTRG_10028_1	CCD4-4	trans
MSTRG_10074_3	CCD4-4	trans
MSTRG_10216_1	CCD4-4	trans
MSTRG_10568_2	CCD4-4	trans
MSTRG_1145_1	CCD4-4	trans
MSTRG_1420_2	CCD4-4	trans
MSTRG_1606_1	CCD4-4	trans
MSTRG_3711_1	CCD4-4	trans
MSTRG_4097_1	CCD4-4	trans
MSTRG_4394_1	CCD4-4	trans
MSTRG_5978_1	CCD4-4	trans
MSTRG_6005_1	CCD4-4	trans
MSTRG_6185_4	CCD4-4	trans
MSTRG_7765_2	CCD4-4	trans
MSTRG_7779_1	CCD4-4	trans
MSTRG_7975_1	CCD4-4	trans
MSTRG_8029_1	CCD4-4	trans
MSTRG_8403_1	CCD4-4	trans
MSTRG_10019_1	CRTISO01	trans
MSTRG_10365_1	CRTISO01	trans
MSTRG_10568_2	CRTISO01	trans
MSTRG_10679_1	CRTISO01	trans
MSTRG_1145_1	CRTISO01	trans
MSTRG_1475_1	CRTISO01	trans
MSTRG_2478_1	CRTISO01	trans
MSTRG_3711_1	CRTISO01	trans
MSTRG_3731_1	CRTISO01	trans
MSTRG_4097_1	CRTISO01	trans
MSTRG_4394_1	CRTISO01	trans
MSTRG_5978_1	CRTISO01	trans
MSTRG_6185_4	CRTISO01	trans
MSTRG_6627_1	CRTISO01	trans
MSTRG_7765_2	CRTISO01	trans
MSTRG_7779_1	CRTISO01	trans
MSTRG_8029_1	CRTISO01	trans
MSTRG_8403_1	CRTISO01	trans
MSTRG_8689_1	CRTISO01	trans
MSTRG_9362_1	CRTISO01	trans
MSTRG_2902_1	DXS01	cis
MSTRG_1145_1	GGPPS02	trans
MSTRG_1606_1	GGPPS02	trans
MSTRG_3711_1	GGPPS02	trans
MSTRG_4097_1	GGPPS02	trans
MSTRG_5829_1	GGPPS02	trans
MSTRG_5978_1	GGPPS02	trans
MSTRG_6185_4	GGPPS02	trans
MSTRG_7441_2	GGPPS02	trans
MSTRG_7779_1	GGPPS02	trans
MSTRG_5534_2	GGPPS03	trans
MSTRG_6092_1	GGPPS03	trans
MSTRG_7480_2	GGPPS03	trans
MSTRG_5847_1	HDR01	trans
MSTRG_7837_2	HDR01	trans
MSTRG_7103_1	HDS01	cis
MSTRG_7105_1	HDS01	cis
MSTRG_9874_3	HMGR01	cis
MSTRG_9881_1	HMGR01	cis
MSTRG_7413_1	HMGS01	trans
MSTRG_3954_1	HMGS02	cis
MSTRG_3962_1	HMGS02	cis
MSTRG_5860_1	HMGS02	trans
MSTRG_1820_1	IDI01	trans
MSTRG_4513_1	IDI01	trans
MSTRG_5259_2	IDI01	trans
MSTRG_5829_1	LCYB01	trans
MSTRG_5978_1	LCYB01	trans
MSTRG_7779_1	LCYB01	trans
MSTRG_1820_1	MCT01	trans
MSTRG_7678_1	MDS01	cis
MSTRG_5560_1	MDS01	trans
MSTRG_10048_1	MVK01	trans
MSTRG_6218_1	MVK01	trans
MSTRG_6300_1	MVK01	trans
MSTRG_9233_1	PDS01	cis
MSTRG_9241_1	PDS01	cis
MSTRG_10028_1	PDS01	trans
MSTRG_10074_3	PDS01	trans
MSTRG_10216_1	PDS01	trans
MSTRG_1145_1	PDS01	trans
MSTRG_121_1	PDS01	trans
MSTRG_1420_2	PDS01	trans
MSTRG_1606_1	PDS01	trans
MSTRG_3198_1	PDS01	trans
MSTRG_4097_1	PDS01	trans
MSTRG_4394_1	PDS01	trans
MSTRG_5978_1	PDS01	trans
MSTRG_6005_1	PDS01	trans
MSTRG_6185_4	PDS01	trans
MSTRG_7299_1	PDS01	trans
MSTRG_7765_2	PDS01	trans
MSTRG_7779_1	PDS01	trans
MSTRG_7927_1	PDS01	trans
MSTRG_8029_1	PDS01	trans
MSTRG_9357_2	PSY01	cis
MSTRG_9362_1	PSY01	cis
MSTRG_3045_1	UGT02	trans
MSTRG_6291_1	UGT04	trans
MSTRG_10019_1	ZDS01	trans
MSTRG_10568_2	ZDS01	trans
MSTRG_10679_1	ZDS01	trans
MSTRG_1145_1	ZDS01	trans
MSTRG_1262_1	ZDS01	trans
MSTRG_2380_1	ZDS01	trans
MSTRG_3711_1	ZDS01	trans
MSTRG_3731_1	ZDS01	trans
MSTRG_4394_1	ZDS01	trans
MSTRG_5978_1	ZDS01	trans
MSTRG_6010_1	ZDS01	trans
MSTRG_6185_4	ZDS01	trans
MSTRG_7765_2	ZDS01	trans
MSTRG_7779_1	ZDS01	trans
MSTRG_8029_1	ZDS01	trans
MSTRG_8037_2	ZDS01	trans
MSTRG_8403_1	ZDS01	trans
MSTRG_8689_1	ZDS01	trans
MSTRG_9362_1	ZDS01	trans

## Sheet: Table S11 upstream
lncRNA	Annotation	Tytpe
MSTRG_9874_3	HMGR01	cis
MSTRG_9881_1	HMGR01	cis
MSTRG_7413_1	HMGS01	trans
MSTRG_3954_1	HMGS02	cis
MSTRG_3962_1	HMGS02	cis
MSTRG_5860_1	HMGS02	trans
MSTRG_10048_1	MVK01	trans
MSTRG_6218_1	MVK01	trans
MSTRG_6300_1	MVK01	trans
MSTRG_2902_1	DXS01	cis
MSTRG_1820_1	MCT01	trans
MSTRG_7678_1	MDS01	cis
MSTRG_5560_1	MDS01	trans
MSTRG_7103_1	HDS01	cis
MSTRG_7105_1	HDS01	cis
MSTRG_5847_1	HDR01	trans
MSTRG_7837_2	HDR01	trans
MSTRG_1820_1	IDI01	trans
MSTRG_4513_1	IDI01	trans
MSTRG_5259_2	IDI01	trans
MSTRG_1145_1	GGPPS02	trans
MSTRG_1606_1	GGPPS02	trans
MSTRG_3711_1	GGPPS02	trans
MSTRG_4097_1	GGPPS02	trans
MSTRG_5829_1	GGPPS02	trans
MSTRG_5978_1	GGPPS02	trans
MSTRG_6185_4	GGPPS02	trans
MSTRG_7441_2	GGPPS02	trans
MSTRG_7779_1	GGPPS02	trans
MSTRG_5534_2	GGPPS03	trans
MSTRG_6092_1	GGPPS03	trans
MSTRG_7480_2	GGPPS03	trans

## Sheet: Table S11 midstream
lncRNA	Annotation	Tytpe
MSTRG_9357_2	PSY01	cis
MSTRG_9362_1	PSY01	cis
MSTRG_9233_1	PDS01	cis
MSTRG_9241_1	PDS01	cis
MSTRG_10028_1	PDS01	trans
MSTRG_10074_3	PDS01	trans
MSTRG_10216_1	PDS01	trans
MSTRG_1145_1	PDS01	trans
MSTRG_121_1	PDS01	trans
MSTRG_1420_2	PDS01	trans
MSTRG_1606_1	PDS01	trans
MSTRG_3198_1	PDS01	trans
MSTRG_4097_1	PDS01	trans
MSTRG_4394_1	PDS01	trans
MSTRG_5978_1	PDS01	trans
MSTRG_6005_1	PDS01	trans
MSTRG_6185_4	PDS01	trans
MSTRG_7299_1	PDS01	trans
MSTRG_7765_2	PDS01	trans
MSTRG_7779_1	PDS01	trans
MSTRG_7927_1	PDS01	trans
MSTRG_8029_1	PDS01	trans
MSTRG_10019_1	ZDS01	trans
MSTRG_10568_2	ZDS01	trans
MSTRG_10679_1	ZDS01	trans
MSTRG_1145_1	ZDS01	trans
MSTRG_1262_1	ZDS01	trans
MSTRG_2380_1	ZDS01	trans
MSTRG_3711_1	ZDS01	trans
MSTRG_3731_1	ZDS01	trans
MSTRG_4394_1	ZDS01	trans
MSTRG_5978_1	ZDS01	trans
MSTRG_6010_1	ZDS01	trans
MSTRG_6185_4	ZDS01	trans
MSTRG_7765_2	ZDS01	trans
MSTRG_7779_1	ZDS01	trans
MSTRG_8029_1	ZDS01	trans
MSTRG_8037_2	ZDS01	trans
MSTRG_8403_1	ZDS01	trans
MSTRG_8689_1	ZDS01	trans
MSTRG_9362_1	ZDS01	trans
MSTRG_10019_1	CRTISO01	trans
MSTRG_10365_1	CRTISO01	trans
MSTRG_10568_2	CRTISO01	trans
MSTRG_10679_1	CRTISO01	trans
MSTRG_1145_1	CRTISO01	trans
MSTRG_1475_1	CRTISO01	trans
MSTRG_2478_1	CRTISO01	trans
MSTRG_3711_1	CRTISO01	trans
MSTRG_3731_1	CRTISO01	trans
MSTRG_4097_1	CRTISO01	trans
MSTRG_4394_1	CRTISO01	trans
MSTRG_5978_1	CRTISO01	trans
MSTRG_6185_4	CRTISO01	trans
MSTRG_6627_1	CRTISO01	trans
MSTRG_7765_2	CRTISO01	trans
MSTRG_7779_1	CRTISO01	trans
MSTRG_8029_1	CRTISO01	trans
MSTRG_8403_1	CRTISO01	trans
MSTRG_8689_1	CRTISO01	trans
MSTRG_9362_1	CRTISO01	trans
MSTRG_5829_1	LCYB01	trans
MSTRG_5978_1	LCYB01	trans
MSTRG_7779_1	LCYB01	trans

## Sheet: Table S11 downstream
lncRNA	Annotation	Tytpe
MSTRG_2516_1	CCD4-1	trans
MSTRG_9230_1	CCD4-1	trans
MSTRG_9530_1	CCD4-1	trans
MSTRG_9590_2	CCD4-1	trans
MSTRG_10028_1	CCD4-4	trans
MSTRG_10074_3	CCD4-4	trans
MSTRG_10216_1	CCD4-4	trans
MSTRG_10568_2	CCD4-4	trans
MSTRG_1145_1	CCD4-4	trans
MSTRG_1420_2	CCD4-4	trans
MSTRG_1606_1	CCD4-4	trans
MSTRG_3711_1	CCD4-4	trans
MSTRG_4097_1	CCD4-4	trans
MSTRG_4394_1	CCD4-4	trans
MSTRG_5978_1	CCD4-4	trans
MSTRG_6005_1	CCD4-4	trans
MSTRG_6185_4	CCD4-4	trans
MSTRG_7765_2	CCD4-4	trans
MSTRG_7779_1	CCD4-4	trans
MSTRG_7975_1	CCD4-4	trans
MSTRG_8029_1	CCD4-4	trans
MSTRG_8403_1	CCD4-4	trans
MSTRG_7678_1	ALDH01	trans
MSTRG_10413_2	ALDH02	trans
MSTRG_4251_2	ALDH02	trans
MSTRG_9818_1	ALDH02	trans
MSTRG_5041_2	ALDH07	cis
MSTRG_10019_1	ALDH07	trans
MSTRG_1003_1	ALDH07	trans
MSTRG_10568_2	ALDH07	trans
MSTRG_10679_1	ALDH07	trans
MSTRG_1262_1	ALDH07	trans
MSTRG_1475_1	ALDH07	trans
MSTRG_2357_2	ALDH07	trans
MSTRG_2380_1	ALDH07	trans
MSTRG_2478_1	ALDH07	trans
MSTRG_3731_1	ALDH07	trans
MSTRG_6010_1	ALDH07	trans
MSTRG_8037_2	ALDH07	trans
MSTRG_8403_1	ALDH07	trans
MSTRG_8689_1	ALDH07	trans
MSTRG_9344_2	ALDH07	trans
MSTRG_9362_1	ALDH07	trans
MSTRG_5534_2	ALDH08	cis
MSTRG_10019_1	ALDH08	trans
MSTRG_1003_1	ALDH08	trans
MSTRG_10568_2	ALDH08	trans
MSTRG_10679_1	ALDH08	trans
MSTRG_1262_1	ALDH08	trans
MSTRG_1952_1	ALDH08	trans
MSTRG_2357_2	ALDH08	trans
MSTRG_2380_1	ALDH08	trans
MSTRG_2478_1	ALDH08	trans
MSTRG_3731_1	ALDH08	trans
MSTRG_560_1	ALDH08	trans
MSTRG_5978_1	ALDH08	trans
MSTRG_6005_1	ALDH08	trans
MSTRG_6010_1	ALDH08	trans
MSTRG_6300_1	ALDH08	trans
MSTRG_7779_1	ALDH08	trans
MSTRG_8037_2	ALDH08	trans
MSTRG_8403_1	ALDH08	trans
MSTRG_8689_1	ALDH08	trans
MSTRG_8881_1	ALDH08	trans
MSTRG_9344_2	ALDH08	trans
MSTRG_9362_1	ALDH08	trans
MSTRG_5534_2	ALDH09	cis
MSTRG_10028_1	ALDH09	trans
MSTRG_10365_1	ALDH09	trans
MSTRG_1145_1	ALDH09	trans
MSTRG_249_1	ALDH09	trans
MSTRG_3053_1	ALDH09	trans
MSTRG_4097_1	ALDH09	trans
MSTRG_5978_1	ALDH09	trans
MSTRG_6005_1	ALDH09	trans
MSTRG_6185_4	ALDH09	trans
MSTRG_7413_1	ALDH09	trans
MSTRG_7635_1	ALDH09	trans
MSTRG_7779_1	ALDH09	trans
MSTRG_8029_1	ALDH09	trans
MSTRG_8403_1	ALDH09	trans
MSTRG_9198_1	ALDH10	cis
MSTRG_9202_1	ALDH10	cis
MSTRG_9203_1	ALDH10	cis
MSTRG_1095_1	ALDH11	cis
MSTRG_1102_1	ALDH11	cis
MSTRG_1749_1	ALDH11	trans
MSTRG_3513_1	ALDH11	trans
MSTRG_845_2	ALDH11	trans
MSTRG_1755_1	ALDH12	cis
MSTRG_1764_2	ALDH12	cis
MSTRG_3045_1	UGT02	trans
MSTRG_6291_1	UGT04	trans
