# Supplementary material for: Integrated SMRT and Illumina Sequencing Provide New Insights into Crocin Biosynthesis of Gardenia jasminoides
Source: Int J Mol Sci. 2022 Jun 5;23(11):6321. doi: 10.3390/ijms23116321 (PMC9181021; doi:10.3390/ijms23116321)
Supplement: Supplementary file 1 [file ijms-23-06321-s001.zip › Table S12.xlsx]

## Sheet: Table S12
Name	Case Group	Control Group	log2FC	FDR	Threshold
MSTRG_6092_1	AUG	JUL	-6.82718	6.38639e-19	Down
MSTRG_1606_1	SEP	JUL	0.00641274	0.0465953	Up
MSTRG_845_2	SEP	JUL	4.83961e-07	2.45611e-05	Down
MSTRG_1749_1	SEP	JUL	4.57697e-13	7.24992e-11	Down
MSTRG_6092_1	SEP	JUL	7.58789e-17	2.0032e-14	Down
MSTRG_7480_2	SEP	JUL	0.000145755	0.00268461	Down
MSTRG_9530_1	SEP	JUL	1.13752e-05	0.000375382	Down
MSTRG_1262_1	NOV	JUL	0.00737718	0.0333956	Up
MSTRG_1420_2	NOV	JUL	6.76257e-10	4.74507e-08	Up
MSTRG_1475_1	NOV	JUL	2.3084e-07	8.45075e-06	Up
MSTRG_2357_2	NOV	JUL	0.000260107	0.00260287	Up
MSTRG_2478_1	NOV	JUL	0.000103714	0.00128422	Up
MSTRG_6010_1	NOV	JUL	0.00956433	0.0412983	Up
MSTRG_8689_1	NOV	JUL	0.00528276	0.02632	Up
MSTRG_9344_2	NOV	JUL	0.00122441	0.00866348	Up
MSTRG_10019_1	NOV	JUL	4.54987e-06	9.57747e-05	Up
MSTRG_10568_2	NOV	JUL	0.000514076	0.00437224	Up
MSTRG_845_2	NOV	JUL	0.000771965	0.00601847	Down
MSTRG_1749_1	NOV	JUL	0.00387682	0.0211052	Down
MSTRG_6092_1	NOV	JUL	9.73664e-16	1.17118e-13	Down
MSTRG_7480_2	NOV	JUL	2.76057e-16	3.87399e-14	Down
MSTRG_9530_1	NOV	JUL	0.00268469	0.016032	Down
MSTRG_9590_2	NOV	JUL	0.0038795	0.0211052	Down
MSTRG_7480_2	SEP	AUG	0.000572048	0.0386132	Down
MSTRG_1420_2	NOV	AUG	1.82835e-08	1.31184e-06	Up
MSTRG_2357_2	NOV	AUG	0.00420952	0.0416597	Up
MSTRG_2478_1	NOV	AUG	0.000591909	0.0098266	Up
MSTRG_4394_1	NOV	AUG	8.36019e-05	0.00214773	Up
MSTRG_9344_2	NOV	AUG	3.47323e-05	0.00103119	Up
MSTRG_10019_1	NOV	AUG	0.000441668	0.00845057	Up
MSTRG_7480_2	NOV	AUG	1.17186e-14	3.82548e-12	Down
MSTRG_9344_2	3147.69	288.155	5.54992e-06	0.000797338	Up
